# Supplementary material for: High-throughput low-cost nl-qPCR for enteropathogen detection: A proof-of-concept among hospitalized patients in Bangladesh
Source: PLoS One. 2021 Oct 1;16(10):e0257708. doi: 10.1371/journal.pone.0257708 (PMC8486112; doi:10.1371/journal.pone.0257708)
Supplement: S1 Dataset — (CSV) [file pone.0257708.s004.csv]

	patient_id	Date..Time.of.admission	Date..Time.of.discharge	Residence.District	Residence.Union	Residence.Village	AvgCt.invA	Result.invA	AvgCt.STp	Result.STp	AvgCt.bfpA	Result.bfpA	AvgCt.stx1	Result.stx1	AvgCt.stx2	Result.stx2	AvgCt.eaeA	Result.eaeA	AvgCt.ITS1.region.of.rRNA	Result.ITS1.region.of.rRNA	AvgCt.ITS1_Ascaris	Result.ITS1_Ascaris	AvgCt.18S_Crypto	Result.18S_Crypto	AvgCt.18S_E.histolytica	Result.18S_E.histolytica	AvgCt.18S_Giardia	Result.18S_Giardia	AvgCt.18S_Trichuris	Result.18S_Trichuris	AvgCt.16S.rRNA_Bacteria	Result.16S.rRNA_Bacteria	AvgCt.yadA	Result.yadA	AvgCt.ureA	Result.ureA	AvgCt.eltA	Result.eltA	AvgCt.STh	Result.STh	AvgCt.aggR	Result.aggR	AvgCt.cdtA	Result.cdtA	AvgCt.ipaH	Result.ipaH	Vibrio cholerae (new tcpa primers). Data type = Continuous Variable vs NA	Vibrio cholerae (new tcpa primers)	AvgCt.16S.rRNA_Archaea
1	M090701	2015-09-07 04:45:43+00:00	2015-09-10 04:30:30+00:00	Netrakona	Madan	Madan	NA	Negative	NA	Negative	NA	Negative	NA	Negative	32.94	Negative	28.03	Negative	25.98	Positive	32.92	Negative	NA	Negative	NA	Negative	NA	Negative	NA	Negative	10.855	Positive	NA	Negative	NA	Negative	NA	Negative	NA	Negative	28.69	Negative	NA	Negative	22.345	Positive	NA	NonDetect	34.01
2	M090702	2015-09-07 12:10:27+00:00	2015-09-09 03:30:52+00:00	Netrakona	Madan	Madan	NA	Negative	NA	Negative	NA	Negative	NA	Negative	NA	Negative	NA	Negative	NA	Negative	NA	Negative	NA	Negative	NA	Negative	NA	Negative	NA	Negative	24.52	Positive	NA	Negative	NA	Negative	NA	Negative	NA	Negative	NA	Negative	NA	Negative	NA	Negative	NA	NonDetect	NA
3	M090703	2015-09-07 13:00:10+00:00	2015-09-10 04:30:30+00:00	Netrakona	Nayekpur	Barati	NA	Negative	NA	Negative	NA	Negative	NA	Negative	31.71	Negative	NA	Negative	30.1	Negative	NA	Negative	NA	Negative	NA	Negative	NA	Negative	NA	Negative	18.725	Positive	NA	Negative	NA	Negative	NA	Negative	NA	Negative	NA	Negative	NA	Negative	33.99	Negative	NA	NonDetect	NA
4	M090801	2015-09-08 05:20:42+00:00	2015-09-13 03:30:06+00:00	Netrakona	Madan	Uttar Bajitpur (Part)	NA	Negative	NA	Negative	NA	Negative	NA	Negative	27.81	Maybe	NA	Negative	28.18	Negative	NA	Negative	NA	Negative	NA	Negative	32.115	Negative	NA	Negative	14.63	Positive	NA	Negative	NA	Negative	NA	Negative	NA	Negative	NA	Negative	NA	Negative	NA	Negative	NA	NonDetect	34.04
5	M090901	2015-09-09 03:10:52+00:00	2015-09-10 03:30:58+00:00	Netrakona	Kaitail	Kaitail	NA	Negative	NA	Negative	NA	Negative	NA	Negative	28.64	Negative	NA	Negative	NA	Negative	NA	Negative	NA	Negative	NA	Negative	29.72	Negative	NA	Negative	17.175	Positive	NA	Negative	NA	Negative	NA	Negative	NA	Negative	NA	Negative	NA	Negative	34.71	Negative	NA	NonDetect	NA
6	M090902	2015-09-09 16:30:11+00:00	2015-09-10 04:00:36+00:00	Netrakona	Kaitail	Barabari	NA	Negative	19.525	Positive	NA	Negative	NA	Negative	NA	Negative	27.115	Maybe	NA	Negative	NA	Negative	NA	Negative	NA	Negative	33.955	Negative	NA	Negative	14.635	Positive	NA	Negative	NA	Negative	19.895	Positive	NA	Negative	NA	Negative	NA	Negative	NA	Negative	NA	NonDetect	NA
7	M090903	2015-09-09 02:20:52+00:00	2015-09-11 04:00:44+00:00	Netrakona	Madan	Madan	NA	Negative	NA	Negative	NA	Negative	NA	Negative	29.63	Negative	NA	Negative	NA	Negative	34.68	Negative	NA	Negative	NA	Negative	33.61	Negative	NA	Negative	14.145	Positive	NA	Negative	NA	Negative	20.17	Positive	19.645	Positive	NA	Negative	NA	Negative	24.175	Positive	NA	NonDetect	30.225
8	M091301	2015-09-13 03:10:43+00:00	2015-09-14 04:30:21+00:00	Netrakona	Chakua	Lepsia	NA	NA	NA	NA	NA	NA	NA	NA	NA	NA	NA	NA	NA	NA	NA	NA	NA	NA	NA	NA	NA	NA	NA	NA	NA	NA	NA	NA	NA	NA	NA	NA	NA	NA	NA	NA	NA	NA	NA	NA	NA	NA	NA
9	M091401	2015-09-14 02:15:55+00:00	2015-09-14 11:20:52+00:00	Netrakona	Madan	Barburi	NA	Negative	NA	Negative	NA	Negative	NA	Negative	34.43	Negative	25.58	Positive	29.155	Negative	33.285	Negative	NA	Negative	NA	Negative	30.585	Negative	NA	Negative	14.875	Positive	NA	Negative	NA	Negative	NA	Negative	NA	Negative	NA	Negative	NA	Negative	NA	Negative	NA	NonDetect	28.47
10	M091501	2015-09-14 18:05:58+00:00	2015-09-15 03:30:20+00:00	Netrakona	Madan	Madan	NA	Negative	NA	Negative	NA	Negative	NA	Negative	NA	Negative	NA	Negative	NA	Negative	34.58	Negative	NA	Negative	27.38	Maybe	34.06	Negative	NA	Negative	17.155	Positive	NA	Negative	NA	Negative	NA	Negative	NA	Negative	NA	Negative	NA	Negative	NA	Negative	NA	NA	NA
11	M091502	2015-09-15 03:40:06+00:00	2015-09-16 07:30:35+00:00	Netrakona	Madan	Uchitpur	NA	Negative	NA	Negative	33.53	Negative	NA	Negative	26.85	Maybe	25.765	Positive	28.475	Negative	NA	Negative	NA	Negative	NA	Negative	NA	Negative	NA	Negative	13.45	Positive	NA	Negative	NA	Negative	NA	Negative	16.115	Positive	24.05	Positive	NA	Negative	NA	Negative	NA	NonDetect	NA
12	M091503	2015-09-15 06:30:48+00:00	2015-09-17 07:30:04+00:00	Netrakona	Madan	Uchitpur	NA	Negative	NA	Negative	NA	Negative	NA	Negative	NA	Negative	32.38	Negative	25.77	Positive	NA	Negative	NA	Negative	NA	Negative	NA	Negative	NA	Negative	18.1	Positive	NA	Negative	NA	Negative	NA	Negative	24.17	Positive	NA	Negative	NA	Negative	NA	Negative	NA	NonDetect	NA
13	M091801	2015-09-18 12:10:11+00:00	2015-09-20 05:00:02+00:00	Netrakona	Sukhari	Mangalsree	NA	NA	NA	NA	NA	NA	NA	NA	NA	NA	NA	NA	NA	NA	NA	NA	NA	NA	NA	NA	NA	NA	NA	NA	NA	NA	NA	NA	NA	NA	NA	NA	NA	NA	NA	NA	NA	NA	NA	NA	NA	NA	NA
14	M091802	2015-09-18 14:15:46+00:00	2015-09-20 05:00:05+00:00	Netrakona	Tiasree	Kutarikona	NA	NA	NA	NA	NA	NA	NA	NA	NA	NA	NA	NA	NA	NA	NA	NA	NA	NA	NA	NA	NA	NA	NA	NA	NA	NA	NA	NA	NA	NA	NA	NA	NA	NA	NA	NA	NA	NA	NA	NA	NA	NA	NA
15	M092801	2015-09-28 02:00:02+00:00	2015-09-29 04:00:45+00:00	Netrakona	Kaitail	Shibasram	28.37	Negative	NA	Negative	NA	Negative	NA	Negative	25.84	Positive	NA	Negative	26.2	Maybe	NA	Negative	NA	Negative	NA	Negative	NA	Negative	NA	Negative	12.745	Positive	NA	Negative	NA	Negative	NA	Negative	NA	Negative	15.915	Positive	NA	Negative	NA	Negative	NA	NonDetect	NA
16	M092802	2015-09-28 03:30:08+00:00	2015-10-01 07:30:04+00:00	Netrakona	Chandgaon	Maidham	NA	NA	NA	NA	NA	NA	NA	NA	NA	NA	NA	NA	NA	NA	NA	NA	NA	NA	NA	NA	NA	NA	NA	NA	NA	NA	NA	NA	NA	NA	NA	NA	NA	NA	NA	NA	NA	NA	NA	NA	NA	NA	NA
17	M092803	2015-09-28 13:20:22+00:00	2015-09-29 13:00:33+00:00	Netrakona	Tiasree	Bhabanipur (Part)	NA	Negative	NA	Negative	NA	Negative	NA	Negative	NA	Negative	NA	Negative	26.02	Maybe	NA	Negative	NA	Negative	NA	Negative	NA	Negative	NA	Negative	19.635	Positive	NA	Negative	NA	Negative	28.43	Negative	NA	Negative	NA	Negative	NA	Negative	NA	Negative	NA	NonDetect	33.3
18	M092804	2015-09-28 13:50:24+00:00	2015-09-30 05:00:19+00:00	Netrakona	Tiasree	Kawali Binni	NA	Negative	NA	Negative	NA	Negative	NA	Negative	28.31	Negative	NA	Negative	26.72	Maybe	NA	Negative	NA	Negative	NA	Negative	NA	Negative	NA	Negative	15.055	Positive	NA	Negative	NA	Negative	NA	Negative	NA	Negative	20.06	Positive	NA	Negative	NA	Negative	NA	NonDetect	NA
19	M092805	2015-09-28 15:50:42+00:00	2015-09-29 10:30:15+00:00	Netrakona	Kaitail	Kaitail	NA	Negative	NA	Negative	NA	Negative	NA	Negative	NA	Negative	NA	Negative	NA	Negative	NA	Negative	NA	Negative	NA	Negative	NA	Negative	NA	Negative	20.14	Positive	NA	Negative	NA	Negative	NA	Negative	NA	Negative	27.88	Maybe	NA	Negative	NA	Negative	NA	NonDetect	NA
20	M092901	2015-09-29 05:20:22+00:00	2015-10-04 09:00:01+00:00	Netrakona	Madan	Madan	NA	Negative	NA	Negative	NA	Negative	NA	Negative	NA	Negative	NA	Negative	28.95	Negative	29.465	Negative	NA	Negative	NA	Negative	32.47	Negative	NA	Negative	8.375	Positive	NA	Negative	NA	Negative	25.695	Positive	33.385	Negative	19.18	Positive	NA	Negative	23.74	Positive	NA	NonDetect	NA
21	M092902	2015-09-29 06:28:00+00:00	2015-09-30 09:00:13+00:00	Netrakona	Madan	Madan	NA	Negative	NA	Negative	NA	Negative	NA	Negative	26.45	Maybe	NA	Negative	28.82	Negative	NA	Negative	NA	Negative	NA	Negative	31.36	Negative	NA	Negative	14.3	Positive	NA	Negative	NA	Negative	NA	Negative	25.915	Positive	17.64	Positive	NA	Negative	34.825	Negative	NA	NonDetect	34.53
22	M092903	2015-09-29 06:15:07+00:00	2015-09-29 07:30:48+00:00	Netrakona	Kaitail	Barabari	NA	NA	NA	NA	NA	NA	NA	NA	NA	NA	NA	NA	NA	NA	NA	NA	NA	NA	NA	NA	NA	NA	NA	NA	NA	NA	NA	NA	NA	NA	NA	NA	NA	NA	NA	NA	NA	NA	NA	NA	NA	NA	NA
23	M092904	2015-09-29 09:10:18+00:00	2015-09-30 16:00:56+00:00	Netrakona	Madan	Madan	27.6	Maybe	NA	Negative	NA	Negative	NA	Negative	33.29	Negative	NA	Negative	NA	Negative	NA	Negative	NA	Negative	NA	Negative	NA	Negative	NA	Negative	13.39	Positive	NA	Negative	NA	Negative	NA	Negative	NA	Negative	NA	Negative	NA	Negative	NA	Negative	NA	NonDetect	NA
24	M093001	2015-09-30 01:40:27+00:00	2015-10-01 08:00:11+00:00	Netrakona	Sukhari	Debasree	NA	Negative	26.02	Maybe	NA	Negative	NA	Negative	29.71	Negative	NA	Negative	NA	Negative	32.365	Negative	NA	Negative	NA	Negative	31.17	Negative	NA	Negative	15.29	Positive	NA	Negative	NA	Negative	28.085	Negative	NA	Negative	NA	Negative	NA	Negative	NA	Negative	NA	NonDetect	NA
25	M093002	2015-09-30 04:00:28+00:00	2015-10-01 07:30:25+00:00	Netrakona	Tiasree	Saidpur	NA	Negative	NA	Negative	NA	Negative	NA	Negative	31.24	Negative	NA	Negative	NA	Negative	NA	Negative	NA	Negative	NA	Negative	NA	Negative	NA	Negative	18.825	Positive	NA	Negative	NA	Negative	NA	Negative	NA	Negative	NA	Negative	NA	Negative	NA	Negative	NA	NonDetect	NA
26	M093003	2015-09-30 04:08:34+00:00	2015-09-30 13:30:59+00:00	Netrakona	Madan	Uchitpur	NA	NA	NA	NA	NA	NA	NA	NA	NA	NA	NA	NA	NA	NA	NA	NA	NA	NA	NA	NA	NA	NA	NA	NA	NA	NA	NA	NA	NA	NA	NA	NA	NA	NA	NA	NA	NA	NA	NA	NA	NA	NA	NA
27	M093004	2015-09-30 10:00:20+00:00	2015-10-01 08:30:25+00:00	Netrakona	Madan	Barburi	NA	Negative	NA	Negative	NA	Negative	NA	Negative	NA	Negative	NA	Negative	NA	Negative	NA	Negative	NA	Negative	NA	Negative	32.4	Negative	NA	Negative	12.495	Positive	NA	Negative	NA	Negative	NA	Negative	NA	Negative	15.385	Positive	NA	Negative	NA	Negative	NA	NA	33.54
28	M093005	2015-09-30 11:20:47+00:00	2015-10-01 08:45:24+00:00	Netrakona	Tiasree	Basta	NA	Negative	NA	Negative	NA	Negative	NA	Negative	NA	Negative	NA	Negative	NA	Negative	NA	Negative	NA	Negative	NA	Negative	NA	Negative	28.1	Negative	14.97	Positive	NA	Negative	NA	Negative	NA	Negative	NA	Negative	NA	Negative	NA	Negative	NA	Negative	20.38	Positive	32.92
29	M093006	2015-09-30 14:00:42+00:00	2015-09-30 19:15:29+00:00	Netrakona	Duaz	Sreepur Charigatia	NA	Negative	NA	Negative	NA	Negative	NA	Negative	32.555	Negative	NA	Negative	28.74	Negative	NA	Negative	NA	Negative	NA	Negative	NA	Negative	NA	Negative	13.885	Positive	NA	Negative	NA	Negative	NA	Negative	NA	Negative	27.725	Maybe	NA	Negative	NA	Negative	NA	NonDetect	NA
30	M100101	2015-10-01 04:00:00+00:00	2015-10-01 12:23:38+00:00	Netrakona	Gobindasree	Gobindasree	NA	Negative	NA	Negative	NA	Negative	NA	Negative	28.95	Negative	NA	Negative	27.635	Maybe	31.615	Negative	NA	Negative	NA	Negative	NA	Negative	NA	Negative	12.63	Positive	NA	Negative	32.65	Negative	NA	Negative	NA	Negative	21.155	Positive	NA	Negative	NA	Negative	NA	NonDetect	33.205
31	M100102	2015-10-01 08:40:55+00:00	2015-10-01 09:30:19+00:00	Netrakona	Sukhari	Narapatikhila	NA	NA	NA	NA	NA	NA	NA	NA	NA	NA	NA	NA	NA	NA	NA	NA	NA	NA	NA	NA	NA	NA	NA	NA	NA	NA	NA	NA	NA	NA	NA	NA	NA	NA	NA	NA	NA	NA	NA	NA	NA	NA	NA
32	M100103	2015-10-01 08:50:01+00:00	2015-10-04 03:00:48+00:00	Netrakona	Kaitail	Durgasram	NA	Negative	NA	Negative	NA	Negative	NA	Negative	31.39	Negative	NA	Negative	NA	Negative	NA	Negative	NA	Negative	NA	Negative	NA	Negative	NA	Negative	14.9	Positive	NA	Negative	NA	Negative	NA	Negative	NA	Negative	NA	Negative	NA	Negative	NA	Negative	23.525	Positive	NA
33	M100104	2015-10-01 10:20:23+00:00	2015-10-03 10:30:56+00:00	Netrakona	Madan	Parashkhila	NA	Negative	NA	Negative	NA	Negative	NA	Negative	NA	Negative	NA	Negative	28.185	Negative	NA	Negative	NA	Negative	NA	Negative	NA	Negative	NA	Negative	17.145	Positive	NA	Negative	NA	Negative	NA	Negative	NA	Negative	NA	Negative	NA	Negative	NA	Negative	NA	NonDetect	NA
34	M100201	2015-10-02 09:40:57+00:00	2015-10-03 14:30:29+00:00	Netrakona	Madan	Kuliati (Nasirpur)	NA	Negative	NA	Negative	NA	Negative	NA	Negative	NA	Negative	NA	Negative	26.98	Maybe	NA	Negative	NA	Negative	NA	Negative	29.395	Negative	NA	Negative	16.08	Positive	NA	Negative	NA	Negative	NA	Negative	NA	Negative	NA	Negative	NA	Negative	33.38	Negative	NA	NonDetect	NA
35	M100202	2015-10-02 05:10:23+00:00	2015-10-02 09:40:47+00:00	Netrakona	Madan	Kapasatia	NA	Negative	NA	Negative	NA	Negative	NA	Negative	NA	Negative	NA	Negative	NA	Negative	NA	Negative	NA	Negative	NA	Negative	NA	Negative	NA	Negative	26.075	Maybe	NA	Negative	NA	Negative	NA	Negative	NA	Negative	NA	Negative	NA	Negative	25.215	Positive	NA	NonDetect	29.385
36	M100203	2015-10-02 08:45:13+00:00	2015-10-04 07:30:32+00:00	Netrakona	Madan	Madan	25	Positive	NA	Negative	NA	Negative	NA	Negative	29.89	Negative	NA	Negative	29.04	Negative	NA	Negative	33.13	Negative	NA	Negative	28.045	Negative	NA	Negative	15.45	Positive	NA	Negative	NA	Negative	NA	Negative	27.38	Maybe	NA	Negative	NA	Negative	27.99	Maybe	NA	NonDetect	27.89
37	M100204	2015-10-02 12:55:49+00:00	2015-10-03 10:00:03+00:00	Netrakona	Chakua	Lepsia	NA	Negative	NA	Negative	NA	Negative	NA	Negative	NA	Negative	26.685	Maybe	26.08	Maybe	NA	Negative	NA	Negative	NA	Negative	NA	Negative	NA	Negative	9.085	Positive	NA	Negative	NA	Negative	34.22	Negative	NA	Negative	12.875	Positive	NA	Negative	NA	Negative	25.66	Positive	29.05
38	M100205	2015-10-02 12:50:02+00:00	2015-10-03 10:00:27+00:00	Netrakona	Chakua	Lepsia	NA	Negative	NA	Negative	NA	Negative	NA	Negative	NA	Negative	18.895	Positive	NA	Negative	NA	Negative	34	Negative	NA	Negative	30.525	Negative	NA	Negative	12.355	Positive	NA	Negative	NA	Negative	NA	Negative	NA	Negative	NA	Negative	NA	Negative	NA	Negative	25.735	Positive	33.7
39	M100301	2015-10-03 03:25:01+00:00	2015-10-04 07:30:18+00:00	Netrakona	Gobindasree	Gobindasree	NA	Negative	NA	Negative	NA	Negative	NA	Negative	NA	Negative	NA	Negative	NA	Negative	33.86	Negative	NA	Negative	NA	Negative	33.13	Negative	NA	Negative	15.28	Positive	NA	Negative	NA	Negative	NA	Negative	NA	Negative	24.36	Positive	NA	Negative	NA	Negative	NA	NonDetect	NA
40	M100302	2015-10-03 14:00:31+00:00	2015-10-04 03:05:44+00:00	Netrakona	Madan	Madan	NA	Negative	NA	Negative	NA	Negative	NA	Negative	NA	Negative	NA	Negative	26.06	Maybe	NA	Negative	NA	Negative	NA	Negative	NA	Negative	NA	Negative	20.46	Positive	NA	Negative	NA	Negative	NA	Negative	NA	Negative	NA	Negative	NA	Negative	NA	Negative	NA	NonDetect	29.025
41	M100303	2015-10-03 04:10:50+00:00	2015-10-04 11:30:04+00:00	Netrakona	Kaitail	Keshjani	NA	Negative	NA	Negative	NA	Negative	NA	Negative	NA	Negative	NA	Negative	NA	Negative	NA	Negative	NA	Negative	NA	Negative	27.84	Maybe	NA	Negative	11.365	Positive	NA	Negative	NA	Negative	NA	Negative	NA	Negative	NA	Negative	NA	Negative	NA	Negative	NA	NonDetect	31.105
42	M100304	2015-10-03 06:00:04+00:00	2015-10-05 03:00:10+00:00	Netrakona	Gobindasree	Padamsree	NA	Negative	NA	Negative	NA	Negative	NA	Negative	30.25	Negative	NA	Negative	26.7	Maybe	34.38	Negative	NA	Negative	NA	Negative	NA	Negative	NA	Negative	16.46	Positive	NA	Negative	NA	Negative	27.22	Maybe	NA	Negative	22.605	Positive	NA	Negative	NA	Negative	NA	NonDetect	30.41
43	M100305	2015-10-03 09:20:55+00:00	2015-10-04 03:00:48+00:00	Netrakona	Chandgaon	Hanskuri	NA	Negative	NA	Negative	NA	Negative	NA	Negative	26.96	Maybe	NA	Negative	29.36	Negative	NA	Negative	NA	Negative	NA	Negative	34.29	Negative	NA	Negative	14.42	Positive	NA	Negative	NA	Negative	NA	Negative	NA	Negative	NA	Negative	NA	Negative	NA	Negative	NA	NonDetect	NA
44	M100401	2015-10-04 05:00:14+00:00	2015-10-05 03:30:43+00:00	Netrakona	Chandgaon	Purbapara	NA	Negative	NA	Negative	NA	Negative	NA	Negative	NA	Negative	NA	Negative	29.82	Negative	NA	Negative	NA	Negative	NA	Negative	NA	Negative	NA	Negative	15.985	Positive	NA	Negative	NA	Negative	NA	Negative	NA	Negative	26.535	Maybe	NA	Negative	NA	Negative	NA	NonDetect	33.97
45	M100402	2015-10-04 06:30:02+00:00	2015-10-05 06:30:53+00:00	Netrakona	Madan	Madan	NA	Negative	NA	Negative	NA	Negative	NA	Negative	NA	Negative	NA	Negative	27.11	Maybe	NA	Negative	NA	Negative	NA	Negative	NA	Negative	NA	Negative	13.52	Positive	NA	Negative	NA	Negative	NA	Negative	NA	Negative	16.45	Positive	NA	Negative	NA	Negative	NA	NonDetect	34.025
46	M100501	2015-10-05 15:20:51+00:00	2015-10-08 02:00:48+00:00	Netrakona	Chandgaon	Ratnapur	NA	NA	NA	NA	NA	NA	NA	NA	NA	NA	NA	NA	NA	NA	NA	NA	NA	NA	NA	NA	NA	NA	NA	NA	NA	NA	NA	NA	NA	NA	NA	NA	NA	NA	NA	NA	NA	NA	NA	NA	NA	NA	NA
47	M100502	2015-10-05 03:30:50+00:00	2015-10-06 03:00:10+00:00	Netrakona	Fatehpur	Bantiosree	NA	Negative	NA	Negative	NA	Negative	NA	Negative	33.18	Negative	NA	Negative	NA	Negative	NA	Negative	NA	Negative	NA	Negative	NA	Negative	NA	Negative	18.3	Positive	NA	Negative	NA	Negative	NA	Negative	NA	Negative	NA	Negative	NA	Negative	NA	Negative	27.075	Maybe	32.035
48	M100601	2015-10-06 01:00:27+00:00	2015-10-06 14:00:38+00:00	Netrakona	Sukhari	Gopalasram Madhuakhali	NA	Negative	NA	Negative	NA	Negative	NA	Negative	22.16	Positive	NA	Negative	27.2	Maybe	NA	Negative	NA	Negative	NA	Negative	NA	Negative	NA	Negative	10.66	Positive	NA	Negative	NA	Negative	25.78	Positive	16.62	Positive	26.83	Maybe	NA	Negative	NA	Negative	24.25	Positive	30.97
49	M100602	2015-10-06 07:40:12+00:00	2015-10-06 00:00:06+00:00	Netrakona	Kaitail	Barabari	NA	Negative	NA	Negative	NA	Negative	NA	Negative	28.32	Negative	NA	Negative	NA	Negative	NA	Negative	NA	Negative	NA	Negative	33.67	Negative	NA	Negative	16.575	Positive	NA	Negative	NA	Negative	NA	Negative	22.425	Positive	NA	Negative	NA	Negative	23	Positive	28.435	Negative	28.77
50	M100701	2015-10-06 18:30:05+00:00	2015-10-08 12:00:25+00:00	Netrakona	Nayekpur	Nayekpur Purbapara	NA	Negative	NA	Negative	NA	Negative	NA	Negative	NA	Negative	NA	Negative	NA	Negative	NA	Negative	NA	Negative	NA	Negative	NA	Negative	NA	Negative	19.98	Positive	NA	Negative	NA	Negative	NA	Negative	NA	Negative	NA	Negative	NA	Negative	NA	Negative	NA	NonDetect	31.31
51	M100702	2015-10-07 03:40:42+00:00	2015-10-10 04:30:08+00:00	Netrakona	Madan	Ganganagar	NA	Negative	NA	Negative	NA	Negative	NA	Negative	29.7	Negative	NA	Negative	NA	Negative	NA	Negative	NA	Negative	NA	Negative	27.465	Maybe	33.47	Negative	16.085	Positive	NA	Negative	NA	Negative	25.315	Positive	24.29	Positive	NA	Negative	NA	Negative	NA	Negative	NA	NonDetect	NA
52	M100703	2015-10-07 17:25:26+00:00	2015-10-09 04:00:32+00:00	Netrakona	Sukhari	Debasree	NA	Negative	NA	Negative	NA	Negative	NA	Negative	30.58	Negative	NA	Negative	25.175	Positive	NA	Negative	NA	Negative	NA	Negative	NA	Negative	NA	Negative	17.065	Positive	NA	Negative	NA	Negative	NA	Negative	NA	Negative	NA	Negative	NA	Negative	31.79	Negative	NA	NonDetect	31.95
53	M100801	2015-10-08 00:15:34+00:00	2015-10-08 09:50:49+00:00	Netrakona	Madan	Madan	NA	Negative	NA	Negative	NA	Negative	NA	Negative	NA	Negative	26.85	Maybe	26.22	Maybe	NA	Negative	NA	Negative	NA	Negative	NA	Negative	NA	Negative	19.115	Positive	NA	Negative	NA	Negative	NA	Negative	NA	Negative	NA	Negative	NA	Negative	NA	Negative	NA	NonDetect	NA
54	M100802	2015-10-08 01:00:22+00:00	2015-10-09 09:15:21+00:00	Netrakona	Madan	Madan	NA	Negative	NA	Negative	NA	Negative	NA	Negative	31.86	Negative	NA	Negative	25.16	Positive	NA	Negative	NA	Negative	NA	Negative	29.75	Negative	NA	Negative	10.555	Positive	NA	Negative	NA	Negative	NA	Negative	NA	Negative	28.57	Negative	NA	Negative	NA	Negative	NA	NonDetect	NA
55	M100803	2015-10-08 01:40:32+00:00	2015-10-09 13:00:14+00:00	Netrakona	Madan	Kapasatia	27.79	Maybe	NA	Negative	NA	Negative	NA	Negative	27.74	Maybe	NA	Negative	26.39	Maybe	NA	Negative	NA	Negative	NA	Negative	NA	Negative	NA	Negative	13.365	Positive	NA	Negative	NA	Negative	NA	Negative	NA	Negative	NA	Negative	NA	Negative	NA	Negative	NA	NonDetect	NA
56	M100804	2015-10-08 05:20:09+00:00	2015-10-09 04:00:35+00:00	Netrakona	Sukhari	Gopalasram Madhuakhali	NA	Negative	NA	Negative	NA	Negative	NA	Negative	NA	Negative	NA	Negative	27.42	Maybe	NA	Negative	NA	Negative	NA	Negative	NA	Negative	NA	Negative	15.555	Positive	NA	Negative	34.5	Negative	NA	Negative	NA	Negative	NA	Negative	NA	Negative	NA	Negative	24.09	Positive	34.09
57	M100805	2015-10-08 08:20:45+00:00	2015-10-09 11:00:57+00:00	Netrakona	Madan	Madan	NA	Negative	NA	Negative	NA	Negative	NA	Negative	NA	Negative	NA	Negative	28.17	Negative	27.73	Maybe	NA	Negative	NA	Negative	26.93	Maybe	NA	Negative	9.24	Positive	NA	Negative	NA	Negative	NA	Negative	26.63	Maybe	16.86	Positive	NA	Negative	NA	Negative	NA	NonDetect	30.43
58	M100806	2015-10-08 08:50:19+00:00	2015-10-10 02:00:19+00:00	Netrakona	Sukhari	Debasree	NA	Negative	NA	Negative	NA	Negative	NA	Negative	31.435	Negative	NA	Negative	NA	Negative	NA	Negative	NA	Negative	NA	Negative	NA	Negative	NA	Negative	17.7	Positive	NA	Negative	NA	Negative	NA	Negative	NA	Negative	NA	Negative	NA	Negative	NA	Negative	NA	NonDetect	NA
59	M100807	2015-10-08 10:20:06+00:00	2015-10-09 05:00:10+00:00	Netrakona	Maghan	Ghatua	NA	Negative	NA	Negative	NA	Negative	NA	Negative	NA	Negative	NA	Negative	26.625	Maybe	NA	Negative	NA	Negative	NA	Negative	NA	Negative	NA	Negative	15.895	Positive	NA	Negative	NA	Negative	NA	Negative	NA	Negative	19.235	Positive	NA	Negative	NA	Negative	NA	NonDetect	NA
60	M100808	2015-10-08 10:20:45+00:00	2015-10-09 03:00:10+00:00	Netrakona	Madan	Uchitpur	NA	Negative	NA	Negative	NA	Negative	NA	Negative	NA	Negative	NA	Negative	NA	Negative	28.025	Negative	NA	Negative	NA	Negative	28.585	Negative	NA	Negative	12.315	Positive	NA	Negative	NA	Negative	NA	Negative	16.55	Positive	NA	Negative	NA	Negative	32.31	Negative	NA	NonDetect	NA
61	M100901	2015-10-09 02:15:57+00:00	2015-10-10 06:00:34+00:00	Netrakona	Sukhari	Sukhari	NA	Negative	NA	Negative	NA	Negative	NA	Negative	27.3	Maybe	NA	Negative	NA	Negative	NA	Negative	NA	Negative	NA	Negative	33.86	Negative	NA	Negative	16.545	Positive	NA	Negative	NA	Negative	NA	Negative	18.065	Positive	NA	Negative	NA	Negative	NA	Negative	NA	NonDetect	NA
62	M100902	2015-10-09 02:50:08+00:00	2015-10-09 14:00:50+00:00	Netrakona	Madan	Barburi	NA	Negative	NA	Negative	NA	Negative	NA	Negative	26.93	Maybe	NA	Negative	NA	Negative	NA	Negative	NA	Negative	NA	Negative	25.515	Positive	NA	Negative	16.58	Positive	NA	Negative	NA	Negative	NA	Negative	17.92	Positive	NA	Negative	NA	Negative	NA	Negative	NA	NonDetect	NA
63	M101001	2015-10-10 01:00:59+00:00	2015-10-11 04:00:39+00:00	Netrakona	Madan	Madan	NA	Negative	NA	Negative	NA	Negative	NA	Negative	29.005	Negative	NA	Negative	32.79	Negative	NA	Negative	NA	Negative	NA	Negative	NA	Negative	NA	Negative	12.97	Positive	NA	Negative	NA	Negative	NA	Negative	27.02	Maybe	NA	Negative	NA	Negative	18.745	Positive	NA	NonDetect	29.695
64	M101002	2015-10-10 02:15:10+00:00	2015-10-11 04:10:55+00:00	Netrakona	Madan	Madan	NA	Negative	NA	Negative	NA	Negative	NA	Negative	32.595	Negative	NA	Negative	28.82	Negative	25.73	Positive	NA	Negative	34.41	Negative	NA	Negative	NA	Negative	17.64	Positive	NA	Negative	NA	Negative	NA	Negative	NA	Negative	NA	Negative	NA	Negative	NA	Negative	NA	NonDetect	NA
65	M101003	2015-10-10 10:20:47+00:00	2015-10-12 09:30:22+00:00	Netrakona	Madan	Madan	NA	Negative	NA	Negative	NA	Negative	NA	Negative	NA	Negative	NA	Negative	NA	Negative	NA	Negative	NA	Negative	NA	Negative	NA	Negative	NA	Negative	19.83	Positive	NA	Negative	NA	Negative	NA	Negative	NA	Negative	NA	Negative	NA	Negative	20.7	Positive	NA	NonDetect	30.355
66	M101004	2015-10-10 09:00:26+00:00	2015-10-11 05:30:27+00:00	Netrakona	Nayekpur	Alamsree	NA	Negative	NA	Negative	NA	Negative	NA	Negative	34.6	Negative	NA	Negative	26.22	Maybe	NA	Negative	NA	Negative	NA	Negative	NA	Negative	28.115	Negative	18.51	Positive	NA	Negative	NA	Negative	NA	Negative	NA	Negative	21.41	Positive	NA	Negative	NA	Negative	23.615	Positive	34.025
67	M101101	2015-10-11 13:47:55+00:00	2015-10-13 10:10:40+00:00	Netrakona	Nayekpur	Alamsree	NA	Negative	NA	Negative	NA	Negative	NA	Negative	NA	Negative	NA	Negative	NA	Negative	NA	Negative	NA	Negative	NA	Negative	NA	Negative	NA	Negative	17.94	Positive	NA	Negative	NA	Negative	NA	Negative	NA	Negative	NA	Negative	NA	Negative	NA	Negative	NA	NonDetect	30.31
68	M101201	2015-10-12 03:20:18+00:00	2015-10-14 11:20:58+00:00	Netrakona	Madan	Parashkhila	NA	Negative	NA	Negative	NA	Negative	NA	Negative	32.85	Negative	NA	Negative	26.38	Maybe	NA	Negative	NA	Negative	NA	Negative	34.165	Negative	NA	Negative	14.565	Positive	NA	Negative	NA	Negative	NA	Negative	NA	Negative	NA	Negative	NA	Negative	NA	Negative	NA	NonDetect	NA
69	M101202	2015-10-12 04:30:52+00:00	2015-10-12 09:51:20+00:00	Netrakona	Madan	Madan	NA	Negative	NA	Negative	NA	Negative	33.54	Negative	32.075	Negative	NA	Negative	NA	Negative	34.21	Negative	NA	Negative	NA	Negative	34.85	Negative	NA	Negative	16.875	Positive	NA	Negative	NA	Negative	NA	Negative	NA	Negative	NA	Negative	NA	Negative	NA	Negative	NA	NonDetect	NA
70	M101203	2015-10-12 07:15:36+00:00	2015-10-13 10:40:24+00:00	Netrakona	Madan	Barikandi	NA	Negative	NA	Negative	NA	Negative	NA	Negative	32.205	Negative	NA	Negative	NA	Negative	34.99	Negative	NA	Negative	NA	Negative	29.6	Negative	NA	Negative	12.545	Positive	NA	Negative	NA	Negative	NA	Negative	NA	Negative	21.175	Positive	NA	Negative	NA	Negative	NA	NonDetect	NA
71	M101301	2015-10-13 01:00:38+00:00	2015-10-14 06:10:07+00:00	Netrakona	Nayekpur	Alamsree	NA	Negative	NA	Negative	NA	Negative	NA	Negative	NA	Negative	NA	Negative	NA	Negative	NA	Negative	NA	Negative	NA	Negative	NA	Negative	NA	Negative	14.12	Positive	NA	Negative	NA	Negative	NA	Negative	NA	Negative	27.335	Maybe	NA	Negative	NA	Negative	21.805	Positive	32.245
72	M101302	2015-10-13 04:50:28+00:00	2015-10-15 09:00:02+00:00	Netrakona	Tiasree	Kutarikona	NA	Negative	NA	Negative	NA	Negative	NA	Negative	NA	Negative	NA	Negative	NA	Negative	NA	Negative	NA	Negative	NA	Negative	34.54	Negative	NA	Negative	14.87	Positive	34.74	Negative	NA	Negative	NA	Negative	NA	Negative	NA	Negative	NA	Negative	33.28	Negative	26.25	Maybe	29.41
73	M101303	2015-10-13 06:50:23+00:00	2015-10-14 11:30:42+00:00	Netrakona	Noapara	Pachhar	NA	Negative	NA	Negative	NA	Negative	NA	Negative	NA	Negative	NA	Negative	NA	Negative	NA	Negative	33.16	Negative	NA	Negative	NA	Negative	NA	Negative	13.405	Positive	NA	Negative	NA	Negative	NA	Negative	NA	Negative	NA	Negative	NA	Negative	34.24	Negative	NA	NonDetect	34.58
74	M101304	2015-10-13 09:00:16+00:00	2015-10-14 16:30:44+00:00	Netrakona	Madan	Madan	NA	Negative	NA	Negative	NA	Negative	NA	Negative	26.88	Maybe	27.75	Maybe	28.03	Negative	33.895	Negative	NA	Negative	NA	Negative	NA	Negative	NA	Negative	12.535	Positive	NA	Negative	NA	Negative	NA	Negative	NA	Negative	15.675	Positive	NA	Negative	30.34	Negative	NA	NonDetect	NA
75	M101305	2015-10-13 09:40:54+00:00	2015-10-14 08:00:55+00:00	Netrakona	Sukhari	Sukhari	NA	Negative	NA	Negative	NA	Negative	NA	Negative	32.03	Negative	NA	Negative	27.87	Maybe	NA	Negative	NA	Negative	NA	Negative	NA	Negative	NA	Negative	18.38	Positive	NA	Negative	NA	Negative	NA	Negative	NA	Negative	NA	Negative	29.93	Negative	NA	Negative	NA	NonDetect	NA
76	M101306	2015-10-13 14:20:13+00:00	2015-10-14 10:00:10+00:00	Netrakona	Madan	Madan	NA	Negative	NA	Negative	NA	Negative	NA	Negative	26.965	Maybe	NA	Negative	27.065	Maybe	NA	Negative	NA	Negative	NA	Negative	31.26	Negative	28.26	Negative	12.7	Positive	NA	Negative	NA	Negative	NA	Negative	NA	Negative	15.78	Positive	NA	Negative	NA	Negative	28.46	Negative	31.225
77	M101401	2015-10-14 02:10:37+00:00	2015-10-15 07:00:01+00:00	Netrakona	Sukhari	Dharma Roy	NA	Negative	NA	Negative	NA	Negative	NA	Negative	32.23	Negative	NA	Negative	26.28	Maybe	NA	Negative	NA	Negative	NA	Negative	31.54	Negative	NA	Negative	14.18	Positive	NA	Negative	NA	Negative	20.075	Positive	NA	Negative	27.79	Maybe	NA	Negative	34.46	Negative	NA	NonDetect	NA
78	M101402	2015-10-14 05:00:14+00:00	2015-10-15 04:00:34+00:00	Netrakona	Sukhari	Sukhari	NA	Negative	NA	Negative	NA	Negative	NA	Negative	NA	Negative	NA	Negative	27.19	Maybe	NA	Negative	NA	Negative	NA	Negative	NA	Negative	NA	Negative	20.135	Positive	NA	Negative	NA	Negative	NA	Negative	NA	Negative	29.2	Negative	NA	Negative	NA	Negative	NA	NonDetect	33.98
79	M101403	2015-10-14 02:10:25+00:00	2015-10-15 08:00:12+00:00	Netrakona	Sukhari	Kahetura	NA	Negative	NA	Negative	NA	Negative	NA	Negative	31.035	Negative	NA	Negative	NA	Negative	34.44	Negative	NA	Negative	NA	Negative	NA	Negative	NA	Negative	10.32	Positive	NA	Negative	NA	Negative	NA	Negative	33.275	Negative	NA	Negative	NA	Negative	NA	Negative	NA	NonDetect	32.29
80	M101404	2015-10-14 07:00:43+00:00	2015-10-15 13:30:06+00:00	Netrakona	Kaitail	Barabari	NA	Negative	NA	Negative	NA	Negative	NA	Negative	30.415	Negative	NA	Negative	25.41	Positive	NA	Negative	NA	Negative	NA	Negative	NA	Negative	NA	Negative	16.13	Positive	NA	Negative	NA	Negative	NA	Negative	NA	Negative	28.15	Negative	NA	Negative	NA	Negative	NA	NonDetect	32.86
81	M101405	2015-10-14 09:40:18+00:00	2015-10-15 14:20:23+00:00	Netrakona	Nayekpur	Nayekpur Purbapara	NA	Negative	NA	Negative	NA	Negative	NA	Negative	30.405	Negative	NA	Negative	26.42	Maybe	NA	Negative	NA	Negative	NA	Negative	32.83	Negative	NA	Negative	12.455	Positive	NA	Negative	NA	Negative	NA	Negative	NA	Negative	NA	Negative	NA	Negative	NA	Negative	NA	NonDetect	NA
82	M101406	2015-10-14 12:30:01+00:00	2015-10-15 06:00:15+00:00	Netrakona	Nayekpur	Rupasram	NA	Negative	NA	Negative	NA	Negative	NA	Negative	NA	Negative	NA	Negative	25.69	Positive	NA	Negative	NA	Negative	NA	Negative	NA	Negative	NA	Negative	20.715	Positive	NA	Negative	NA	Negative	NA	Negative	NA	Negative	NA	Negative	NA	Negative	NA	Negative	NA	NonDetect	NA
83	M101407	2015-10-14 14:00:14+00:00	2015-10-15 11:30:36+00:00	Netrakona	Madan	Barikandi	NA	Negative	NA	Negative	NA	Negative	NA	Negative	28.995	Negative	NA	Negative	26.27	Maybe	34.5	Negative	NA	Negative	NA	Negative	33.595	Negative	NA	Negative	12.87	Positive	NA	Negative	NA	Negative	27.25	Maybe	NA	Negative	22.525	Positive	NA	Negative	NA	Negative	20.665	Positive	28.94
84	M101501	2015-10-15 01:15:07+00:00	2015-10-16 07:00:35+00:00	Netrakona	Madan	Madan	NA	Negative	NA	Negative	NA	Negative	NA	Negative	NA	Negative	NA	Negative	26.36	Maybe	NA	Negative	NA	Negative	NA	Negative	NA	Negative	NA	Negative	18.165	Positive	NA	Negative	NA	Negative	NA	Negative	NA	Negative	NA	Negative	NA	Negative	NA	Negative	NA	NonDetect	NA
85	M101502	2015-10-15 01:20:30+00:00	2015-10-17 05:00:32+00:00	Netrakona	Nayekpur	Barati	NA	Negative	NA	Negative	NA	Negative	NA	Negative	NA	Negative	NA	Negative	26.2	Maybe	NA	Negative	NA	Negative	NA	Negative	NA	Negative	NA	Negative	18.65	Positive	NA	Negative	NA	Negative	NA	Negative	NA	Negative	NA	Negative	NA	Negative	NA	Negative	23.505	Positive	NA
86	M101503	2015-10-15 03:35:23+00:00	2015-10-17 06:00:28+00:00	Netrakona	Nayekpur	Alamsree	NA	Negative	NA	Negative	NA	Negative	NA	Negative	NA	Negative	NA	Negative	26.38	Maybe	NA	Negative	NA	Negative	NA	Negative	NA	Negative	NA	Negative	21.565	Positive	NA	Negative	NA	Negative	NA	Negative	NA	Negative	NA	Negative	NA	Negative	NA	Negative	NA	NonDetect	NA
87	M101505	2015-10-15 07:10:53+00:00	2015-10-15 10:30:13+00:00	Netrakona	Nayekpur	Barati	NA	Negative	NA	Negative	NA	Negative	NA	Negative	29.765	Negative	NA	Negative	24.43	Positive	NA	Negative	NA	Negative	NA	Negative	34.9	Negative	NA	Negative	14.89	Positive	NA	Negative	NA	Negative	NA	Negative	NA	Negative	NA	Negative	NA	Negative	NA	Negative	NA	NonDetect	NA
88	M101506	2015-10-15 07:45:04+00:00	2015-10-17 06:30:48+00:00	Netrakona	Maghan	Ranihala	NA	Negative	NA	Negative	NA	Negative	NA	Negative	NA	Negative	NA	Negative	26.45	Maybe	NA	Negative	28.73	Negative	NA	Negative	NA	Negative	NA	Negative	22.96	Positive	NA	Negative	NA	Negative	NA	Negative	NA	Negative	28.14	Negative	26.225	Maybe	NA	Negative	NA	NonDetect	NA
89	M101507	2015-10-15 08:40:20+00:00	2015-10-17 05:00:10+00:00	Netrakona	Tiasree	Baghmara	NA	Negative	NA	Negative	NA	Negative	NA	Negative	29.955	Negative	NA	Negative	26.72	Maybe	NA	Negative	NA	Negative	NA	Negative	34.5	Negative	NA	Negative	14.795	Positive	NA	Negative	NA	Negative	NA	Negative	NA	Negative	NA	Negative	NA	Negative	NA	Negative	24.78	Positive	NA
90	M101601	2015-10-16 02:00:19+00:00	2015-10-17 04:50:39+00:00	Netrakona	Madan	Kaikuria	NA	Negative	NA	Negative	NA	Negative	NA	Negative	NA	Negative	NA	Negative	25.89	Positive	NA	Negative	NA	Negative	NA	Negative	NA	Negative	NA	Negative	15.43	Positive	NA	Negative	NA	Negative	NA	Negative	NA	Negative	NA	Negative	NA	Negative	NA	Negative	NA	NonDetect	NA
91	M101602	2015-10-09 03:30:37+00:00	2015-10-17 04:30:08+00:00	Netrakona	Noapara	Pachhar	NA	Negative	NA	Negative	NA	Negative	NA	Negative	32.705	Negative	NA	Negative	27.26	Maybe	NA	Negative	NA	Negative	NA	Negative	NA	Negative	NA	Negative	16.79	Positive	NA	Negative	NA	Negative	NA	Negative	NA	Negative	NA	Negative	NA	Negative	NA	Negative	NA	NonDetect	NA
92	M101603	2015-10-16 03:45:15+00:00	2015-10-17 11:10:27+00:00	Netrakona	Madan	Madan	NA	Negative	NA	Negative	NA	Negative	NA	Negative	27.69	Maybe	NA	Negative	29.67	Negative	NA	Negative	NA	Negative	NA	Negative	NA	Negative	NA	Negative	12.855	Positive	NA	Negative	NA	Negative	NA	Negative	NA	Negative	NA	Negative	NA	Negative	NA	Negative	NA	NonDetect	NA
93	M101701	2015-09-16 20:30:47+00:00	2015-09-18 04:30:02+00:00	Netrakona	Madan	Kapasatia	NA	Negative	NA	Negative	NA	Negative	NA	Negative	31.15	Negative	NA	Negative	25.42	Positive	NA	Negative	NA	Negative	NA	Negative	29.98	Negative	25.925	Positive	12.73	Positive	NA	Negative	NA	Negative	NA	Negative	NA	Negative	21.775	Positive	NA	Negative	NA	Negative	23.21	Positive	NA
94	M101801	2015-10-17 20:20:53+00:00	2015-10-19 03:00:15+00:00	Netrakona	Madan	Madan	NA	Negative	NA	Negative	NA	Negative	NA	Negative	30.52	Negative	NA	Negative	27.01	Maybe	NA	Negative	NA	Negative	NA	Negative	NA	Negative	NA	Negative	14.74	Positive	NA	Negative	NA	Negative	NA	Negative	NA	Negative	NA	Negative	NA	Negative	NA	Negative	NA	NonDetect	NA
95	M101802	2015-10-18 02:15:33+00:00	2015-10-19 10:30:37+00:00	Netrakona	Madan	Madan	NA	Negative	NA	Negative	NA	Negative	NA	Negative	32.2	Negative	NA	Negative	25.43	Positive	NA	Negative	NA	Negative	NA	Negative	NA	Negative	NA	Negative	14.685	Positive	NA	Negative	NA	Negative	NA	Negative	NA	Negative	NA	Negative	26.45	Maybe	NA	Negative	NA	NonDetect	NA
96	M101803	2015-10-18 02:30:08+00:00	2015-10-19 04:00:19+00:00	Netrakona	Madan	Madan	NA	Negative	NA	Negative	NA	Negative	NA	Negative	NA	Negative	NA	Negative	27.23	Maybe	NA	Negative	NA	Negative	NA	Negative	34.95	Negative	NA	Negative	14.235	Positive	NA	Negative	NA	Negative	NA	Negative	NA	Negative	NA	Negative	NA	Negative	NA	Negative	NA	NonDetect	NA
97	M101804	2015-10-18 02:55:38+00:00	2015-10-19 10:30:55+00:00	Netrakona	Kaitail	Kaitail	NA	Negative	NA	Negative	NA	Negative	NA	Negative	27.53	Maybe	NA	Negative	26.06	Maybe	NA	Negative	NA	Negative	NA	Negative	NA	Negative	NA	Negative	14.645	Positive	NA	Negative	NA	Negative	NA	Negative	NA	Negative	NA	Negative	NA	Negative	NA	Negative	NA	NonDetect	NA
98	M101805	2015-10-18 11:18:27+00:00	2015-10-19 06:30:21+00:00	Netrakona	Maghan	Maghan	NA	Negative	NA	Negative	NA	Negative	NA	Negative	NA	Negative	NA	Negative	28.45	Negative	NA	Negative	NA	Negative	NA	Negative	NA	Negative	NA	Negative	20.49	Positive	NA	Negative	NA	Negative	NA	Negative	NA	Negative	NA	Negative	NA	Negative	NA	Negative	28.16	Negative	NA
99	M101806	2015-10-18 15:20:25+00:00	2015-10-19 01:30:55+00:00	Netrakona	Madan	Madan	NA	Negative	NA	Negative	NA	Negative	NA	Negative	NA	Negative	NA	Negative	28.9	Negative	33.48	Negative	NA	Negative	NA	Negative	27.795	Maybe	NA	Negative	9.82	Positive	NA	Negative	NA	Negative	NA	Negative	NA	Negative	NA	Negative	NA	Negative	NA	Negative	24.025	Positive	25.125
100	M101807	2015-10-18 05:40:12+00:00	2015-10-19 14:00:25+00:00	Netrakona	Madan	Madan	NA	Negative	NA	Negative	NA	Negative	NA	Negative	26.9	Maybe	NA	Negative	28.765	Negative	NA	Negative	NA	Negative	NA	Negative	33.705	Negative	NA	Negative	11.025	Positive	NA	Negative	NA	Negative	NA	Negative	NA	Negative	NA	Negative	NA	Negative	NA	Negative	17.41	Positive	32.3
101	M101808	2015-10-18 05:45:41+00:00	2015-10-19 08:30:40+00:00	Netrakona	Madan	Madan	NA	Negative	NA	Negative	NA	Negative	NA	Negative	34.69	Negative	NA	Negative	NA	Negative	34.215	Negative	NA	Negative	NA	Negative	31.4	Negative	31.555	Negative	11.94	Positive	NA	Negative	NA	Negative	NA	Negative	NA	Negative	NA	Negative	NA	Negative	NA	Negative	19.5	Positive	26.045
102	M101901	2015-10-19 02:00:35+00:00	2015-10-19 15:00:56+00:00	Netrakona	Kaitail	Joypasha	NA	Negative	NA	Negative	NA	Negative	NA	Negative	NA	Negative	NA	Negative	NA	Negative	31.775	Negative	NA	Negative	NA	Negative	24.595	Positive	NA	Negative	10.34	Positive	NA	Negative	NA	Negative	NA	Negative	NA	Negative	NA	Negative	26.755	Maybe	33.16	Negative	NA	NonDetect	27.645
103	M101902	2015-10-19 06:10:21+00:00	2015-10-20 03:00:08+00:00	Netrakona	Madan	Madan	NA	Negative	NA	Negative	NA	Negative	NA	Negative	NA	Negative	NA	Negative	NA	Negative	NA	Negative	NA	Negative	NA	Negative	29.09	Negative	NA	Negative	18.18	Positive	NA	Negative	29.08	Negative	NA	Negative	NA	Negative	NA	Negative	NA	Negative	NA	Negative	25.465	Positive	NA
104	M101903	2015-10-19 07:50:21+00:00	2015-10-20 07:00:22+00:00	Netrakona	Maghan	Ranihala	NA	Negative	NA	Negative	NA	Negative	NA	Negative	NA	Negative	NA	Negative	NA	Negative	NA	Negative	NA	Negative	NA	Negative	31.91	Negative	NA	Negative	12.28	Positive	NA	Negative	25.83	Positive	NA	Negative	NA	Negative	NA	Negative	NA	Negative	NA	Negative	27.045	Maybe	32.36
105	M101904	2015-10-19 10:35:53+00:00	2015-10-20 05:00:35+00:00	Netrakona	Madan	Madan	NA	Negative	NA	Negative	NA	Negative	NA	Negative	NA	Negative	NA	Negative	25.345	Positive	NA	Negative	NA	Negative	NA	Negative	NA	Negative	28.32	Negative	12.84	Positive	NA	Negative	NA	Negative	NA	Negative	NA	Negative	NA	Negative	NA	Negative	NA	Negative	NA	NonDetect	33.615
106	M101905	2015-10-19 11:40:16+00:00	2015-10-20 00:00:27+00:00	Netrakona	Kaitail	Kaitail	NA	Negative	NA	Negative	NA	Negative	NA	Negative	NA	Negative	NA	Negative	NA	Negative	NA	Negative	NA	Negative	NA	Negative	31.805	Negative	NA	Negative	12.735	Positive	NA	Negative	NA	Negative	NA	Negative	NA	Negative	NA	Negative	NA	Negative	NA	Negative	NA	NonDetect	30.765
107	M102001	2015-10-20 05:15:22+00:00	2015-10-21 02:00:50+00:00	Netrakona	Kaitail	Kaitail	NA	Negative	NA	Negative	NA	Negative	NA	Negative	32.22	Negative	NA	Negative	NA	Negative	NA	Negative	NA	Negative	NA	Negative	NA	Negative	NA	Negative	17.01	Positive	NA	Negative	NA	Negative	NA	Negative	25.85	Positive	23.72	Positive	NA	Negative	NA	Negative	NA	NonDetect	34.58
108	M102501	2015-10-24 19:30:38+00:00	2015-10-27 07:30:27+00:00	Netrakona	Nayekpur	Nayekpur Purbapara	NA	Negative	NA	Negative	NA	Negative	NA	Negative	NA	Negative	NA	Negative	NA	Negative	NA	Negative	NA	Negative	NA	Negative	29.505	Negative	NA	Negative	14.95	Positive	NA	Negative	NA	Negative	NA	Negative	NA	Negative	NA	Negative	NA	Negative	27.6	Maybe	NA	NonDetect	NA
109	M102601	2015-10-26 03:10:49+00:00	2015-10-26 15:00:47+00:00	Netrakona	Madan	Baghdair	NA	Negative	NA	Negative	NA	Negative	NA	Negative	NA	Negative	NA	Negative	27.695	Maybe	NA	Negative	NA	Negative	NA	Negative	32.43	Negative	NA	Negative	15.31	Positive	NA	Negative	NA	Negative	NA	Negative	NA	Negative	NA	Negative	NA	Negative	NA	Negative	26.56	Maybe	31.01
110	M102602	2015-10-26 06:50:48+00:00	2015-10-28 08:30:04+00:00	Netrakona	Madan	Madan	NA	Negative	NA	Negative	NA	Negative	NA	Negative	NA	Negative	NA	Negative	NA	Negative	NA	Negative	NA	Negative	NA	Negative	NA	Negative	NA	Negative	20.06	Positive	NA	Negative	NA	Negative	NA	Negative	NA	Negative	NA	Negative	25.94	Positive	NA	Negative	NA	NonDetect	NA
111	M102603	2015-10-26 13:10:51+00:00	2015-10-29 06:49:40+00:00	Netrakona	Nayekpur	Nayekpur Paschimpara	NA	Negative	NA	Negative	NA	Negative	NA	Negative	21.47	Positive	NA	Negative	NA	Negative	NA	Negative	NA	Negative	NA	Negative	29.6	Negative	NA	Negative	9.665	Positive	NA	Negative	26.91	Maybe	NA	Negative	NA	Negative	13.66	Positive	NA	Negative	NA	Negative	NA	NonDetect	29.78
112	M102604	2015-10-26 14:25:49+00:00	2015-10-27 10:00:12+00:00	Netrakona	Madan	Kapasatia	NA	Negative	NA	Negative	NA	Negative	NA	Negative	27.12	Maybe	NA	Negative	28.68	Negative	NA	Negative	NA	Negative	NA	Negative	33.485	Negative	NA	Negative	16.05	Positive	NA	Negative	NA	Negative	NA	Negative	NA	Negative	NA	Negative	NA	Negative	NA	Negative	NA	NonDetect	NA
113	M102701	2015-10-27 01:00:37+00:00	2015-10-28 08:00:50+00:00	Netrakona	Madan	Madan	24.445	Positive	NA	Negative	NA	Negative	NA	Negative	29.455	Negative	NA	Negative	NA	Negative	NA	Negative	NA	Negative	NA	Negative	31.835	Negative	NA	Negative	13.375	Positive	NA	Negative	NA	Negative	NA	Negative	NA	Negative	28.11	Negative	NA	Negative	NA	Negative	NA	NonDetect	33.13
114	M102801	2015-10-28 05:10:48+00:00	2015-10-29 04:30:27+00:00	Netrakona	Madan	Madan	NA	Negative	NA	Negative	NA	Negative	NA	Negative	28.45	Negative	NA	Negative	NA	Negative	NA	Negative	NA	Negative	NA	Negative	23.74	Positive	NA	Negative	15.82	Positive	NA	Negative	NA	Negative	NA	Negative	17.865	Positive	NA	Negative	NA	Negative	NA	Negative	NA	NonDetect	30.915
115	M102901	2015-10-29 13:30:06+00:00	2015-10-31 03:30:30+00:00	Netrakona	Madan	Madan	NA	Negative	NA	Negative	NA	Negative	NA	Negative	19.95	Positive	NA	Negative	26	NA	33.965	Negative	NA	Negative	NA	Negative	28.45	Negative	NA	Negative	9.43	Positive	NA	Negative	NA	Negative	NA	Negative	NA	Negative	22.39	Positive	NA	Negative	34.015	Negative	NA	NonDetect	NA
116	M103101	2015-10-30 20:00:19+00:00	2015-11-01 06:00:27+00:00	Netrakona	Fatehpur	Bantiosree	NA	Negative	NA	Negative	NA	Negative	NA	Negative	27.465	Maybe	NA	Negative	NA	Negative	NA	Negative	NA	Negative	NA	Negative	NA	Negative	NA	Negative	16.835	Positive	NA	Negative	NA	Negative	NA	Negative	NA	Negative	NA	Negative	NA	Negative	NA	Negative	26.28	Maybe	NA
117	M103102	2015-10-31 01:50:45+00:00	2015-11-01 04:30:27+00:00	Netrakona	Madan	Madan	NA	Negative	NA	Negative	NA	Negative	NA	Negative	31.155	Negative	NA	Negative	NA	Negative	NA	Negative	NA	Negative	NA	Negative	NA	Negative	NA	Negative	15.43	Positive	NA	Negative	NA	Negative	NA	Negative	NA	Negative	21.115	Positive	NA	Negative	24.065	Positive	NA	NonDetect	30.59
118	M103103	2015-10-31 04:30:33+00:00	2015-11-02 04:30:21+00:00	Netrakona	Madan	Madan	NA	Negative	NA	Negative	NA	Negative	NA	Negative	NA	Negative	NA	Negative	NA	Negative	NA	Negative	NA	Negative	NA	Negative	NA	Negative	NA	Negative	22.73	Positive	NA	Negative	NA	Negative	NA	Negative	NA	Negative	NA	Negative	NA	Negative	NA	Negative	NA	NonDetect	NA
119	M103104	2015-10-31 08:00:33+00:00	2015-11-02 04:00:44+00:00	Netrakona	Tiasree	Balali	NA	Negative	NA	Negative	NA	Negative	NA	Negative	NA	Negative	NA	Negative	NA	Negative	NA	Negative	NA	Negative	NA	Negative	NA	Negative	NA	Negative	22.355	Positive	NA	Negative	NA	Negative	NA	Negative	NA	Negative	26.67	Maybe	NA	Negative	NA	Negative	NA	NonDetect	NA
120	M103105	2011-10-31 15:10:46+00:00	2015-11-01 15:00:52+00:00	Netrakona	Sukhari	Hatia	NA	Negative	NA	Negative	NA	Negative	NA	Negative	NA	Negative	NA	Negative	29.68	Negative	33.38	Negative	NA	Negative	NA	Negative	NA	Negative	NA	Negative	13.555	Positive	NA	Negative	NA	Negative	NA	Negative	NA	Negative	NA	Negative	28.345	Negative	NA	Negative	NA	NonDetect	NA
121	M110101	2015-11-01 01:40:30+00:00	2015-11-02 09:00:45+00:00	Netrakona	Madan	Madan	34.05	Negative	NA	Negative	NA	Negative	NA	Negative	30.34	Negative	NA	Negative	29.955	Negative	32.215	Negative	NA	Negative	NA	Negative	28.42	Negative	27.58	Maybe	10.35	Positive	NA	Negative	NA	Negative	NA	Negative	31.955	Negative	NA	Negative	NA	Negative	NA	Negative	30.575	Negative	30.355
122	M110102	2015-11-01 02:15:08+00:00	2015-11-02 15:00:55+00:00	Netrakona	Maghan	Maghan	NA	Negative	NA	Negative	NA	Negative	NA	Negative	NA	Negative	NA	Negative	NA	Negative	NA	Negative	NA	Negative	NA	Negative	30.305	Negative	28.51	Negative	18.08	Positive	NA	Negative	NA	Negative	NA	Negative	NA	Negative	28.7	Negative	NA	Negative	28.73	Negative	NA	NonDetect	28.495
123	M110103	2015-11-01 11:00:08+00:00	2015-11-03 03:40:33+00:00	Netrakona	Fatehpur	Bantiosree	NA	Negative	NA	Negative	NA	Negative	NA	Negative	34.725	Negative	NA	Negative	NA	Negative	NA	Negative	NA	Negative	NA	Negative	NA	Negative	NA	Negative	19.91	Positive	NA	Negative	NA	Negative	NA	Negative	NA	Negative	27.78	Maybe	NA	Negative	NA	Negative	NA	NonDetect	NA
124	M110104	2015-11-01 11:10:54+00:00	2015-11-02 12:00:18+00:00	Netrakona	Madan	Madan	NA	Negative	NA	Negative	NA	Negative	NA	Negative	NA	Negative	NA	Negative	NA	Negative	32.71	Negative	NA	Negative	NA	Negative	31.26	Negative	NA	Negative	13.55	Positive	NA	Negative	NA	Negative	29.31	Negative	28.55	Negative	29.63	Negative	NA	Negative	33.51	Negative	NA	NonDetect	28.1
125	M110201	2015-11-02 02:10:14+00:00	2015-11-04 05:00:19+00:00	Netrakona	Madan	Madan	NA	Negative	NA	Negative	NA	Negative	NA	Negative	NA	Negative	NA	Negative	NA	Negative	30.4	Negative	NA	Negative	NA	Negative	31.08	Negative	NA	Negative	12.665	Positive	NA	Negative	NA	Negative	28.16	Negative	NA	Negative	NA	Negative	NA	Negative	24.455	Positive	NA	NonDetect	29.835
126	M110202	2015-11-02 15:30:45+00:00	2015-11-03 08:30:29+00:00	Netrakona	Madan	Barikandi	NA	Negative	NA	Negative	NA	Negative	NA	Negative	32.58	Negative	NA	Negative	NA	Negative	NA	Negative	NA	Negative	NA	Negative	NA	Negative	NA	Negative	20.845	Positive	NA	Negative	NA	Negative	NA	Negative	NA	Negative	NA	Negative	NA	Negative	NA	Negative	NA	NonDetect	NA
127	M110301	2015-11-03 03:40:36+00:00	2015-11-03 12:00:33+00:00	Netrakona	Madan	Madan	NA	Negative	NA	Negative	NA	Negative	NA	Negative	34.31	Negative	NA	Negative	28.37	Negative	31.07	Negative	NA	Negative	NA	Negative	29.9	Negative	NA	Negative	13.51	Positive	NA	Negative	NA	Negative	NA	Negative	NA	Negative	NA	Negative	NA	Negative	34.08	Negative	NA	NonDetect	32.72
128	M110302	2015-09-06 11:54:37+00:00	2015-11-04 07:00:20+00:00	Netrakona	Ganda	Garadia	NA	Negative	NA	Negative	NA	Negative	NA	Negative	33.42	Negative	NA	Negative	NA	Negative	NA	Negative	NA	Negative	NA	Negative	NA	Negative	NA	Negative	17.255	Positive	NA	Negative	NA	Negative	NA	Negative	NA	Negative	22.99	Positive	NA	Negative	21.945	Positive	NA	NonDetect	28.35
129	M110303	2015-11-03 16:55:46+00:00	2015-11-05 04:00:23+00:00	Netrakona	Gobindasree	Gobindasree	NA	Negative	NA	Negative	NA	Negative	NA	Negative	30.905	Negative	NA	Negative	NA	Negative	29.975	Negative	NA	Negative	NA	Negative	32.02	Negative	NA	Negative	14.675	Positive	NA	Negative	NA	Negative	NA	Negative	33.99	Negative	26.15	Maybe	NA	Negative	NA	Negative	NA	NonDetect	NA
130	M110304	2015-11-03 05:55:59+00:00	2015-11-07 04:00:53+00:00	Netrakona	Madan	Kapasatia	NA	Negative	NA	Negative	NA	Negative	NA	Negative	29.72	Negative	NA	Negative	27.14	Maybe	NA	Negative	NA	Negative	NA	Negative	NA	Negative	NA	Negative	17.805	Positive	NA	Negative	NA	Negative	NA	Negative	NA	Negative	NA	Negative	NA	Negative	NA	Negative	NA	NonDetect	NA
131	M110305	2015-11-03 06:10:46+00:00	2015-11-04 07:00:01+00:00	Netrakona	Madan	Madan	NA	Negative	NA	Negative	NA	Negative	NA	Negative	NA	Negative	NA	Negative	NA	Negative	NA	Negative	NA	Negative	NA	Negative	NA	Negative	NA	Negative	15.42	Positive	NA	Negative	NA	Negative	NA	Negative	NA	Negative	NA	Negative	NA	Negative	20.28	Positive	NA	NonDetect	29.885
132	M110401	2015-11-04 11:20:49+00:00	2015-11-07 03:00:19+00:00	Netrakona	Fatehpur	Bantiosree	NA	Negative	NA	Negative	NA	Negative	NA	Negative	21.98	Positive	NA	Negative	NA	Negative	NA	Negative	NA	Negative	NA	Negative	32.44	Negative	NA	Negative	11.735	Positive	NA	Negative	NA	Negative	NA	Negative	NA	Negative	14.105	Positive	NA	Negative	NA	Negative	NA	NonDetect	32.68
133	M110402	2015-11-04 13:20:53+00:00	2015-11-07 04:00:01+00:00	Netrakona	Tiasree	Kutarikona	NA	Negative	NA	Negative	NA	Negative	NA	Negative	32.845	Negative	NA	Negative	NA	Negative	NA	Negative	NA	Negative	26.6	Maybe	30.585	Negative	NA	Negative	12.105	Positive	NA	Negative	NA	Negative	NA	Negative	28.14	Negative	NA	Negative	NA	Negative	NA	Negative	NA	NonDetect	32.67
134	M110501	2015-11-05 01:30:31+00:00	2015-11-06 12:00:37+00:00	Netrakona	Madan	Kapasatia	NA	Negative	NA	Negative	NA	Negative	NA	Negative	33.22	Negative	NA	Negative	29.99	Negative	NA	Negative	NA	Negative	NA	Negative	NA	Negative	NA	Negative	18.9	Positive	NA	Negative	NA	Negative	NA	Negative	NA	Negative	23.615	Positive	NA	Negative	NA	Negative	NA	NonDetect	31.36
135	M110502	2015-11-05 16:25:50+00:00	2015-11-07 03:00:06+00:00	Netrakona	Madan	Ganganagar	NA	Negative	NA	Negative	NA	Negative	NA	Negative	31.405	Negative	NA	Negative	NA	Negative	NA	Negative	NA	Negative	NA	Negative	NA	Negative	NA	Negative	17.645	Positive	NA	Negative	NA	Negative	NA	Negative	NA	Negative	27.95	Maybe	NA	Negative	NA	Negative	27.58	Maybe	33.85
136	M110801	2015-11-08 03:15:06+00:00	2015-11-09 02:30:10+00:00	Netrakona	Madan	Madan	NA	Negative	NA	Negative	NA	Negative	NA	Negative	26.83	Maybe	26.925	Maybe	NA	Negative	NA	Negative	32.4	Negative	NA	Negative	NA	Negative	29.67	Negative	13.365	Positive	NA	Negative	NA	Negative	NA	Negative	NA	Negative	17.825	Positive	NA	Negative	NA	Negative	NA	NonDetect	30.715
137	M110901	2015-11-09 06:20:47+00:00	2015-11-09 16:00:27+00:00	Netrakona	Kaitail	Keshjani	NA	Negative	NA	Negative	NA	Negative	NA	Negative	NA	Negative	NA	Negative	NA	Negative	NA	Negative	NA	Negative	NA	Negative	NA	Negative	NA	Negative	17.075	Positive	NA	Negative	NA	Negative	NA	Negative	NA	Negative	NA	Negative	NA	Negative	NA	Negative	NA	NonDetect	NA
138	M110902	2015-11-09 01:45:39+00:00	2015-11-10 08:30:45+00:00	Netrakona	Madan	Barburi	NA	Negative	NA	Negative	NA	Negative	NA	Negative	29.63	Negative	NA	Negative	26.25	Maybe	NA	Negative	NA	Negative	NA	Negative	NA	Negative	NA	Negative	18.045	Positive	NA	Negative	NA	Negative	NA	Negative	NA	Negative	NA	Negative	NA	Negative	28.53	Negative	NA	NonDetect	NA
139	M110903	2015-11-09 06:35:42+00:00	2015-11-10 08:00:55+00:00	Netrakona	Madan	Barburi	NA	Negative	NA	Negative	NA	Negative	NA	Negative	NA	Negative	NA	Negative	NA	Negative	NA	Negative	NA	Negative	NA	Negative	NA	Negative	NA	Negative	16.935	Positive	NA	Negative	NA	Negative	NA	Negative	NA	Negative	NA	Negative	NA	Negative	NA	Negative	NA	NonDetect	NA
140	M110904	2015-11-09 10:25:00+00:00	2015-11-10 09:00:20+00:00	Netrakona	Madan	Kumarikona	NA	Negative	NA	Negative	NA	Negative	NA	Negative	34.75	Negative	NA	Negative	NA	Negative	NA	Negative	NA	Negative	NA	Negative	34.7	Negative	NA	Negative	16.57	Positive	NA	Negative	NA	Negative	NA	Negative	NA	Negative	27.82	Maybe	NA	Negative	NA	Negative	22.145	Positive	NA
141	M111001	2015-11-10 02:15:41+00:00	2015-11-11 02:30:10+00:00	Netrakona	Kaitail	Keshjani	NA	Negative	NA	Negative	NA	Negative	NA	Negative	NA	Negative	NA	Negative	NA	Negative	NA	Negative	NA	Negative	27.8	Maybe	33.18	Negative	NA	Negative	17.49	Positive	NA	Negative	NA	Negative	NA	Negative	NA	Negative	NA	Negative	NA	Negative	NA	Negative	30.47	Negative	30.465
142	M111002	2015-11-10 09:20:19+00:00	2015-11-11 05:00:54+00:00	Netrakona	Maghan	Ranihala	NA	Negative	NA	Negative	NA	Negative	NA	Negative	26.985	Maybe	NA	Negative	NA	Negative	NA	Negative	NA	Negative	NA	Negative	34.57	Negative	NA	Negative	15.98	Positive	NA	Negative	NA	Negative	NA	Negative	NA	Negative	NA	Negative	NA	Negative	NA	Negative	NA	NonDetect	NA
143	M111003	2015-11-10 11:00:37+00:00	2015-11-12 03:00:24+00:00	Netrakona	Maghan	Ranihala	NA	Negative	NA	Negative	NA	Negative	NA	Negative	33.405	Negative	NA	Negative	NA	Negative	34.97	Negative	NA	Negative	NA	Negative	30.46	Negative	29.98	Negative	9.73	Positive	NA	Negative	NA	Negative	21.685	Positive	21.465	Positive	NA	Negative	NA	Negative	26.085	Maybe	13.85	Positive	27.8
144	M111004	2015-11-10 12:00:57+00:00	2015-11-11 05:30:13+00:00	Netrakona	Sukhari	Sonajor	NA	Negative	NA	Negative	NA	Negative	NA	Negative	30.315	Negative	NA	Negative	NA	Negative	NA	Negative	NA	Negative	NA	Negative	NA	Negative	NA	Negative	13.305	Positive	NA	Negative	NA	Negative	28.16	Negative	NA	Negative	NA	Negative	NA	Negative	NA	Negative	NA	NonDetect	33.79
145	M111101	2015-11-11 08:10:52+00:00	2015-11-12 01:00:37+00:00	Netrakona	Madan	Madan	NA	Negative	NA	Negative	NA	Negative	NA	Negative	NA	Negative	NA	Negative	NA	Negative	NA	Negative	NA	Negative	NA	Negative	30.505	Negative	NA	Negative	17.445	Positive	NA	Negative	NA	Negative	27.22	Maybe	29.46	Negative	NA	Negative	NA	Negative	NA	Negative	NA	NonDetect	30.915
146	M111102	2015-11-11 08:40:11+00:00	2015-11-12 10:00:23+00:00	Netrakona	Madan	Barburi	NA	Negative	NA	Negative	NA	Negative	NA	Negative	NA	Negative	NA	Negative	NA	Negative	NA	Negative	NA	Negative	NA	Negative	29.76	Negative	NA	Negative	11.135	Positive	NA	Negative	NA	Negative	NA	Negative	13.135	Positive	28.1	Negative	NA	Negative	33.07	Negative	22.915	Positive	24.5
147	M111103	2015-11-11 10:35:03+00:00	2015-11-12 05:00:24+00:00	Netrakona	Madan	Kuliati (Nasirpur)	NA	NA	NA	NA	NA	NA	NA	NA	NA	NA	NA	NA	NA	NA	NA	NA	NA	NA	NA	NA	NA	NA	NA	NA	NA	NA	NA	NA	NA	NA	NA	NA	NA	NA	NA	NA	NA	NA	NA	NA	NA	NA	NA
148	M111201	2015-11-12 06:10:44+00:00	2015-11-12 07:00:05+00:00	Netrakona	Madan	Kuliati (Nasirpur)	NA	NA	NA	NA	NA	NA	NA	NA	NA	NA	NA	NA	NA	NA	NA	NA	NA	NA	NA	NA	NA	NA	NA	NA	NA	NA	NA	NA	NA	NA	NA	NA	NA	NA	NA	NA	NA	NA	NA	NA	NA	NA	NA
149	M111202	2015-11-12 06:30:15+00:00	2015-11-13 03:30:38+00:00	Netrakona	Maghan	Ranihala	NA	Negative	NA	Negative	NA	Negative	NA	Negative	NA	Negative	NA	Negative	NA	Negative	27.8	Maybe	NA	Negative	NA	Negative	32.03	Negative	NA	Negative	12.82	Positive	NA	Negative	NA	Negative	NA	Negative	33.855	Negative	20.19	Positive	NA	Negative	30.79	Negative	NA	NonDetect	32.485
150	M111401	2015-11-14 01:05:59+00:00	2015-11-15 07:00:09+00:00	Netrakona	Madan	Uchitpur	NA	Negative	NA	Negative	NA	Negative	NA	Negative	30.505	Negative	27.76	Maybe	NA	Negative	32.625	Negative	NA	Negative	NA	Negative	33.76	Negative	NA	Negative	14.225	Positive	NA	Negative	NA	Negative	28.19	Negative	NA	Negative	26.94	Maybe	NA	Negative	NA	Negative	NA	NonDetect	33.86
151	M111402	2015-11-14 02:10:25+00:00	2015-11-15 04:00:57+00:00	Netrakona	Madan	Madan	NA	Negative	NA	Negative	NA	Negative	NA	Negative	29.11	Negative	31.155	Negative	NA	Negative	34.59	Negative	NA	Negative	NA	Negative	33.21	Negative	NA	Negative	14.625	Positive	NA	Negative	26.71	Maybe	NA	Negative	NA	Negative	NA	Negative	NA	Negative	NA	Negative	NA	NonDetect	34.91
152	M111403	2015-11-14 05:40:48+00:00	2015-11-15 06:00:51+00:00	Netrakona	Madan	Kaikuria	NA	Negative	NA	Negative	NA	Negative	NA	Negative	28.435	Negative	NA	Negative	NA	Negative	NA	Negative	NA	Negative	NA	Negative	NA	Negative	NA	Negative	16.21	Positive	NA	Negative	NA	Negative	NA	Negative	NA	Negative	NA	Negative	NA	Negative	NA	Negative	NA	NonDetect	NA
153	M111501	2015-11-15 03:55:51+00:00	2015-11-16 04:00:13+00:00	Netrakona	Madan	Madan	NA	Negative	NA	Negative	18.21	Positive	NA	Negative	24.01	Positive	18.82	Positive	NA	Negative	33.145	Negative	NA	Negative	NA	Negative	30.07	Negative	NA	Negative	10.42	Positive	NA	Negative	NA	Negative	NA	Negative	33.5	Negative	15.18	Positive	NA	Negative	30.475	Negative	NA	NonDetect	29.995
154	M111502	2015-11-15 05:40:30+00:00	2015-11-16 04:00:22+00:00	Netrakona	Maghan	Ghatua	NA	Negative	NA	Negative	NA	Negative	NA	Negative	28.875	Negative	NA	Negative	NA	Negative	NA	Negative	NA	Negative	NA	Negative	NA	Negative	NA	Negative	15.49	Positive	NA	Negative	NA	Negative	NA	Negative	NA	Negative	26.29	Maybe	NA	Negative	22.285	Positive	NA	NonDetect	31.405
155	M111503	2015-11-15 06:00:35+00:00	2015-11-16 04:00:00+00:00	Netrakona	Fatehpur	Hatsira	NA	Negative	NA	Negative	NA	Negative	NA	Negative	31.93	Negative	NA	Negative	29.47	Negative	NA	Negative	NA	Negative	NA	Negative	NA	Negative	NA	Negative	17.94	Positive	NA	Negative	NA	Negative	NA	Negative	NA	Negative	NA	Negative	NA	Negative	NA	Negative	27.36	Maybe	33.635
156	M111601	2015-11-16 07:00:56+00:00	2015-11-17 04:00:59+00:00	Netrakona	Tiasree	Balali	NA	Negative	NA	Negative	NA	Negative	NA	Negative	28.245	Negative	NA	Negative	NA	Negative	32.63	Negative	NA	Negative	NA	Negative	NA	Negative	NA	Negative	16.01	Positive	NA	Negative	NA	Negative	NA	Negative	NA	Negative	21.225	Positive	NA	Negative	NA	Negative	NA	NonDetect	NA
157	M111602	2015-11-16 14:55:10+00:00	2015-11-17 13:30:40+00:00	Netrakona	Madan	Parashkhila	NA	Negative	NA	Negative	NA	Negative	NA	Negative	34.315	Negative	NA	Negative	NA	Negative	NA	Negative	NA	Negative	NA	Negative	24.33	Positive	NA	Negative	15.145	Positive	NA	Negative	27.43	Maybe	NA	Negative	21.55	Positive	NA	Negative	NA	Negative	NA	Negative	NA	NonDetect	31.26
158	M111603	2015-11-16 16:25:48+00:00	2015-11-17 05:00:53+00:00	Netrakona	Nayekpur	Barati	NA	Negative	NA	Negative	NA	Negative	NA	Negative	31.085	Negative	NA	Negative	27.675	Maybe	NA	Negative	NA	Negative	NA	Negative	NA	Negative	NA	Negative	17.785	Positive	NA	Negative	NA	Negative	NA	Negative	27.325	Maybe	21.24	Positive	NA	Negative	NA	Negative	NA	NonDetect	NA
159	M111701	2015-11-17 09:15:59+00:00	2015-11-18 11:00:16+00:00	Netrakona	Madan	Madan	NA	Negative	NA	Negative	NA	Negative	NA	Negative	NA	Negative	NA	Negative	NA	Negative	33.25	Negative	NA	Negative	NA	Negative	NA	Negative	NA	Negative	13.725	Positive	NA	Negative	NA	Negative	NA	Negative	NA	Negative	NA	Negative	NA	Negative	NA	Negative	NA	NonDetect	32.75
160	M111702	2015-11-17 09:20:49+00:00	2015-11-18 10:00:48+00:00	Netrakona	Kaitail	Kaitail	NA	Negative	NA	Negative	NA	Negative	NA	Negative	NA	Negative	NA	Negative	NA	Negative	NA	Negative	NA	Negative	NA	Negative	27.455	Maybe	NA	Negative	21.71	Positive	NA	Negative	NA	Negative	NA	Negative	NA	Negative	NA	Negative	NA	Negative	NA	Negative	NA	NonDetect	NA
161	M111703	2015-11-17 10:00:45+00:00	2015-11-17 12:00:05+00:00	Netrakona	Kaitail	Kaitail	NA	NA	NA	NA	NA	NA	NA	NA	NA	NA	NA	NA	NA	NA	NA	NA	NA	NA	NA	NA	NA	NA	NA	NA	NA	NA	NA	NA	NA	NA	NA	NA	NA	NA	NA	NA	NA	NA	NA	NA	NA	NA	NA
162	M111801	2015-11-18 04:50:00+00:00	2015-11-19 04:00:38+00:00	Netrakona	Kaitail	Barabari	NA	Negative	NA	Negative	NA	Negative	NA	Negative	NA	Negative	NA	Negative	NA	Negative	NA	Negative	NA	Negative	NA	Negative	34.09	Negative	NA	Negative	17.465	Positive	NA	Negative	NA	Negative	NA	Negative	NA	Negative	24.445	Positive	NA	Negative	NA	Negative	27.48	Maybe	NA
163	M111802	2015-11-18 05:15:25+00:00	2015-11-19 05:00:58+00:00	Netrakona	Kaitail	Gobindapur	NA	Negative	NA	Negative	NA	Negative	NA	Negative	27.915	Maybe	NA	Negative	29.33	Negative	32.33	Negative	NA	Negative	NA	Negative	25.93	Positive	NA	Negative	8.46	Positive	NA	Negative	NA	Negative	NA	Negative	NA	Negative	18.075	Positive	NA	Negative	34.65	Negative	14.435	Positive	25.575
164	M111901	2015-11-19 12:00:04+00:00	2015-11-21 06:00:13+00:00	Netrakona	Kaitail	Gobindapur	NA	Negative	NA	Negative	NA	Negative	NA	Negative	NA	Negative	NA	Negative	27.72	Maybe	NA	Negative	NA	Negative	NA	Negative	NA	Negative	28	NA	24.91	Positive	NA	Negative	NA	Negative	NA	Negative	NA	Negative	NA	Negative	NA	Negative	NA	Negative	NA	NonDetect	33.43
165	M111902	2015-11-19 17:35:07+00:00	2015-11-21 07:00:06+00:00	Netrakona	Kaitail	Keshjani	NA	Negative	NA	Negative	NA	Negative	NA	Negative	29.67	Negative	NA	Negative	NA	Negative	NA	Negative	NA	Negative	NA	Negative	NA	Negative	NA	Negative	18.175	Positive	NA	Negative	NA	Negative	NA	Negative	NA	Negative	NA	Negative	NA	Negative	NA	Negative	NA	NonDetect	34.6
166	M112101	2015-11-20 18:50:19+00:00	2015-11-22 07:00:51+00:00	Netrakona	Madan	Ganganagar	NA	Negative	NA	Negative	NA	Negative	NA	Negative	NA	Negative	NA	Negative	NA	Negative	NA	Negative	NA	Negative	NA	Negative	25.48	Positive	27.66	Maybe	16.02	Positive	NA	Negative	28.45	Negative	NA	Negative	NA	Negative	NA	Negative	NA	Negative	31.07	Negative	20.82	Positive	28.76
167	M112102	2015-11-20 20:50:07+00:00	2015-11-22 04:00:15+00:00	Netrakona	Maghan	Ranihala	NA	Negative	NA	Negative	NA	Negative	NA	Negative	33.04	Negative	31.915	Negative	28.625	Negative	33.15	Negative	NA	Negative	NA	Negative	32.025	Negative	NA	Negative	12.88	Positive	34.17	Negative	NA	Negative	NA	Negative	NA	Negative	NA	Negative	NA	Negative	27.425	Maybe	23.13	Positive	27.485
168	M112103	2015-11-21 01:00:51+00:00	2015-11-22 03:00:25+00:00	Netrakona	Kaitail	Keshjani	NA	Negative	NA	Negative	NA	Negative	NA	Negative	32.19	Negative	28.095	Negative	NA	Negative	NA	Negative	NA	Negative	NA	Negative	30.06	Negative	NA	Negative	12.715	Positive	NA	Negative	NA	Negative	NA	Negative	NA	Negative	NA	Negative	NA	Negative	NA	Negative	NA	NonDetect	NA
169	M112104	2015-11-21 03:30:17+00:00	2015-11-22 03:00:53+00:00	Netrakona	Madan	Madan	34.76	Negative	NA	Negative	NA	Negative	NA	Negative	NA	Negative	NA	Negative	NA	Negative	NA	Negative	NA	Negative	NA	Negative	NA	Negative	NA	Negative	14.605	Positive	NA	Negative	NA	Negative	NA	Negative	NA	Negative	NA	Negative	NA	Negative	NA	Negative	NA	NonDetect	33.62
170	M112105	2015-11-21 04:10:23+00:00	2015-11-22 02:00:16+00:00	Netrakona	Madan	Kumarikona	34.78	Negative	NA	Negative	NA	Negative	NA	Negative	22.905	Positive	NA	Negative	29.2	Negative	NA	Negative	NA	Negative	NA	Negative	28.88	Negative	NA	Negative	11.015	Positive	NA	Negative	NA	Negative	23.93	Positive	24.42	Positive	29.04	Negative	NA	Negative	NA	Negative	NA	NonDetect	29.575
171	M112106	2015-11-21 06:40:10+00:00	2015-11-22 06:00:41+00:00	Netrakona	Maghan	Ruhili	NA	Negative	27.365	Maybe	NA	Negative	NA	Negative	NA	Negative	NA	Negative	NA	Negative	NA	Negative	NA	Negative	NA	Negative	NA	Negative	NA	Negative	15.47	Positive	NA	Negative	NA	Negative	28.11	Negative	23.49	Positive	NA	Negative	NA	Negative	24.56	Positive	NA	NonDetect	NA
172	M112107	2015-11-22 13:50:39+00:00	2015-11-23 06:00:21+00:00	Netrakona	Madan	Madan	NA	Negative	NA	Negative	NA	Negative	NA	Negative	29.085	Negative	NA	Negative	NA	Negative	31.265	Negative	NA	Negative	NA	Negative	NA	Negative	NA	Negative	11.495	Positive	NA	Negative	NA	Negative	NA	Negative	NA	Negative	NA	Negative	NA	Negative	NA	Negative	NA	NonDetect	24.455
173	M112108	2015-11-21 16:40:38+00:00	2015-11-23 08:00:46+00:00	Netrakona	Madan	Madan	NA	Negative	NA	Negative	NA	Negative	NA	Negative	NA	Negative	NA	Negative	NA	Negative	NA	Negative	NA	Negative	NA	Negative	NA	Negative	NA	Negative	20.98	Positive	NA	Negative	NA	Negative	NA	Negative	NA	Negative	NA	Negative	NA	Negative	NA	Negative	NA	NonDetect	33.84
174	M112201	2015-11-22 03:45:02+00:00	2015-11-24 04:00:15+00:00	Netrakona	Madan	Madan	NA	Negative	NA	Negative	NA	Negative	NA	Negative	NA	Negative	NA	Negative	NA	Negative	NA	Negative	NA	Negative	NA	Negative	NA	Negative	NA	Negative	20.25	Positive	NA	Negative	NA	Negative	NA	Negative	NA	Negative	NA	Negative	NA	Negative	NA	Negative	NA	NonDetect	NA
175	M112301	2015-11-23 03:40:59+00:00	2015-11-24 08:00:27+00:00	Netrakona	Madan	Madan	NA	Negative	NA	Negative	NA	Negative	NA	Negative	NA	Negative	NA	Negative	29.4	Negative	34.125	Negative	NA	Negative	NA	Negative	32.7	Negative	NA	Negative	11.91	Positive	33.1	Negative	NA	Negative	NA	Negative	NA	Negative	NA	Negative	NA	Negative	29.66	Negative	NA	NonDetect	29.165
176	M112302	2015-11-23 04:15:44+00:00	2015-11-24 07:30:21+00:00	Netrakona	Madan	Madan	NA	Negative	18.775	Positive	NA	Negative	NA	Negative	27.425	Maybe	NA	Negative	NA	Negative	34.07	Negative	NA	Negative	NA	Negative	NA	Negative	NA	Negative	15.48	Positive	NA	Negative	NA	Negative	NA	Negative	NA	Negative	NA	Negative	26.53	Maybe	33.85	Negative	NA	NonDetect	NA
177	M112401	2015-11-24 01:48:51+00:00	2015-11-25 02:30:34+00:00	Netrakona	Kaitail	Keshjani	NA	Negative	NA	Negative	NA	Negative	NA	Negative	27.405	Maybe	NA	Negative	28.53	Negative	NA	Negative	NA	Negative	NA	Negative	NA	Negative	NA	Negative	16.225	Positive	NA	Negative	NA	Negative	NA	Negative	NA	Negative	27.77	Maybe	25.29	Positive	NA	Negative	NA	NonDetect	NA
178	M112402	2015-11-24 05:20:18+00:00	2015-11-25 04:00:39+00:00	Netrakona	Sukhari	Sukhari	NA	Negative	27.77	Maybe	NA	Negative	NA	Negative	26.2	Maybe	NA	Negative	NA	Negative	34.45	Negative	NA	Negative	26.6	Maybe	33.485	Negative	NA	Negative	15.02	Positive	NA	Negative	26.5	Maybe	27.99	Maybe	NA	Negative	24.975	Positive	NA	Negative	27.71	Maybe	NA	NonDetect	33.11
179	M112501	2015-11-25 02:00:44+00:00	2015-11-26 04:00:17+00:00	Netrakona	Madan	Baghdair	NA	Negative	NA	Negative	NA	Negative	NA	Negative	NA	Negative	NA	Negative	NA	Negative	32.54	Negative	NA	Negative	23.445	Positive	30.76	Negative	NA	Negative	13.18	Positive	NA	Negative	NA	Negative	NA	Negative	NA	Negative	32.475	Negative	NA	Negative	23.33	Positive	NA	NonDetect	28.27
180	M112502	2015-11-25 03:30:08+00:00	2015-11-26 03:30:23+00:00	Netrakona	Maghan	Naya Para	NA	Negative	NA	Negative	NA	Negative	NA	Negative	NA	Negative	23.3	Positive	NA	Negative	26.32	Maybe	NA	Negative	NA	Negative	27.035	Maybe	NA	Negative	10.285	Positive	NA	Negative	NA	Negative	26.83	Maybe	29.79	Negative	22.115	Positive	NA	Negative	NA	Negative	NA	NonDetect	32.285
181	M112601	2015-11-26 05:15:29+00:00	2015-11-27 11:00:19+00:00	Netrakona	Madan	Madan	NA	Negative	28.55	Negative	NA	Negative	NA	Negative	NA	Negative	NA	Negative	NA	Negative	NA	Negative	NA	Negative	NA	Negative	NA	Negative	NA	Negative	22.16	Positive	NA	Negative	NA	Negative	NA	Negative	NA	Negative	25.185	Positive	NA	Negative	NA	Negative	NA	NonDetect	NA
182	M112602	2015-11-26 12:30:24+00:00	2015-11-27 14:00:06+00:00	Netrakona	Madan	Madan	NA	Negative	NA	Negative	NA	Negative	NA	Negative	NA	Negative	NA	Negative	23.96	Positive	NA	Negative	NA	Negative	NA	Negative	NA	Negative	NA	Negative	11.99	Positive	NA	Negative	27.72	Maybe	NA	Negative	NA	Negative	25.935	Positive	NA	Negative	NA	Negative	NA	NonDetect	31.855
183	M112901	2015-11-29 05:10:46+00:00	2015-11-30 00:00:17+00:00	Netrakona	Tiasree	Dhobahala	NA	Negative	NA	Negative	NA	Negative	NA	Negative	25.7	Positive	NA	Negative	NA	Negative	NA	Negative	NA	Negative	NA	Negative	32.99	Negative	NA	Negative	12.48	Positive	NA	Negative	NA	Negative	NA	Negative	NA	Negative	15.285	Positive	NA	Negative	NA	Negative	NA	NonDetect	31.05
184	M112902	2015-11-29 10:00:49+00:00	2015-12-01 03:00:03+00:00	Netrakona	Dalpa	Daila	NA	Negative	NA	Negative	NA	Negative	NA	Negative	34.19	Negative	NA	Negative	NA	Negative	NA	Negative	NA	Negative	NA	Negative	NA	Negative	NA	Negative	20.57	Positive	NA	Negative	NA	Negative	NA	Negative	NA	Negative	NA	Negative	NA	Negative	NA	Negative	NA	NonDetect	NA
185	M113001	2015-11-30 01:00:13+00:00	2015-12-01 04:00:37+00:00	Netrakona	Sukhari	Nilkantapur	NA	Negative	NA	Negative	NA	Negative	NA	Negative	34.91	Negative	NA	Negative	NA	Negative	NA	Negative	NA	Negative	NA	Negative	NA	Negative	NA	Negative	17.47	Positive	NA	Negative	NA	Negative	NA	Negative	NA	Negative	NA	Negative	NA	Negative	29.34	Negative	34.61	Negative	31.46
186	M113002	2015-11-30 02:30:24+00:00	2015-12-02 03:00:36+00:00	Netrakona	Maghan	Ranihala	NA	Negative	NA	Negative	NA	Negative	NA	Negative	34.94	Negative	NA	Negative	NA	Negative	NA	Negative	NA	Negative	NA	Negative	NA	Negative	28.49	Negative	17.585	Positive	NA	Negative	NA	Negative	NA	Negative	NA	Negative	NA	Negative	NA	Negative	NA	Negative	NA	NonDetect	NA
187	M113003	2015-11-30 04:40:55+00:00	2015-12-02 03:00:39+00:00	Netrakona	Kaitail	Keshjani	NA	Negative	NA	Negative	NA	Negative	NA	Negative	28.265	Negative	NA	Negative	NA	Negative	NA	Negative	NA	Negative	NA	Negative	32.4	Negative	NA	Negative	9.75	Positive	NA	Negative	NA	Negative	NA	Negative	NA	Negative	NA	Negative	NA	Negative	NA	Negative	NA	NonDetect	30.505
188	M120201	2015-12-02 00:55:40+00:00	2015-12-03 06:00:55+00:00	Netrakona	Kaitail	Sreepur (Baruri)	NA	Negative	NA	Negative	NA	Negative	NA	Negative	NA	Negative	NA	Negative	NA	Negative	34.66	Negative	NA	Negative	NA	Negative	32.41	Negative	NA	Negative	15.615	Positive	NA	Negative	NA	Negative	NA	Negative	NA	Negative	NA	Negative	NA	Negative	NA	Negative	NA	NonDetect	29.085
189	M120202	2015-12-02 01:20:38+00:00	2015-12-02 18:00:05+00:00	Netrakona	Fatehpur	Uttar Deosalla	24.185	Positive	NA	Negative	NA	Negative	NA	Negative	NA	Negative	NA	Negative	NA	Negative	NA	Negative	NA	Negative	NA	Negative	NA	Negative	NA	Negative	17.345	Positive	NA	Negative	NA	Negative	NA	Negative	34.29	Negative	NA	Negative	NA	Negative	NA	Negative	30.295	Negative	NA
190	M120203	2015-12-02 07:00:02+00:00	2015-12-03 05:00:17+00:00	Netrakona	Kaitail	Keshjani	NA	Negative	NA	Negative	NA	Negative	NA	Negative	NA	Negative	NA	Negative	29.99	Negative	NA	Negative	NA	Negative	NA	Negative	31.03	Negative	NA	Negative	16.595	Positive	NA	Negative	NA	Negative	NA	Negative	NA	Negative	NA	Negative	NA	Negative	NA	Negative	NA	NonDetect	NA
191	M120204	2015-12-02 13:25:45+00:00	2015-12-03 10:00:48+00:00	Netrakona	Madan	Madan	NA	Negative	NA	Negative	NA	Negative	NA	Negative	32.79	Negative	NA	Negative	NA	Negative	NA	Negative	NA	Negative	NA	Negative	31.46	Negative	26.32	Maybe	14.97	Positive	NA	Negative	27.14	Maybe	28.1	Negative	NA	Negative	28.65	Negative	NA	Negative	26.11	Maybe	18.785	Positive	34.5
192	M120205	2015-12-02 15:50:11+00:00	2015-12-03 11:00:42+00:00	Netrakona	Madan	Ganganagar	NA	Negative	NA	Negative	NA	Negative	NA	Negative	33.425	Negative	NA	Negative	NA	Negative	NA	Negative	NA	Negative	NA	Negative	NA	Negative	NA	Negative	19.52	Positive	NA	Negative	NA	Negative	NA	Negative	NA	Negative	NA	Negative	NA	Negative	NA	Negative	NA	NonDetect	NA
193	M120301	2015-12-03 01:55:15+00:00	2015-12-05 03:00:09+00:00	Netrakona	Madan	Ganganagar	NA	NA	NA	NA	NA	NA	NA	NA	NA	NA	NA	NA	NA	NA	NA	NA	NA	NA	NA	NA	NA	NA	NA	NA	NA	NA	NA	NA	NA	NA	NA	NA	NA	NA	NA	NA	NA	NA	NA	NA	NA	NonDetect	NA
194	M120302	2015-12-03 02:40:49+00:00	2015-12-05 03:00:47+00:00	Netrakona	Kaitail	Keshjani	NA	Negative	NA	Negative	NA	Negative	NA	Negative	NA	Negative	NA	Negative	NA	Negative	31.815	Negative	NA	Negative	NA	Negative	34.57	Negative	NA	Negative	17.78	Positive	NA	Negative	NA	Negative	NA	Negative	NA	Negative	NA	Negative	NA	Negative	NA	Negative	NA	NonDetect	NA
195	M120501	2015-12-05 04:25:03+00:00	2015-12-06 04:00:52+00:00	Netrakona	Madan	Madan	NA	Negative	NA	Negative	NA	Negative	NA	Negative	29.5	Negative	NA	Negative	NA	Negative	NA	Negative	NA	Negative	NA	Negative	NA	Negative	NA	Negative	17.835	Positive	NA	Negative	NA	Negative	NA	Negative	NA	Negative	27.22	Maybe	NA	Negative	NA	Negative	NA	NonDetect	NA
196	M120502	2015-12-05 04:25:15+00:00	2015-12-06 05:00:37+00:00	Netrakona	Madan	Madan	NA	Negative	NA	Negative	NA	Negative	NA	Negative	34.54	Negative	22.56	Positive	29.07	Negative	NA	Negative	NA	Negative	NA	Negative	34.86	Negative	NA	Negative	13.945	Positive	NA	Negative	NA	Negative	NA	Negative	NA	Negative	NA	Negative	NA	Negative	NA	Negative	NA	NonDetect	30.11
197	M120503	2015-12-05 06:05:02+00:00	2015-12-06 08:00:27+00:00	Netrakona	Paikura	Banipur	NA	Negative	27.465	Maybe	NA	Negative	NA	Negative	28.94	Negative	NA	Negative	NA	Negative	31.285	Negative	NA	Negative	NA	Negative	31.88	Negative	NA	Negative	13.15	Positive	NA	Negative	NA	Negative	NA	Negative	NA	Negative	NA	Negative	NA	Negative	NA	Negative	NA	NonDetect	33.42
198	M120504	2015-12-05 13:00:01+00:00	2015-12-07 04:00:29+00:00	Netrakona	Madan	Madan	NA	Negative	NA	Negative	NA	Negative	NA	Negative	NA	Negative	NA	Negative	NA	Negative	NA	Negative	NA	Negative	NA	Negative	NA	Negative	NA	Negative	20.3	Positive	NA	Negative	NA	Negative	NA	Negative	NA	Negative	NA	Negative	NA	Negative	NA	Negative	NA	NonDetect	NA
199	M120505	2015-12-05 16:35:15+00:00	2015-12-06 18:00:43+00:00	Netrakona	Madan	Madan	NA	Negative	NA	Negative	NA	Negative	NA	Negative	NA	Negative	NA	Negative	NA	Negative	34.19	Negative	NA	Negative	NA	Negative	NA	Negative	NA	Negative	10.495	Positive	NA	Negative	NA	Negative	NA	Negative	NA	Negative	14.12	Positive	NA	Negative	NA	Negative	NA	NonDetect	28.53
200	M120601	2015-12-06 00:15:36+00:00	2015-12-08 04:30:03+00:00	Netrakona	Madan	Madan	NA	Negative	NA	Negative	NA	Negative	NA	Negative	30.12	Negative	NA	Negative	NA	Negative	NA	Negative	NA	Negative	NA	Negative	NA	Negative	NA	Negative	16.245	Positive	NA	Negative	NA	Negative	NA	Negative	NA	Negative	26.17	Maybe	NA	Negative	NA	Negative	NA	NonDetect	30.86
201	M120602	2015-12-06 04:05:51+00:00	2015-12-08 04:30:22+00:00	Netrakona	Fatehpur	Paschim Fatehpur	NA	Negative	NA	Negative	NA	Negative	NA	Negative	33.155	Negative	NA	Negative	NA	Negative	27.605	Maybe	NA	Negative	NA	Negative	NA	Negative	NA	Negative	13.61	Positive	NA	Negative	NA	Negative	NA	Negative	34.13	Negative	21.87	Positive	NA	Negative	NA	Negative	NA	NonDetect	33.525
202	M120603	2015-12-06 04:25:21+00:00	2015-12-07 04:30:27+00:00	Netrakona	Madan	Madan	NA	Negative	NA	Negative	NA	Negative	34.4	Negative	30.95	Negative	NA	Negative	NA	Negative	NA	Negative	NA	Negative	NA	Negative	NA	Negative	NA	Negative	18.585	Positive	NA	Negative	NA	Negative	28.745	Negative	26.78	Maybe	23.04	Positive	NA	Negative	NA	Negative	NA	NonDetect	NA
203	M120604	2015-12-06 09:25:59+00:00	2015-12-07 10:00:23+00:00	Netrakona	Gobindasree	Gobindasree	NA	Negative	NA	Negative	NA	Negative	NA	Negative	NA	Negative	NA	Negative	NA	Negative	NA	Negative	34.03	Negative	NA	Negative	NA	Negative	28.28	Negative	15.22	Positive	NA	Negative	25.355	Positive	28.24	Negative	27.73	Maybe	NA	Negative	NA	Negative	NA	Negative	22.4	Positive	29.38
204	M120605	2015-12-06 14:51:05+00:00	2015-12-07 04:00:04+00:00	Netrakona	Madan	Madan	NA	Negative	NA	Negative	NA	Negative	NA	Negative	34.25	Negative	NA	Negative	NA	Negative	NA	Negative	34.52	Negative	NA	Negative	NA	Negative	NA	Negative	15.805	Positive	NA	Negative	NA	Negative	NA	Negative	NA	Negative	NA	Negative	NA	Negative	31.76	Negative	NA	NonDetect	NA
205	M120801	2015-12-08 05:00:41+00:00	2015-12-09 05:00:08+00:00	Netrakona	Madan	Barburi	NA	Negative	NA	Negative	NA	Negative	NA	Negative	26.57	Maybe	NA	Negative	29.16	Negative	NA	Negative	NA	Negative	NA	Negative	NA	Negative	NA	Negative	14.215	Positive	NA	Negative	NA	Negative	NA	Negative	27.055	Maybe	17.11	Positive	NA	Negative	24.65	Positive	NA	NonDetect	30.37
206	M120802	2015-12-08 15:18:19+00:00	2015-12-09 07:00:16+00:00	Netrakona	Sukhari	Hatia	NA	Negative	NA	Negative	NA	Negative	NA	Negative	NA	Negative	26.065	Maybe	NA	Negative	30.185	Negative	32.63	Negative	NA	Negative	NA	Negative	NA	Negative	11.815	Positive	NA	Negative	NA	Negative	NA	Negative	NA	Negative	NA	Negative	NA	Negative	NA	Negative	NA	NonDetect	31.71
207	M120901	2015-12-09 03:00:19+00:00	2015-12-12 04:00:22+00:00	Netrakona	Madan	Madan	24.885	Positive	NA	Negative	NA	Negative	NA	Negative	NA	Negative	NA	Negative	NA	Negative	NA	Negative	NA	Negative	NA	Negative	33.02	Negative	NA	Negative	16.45	Positive	NA	Negative	NA	Negative	NA	Negative	NA	Negative	NA	Negative	NA	Negative	NA	Negative	NA	NonDetect	32.01
208	M121001	2015-12-10 03:10:28+00:00	2015-12-12 04:00:49+00:00	Netrakona	Chandgaon	Purbapara	NA	Negative	NA	Negative	NA	Negative	NA	Negative	26.9	Maybe	27.66	Maybe	NA	Negative	33.105	Negative	NA	Negative	NA	Negative	32.16	Negative	NA	Negative	13.085	Positive	NA	Negative	NA	Negative	NA	Negative	NA	Negative	26.645	Maybe	NA	Negative	27.86	Maybe	NA	NonDetect	34.705
209	M121201	2015-12-11 19:00:01+00:00	2015-12-13 04:00:29+00:00	Netrakona	Madan	Madan	NA	Negative	NA	Negative	NA	Negative	NA	Negative	NA	Negative	NA	Negative	NA	Negative	NA	Negative	NA	Negative	NA	Negative	34.83	Negative	NA	Negative	23.44	Positive	NA	Negative	NA	Negative	NA	Negative	NA	Negative	NA	Negative	NA	Negative	NA	Negative	NA	NonDetect	NA
210	M121202	2015-12-12 01:40:15+00:00	2015-12-13 06:00:37+00:00	Netrakona	Madan	Madan	NA	Negative	NA	Negative	NA	Negative	NA	Negative	NA	Negative	NA	Negative	NA	Negative	NA	Negative	34.42	Negative	NA	Negative	NA	Negative	NA	Negative	21.03	Positive	NA	Negative	NA	Negative	NA	Negative	NA	Negative	28.59	Negative	NA	Negative	34.375	Negative	NA	NonDetect	26.38
211	M121203	2015-12-12 04:35:12+00:00	2015-12-13 07:00:27+00:00	Netrakona	Madan	Madan	NA	Negative	NA	Negative	NA	Negative	NA	Negative	NA	Negative	NA	Negative	NA	Negative	33.83	Negative	NA	Negative	NA	Negative	NA	Negative	NA	Negative	18.72	Positive	NA	Negative	NA	Negative	NA	Negative	NA	Negative	NA	Negative	NA	Negative	33.68	Negative	NA	NonDetect	33.95
212	M121204	2015-12-12 06:35:55+00:00	2015-12-13 08:00:23+00:00	Netrakona	Madan	Madan	NA	Negative	NA	Negative	23.54	Positive	NA	Negative	26.8	Maybe	23.905	Positive	28.605	Negative	27.74	Maybe	NA	Negative	NA	Negative	30.92	Negative	NA	Negative	11.135	Positive	NA	Negative	NA	Negative	NA	Negative	NA	Negative	19.925	Positive	NA	Negative	NA	Negative	NA	NonDetect	27.83
213	M121301	2015-12-13 01:00:48+00:00	2015-12-14 05:49:32+00:00	Netrakona	Madan	Madan	NA	Negative	NA	Negative	NA	Negative	NA	Negative	30.2	Negative	NA	Negative	NA	Negative	34.58	Negative	NA	Negative	NA	Negative	32.36	Negative	NA	Negative	11.225	Positive	NA	Negative	NA	Negative	NA	Negative	NA	Negative	NA	Negative	24.815	Positive	NA	Negative	NA	NonDetect	27.84
214	M121401	2015-12-14 15:23:25+00:00	2015-12-15 04:00:54+00:00	Netrakona	Sukhari	Bhabanipur (Debdwar)	NA	Negative	NA	Negative	NA	Negative	NA	Negative	30.18	Negative	NA	Negative	NA	Negative	NA	Negative	NA	Negative	NA	Negative	31.92	Negative	NA	Negative	16.27	Positive	NA	Negative	NA	Negative	20.965	Positive	20.225	Positive	NA	Negative	NA	Negative	NA	Negative	NA	NonDetect	33.5
215	M121501	2015-12-15 02:00:23+00:00	2015-12-16 06:00:11+00:00	Netrakona	Madan	Madan	NA	Negative	NA	Negative	NA	Negative	NA	Negative	NA	Negative	31.69	Negative	29.61	Negative	NA	Negative	NA	Negative	NA	Negative	31.665	Negative	NA	Negative	11.17	Positive	NA	Negative	NA	Negative	NA	Negative	NA	Negative	16.425	Positive	NA	Negative	27.275	Maybe	NA	NonDetect	28.325
216	M121701	2015-12-17 02:30:37+00:00	2015-12-19 04:00:34+00:00	Netrakona	Madan	Kuliati (Nasirpur)	NA	Negative	NA	Negative	NA	Negative	NA	Negative	29.1	Negative	NA	Negative	NA	Negative	31.05	Negative	NA	Negative	NA	Negative	33.96	Negative	NA	Negative	14.63	Positive	NA	Negative	NA	Negative	21.675	Positive	20.755	Positive	NA	Negative	NA	Negative	NA	Negative	NA	NonDetect	NA
217	M121702	2015-12-17 07:20:49+00:00	2015-12-19 04:30:49+00:00	Netrakona	Tiasree	Baghjan	NA	Negative	NA	Negative	NA	Negative	NA	Negative	30.245	Negative	NA	Negative	NA	Negative	NA	Negative	NA	Negative	NA	Negative	NA	Negative	NA	Negative	20.155	Positive	NA	Negative	NA	Negative	NA	Negative	27.185	Maybe	23.33	Positive	NA	Negative	NA	Negative	NA	NonDetect	NA
218	M121901	2015-12-19 01:45:22+00:00	2015-12-20 04:00:19+00:00	Netrakona	Mendipur	Nurpur Boali	NA	Negative	NA	Negative	NA	Negative	NA	Negative	31.375	Negative	NA	Negative	NA	Negative	NA	Negative	NA	Negative	NA	Negative	34.04	Negative	NA	Negative	18.375	Positive	NA	Negative	NA	Negative	NA	Negative	NA	Negative	22.285	Positive	NA	Negative	33.425	Negative	NA	NonDetect	NA
219	M121902	2015-12-19 11:40:51+00:00	2015-12-20 07:00:10+00:00	Netrakona	Madan	Barburi	NA	Negative	NA	Negative	NA	Negative	NA	Negative	30.975	Negative	NA	Negative	NA	Negative	NA	Negative	NA	Negative	NA	Negative	NA	Negative	NA	Negative	20.76	Positive	NA	Negative	NA	Negative	NA	Negative	NA	Negative	23.37	Positive	25.98	Positive	NA	Negative	NA	NonDetect	NA
220	M121903	2015-12-19 14:40:30+00:00	2015-12-20 08:00:45+00:00	Netrakona	Madan	Kuliati (Nasirpur)	24.39	Positive	NA	Negative	NA	Negative	NA	Negative	32.17	Negative	31.92	Negative	26.795	Maybe	33.18	Negative	NA	Negative	NA	Negative	28.46	Negative	NA	Negative	12.51	Positive	NA	Negative	NA	Negative	NA	Negative	29.34	Negative	NA	Negative	NA	Negative	NA	Negative	NA	NonDetect	30.425
221	M122101	2015-12-21 05:00:06+00:00	2015-12-22 02:00:48+00:00	Netrakona	Madan	Madan	NA	Negative	NA	Negative	NA	Negative	NA	Negative	30.115	Negative	NA	Negative	NA	Negative	NA	Negative	NA	Negative	NA	Negative	NA	Negative	NA	Negative	17.63	Positive	NA	Negative	NA	Negative	NA	Negative	NA	Negative	NA	Negative	NA	Negative	NA	Negative	NA	NonDetect	NA
222	M122102	2015-12-21 11:40:15+00:00	2015-12-22 04:00:53+00:00	Netrakona	Maghan	Maghan	NA	Negative	NA	Negative	NA	Negative	NA	Negative	NA	Negative	NA	Negative	NA	Negative	NA	Negative	NA	Negative	NA	Negative	NA	Negative	NA	Negative	21.1	Positive	NA	Negative	NA	Negative	NA	Negative	NA	Negative	28.21	Negative	NA	Negative	NA	Negative	NA	NonDetect	NA
223	M122103	2015-12-21 12:00:54+00:00	2015-12-22 04:30:06+00:00	Netrakona	Sukhari	Hatia	NA	Negative	NA	Negative	NA	Negative	NA	Negative	NA	Negative	NA	Negative	NA	Negative	NA	Negative	NA	Negative	NA	Negative	28.58	Negative	NA	Negative	16.11	Positive	NA	Negative	NA	Negative	NA	Negative	NA	Negative	NA	Negative	NA	Negative	NA	Negative	NA	NonDetect	NA
224	M122201	2015-12-22 04:10:28+00:00	2015-12-23 10:20:16+00:00	Netrakona	Sukhari	Debasree	NA	Negative	NA	Negative	NA	Negative	NA	Negative	29.78	Negative	27.82	Maybe	NA	Negative	NA	Negative	NA	Negative	NA	Negative	NA	Negative	NA	Negative	15.635	Positive	NA	Negative	NA	Negative	NA	Negative	NA	Negative	23.44	Positive	NA	Negative	NA	Negative	NA	NonDetect	NA
225	M122202	2015-12-22 15:25:59+00:00	2015-12-23 10:30:22+00:00	Netrakona	Madan	Madan	NA	Negative	NA	Negative	NA	Negative	NA	Negative	NA	Negative	NA	Negative	NA	Negative	NA	Negative	NA	Negative	NA	Negative	NA	Negative	NA	Negative	18.92	Positive	NA	Negative	NA	Negative	NA	Negative	NA	Negative	NA	Negative	NA	Negative	NA	Negative	NA	NonDetect	33.1
226	M122301	2015-12-23 03:20:44+00:00	2015-12-24 04:00:01+00:00	Netrakona	Fatehpur	Dakshin Deosalla	NA	Negative	NA	Negative	NA	Negative	NA	Negative	NA	Negative	NA	Negative	NA	Negative	32.665	Negative	NA	Negative	NA	Negative	NA	Negative	NA	Negative	18.35	Positive	NA	Negative	NA	Negative	NA	Negative	NA	Negative	26.41	Maybe	NA	Negative	NA	Negative	NA	NonDetect	NA
227	M122302	2015-12-23 06:00:49+00:00	2015-12-24 03:00:31+00:00	Netrakona	Madan	Kuliati (Nasirpur)	NA	Negative	NA	Negative	NA	Negative	NA	Negative	30.1	Negative	NA	Negative	NA	Negative	NA	Negative	NA	Negative	NA	Negative	NA	Negative	NA	Negative	16.625	Positive	NA	Negative	NA	Negative	NA	Negative	NA	Negative	NA	Negative	NA	Negative	23.34	Positive	NA	NonDetect	30.58
228	M122303	2015-12-23 11:45:48+00:00	2015-12-24 11:00:36+00:00	Netrakona	Kaitail	Barabari	NA	Negative	NA	Negative	NA	Negative	NA	Negative	29.765	Negative	NA	Negative	NA	Negative	30.055	Negative	NA	Negative	NA	Negative	23.82	Positive	NA	Negative	12.105	Positive	32.81	Negative	NA	Negative	28.39	Negative	19.2	Positive	NA	Negative	NA	Negative	34.38	Negative	NA	NonDetect	27.07
229	M122401	2015-12-24 05:30:28+00:00	2015-12-25 05:00:05+00:00	Netrakona	Maghan	Ranihala	NA	Negative	27.93	Maybe	NA	Negative	NA	Negative	32.185	Negative	NA	Negative	NA	Negative	NA	Negative	NA	Negative	NA	Negative	NA	Negative	NA	Negative	20.4	Positive	NA	Negative	NA	Negative	28.05	Negative	26.49	Maybe	25.655	Positive	NA	Negative	33.9	Negative	NA	NonDetect	32.54
230	M122402	2015-12-24 14:10:08+00:00	2015-12-25 06:00:03+00:00	Netrakona	Madan	Uchitpur	NA	Negative	NA	Negative	NA	Negative	NA	Negative	NA	Negative	NA	Negative	29.04	Negative	29.715	Negative	31.74	Negative	NA	Negative	27.19	Maybe	NA	Negative	8.375	Positive	NA	Negative	NA	Negative	NA	Negative	28.865	Negative	20.015	Positive	NA	Negative	28.83	Negative	NA	NonDetect	30.34
231	M122601	2015-12-26 01:00:59+00:00	2015-12-27 08:00:18+00:00	Netrakona	Kandiura	Kundali	NA	Negative	NA	Negative	NA	Negative	NA	Negative	NA	Negative	NA	Negative	25.82	Positive	NA	Negative	NA	Negative	NA	Negative	33.81	Negative	NA	Negative	16.085	Positive	NA	Negative	NA	Negative	NA	Negative	NA	Negative	NA	Negative	NA	Negative	25.775	Positive	NA	NonDetect	34.13
232	M122602	2015-12-26 04:00:42+00:00	2015-12-27 04:00:34+00:00	Netrakona	Madan	Madan	NA	Negative	NA	Negative	NA	Negative	NA	Negative	NA	Negative	NA	Negative	NA	Negative	34.205	Negative	NA	Negative	NA	Negative	32.11	Negative	NA	Negative	13.67	Positive	NA	Negative	NA	Negative	NA	Negative	NA	Negative	NA	Negative	NA	Negative	22.755	Positive	NA	NonDetect	30.33
233	M122603	2015-12-26 07:30:26+00:00	2015-12-27 07:00:22+00:00	Netrakona	Teligati	Teliganti	23.05	Positive	NA	Negative	NA	Negative	NA	Negative	33.75	Negative	NA	Negative	30.02	Negative	NA	Negative	NA	Negative	NA	Negative	33.265	Negative	NA	Negative	15.235	Positive	NA	Negative	NA	Negative	NA	Negative	NA	Negative	NA	Negative	NA	Negative	27.46	Maybe	NA	NonDetect	30.635
234	M122701	2015-12-26 22:30:53+00:00	2015-12-28 03:00:38+00:00	Netrakona	Maghan	Maghan	NA	Negative	NA	Negative	NA	Negative	NA	Negative	NA	Negative	NA	Negative	NA	Negative	NA	Negative	NA	Negative	NA	Negative	32.08	Negative	NA	Negative	14.02	Positive	NA	Negative	NA	Negative	NA	Negative	18	Positive	NA	Negative	NA	Negative	NA	Negative	NA	NonDetect	NA
235	M122702	2015-12-27 14:00:24+00:00	2015-12-28 04:00:39+00:00	Netrakona	Madan	Madan	NA	Negative	NA	Negative	NA	Negative	NA	Negative	26.59	Maybe	NA	Negative	NA	Negative	NA	Negative	NA	Negative	NA	Negative	33.86	Negative	NA	Negative	16.04	Positive	NA	Negative	NA	Negative	NA	Negative	28.62	Negative	NA	Negative	NA	Negative	NA	Negative	NA	NonDetect	33.77
236	M122801	2015-12-28 06:40:43+00:00	2015-12-29 05:00:18+00:00	Netrakona	Teligati	Teliganti	NA	Negative	NA	Negative	NA	Negative	NA	Negative	NA	Negative	NA	Negative	NA	Negative	NA	Negative	NA	Negative	NA	Negative	31.21	Negative	NA	Negative	12.05	Positive	NA	Negative	NA	Negative	NA	Negative	33.72	Negative	NA	Negative	NA	Negative	28.5	Negative	NA	NonDetect	28.17
237	M122901	2015-12-29 02:00:57+00:00	2015-12-30 04:00:27+00:00	Netrakona	Sukhari	Sukhari	NA	Negative	NA	Negative	NA	Negative	NA	Negative	NA	Negative	NA	Negative	NA	Negative	NA	Negative	NA	Negative	NA	Negative	NA	Negative	NA	Negative	15.92	Positive	NA	Negative	NA	Negative	NA	Negative	NA	Negative	NA	Negative	NA	Negative	NA	Negative	NA	NonDetect	34.8
238	M122902	2015-12-29 17:00:23+00:00	2015-12-30 10:00:29+00:00	Netrakona	Sukhari	Sukhari	NA	Negative	NA	Negative	NA	Negative	NA	Negative	29.05	Negative	NA	Negative	NA	Negative	31.1	Negative	NA	Negative	NA	Negative	NA	Negative	NA	Negative	13.14	Positive	NA	Negative	NA	Negative	NA	Negative	18.665	Positive	NA	Negative	NA	Negative	NA	Negative	NA	NonDetect	NA
239	N090701	2015-09-07 04:42:54+00:00	2015-09-08 09:56:23+00:00	Netrakona	Kailati	Maishakhali	NA	Negative	NA	Negative	NA	Negative	NA	Negative	NA	Negative	NA	Negative	29.01	Negative	NA	Negative	NA	Negative	NA	Negative	34.05	Negative	NA	Negative	16.19	Positive	NA	Negative	NA	Negative	NA	Negative	NA	Negative	NA	Negative	NA	Negative	NA	Negative	21.105	Positive	NA
240	N090702	2015-09-07 05:07:47+00:00	2015-09-08 05:45:35+00:00	Netrakona	Kailati	Maishakhali	NA	Negative	NA	Negative	NA	Negative	NA	Negative	33.83	Negative	NA	Negative	27.31	Maybe	18.675	Positive	NA	Negative	NA	Negative	29.855	Negative	26.23	Maybe	9.065	Positive	NA	Negative	NA	Negative	NA	Negative	NA	Negative	27.2	Maybe	NA	Negative	28.62	Negative	17.89	Positive	31.29
241	N090703	NA	2015-09-09 06:26:03+00:00	Netrakona	Singhar Bangla	Hariarganti	24.43	Positive	NA	Negative	NA	Negative	NA	Negative	29.9	Negative	NA	Negative	NA	Negative	31.455	Negative	NA	Negative	NA	Negative	31.93	Negative	NA	Negative	13.41	Positive	NA	Negative	NA	Negative	NA	Negative	NA	Negative	26.74	Maybe	NA	Negative	NA	Negative	NA	NonDetect	32.55
242	N090704	2015-09-07 06:17:30+00:00	2015-09-08 05:40:21+00:00	Netrakona	Challisha	Chandrapati Khila	21.595	Positive	NA	Negative	NA	Negative	NA	Negative	27.45	Maybe	23.56	Positive	29.65	Negative	30.695	Negative	NA	Negative	NA	Negative	19.69	Positive	NA	Negative	10.265	Positive	NA	Negative	27.87	Maybe	NA	Negative	16.02	Positive	NA	Negative	NA	Negative	NA	Negative	31.69	Negative	27.91
243	N090705	2015-09-07 07:34:52+00:00	2015-09-08 05:37:48+00:00	Netrakona	Ward No-04	NA	23.22	Positive	NA	Negative	NA	Negative	NA	Negative	NA	Negative	NA	Negative	NA	Negative	NA	Negative	NA	Negative	NA	Negative	NA	Negative	NA	Negative	15.77	Positive	NA	Negative	NA	Negative	NA	Negative	NA	Negative	NA	Negative	NA	Negative	NA	Negative	NA	NonDetect	NA
244	N090706	2015-09-07 08:24:40+00:00	2015-09-08 06:23:31+00:00	Netrakona	Sahata	Sahata	NA	NA	NA	NA	NA	NA	NA	NA	NA	NA	NA	NA	NA	NA	NA	NA	NA	NA	NA	NA	NA	NA	NA	NA	NA	NA	NA	NA	NA	NA	NA	NA	NA	NA	NA	NA	NA	NA	NA	NA	NA	NonDetect	NA
245	N090707	2015-09-07 08:34:04+00:00	2015-09-08 05:48:26+00:00	Netrakona	Rauha	Amli Keshabpur	NA	NA	NA	NA	NA	NA	NA	NA	NA	NA	NA	NA	NA	NA	NA	NA	NA	NA	NA	NA	NA	NA	NA	NA	NA	NA	NA	NA	NA	NA	NA	NA	NA	NA	NA	NA	NA	NA	NA	NA	NA	NonDetect	NA
246	N090708	2015-09-07 09:02:02+00:00	2015-09-09 06:30:09+00:00	Netrakona	Baniajan	Baniajan	NA	Negative	NA	Negative	NA	Negative	NA	Negative	27.825	Maybe	NA	Negative	28.3	Negative	31.195	Negative	NA	Negative	NA	Negative	33.065	Negative	NA	Negative	14.995	Positive	NA	Negative	NA	Negative	NA	Negative	34.97	Negative	20.17	Positive	NA	Negative	34.91	Negative	13.06	Positive	NA
247	N090709	NA	2015-09-09 05:13:42+00:00	Netrakona	Amtala	Atka Para	NA	Negative	NA	Negative	NA	Negative	NA	Negative	33.48	Negative	21.67	Positive	29.425	Negative	NA	Negative	NA	Negative	NA	Negative	31.38	Negative	NA	Negative	9.355	Positive	NA	Negative	NA	Negative	NA	Negative	NA	Negative	NA	Negative	NA	Negative	NA	Negative	NA	NonDetect	28.04
248	N090710	2015-09-08 04:28:43+00:00	2015-09-08 05:05:28+00:00	Netrakona	Ward No-04	New Town Bilpar	NA	Negative	NA	Negative	NA	Negative	NA	Negative	NA	Negative	NA	Negative	NA	Negative	NA	Negative	NA	Negative	NA	Negative	NA	Negative	NA	Negative	15.95	Positive	NA	Negative	NA	Negative	NA	Negative	NA	Negative	NA	Negative	NA	Negative	NA	Negative	NA	NonDetect	31.645
249	N090801	NA	2015-09-09 05:22:30+00:00	Netrakona	Ward No-07	NA	NA	Negative	NA	Negative	NA	Negative	NA	Negative	28.76	Negative	NA	Negative	NA	Negative	NA	Negative	NA	Negative	26.89	Maybe	NA	Negative	NA	Negative	18.305	Positive	NA	Negative	NA	Negative	NA	Negative	NA	Negative	NA	Negative	NA	Negative	NA	Negative	NA	NonDetect	28.785
250	N090802	NA	2015-09-08 16:30:05+00:00	Netrakona	Challisha	Chandrapati Khila	NA	Negative	NA	Negative	27.825	Maybe	NA	Negative	33.6	Negative	NA	Negative	NA	Negative	NA	Negative	NA	Negative	NA	Negative	33.16	Negative	NA	Negative	13.42	Positive	NA	Negative	NA	Negative	NA	Negative	NA	Negative	NA	Negative	NA	Negative	23.705	Positive	NA	NonDetect	29.255
251	N090803	2015-09-08 06:45:25+00:00	2015-09-10 04:26:17+00:00	Netrakona	Amtala	Shibprasadpur	20.53	Positive	NA	Negative	NA	Negative	NA	Negative	31.015	Negative	29.15	Negative	20.29	Positive	NA	Negative	NA	Negative	NA	Negative	34.5	Negative	NA	Negative	12.85	Positive	NA	Negative	27.715	Maybe	22.56	Positive	19.36	Positive	NA	Negative	NA	Negative	34.12	Negative	NA	NonDetect	NA
252	N090804	2015-09-08 07:39:27+00:00	2015-09-09 09:55:31+00:00	Netrakona	NA	NA	NA	Negative	NA	Negative	NA	Negative	NA	Negative	NA	Negative	NA	Negative	28.74	Negative	30.615	Negative	NA	Negative	NA	Negative	NA	Negative	NA	Negative	11.84	Positive	NA	Negative	NA	Negative	NA	Negative	33.98	Negative	16.555	Positive	NA	Negative	NA	Negative	NA	NonDetect	32.6
253	N090805	NA	2015-09-10 04:19:50+00:00	Netrakona	Kaliara Gabragat	Agnati	NA	Negative	NA	Negative	NA	Negative	NA	Negative	34.49	Negative	NA	Negative	NA	Negative	NA	Negative	NA	Negative	NA	Negative	33.82	Negative	NA	Negative	15.35	Positive	NA	Negative	NA	Negative	29.18	Negative	NA	Negative	NA	Negative	NA	Negative	NA	Negative	NA	NonDetect	30.12
254	N090806	NA	2015-09-10 03:19:06+00:00	Netrakona	Garadoba	Deopara	NA	Negative	NA	Negative	NA	Negative	NA	Negative	34.46	Negative	NA	Negative	30.92	Negative	NA	Negative	NA	Negative	NA	Negative	NA	Negative	NA	Negative	20.135	Positive	NA	Negative	NA	Negative	NA	Negative	NA	Negative	NA	Negative	NA	Negative	NA	Negative	NA	NonDetect	29.6
255	N090807	NA	2015-09-09 06:54:53+00:00	Netrakona	Medni	Khar Bangla	NA	NA	NA	NA	NA	NA	NA	NA	NA	NA	NA	NA	NA	NA	NA	NA	NA	NA	NA	NA	NA	NA	NA	NA	NA	NA	NA	NA	NA	NA	NA	NA	NA	NA	NA	NA	NA	NA	NA	NA	NA	NA	NA
256	N090808	NA	2015-09-10 03:20:01+00:00	Netrakona	Ward No-09	Balai Nagua	NA	Negative	NA	Negative	NA	Negative	NA	Negative	28.595	Negative	NA	Negative	28.27	Negative	NA	Negative	NA	Negative	NA	Negative	34.19	Negative	NA	Negative	15.295	Positive	NA	Negative	NA	Negative	NA	Negative	NA	Negative	NA	Negative	NA	Negative	23.58	Positive	NA	NonDetect	31.11
257	N090809	2015-09-08 10:54:50+00:00	2015-09-11 10:16:13+00:00	Netrakona	Ward No-08	Nagra Dhakin	NA	Negative	NA	Negative	NA	Negative	NA	Negative	33.01	Negative	NA	Negative	25.97	Positive	NA	Negative	NA	Negative	NA	Negative	NA	Negative	NA	Negative	17.425	Positive	NA	Negative	NA	Negative	NA	Negative	NA	Negative	NA	Negative	NA	Negative	NA	Negative	NA	NonDetect	NA
258	N090810	NA	2015-09-09 04:55:28+00:00	Netrakona	Singhar Bangla	Kona Para	NA	Negative	NA	Negative	NA	Negative	NA	Negative	NA	Negative	NA	Negative	NA	Negative	NA	Negative	NA	Negative	NA	Negative	NA	Negative	NA	Negative	18.9	Positive	NA	Negative	NA	Negative	NA	Negative	NA	Negative	NA	Negative	NA	Negative	NA	Negative	NA	NonDetect	31.91
259	N090901	2015-09-09 06:00:27+00:00	2015-09-10 11:20:42+00:00	Netrakona	Ward No-01	Barsikura	27.21	Maybe	NA	Negative	NA	Negative	NA	Negative	32.08	Negative	NA	Negative	25.96	Positive	NA	Negative	NA	Negative	NA	Negative	33.88	Negative	NA	Negative	16.86	Positive	NA	Negative	NA	Negative	NA	Negative	NA	Negative	27.01	Maybe	NA	Negative	28.63	Negative	26.275	Maybe	31.52
260	N090902	NA	2015-09-10 04:22:54+00:00	Netrakona	Ward No-02	NA	NA	Negative	NA	Negative	NA	Negative	NA	Negative	NA	Negative	NA	Negative	NA	Negative	NA	Negative	NA	Negative	NA	Negative	NA	Negative	NA	Negative	16.86	Positive	NA	Negative	NA	Negative	NA	Negative	NA	Negative	NA	Negative	NA	Negative	NA	Negative	NA	NonDetect	33.81
261	N090903	NA	2015-09-11 10:00:35+00:00	Netrakona	Ward No-07	Joynagar	NA	Negative	NA	Negative	NA	Negative	NA	Negative	32.67	Negative	NA	Negative	21.96	Positive	NA	Negative	NA	Negative	NA	Negative	NA	Negative	NA	Negative	14.435	Positive	NA	Negative	NA	Negative	NA	Negative	NA	Negative	NA	Negative	22.085	Positive	NA	Negative	NA	NonDetect	33.45
262	N091301	2015-09-13 14:18:44+00:00	2015-09-15 17:30:25+00:00	Netrakona	Lakshmiganj	Oail Para	27.01	Maybe	NA	Negative	NA	Negative	NA	Negative	28.715	Negative	NA	Negative	25.01	Positive	NA	Negative	34.51	Negative	NA	Negative	31.33	Negative	NA	Negative	11.035	Positive	NA	Negative	NA	Negative	NA	Negative	NA	Negative	23.235	Positive	NA	Negative	27.82	Maybe	30.56	Negative	32.96
263	N091401	2015-09-14 02:00:35+00:00	2015-09-15 04:30:28+00:00	Netrakona	Kailati	Maishakhali	NA	Negative	NA	Negative	NA	Negative	NA	Negative	25.405	Positive	NA	Negative	17.56	Positive	NA	Negative	NA	Negative	NA	Negative	30.38	Negative	NA	Negative	11.41	Positive	NA	Negative	NA	Negative	NA	Negative	NA	Negative	NA	Negative	NA	Negative	28.92	Negative	17.81	Positive	30.795
264	N091402	2015-09-14 02:42:18+00:00	2015-09-15 04:00:19+00:00	Netrakona	Kailati	Salpaikandi	33.87	Negative	NA	Negative	NA	Negative	NA	Negative	24.065	Positive	23.315	Positive	NA	Negative	27.67	Maybe	NA	Negative	NA	Negative	NA	Negative	NA	Negative	9.885	Positive	NA	Negative	NA	Negative	23.575	Positive	31.47	Negative	30.57	Negative	20.12	Positive	31.2	Negative	NA	NonDetect	29.405
265	N091403	2015-09-14 03:20:04+00:00	2015-09-15 03:50:56+00:00	Netrakona	Kaliara Gabragat	Naria Para	28.8	Negative	NA	Negative	NA	Negative	NA	Negative	25.205	Positive	16.49	Positive	29.905	Negative	NA	Negative	NA	Negative	NA	Negative	30.42	Negative	NA	Negative	11.525	Positive	NA	Negative	NA	Negative	NA	Negative	NA	Negative	NA	Negative	NA	Negative	NA	Negative	NA	NonDetect	33.815
266	N091404	2015-09-14 03:20:11+00:00	2015-09-18 10:00:35+00:00	Netrakona	Rauha	Kachuduari	22.495	Positive	NA	Negative	NA	Negative	NA	Negative	NA	Negative	23.265	Positive	NA	Negative	NA	Negative	NA	Negative	NA	Negative	NA	Negative	NA	Negative	15.375	Positive	NA	Negative	NA	Negative	NA	Negative	NA	Negative	31.67	Negative	NA	Negative	NA	Negative	NA	NonDetect	31.245
267	N091405	2015-09-14 05:40:07+00:00	2015-09-15 04:00:00+00:00	Netrakona	Narandia	Iaran	NA	Negative	NA	Negative	NA	Negative	NA	Negative	28.47	Negative	NA	Negative	NA	Negative	30.9	Negative	NA	Negative	NA	Negative	30.46	Negative	NA	Negative	12.875	Positive	NA	Negative	NA	Negative	NA	Negative	NA	Negative	NA	Negative	NA	Negative	21.765	Positive	NA	NonDetect	29.435
268	N091406	2015-09-14 05:30:21+00:00	2015-09-14 05:30:17+00:00	Netrakona	Ward No-08	Nagra Dhakin	NA	NA	NA	NA	NA	NA	NA	NA	NA	NA	NA	NA	NA	NA	NA	NA	NA	NA	NA	NA	NA	NA	NA	NA	NA	NA	NA	NA	NA	NA	NA	NA	NA	NA	NA	NA	NA	NA	NA	NA	NA	NA	NA
269	N091407	2015-09-14 05:45:50+00:00	2015-09-14 17:30:41+00:00	Netrakona	Maugati	Kanchanpur	NA	NA	NA	NA	NA	NA	NA	NA	NA	NA	NA	NA	NA	NA	NA	NA	NA	NA	NA	NA	NA	NA	NA	NA	NA	NA	NA	NA	NA	NA	NA	NA	NA	NA	NA	NA	NA	NA	NA	NA	NA	NA	NA
270	N091408	2015-09-14 06:17:22+00:00	2015-09-15 04:00:34+00:00	Mymensingh	Sahanati	Pathrail	NA	Negative	NA	Negative	NA	Negative	27.005	Maybe	27.03	Maybe	29.75	Negative	NA	Negative	29.425	Negative	NA	Negative	NA	Negative	29.725	Negative	NA	Negative	12.155	Positive	NA	Negative	29.35	Negative	NA	Negative	21.215	Positive	18.38	Positive	NA	Negative	NA	Negative	NA	NonDetect	34.88
271	N091409	2015-09-14 07:35:50+00:00	2015-09-14 17:15:41+00:00	Netrakona	Rauha	Bara Gara	NA	NA	NA	NA	NA	NA	NA	NA	NA	NA	NA	NA	NA	NA	NA	NA	NA	NA	NA	NA	NA	NA	NA	NA	NA	NA	NA	NA	NA	NA	NA	NA	NA	NA	NA	NA	NA	NA	NA	NA	NA	NA	NA
272	N091410	2015-09-14 08:40:49+00:00	2015-09-14 17:15:51+00:00	Netrakona	Rauha	Bara Gara	NA	NA	NA	NA	NA	NA	NA	NA	NA	NA	NA	NA	NA	NA	NA	NA	NA	NA	NA	NA	NA	NA	NA	NA	NA	NA	NA	NA	NA	NA	NA	NA	NA	NA	NA	NA	NA	NA	NA	NA	NA	NA	NA
273	N091411	2015-09-14 13:15:12+00:00	2015-09-15 04:45:28+00:00	Netrakona	Sahata	Sahata	NA	Negative	NA	Negative	NA	Negative	NA	Negative	27.3	Maybe	NA	Negative	20.84	Positive	NA	Negative	NA	Negative	NA	Negative	NA	Negative	NA	Negative	14.49	Positive	NA	Negative	NA	Negative	NA	Negative	NA	Negative	26.57	Maybe	NA	Negative	NA	Negative	NA	NonDetect	NA
274	N091412	2015-09-14 01:00:10+00:00	2015-09-17 10:00:57+00:00	Netrakona	Ward No-04	Gajendrapur	24.19	Positive	NA	Negative	NA	Negative	NA	Negative	32.415	Negative	34.2	Negative	28.2	Negative	NA	Negative	NA	Negative	NA	Negative	NA	Negative	NA	Negative	14.835	Positive	NA	Negative	NA	Negative	22.77	Positive	22.615	Positive	24.825	Positive	NA	Negative	NA	Negative	NA	NonDetect	34.4
275	N091413	2015-09-14 16:04:54+00:00	2015-09-14 12:07:47+00:00	Netrakona	Purbadhala	Narayandahar	28.34	Negative	NA	Negative	NA	Negative	NA	Negative	NA	Negative	NA	Negative	33.06	Negative	NA	Negative	NA	Negative	NA	Negative	NA	Negative	NA	Negative	20.985	Positive	NA	Negative	NA	Negative	NA	Negative	NA	Negative	NA	Negative	NA	Negative	NA	Negative	NA	NonDetect	32.935
276	N091501	2015-09-15 02:20:42+00:00	2015-09-15 12:00:15+00:00	Netrakona	Ward No-02	Satpai Town	NA	Negative	NA	Negative	NA	Negative	NA	Negative	NA	Negative	NA	Negative	NA	Negative	NA	Negative	NA	Negative	NA	Negative	33.33	Negative	NA	Negative	19.32	Positive	NA	Negative	NA	Negative	27.285	Maybe	33.39	Negative	NA	Negative	NA	Negative	NA	Negative	NA	NonDetect	NA
277	N091502	2015-09-15 03:00:48+00:00	2015-09-15 11:35:43+00:00	Netrakona	Ward No-09	Parla	NA	Negative	NA	Negative	NA	Negative	NA	Negative	24.65	Positive	15.18	Positive	NA	Negative	34.64	Negative	NA	Negative	NA	Negative	30.79	Negative	NA	Negative	12.405	Positive	NA	Negative	NA	Negative	NA	Negative	NA	Negative	NA	Negative	NA	Negative	NA	Negative	NA	NonDetect	31.445
278	N091503	2015-09-15 06:05:34+00:00	2015-09-15 12:37:13+00:00	Netrakona	Ward No-02	Satpai Town	NA	NA	NA	NA	NA	NA	NA	NA	NA	NA	NA	NA	NA	NA	NA	NA	NA	NA	NA	NA	NA	NA	NA	NA	NA	NA	NA	NA	NA	NA	NA	NA	NA	NA	NA	NA	NA	NA	NA	NA	NA	NA	NA
279	N091901	2015-09-19 04:10:35+00:00	2015-09-20 11:00:54+00:00	Netrakona	Ward No-05	Malni	NA	Negative	NA	Negative	NA	Negative	NA	Negative	30.415	Negative	26.24	Maybe	NA	Negative	NA	Negative	NA	Negative	NA	Negative	26.38	Maybe	NA	Negative	11.715	Positive	NA	Negative	NA	Negative	NA	Negative	NA	Negative	NA	Negative	NA	Negative	28.39	Negative	NA	NonDetect	27
280	N091902	2015-09-19 02:05:57+00:00	2015-09-21 07:30:28+00:00	Netrakona	Teligati	Sreerampur	NA	Negative	NA	Negative	NA	Negative	NA	Negative	NA	Negative	NA	Negative	NA	Negative	NA	Negative	NA	Negative	NA	Negative	31.905	Negative	NA	Negative	11.94	Positive	NA	Negative	NA	Negative	NA	Negative	29.04	Negative	NA	Negative	NA	Negative	27.195	Maybe	15.615	Positive	NA
281	N091903	2015-09-19 03:10:05+00:00	2015-09-20 04:30:32+00:00	Netrakona	Kailati	Kanuria	NA	Negative	NA	Negative	NA	Negative	NA	Negative	27.08	Maybe	NA	Negative	29.51	Negative	31.38	Negative	NA	Negative	NA	Negative	NA	Negative	NA	Negative	9.52	Positive	34.42	Negative	NA	Negative	NA	Negative	30.445	Negative	21.15	Positive	NA	Negative	NA	Negative	NA	NonDetect	31.255
282	N091904	2015-09-19 04:00:36+00:00	2015-09-20 06:05:27+00:00	Netrakona	Kailati	Kandi	21.81	Positive	NA	Negative	NA	Negative	NA	Negative	28.93	Negative	NA	Negative	23.02	Positive	NA	Negative	NA	Negative	NA	Negative	34.4	Negative	NA	Negative	14.55	Positive	NA	Negative	NA	Negative	NA	Negative	33.67	Negative	NA	Negative	NA	Negative	NA	Negative	NA	NonDetect	31.19
283	N091905	2015-09-19 05:30:04+00:00	2015-09-19 10:30:36+00:00	Netrakona	Amtala	Gachhgaria	NA	Negative	NA	Negative	NA	Negative	NA	Negative	NA	Negative	31.93	Negative	NA	Negative	NA	Negative	NA	Negative	NA	Negative	29.25	Negative	NA	Negative	12.86	Positive	32.69	Negative	NA	Negative	NA	Negative	NA	Negative	NA	Negative	NA	Negative	NA	Negative	NA	NonDetect	NA
284	N091906	2015-09-19 09:30:26+00:00	2015-09-20 04:20:47+00:00	Netrakona	Madanpur	Kangsa	NA	Negative	NA	Negative	NA	Negative	NA	Negative	NA	Negative	NA	Negative	30.7	Negative	NA	Negative	NA	Negative	NA	Negative	NA	Negative	NA	Negative	22.85	Positive	NA	Negative	NA	Negative	NA	Negative	NA	Negative	NA	Negative	NA	Negative	NA	Negative	NA	NonDetect	NA
285	N091907	2015-09-19 16:40:39+00:00	2015-09-21 07:20:17+00:00	Netrakona	Ward No-02	Chak Para Pashim	NA	Negative	NA	Negative	NA	Negative	NA	Negative	NA	Negative	NA	Negative	30.28	Negative	34.59	Negative	NA	Negative	NA	Negative	34.52	Negative	NA	Negative	20.55	Positive	NA	Negative	NA	Negative	NA	Negative	NA	Negative	NA	Negative	NA	Negative	33.88	Negative	NA	NonDetect	29.895
286	N092001	2015-09-20 01:20:46+00:00	2015-09-22 12:00:10+00:00	Netrakona	Kailati	Maujebali	NA	Negative	NA	Negative	NA	Negative	NA	Negative	28.135	Negative	NA	Negative	28.04	Negative	NA	Negative	NA	Negative	NA	Negative	34.64	Negative	NA	Negative	13.91	Positive	NA	Negative	NA	Negative	NA	Negative	NA	Negative	NA	Negative	NA	Negative	NA	Negative	NA	NonDetect	NA
287	N092002	2015-09-20 07:12:43+00:00	2015-09-22 04:00:16+00:00	Netrakona	Gaglajur	Gurahai	20.64	Positive	NA	Negative	NA	Negative	NA	Negative	30.525	Negative	NA	Negative	NA	Negative	NA	Negative	NA	Negative	NA	Negative	NA	Negative	NA	Negative	13.925	Positive	NA	Negative	NA	Negative	NA	Negative	30.59	Negative	NA	Negative	NA	Negative	NA	Negative	NA	NonDetect	31.915
288	N092003	2015-09-20 07:50:39+00:00	2015-09-23 04:30:32+00:00	Netrakona	Amtala	Mallikpur	NA	Negative	NA	Negative	NA	Negative	NA	Negative	NA	Negative	NA	Negative	21.08	Positive	NA	Negative	NA	Negative	NA	Negative	33.665	Negative	NA	Negative	13.11	Positive	NA	Negative	NA	Negative	NA	Negative	27.8	Maybe	NA	Negative	NA	Negative	NA	Negative	NA	NonDetect	NA
289	N092004	2015-09-20 08:00:54+00:00	2015-09-21 10:17:56+00:00	Netrakona	Teligati	Sreerampur	NA	Negative	NA	Negative	NA	Negative	NA	Negative	NA	Negative	NA	Negative	NA	Negative	NA	Negative	NA	Negative	NA	Negative	NA	Negative	NA	Negative	15.755	Positive	NA	Negative	NA	Negative	NA	Negative	NA	Negative	NA	Negative	NA	Negative	NA	Negative	20.08	Positive	32.23
290	N092005	2015-09-20 09:45:07+00:00	2015-09-21 12:00:34+00:00	Netrakona	Ward No-09	Kurpar	NA	Negative	NA	Negative	NA	Negative	NA	Negative	29.555	Negative	NA	Negative	NA	Negative	NA	Negative	NA	Negative	NA	Negative	34.63	Negative	NA	Negative	7.455	Positive	NA	Negative	NA	Negative	NA	Negative	NA	Negative	26.05	Maybe	NA	Negative	NA	Negative	NA	NonDetect	29.555
291	N092006	2015-09-20 13:45:06+00:00	2015-09-21 08:10:50+00:00	Netrakona	Sonai	Mallikpur Sonai	NA	Negative	NA	Negative	NA	Negative	NA	Negative	28.51	Negative	NA	Negative	NA	Negative	NA	Negative	NA	Negative	NA	Negative	31.975	Negative	NA	Negative	13.995	Positive	NA	Negative	NA	Negative	NA	Negative	NA	Negative	NA	Negative	NA	Negative	NA	Negative	NA	NonDetect	NA
292	N092007	2015-09-20 14:10:13+00:00	2015-09-22 04:00:02+00:00	Netrakona	Sahata	Hiluchia	NA	Negative	NA	Negative	NA	Negative	NA	Negative	33.705	Negative	NA	Negative	NA	Negative	30.79	Negative	NA	Negative	NA	Negative	32.575	Negative	NA	Negative	12.9	Positive	NA	Negative	29.855	Negative	NA	Negative	NA	Negative	NA	Negative	NA	Negative	19.315	Positive	33.24	Negative	26.095
293	N092008	2015-09-20 02:46:04+00:00	2015-09-21 06:20:47+00:00	Netrakona	Dakshin Bishiura	Palashati	NA	Negative	NA	Negative	NA	Negative	NA	Negative	30.245	Negative	NA	Negative	28.75	Negative	NA	Negative	NA	Negative	NA	Negative	NA	Negative	NA	Negative	15.495	Positive	NA	Negative	NA	Negative	NA	Negative	NA	Negative	NA	Negative	34.05	Negative	24.545	Positive	NA	NonDetect	30.27
294	N092101	2015-09-21 15:30:21+00:00	2015-09-24 04:30:32+00:00	Sunamganj	Madhyanagar	Madhyanagar	NA	Negative	NA	Negative	NA	Negative	NA	Negative	NA	Negative	NA	Negative	NA	Negative	NA	Negative	NA	Negative	NA	Negative	31.815	Negative	NA	Negative	11.84	Positive	NA	Negative	NA	Negative	NA	Negative	NA	Negative	15.33	Positive	NA	Negative	NA	Negative	NA	NonDetect	31.92
295	N092201	2015-09-22 01:10:24+00:00	2015-09-23 04:30:08+00:00	Netrakona	Teligati	Sreerampur	NA	Negative	NA	Negative	NA	Negative	NA	Negative	NA	Negative	27.57	Maybe	NA	Negative	NA	Negative	NA	Negative	NA	Negative	NA	Negative	NA	Negative	24.32	Positive	NA	Negative	NA	Negative	NA	Negative	NA	Negative	NA	Negative	NA	Negative	NA	Negative	NA	NonDetect	NA
296	N092801	2015-09-27 19:00:49+00:00	2015-09-29 04:30:29+00:00	Netrakona	Baushi	Baushi	NA	Negative	NA	Negative	NA	Negative	NA	Negative	30.84	Negative	31.71	Negative	NA	Negative	25.88	Positive	32.46	Negative	26.295	Maybe	31.46	Negative	NA	Negative	12.95	Positive	NA	Negative	NA	Negative	21.24	Positive	20.725	Positive	NA	Negative	NA	Negative	NA	Negative	NA	NonDetect	33.73
297	N092802	2015-09-28 02:00:52+00:00	2015-09-28 06:50:09+00:00	Netrakona	Ward No-05	Islampur	NA	Negative	NA	Negative	33.7	Negative	NA	Negative	30.67	Negative	28.9	Negative	NA	Negative	NA	Negative	NA	Negative	NA	Negative	27.97	Maybe	NA	Negative	10.13	Positive	NA	Negative	27.38	Maybe	NA	Negative	NA	Negative	28.03	Negative	NA	Negative	NA	Negative	NA	NonDetect	30.75
298	N092803	2015-09-28 04:47:35+00:00	2015-10-01 04:50:54+00:00	Netrakona	Maugati	Mara Dighi	28.1	Negative	NA	Negative	NA	Negative	NA	Negative	NA	Negative	31.61	Negative	30.8	Negative	NA	Negative	NA	Negative	NA	Negative	NA	Negative	NA	Negative	17.79	Positive	NA	Negative	NA	Negative	NA	Negative	NA	Negative	NA	Negative	NA	Negative	NA	Negative	NA	NonDetect	31.42
299	N092804	2015-09-28 02:20:02+00:00	2015-09-28 09:45:59+00:00	Netrakona	Amtala	Dugiarampur	NA	Negative	NA	Negative	NA	Negative	NA	Negative	NA	Negative	NA	Negative	NA	Negative	NA	Negative	NA	Negative	NA	Negative	NA	Negative	NA	Negative	23.93	Positive	NA	Negative	NA	Negative	NA	Negative	NA	Negative	NA	Negative	NA	Negative	24.085	Positive	NA	NonDetect	31.645
300	N092805	2015-09-28 03:39:13+00:00	2015-09-28 17:00:44+00:00	Netrakona	Rauha	Bara Gara	NA	Negative	NA	Negative	NA	Negative	NA	Negative	NA	Negative	NA	Negative	NA	Negative	NA	Negative	NA	Negative	NA	Negative	30.07	Negative	NA	Negative	16.97	Positive	NA	Negative	NA	Negative	NA	Negative	NA	Negative	NA	Negative	NA	Negative	NA	Negative	24.015	Positive	NA
301	N092806	2015-09-28 05:50:36+00:00	2015-09-28 08:30:51+00:00	Netrakona	Challisha	Rajendrapur	NA	NA	NA	NA	NA	NA	NA	NA	NA	NA	NA	NA	NA	NA	NA	NA	NA	NA	NA	NA	NA	NA	NA	NA	NA	NA	NA	NA	NA	NA	NA	NA	NA	NA	NA	NA	NA	NA	NA	NA	NA	NA	NA
302	N092901	2015-09-28 18:25:02+00:00	2015-09-29 04:19:29+00:00	Netrakona	Ward No-04	NA	NA	Negative	NA	Negative	NA	Negative	34.86	Negative	NA	Negative	NA	Negative	27.66	Maybe	34.41	Negative	NA	Negative	NA	Negative	34.17	Negative	NA	Negative	17.125	Positive	NA	Negative	NA	Negative	NA	Negative	NA	Negative	NA	Negative	NA	Negative	NA	Negative	NA	NonDetect	NA
303	N092902	2015-09-28 19:00:05+00:00	2015-09-29 04:00:50+00:00	Netrakona	Asujia	Singhergaon	NA	Negative	NA	Negative	NA	Negative	NA	Negative	27.135	Maybe	NA	Negative	NA	Negative	NA	Negative	NA	Negative	NA	Negative	34.75	Negative	NA	Negative	13.945	Positive	NA	Negative	NA	Negative	NA	Negative	NA	Negative	22.59	Positive	NA	Negative	NA	Negative	NA	NonDetect	NA
304	N092903	2015-09-28 20:00:45+00:00	2015-09-29 05:01:00+00:00	Netrakona	Singhar Bangla	Kandulia	NA	Negative	NA	Negative	NA	Negative	NA	Negative	29.005	Negative	NA	Negative	NA	Negative	NA	Negative	NA	Negative	NA	Negative	NA	Negative	NA	Negative	16.09	Positive	NA	Negative	28.64	Negative	19.265	Positive	NA	Negative	23.98	Positive	NA	Negative	NA	Negative	NA	NonDetect	31.58
305	N092904	2015-09-28 21:00:46+00:00	2015-09-29 06:08:29+00:00	Netrakona	Ward No-01	NA	NA	Negative	NA	Negative	NA	Negative	NA	Negative	32.25	Negative	NA	Negative	28.91	Negative	NA	Negative	NA	Negative	NA	Negative	NA	Negative	NA	Negative	17.645	Positive	NA	Negative	NA	Negative	NA	Negative	NA	Negative	28.1	Negative	NA	Negative	NA	Negative	NA	NonDetect	29.91
306	N092905	2015-09-29 03:01:06+00:00	2015-09-30 04:24:10+00:00	Netrakona	Madanpur	Lakshmipur	26.78	Maybe	NA	Negative	NA	Negative	NA	Negative	NA	Negative	NA	Negative	NA	Negative	NA	Negative	NA	Negative	NA	Negative	29.91	Negative	NA	Negative	11.06	Positive	NA	Negative	27.985	Maybe	NA	Negative	NA	Negative	NA	Negative	NA	Negative	28.38	Negative	29.76	Negative	29.82
307	N092906	2015-09-29 03:15:48+00:00	2015-09-30 05:00:10+00:00	Netrakona	Asujia	Asujia	NA	Negative	NA	Negative	NA	Negative	NA	Negative	NA	Negative	NA	Negative	NA	Negative	NA	Negative	NA	Negative	NA	Negative	NA	Negative	NA	Negative	16.2	Positive	NA	Negative	NA	Negative	NA	Negative	NA	Negative	27.71	Maybe	NA	Negative	NA	Negative	NA	NonDetect	NA
308	N092907	2015-09-29 05:30:17+00:00	2015-09-30 04:32:20+00:00	Netrakona	Kailati	Anantapur	NA	Negative	NA	Negative	NA	Negative	NA	Negative	29.885	Negative	NA	Negative	NA	Negative	NA	Negative	NA	Negative	NA	Negative	34.525	Negative	NA	Negative	13.905	Positive	NA	Negative	NA	Negative	NA	Negative	NA	Negative	NA	Negative	NA	Negative	NA	Negative	NA	NonDetect	32.795
309	N092908	2015-09-29 05:00:57+00:00	2015-09-30 05:00:24+00:00	Netrakona	Sahata	Madhupur	NA	Negative	NA	Negative	NA	Negative	NA	Negative	NA	Negative	NA	Negative	NA	Negative	33.21	Negative	NA	Negative	NA	Negative	NA	Negative	NA	Negative	15.205	Positive	NA	Negative	NA	Negative	NA	Negative	NA	Negative	NA	Negative	NA	Negative	NA	Negative	NA	NonDetect	34.52
310	N092909	2015-09-29 07:19:49+00:00	2015-09-30 05:42:44+00:00	Netrakona	Medni	Khar Bangla	25.55	Positive	NA	Negative	NA	Negative	NA	Negative	31.84	Negative	27.65	Maybe	NA	Negative	31.34	Negative	NA	Negative	NA	Negative	NA	Negative	NA	Negative	12.205	Positive	NA	Negative	NA	Negative	NA	Negative	34.82	Negative	NA	Negative	28.03	Negative	NA	Negative	NA	NonDetect	31.95
311	N092910	2015-09-29 07:50:13+00:00	2015-09-30 05:00:07+00:00	Netrakona	Thakurakona	Durgasram	NA	Negative	NA	Negative	NA	Negative	NA	Negative	33.575	Negative	NA	Negative	NA	Negative	NA	Negative	NA	Negative	NA	Negative	NA	Negative	NA	Negative	18.09	Positive	NA	Negative	NA	Negative	NA	Negative	NA	Negative	NA	Negative	27.75	Maybe	NA	Negative	NA	NonDetect	NA
312	N092911	2015-09-29 07:30:49+00:00	2015-09-30 05:22:47+00:00	Netrakona	Asujia	Rampur Durgasram	NA	Negative	NA	Negative	NA	Negative	NA	Negative	33.53	Negative	NA	Negative	NA	Negative	NA	Negative	NA	Negative	NA	Negative	NA	Negative	NA	Negative	14.6	Positive	NA	Negative	NA	Negative	NA	Negative	NA	Negative	NA	Negative	NA	Negative	NA	Negative	NA	NonDetect	NA
313	N092912	2015-09-29 10:30:01+00:00	2015-09-30 06:20:03+00:00	Netrakona	Ward No-01	Barsikura	NA	Negative	NA	Negative	NA	Negative	NA	Negative	NA	Negative	28.78	Negative	NA	Negative	NA	Negative	NA	Negative	NA	Negative	NA	Negative	NA	Negative	21.81	Positive	NA	Negative	NA	Negative	NA	Negative	NA	Negative	NA	Negative	NA	Negative	21.855	Positive	NA	NonDetect	30.58
314	N092913	2015-09-28 23:40:34+00:00	2015-09-30 07:30:00+00:00	Netrakona	Ward No-09	Parla	NA	Negative	NA	Negative	NA	Negative	NA	Negative	32.89	Negative	NA	Negative	NA	Negative	NA	Negative	NA	Negative	NA	Negative	NA	Negative	NA	Negative	16.995	Positive	NA	Negative	NA	Negative	NA	Negative	NA	Negative	19.57	Positive	NA	Negative	NA	Negative	NA	NonDetect	NA
315	N092914	2015-09-29 15:49:05+00:00	2015-10-02 04:00:29+00:00	Netrakona	Chirang	Saguli	NA	Negative	NA	Negative	NA	Negative	NA	Negative	33.09	Negative	NA	Negative	27.37	Maybe	NA	Negative	NA	Negative	NA	Negative	33.05	Negative	NA	Negative	17.065	Positive	NA	Negative	NA	Negative	NA	Negative	NA	Negative	25.58	Positive	NA	Negative	NA	Negative	NA	NonDetect	NA
316	N092915	2015-09-29 05:00:57+00:00	2015-10-01 04:13:32+00:00	Netrakona	Rauha	Teliganti	NA	Negative	NA	Negative	NA	Negative	NA	Negative	NA	Negative	NA	Negative	32.02	Negative	NA	Negative	NA	Negative	NA	Negative	NA	Negative	NA	Negative	19.67	Positive	NA	Negative	NA	Negative	28.08	Negative	NA	Negative	NA	Negative	NA	Negative	NA	Negative	NA	NonDetect	31.15
317	N093001	2015-09-30 01:35:27+00:00	2015-10-01 04:40:42+00:00	Netrakona	Challisha	Challisha	NA	NA	NA	NA	NA	NA	NA	NA	NA	NA	NA	NA	NA	NA	NA	NA	NA	NA	NA	NA	NA	NA	NA	NA	NA	NA	NA	NA	NA	NA	NA	NA	NA	NA	NA	NA	NA	NA	NA	NA	NA	NA	NA
318	N093002	2015-09-30 04:22:53+00:00	2015-10-02 04:48:28+00:00	Netrakona	Lakshmiganj	Boyraura	24.335	Positive	NA	Negative	NA	Negative	NA	Negative	NA	Negative	NA	Negative	NA	Negative	30.39	Negative	NA	Negative	NA	Negative	31.31	Negative	NA	Negative	10.56	Positive	NA	Negative	NA	Negative	NA	Negative	NA	Negative	NA	Negative	NA	Negative	NA	Negative	NA	NonDetect	NA
319	N093003	2015-09-30 04:55:43+00:00	2015-10-01 00:00:29+00:00	Netrakona	Dakshin Bishiura	Bara Nandura	NA	Negative	NA	Negative	NA	Negative	NA	Negative	NA	Negative	NA	Negative	NA	Negative	NA	Negative	NA	Negative	NA	Negative	NA	Negative	NA	Negative	20.935	Positive	NA	Negative	NA	Negative	NA	Negative	NA	Negative	NA	Negative	NA	Negative	NA	Negative	NA	NonDetect	31.495
320	N093004	2015-09-30 02:00:01+00:00	2015-10-01 04:50:38+00:00	Netrakona	Ward No-08	Nagra Dhakin	NA	Negative	NA	Negative	NA	Negative	NA	Negative	30.78	Negative	NA	Negative	27.695	Maybe	NA	Negative	NA	Negative	NA	Negative	NA	Negative	NA	Negative	16.445	Positive	NA	Negative	NA	Negative	NA	Negative	NA	Negative	28.36	Negative	NA	Negative	19.465	Positive	NA	NonDetect	31.045
321	N093005	2015-09-30 07:00:38+00:00	2015-10-01 05:00:02+00:00	Netrakona	Kailati	Kutubpur	NA	NA	NA	NA	NA	NA	NA	NA	NA	NA	NA	NA	NA	NA	NA	NA	NA	NA	NA	NA	NA	NA	NA	NA	NA	NA	NA	NA	NA	NA	NA	NA	NA	NA	NA	NA	NA	NA	NA	NA	NA	NA	NA
322	N093006	2015-09-30 08:00:21+00:00	2015-09-30 05:14:29+00:00	Netrakona	Ward No-05	Malni	NA	Negative	NA	Negative	NA	Negative	NA	Negative	NA	Negative	NA	Negative	NA	Negative	NA	Negative	NA	Negative	NA	Negative	NA	Negative	NA	Negative	20.485	Positive	NA	Negative	NA	Negative	NA	Negative	NA	Negative	NA	Negative	NA	Negative	NA	Negative	NA	NonDetect	NA
323	N093007	2015-09-30 08:00:26+00:00	NA	Netrakona	Ward No-01	Gram Satpai_(1)	NA	Negative	28.59	Negative	NA	Negative	NA	Negative	34.39	Negative	32.07	Negative	NA	Negative	NA	Negative	NA	Negative	NA	Negative	NA	Negative	NA	Negative	18.395	Positive	NA	Negative	NA	Negative	NA	Negative	NA	Negative	NA	Negative	NA	Negative	20.315	Positive	NA	NonDetect	29.79
324	N093008	2015-09-30 09:10:54+00:00	2015-10-01 01:00:40+00:00	Netrakona	Challisha	Uttar Bishiura	NA	Negative	NA	Negative	NA	Negative	NA	Negative	27.35	Maybe	25.065	Positive	NA	Negative	33.31	Negative	NA	Negative	NA	Negative	35	Negative	NA	Negative	14.67	Positive	NA	Negative	NA	Negative	NA	Negative	NA	Negative	27.85	Maybe	NA	Negative	NA	Negative	NA	NonDetect	NA
325	N093009	2007-09-30 10:25:52+00:00	2015-10-01 04:50:16+00:00	Netrakona	Amtala	Bishwanathpur	25.225	Positive	NA	Negative	NA	Negative	NA	Negative	NA	Negative	NA	Negative	30.25	Negative	NA	Negative	NA	Negative	NA	Negative	NA	Negative	NA	Negative	16.425	Positive	NA	Negative	NA	Negative	NA	Negative	NA	Negative	NA	Negative	NA	Negative	NA	Negative	NA	NonDetect	NA
326	N093010	2015-09-30 11:16:56+00:00	2015-10-01 04:20:03+00:00	Netrakona	Kailati	Bara Kailati	NA	Negative	NA	Negative	NA	Negative	NA	Negative	NA	Negative	NA	Negative	NA	Negative	NA	Negative	NA	Negative	NA	Negative	NA	Negative	NA	Negative	23.925	Positive	NA	Negative	NA	Negative	NA	Negative	NA	Negative	NA	Negative	NA	Negative	NA	Negative	NA	NonDetect	31.345
327	N093011	2015-09-30 15:10:22+00:00	2015-10-02 03:15:54+00:00	Netrakona	Singhar Bangla	Kandulia	NA	Negative	NA	Negative	NA	Negative	NA	Negative	NA	Negative	NA	Negative	NA	Negative	NA	Negative	NA	Negative	NA	Negative	NA	Negative	NA	Negative	14.73	Positive	NA	Negative	NA	Negative	NA	Negative	NA	Negative	NA	Negative	NA	Negative	NA	Negative	NA	NonDetect	33.84
328	N100101	2015-10-01 03:50:53+00:00	2015-10-01 09:55:46+00:00	Netrakona	Maugati	NA	22.72	Positive	NA	Negative	NA	Negative	NA	Negative	NA	Negative	NA	Negative	NA	Negative	NA	Negative	NA	Negative	NA	Negative	NA	Negative	NA	Negative	16.72	Positive	NA	Negative	NA	Negative	NA	Negative	NA	Negative	NA	Negative	NA	Negative	NA	Negative	NA	NonDetect	33.435
329	N100102	2015-10-01 06:40:17+00:00	2015-10-03 04:13:31+00:00	Netrakona	Noapara	Bahuli	NA	Negative	NA	Negative	NA	Negative	NA	Negative	29.04	Negative	NA	Negative	NA	Negative	NA	Negative	NA	Negative	NA	Negative	34.63	Negative	NA	Negative	14.675	Positive	NA	Negative	NA	Negative	NA	Negative	NA	Negative	NA	Negative	NA	Negative	NA	Negative	28.75	Negative	31.62
330	N100103	2015-10-01 06:53:11+00:00	2015-10-03 04:10:32+00:00	Netrakona	Maugati	Satpati	33.24	Negative	NA	Negative	NA	Negative	NA	Negative	30.915	Negative	NA	Negative	NA	Negative	30.755	Negative	NA	Negative	NA	Negative	32.67	Negative	NA	Negative	12.965	Positive	NA	Negative	NA	Negative	NA	Negative	NA	Negative	NA	Negative	NA	Negative	21.35	Positive	NA	NonDetect	32.52
331	N100104	2015-10-01 07:11:31+00:00	2015-10-02 05:00:43+00:00	Netrakona	Rauha	Karli	NA	Negative	NA	Negative	NA	Negative	NA	Negative	30.39	Negative	28.92	Negative	NA	Negative	33.54	Negative	NA	Negative	NA	Negative	29.44	Negative	NA	Negative	11.7	Positive	NA	Negative	NA	Negative	NA	Negative	33.39	Negative	NA	Negative	NA	Negative	28.23	Negative	NA	NonDetect	31.22
332	N100105	2015-10-01 09:00:14+00:00	2015-10-01 05:00:31+00:00	Netrakona	Sahata	Hiluchia	NA	Negative	NA	Negative	NA	Negative	NA	Negative	NA	Negative	NA	Negative	NA	Negative	NA	Negative	NA	Negative	NA	Negative	NA	Negative	NA	Negative	23.345	Positive	NA	Negative	NA	Negative	NA	Negative	NA	Negative	NA	Negative	NA	Negative	NA	Negative	NA	NonDetect	31.175
333	N100106	2015-10-01 09:02:06+00:00	2015-10-25 15:00:50+00:00	Netrakona	Kailati	Kakuria Masim	NA	Negative	NA	Negative	NA	Negative	NA	Negative	29.91	Negative	NA	Negative	NA	Negative	NA	Negative	NA	Negative	NA	Negative	NA	Negative	NA	Negative	14.125	Positive	NA	Negative	NA	Negative	NA	Negative	NA	Negative	26.07	Maybe	NA	Negative	NA	Negative	NA	NonDetect	NA
334	N100301	2015-10-03 02:46:51+00:00	2015-10-03 10:41:10+00:00	Netrakona	Challisha	Challisha	NA	Negative	NA	Negative	NA	Negative	NA	Negative	NA	Negative	NA	Negative	NA	Negative	NA	Negative	NA	Negative	NA	Negative	21.545	Positive	NA	Negative	15.57	Positive	NA	Negative	NA	Negative	NA	Negative	NA	Negative	27.705	Maybe	NA	Negative	NA	Negative	NA	NonDetect	29.85
335	N100302	2015-10-03 03:30:50+00:00	2015-10-04 04:05:46+00:00	Netrakona	Ward No-09	Parla	NA	NA	NA	NA	NA	NA	NA	NA	NA	NA	NA	NA	NA	NA	NA	NA	NA	NA	NA	NA	NA	NA	NA	NA	NA	NA	NA	NA	NA	NA	NA	NA	NA	NA	NA	NA	NA	NA	NA	NA	NA	NA	NA
336	N100303	2015-10-03 05:00:54+00:00	2015-10-04 04:00:50+00:00	Netrakona	Medni	Khar Bangla	NA	Negative	NA	Negative	NA	Negative	NA	Negative	32.57	Negative	27.56	Maybe	NA	Negative	NA	Negative	NA	Negative	NA	Negative	NA	Negative	NA	Negative	15.36	Positive	NA	Negative	NA	Negative	NA	Negative	NA	Negative	NA	Negative	NA	Negative	NA	Negative	NA	NonDetect	NA
337	N100304	2015-10-02 18:55:38+00:00	2015-10-03 11:04:04+00:00	Netrakona	Challisha	Sreedharpur	NA	NA	NA	NA	NA	NA	NA	NA	NA	NA	NA	NA	NA	NA	NA	NA	NA	NA	NA	NA	NA	NA	NA	NA	NA	NA	NA	NA	NA	NA	NA	NA	NA	NA	NA	NA	NA	NA	NA	NA	NA	NA	NA
338	N100305	2015-10-03 02:15:35+00:00	2015-10-04 04:05:59+00:00	Netrakona	Sarmaisa	Desiura	NA	Negative	NA	Negative	NA	Negative	NA	Negative	NA	Negative	NA	Negative	29.15	Negative	NA	Negative	NA	Negative	NA	Negative	NA	Negative	NA	Negative	19.59	Positive	NA	Negative	NA	Negative	NA	Negative	NA	Negative	NA	Negative	NA	Negative	NA	Negative	NA	NonDetect	34.9
339	N100401	2015-10-03 22:30:08+00:00	2015-10-04 03:50:43+00:00	Netrakona	Ward No-08	Nagra Pashim	NA	Negative	NA	Negative	NA	Negative	NA	Negative	28.995	Negative	NA	Negative	25.57	Positive	NA	Negative	NA	Negative	NA	Negative	NA	Negative	NA	Negative	16.445	Positive	NA	Negative	NA	Negative	NA	Negative	NA	Negative	NA	Negative	NA	Negative	NA	Negative	NA	NonDetect	33.34
340	N100402	2015-10-04 01:29:41+00:00	NA	Netrakona	Challisha	Lait	NA	Negative	NA	Negative	NA	Negative	NA	Negative	28.04	Negative	NA	Negative	23.64	Positive	34.94	Negative	NA	Negative	NA	Negative	31.06	Negative	NA	Negative	15.56	Positive	NA	Negative	NA	Negative	NA	Negative	NA	Negative	NA	Negative	NA	Negative	23.065	Positive	NA	NonDetect	NA
341	N100403	2015-10-04 03:00:06+00:00	NA	Netrakona	Ward No-01	Gram Satpai_(1)	NA	Negative	NA	Negative	NA	Negative	NA	Negative	33.88	Negative	NA	Negative	30.145	Negative	NA	Negative	NA	Negative	NA	Negative	34.79	Negative	NA	Negative	19.915	Positive	NA	Negative	NA	Negative	NA	Negative	NA	Negative	NA	Negative	NA	Negative	NA	Negative	NA	NonDetect	NA
342	N100404	2015-10-04 04:38:42+00:00	2015-10-06 05:15:54+00:00	Netrakona	Amtala	Shibprasadpur	NA	Negative	NA	Negative	NA	Negative	NA	Negative	NA	Negative	NA	Negative	22.15	Positive	NA	Negative	NA	Negative	NA	Negative	34.37	Negative	NA	Negative	14.305	Positive	NA	Negative	27.8	Maybe	NA	Negative	NA	Negative	NA	Negative	NA	Negative	NA	Negative	NA	NonDetect	33.12
343	N100405	2015-10-04 05:41:51+00:00	2015-10-05 05:30:50+00:00	Netrakona	Rauha	Amli Keshabpur	NA	Negative	NA	Negative	NA	Negative	NA	Negative	31.26	Negative	NA	Negative	NA	Negative	NA	Negative	NA	Negative	NA	Negative	34.03	Negative	NA	Negative	16.22	Positive	NA	Negative	NA	Negative	NA	Negative	NA	Negative	NA	Negative	NA	Negative	NA	Negative	NA	NonDetect	NA
344	N100406	2015-10-04 08:30:22+00:00	2015-10-05 01:00:10+00:00	Netrakona	Ward No-04	Bahircha Para	NA	NA	NA	NA	NA	NA	NA	NA	NA	NA	NA	NA	NA	NA	NA	NA	NA	NA	NA	NA	NA	NA	NA	NA	NA	NA	NA	NA	NA	NA	NA	NA	NA	NA	NA	NA	NA	NA	NA	NA	NA	NA	NA
345	N100407	2015-10-04 09:00:45+00:00	2015-10-06 06:31:57+00:00	Netrakona	Maugati	Mara Dighi	NA	Negative	NA	Negative	NA	Negative	NA	Negative	NA	Negative	NA	Negative	NA	Negative	NA	Negative	NA	Negative	NA	Negative	NA	Negative	NA	Negative	23.335	Positive	NA	Negative	NA	Negative	NA	Negative	NA	Negative	NA	Negative	NA	Negative	NA	Negative	NA	NonDetect	NA
346	N100408	2015-10-04 10:00:40+00:00	2015-10-05 05:00:46+00:00	Netrakona	Singhar Bangla	Mymensingh Ruhi	23.69	Positive	NA	Negative	NA	Negative	NA	Negative	NA	Negative	26.125	Maybe	NA	Negative	NA	Negative	NA	Negative	NA	Negative	31.26	Negative	NA	Negative	13.6	Positive	NA	Negative	NA	Negative	NA	Negative	NA	Negative	32.67	Negative	NA	Negative	NA	Negative	NA	NonDetect	27.735
347	N100409	2015-10-04 17:43:28+00:00	2015-10-05 01:30:42+00:00	Netrakona	Rauha	Amli Keshabpur	NA	Negative	NA	Negative	NA	Negative	NA	Negative	NA	Negative	NA	Negative	NA	Negative	NA	Negative	NA	Negative	NA	Negative	34.43	Negative	NA	Negative	24.885	Positive	NA	Negative	NA	Negative	NA	Negative	NA	Negative	NA	Negative	NA	Negative	NA	Negative	NA	NonDetect	NA
348	N100501	2015-10-04 22:53:39+00:00	2015-10-06 07:29:12+00:00	Netrakona	Ward No-08	Nagra Uttar	NA	Negative	NA	Negative	NA	Negative	NA	Negative	NA	Negative	NA	Negative	NA	Negative	NA	Negative	NA	Negative	NA	Negative	NA	Negative	NA	Negative	20.235	Positive	NA	Negative	NA	Negative	NA	Negative	NA	Negative	NA	Negative	NA	Negative	NA	Negative	24.795	Positive	33.57
349	N100502	2015-10-05 00:30:34+00:00	2015-10-05 08:30:45+00:00	Netrakona	Singhar Bangla	Faridpur	26.06	Maybe	NA	Negative	NA	Negative	NA	Negative	NA	Negative	NA	Negative	NA	Negative	NA	Negative	NA	Negative	NA	Negative	NA	Negative	NA	Negative	18.275	Positive	NA	Negative	NA	Negative	NA	Negative	NA	Negative	22.2	Positive	NA	Negative	NA	Negative	NA	NonDetect	NA
350	N100503	2015-10-05 04:15:08+00:00	2015-10-06 07:22:29+00:00	Netrakona	Ward No-08	Nagra Uttar	NA	Negative	NA	Negative	NA	Negative	NA	Negative	33.415	Negative	NA	Negative	NA	Negative	NA	Negative	NA	Negative	NA	Negative	34.13	Negative	NA	Negative	13.21	Positive	NA	Negative	NA	Negative	NA	Negative	NA	Negative	NA	Negative	NA	Negative	21.1	Positive	17.675	Positive	31.16
351	N100504	2015-10-05 05:15:58+00:00	2015-10-07 04:18:02+00:00	Netrakona	Ward No-08	Nagra Pashim	NA	Negative	NA	Negative	NA	Negative	NA	Negative	NA	Negative	NA	Negative	NA	Negative	NA	Negative	NA	Negative	NA	Negative	NA	Negative	NA	Negative	19.31	Positive	NA	Negative	NA	Negative	NA	Negative	NA	Negative	NA	Negative	NA	Negative	NA	Negative	NA	NonDetect	NA
352	N100505	2015-10-05 06:30:56+00:00	2015-10-06 00:00:28+00:00	Netrakona	Kailati	Phaiska	NA	Negative	NA	Negative	NA	Negative	NA	Negative	NA	Negative	NA	Negative	NA	Negative	NA	Negative	NA	Negative	NA	Negative	NA	Negative	NA	Negative	18.855	Positive	NA	Negative	NA	Negative	25.39	Positive	24.865	Positive	NA	Negative	NA	Negative	NA	Negative	NA	NonDetect	NA
353	N100506	2015-10-05 07:15:06+00:00	2015-10-06 07:18:06+00:00	Netrakona	Ward No-07	Katly	NA	NA	NA	NA	NA	NA	NA	NA	NA	NA	NA	NA	NA	NA	NA	NA	NA	NA	NA	NA	NA	NA	NA	NA	NA	NA	NA	NA	NA	NA	NA	NA	NA	NA	NA	NA	NA	NA	NA	NA	NA	NA	NA
354	N100507	2015-10-05 07:50:58+00:00	2015-10-06 07:14:23+00:00	Netrakona	Kailati	Phaiska	NA	NA	NA	NA	NA	NA	NA	NA	NA	NA	NA	NA	NA	NA	NA	NA	NA	NA	NA	NA	NA	NA	NA	NA	NA	NA	NA	NA	NA	NA	NA	NA	NA	NA	NA	NA	NA	NA	NA	NA	NA	NA	NA
355	N100508	2015-10-05 08:00:23+00:00	2015-10-05 10:45:28+00:00	Netrakona	Rauha	Bara Gara	NA	NA	NA	NA	NA	NA	NA	NA	NA	NA	NA	NA	NA	NA	NA	NA	NA	NA	NA	NA	NA	NA	NA	NA	NA	NA	NA	NA	NA	NA	NA	NA	NA	NA	NA	NA	NA	NA	NA	NA	NA	NA	NA
356	N100509	2015-10-05 10:10:22+00:00	2015-10-07 04:13:04+00:00	Netrakona	Ward No-02	Satpai Town	27.64	Maybe	NA	Negative	NA	Negative	NA	Negative	NA	Negative	NA	Negative	NA	Negative	NA	Negative	NA	Negative	NA	Negative	NA	Negative	NA	Negative	17.62	Positive	NA	Negative	NA	Negative	NA	Negative	NA	Negative	NA	Negative	NA	Negative	NA	Negative	NA	NonDetect	NA
357	N100510	2015-10-05 17:15:09+00:00	2015-10-07 04:13:50+00:00	Netrakona	Ward No-09	Hossain Pur	NA	Negative	NA	Negative	NA	Negative	NA	Negative	NA	Negative	NA	Negative	NA	Negative	NA	Negative	NA	Negative	NA	Negative	NA	Negative	NA	Negative	26.34	Maybe	NA	Negative	NA	Negative	NA	Negative	NA	Negative	NA	Negative	NA	Negative	NA	Negative	NA	NonDetect	NA
358	N100601	2015-10-05 18:15:11+00:00	2015-10-06 07:30:20+00:00	Netrakona	Medni	Khar Bangla	NA	Negative	NA	Negative	NA	Negative	NA	Negative	NA	Negative	NA	Negative	NA	Negative	32.515	Negative	NA	Negative	NA	Negative	32.67	Negative	NA	Negative	15.84	Positive	NA	Negative	NA	Negative	NA	Negative	NA	Negative	NA	Negative	NA	Negative	NA	Negative	NA	NonDetect	NA
359	N100602	2015-10-06 01:45:23+00:00	2015-10-06 05:58:56+00:00	Netrakona	Kailati	Kailati	NA	Negative	NA	Negative	NA	Negative	NA	Negative	NA	Negative	NA	Negative	NA	Negative	32.285	Negative	NA	Negative	NA	Negative	33.97	Negative	NA	Negative	15.25	Positive	NA	Negative	NA	Negative	NA	Negative	NA	Negative	NA	Negative	NA	Negative	NA	Negative	NA	NonDetect	NA
360	N100603	2015-10-06 08:50:36+00:00	2015-10-06 10:45:01+00:00	Netrakona	NA	NA	NA	Negative	NA	Negative	NA	Negative	NA	Negative	NA	Negative	NA	Negative	NA	Negative	NA	Negative	NA	Negative	NA	Negative	NA	Negative	NA	Negative	17.74	Positive	NA	Negative	NA	Negative	NA	Negative	NA	Negative	NA	Negative	NA	Negative	NA	Negative	NA	NonDetect	NA
361	N100604	2015-10-06 09:10:28+00:00	2015-10-07 04:49:27+00:00	Netrakona	Barhatta	Mohanpur	NA	Negative	NA	Negative	NA	Negative	NA	Negative	34.705	Negative	NA	Negative	NA	Negative	NA	Negative	30.22	Negative	NA	Negative	NA	Negative	NA	Negative	20.255	Positive	NA	Negative	NA	Negative	NA	Negative	NA	Negative	NA	Negative	NA	Negative	NA	Negative	NA	NonDetect	NA
362	N100605	2015-10-06 16:25:49+00:00	2015-10-07 09:15:03+00:00	Netrakona	Ward No-08	Nagra Pashim	NA	Negative	NA	Negative	NA	Negative	NA	Negative	32.22	Negative	23.755	Positive	NA	Negative	34.2	Negative	NA	Negative	NA	Negative	30.085	Negative	NA	Negative	12.6	Positive	NA	Negative	NA	Negative	NA	Negative	NA	Negative	33.68	Negative	NA	Negative	NA	Negative	17.585	Positive	31.36
363	N100701	2015-10-06 21:30:36+00:00	2015-10-08 04:42:33+00:00	Netrakona	Sahata	Madhupur	NA	Negative	NA	Negative	NA	Negative	NA	Negative	NA	Negative	NA	Negative	NA	Negative	NA	Negative	28.37	Negative	NA	Negative	NA	Negative	NA	Negative	22.905	Positive	NA	Negative	NA	Negative	NA	Negative	NA	Negative	NA	Negative	NA	Negative	NA	Negative	NA	NonDetect	NA
364	N100702	2015-10-07 04:00:59+00:00	2015-10-08 04:14:09+00:00	Netrakona	Challisha	Rajendrapur	NA	Negative	NA	Negative	NA	Negative	NA	Negative	NA	Negative	NA	Negative	NA	Negative	NA	Negative	NA	Negative	NA	Negative	NA	Negative	NA	Negative	26.805	Maybe	NA	Negative	NA	Negative	NA	Negative	NA	Negative	NA	Negative	NA	Negative	NA	Negative	NA	NonDetect	NA
365	N100703	2015-10-07 04:10:43+00:00	2015-10-07 11:31:33+00:00	Netrakona	Medni	Khar Bangla	NA	Negative	NA	Negative	NA	Negative	NA	Negative	NA	Negative	NA	Negative	NA	Negative	NA	Negative	NA	Negative	NA	Negative	NA	Negative	NA	Negative	23.035	Positive	NA	Negative	NA	Negative	NA	Negative	NA	Negative	NA	Negative	NA	Negative	NA	Negative	NA	NonDetect	NA
366	N100704	2015-10-07 04:20:51+00:00	2015-10-09 04:00:40+00:00	Netrakona	Challisha	Dariyagi	NA	Negative	NA	Negative	NA	Negative	NA	Negative	34.2	Negative	NA	Negative	NA	Negative	NA	Negative	NA	Negative	NA	Negative	NA	Negative	NA	Negative	20.015	Positive	NA	Negative	NA	Negative	NA	Negative	NA	Negative	NA	Negative	NA	Negative	NA	Negative	NA	NonDetect	NA
367	N100705	2015-10-07 09:10:18+00:00	2015-10-08 05:30:36+00:00	Netrakona	Teligati	Bijoypur	NA	Negative	NA	Negative	NA	Negative	NA	Negative	NA	Negative	NA	Negative	NA	Negative	NA	Negative	NA	Negative	NA	Negative	NA	Negative	NA	Negative	23.95	Positive	NA	Negative	NA	Negative	NA	Negative	NA	Negative	NA	Negative	NA	Negative	NA	Negative	NA	NonDetect	NA
368	N100706	2015-10-07 12:33:41+00:00	2015-10-08 12:00:45+00:00	Netrakona	Barhatta	Kastala	NA	Negative	NA	Negative	NA	Negative	NA	Negative	NA	Negative	NA	Negative	25.59	Positive	NA	Negative	NA	Negative	NA	Negative	NA	Negative	NA	Negative	16.635	Positive	NA	Negative	NA	Negative	NA	Negative	NA	Negative	27.19	Maybe	NA	Negative	NA	Negative	NA	NonDetect	NA
369	N100707	2015-10-07 13:20:18+00:00	2015-10-08 04:17:40+00:00	Netrakona	Narandia	Iaran	NA	NA	NA	NA	NA	NA	NA	NA	NA	NA	NA	NA	NA	NA	NA	NA	NA	NA	NA	NA	NA	NA	NA	NA	NA	NA	NA	NA	NA	NA	NA	NA	NA	NA	NA	NA	NA	NA	NA	NA	NA	NA	NA
370	N100708	2015-10-07 13:50:59+00:00	2015-10-10 04:23:44+00:00	Netrakona	Sahata	Sahata	NA	Negative	NA	Negative	NA	Negative	NA	Negative	NA	Negative	NA	Negative	NA	Negative	NA	Negative	NA	Negative	NA	Negative	NA	Negative	NA	Negative	NA	Negative	NA	Negative	NA	Negative	NA	Negative	NA	Negative	NA	Negative	NA	Negative	NA	Negative	NA	NonDetect	NA
371	N100709	2015-10-07 16:10:32+00:00	2015-10-09 04:00:18+00:00	Netrakona	Medni	Kamalpur Jugati	NA	Negative	NA	Negative	NA	Negative	NA	Negative	NA	Negative	NA	Negative	NA	Negative	NA	Negative	NA	Negative	NA	Negative	NA	Negative	NA	Negative	21.5	Positive	NA	Negative	NA	Negative	NA	Negative	NA	Negative	NA	Negative	NA	Negative	28.19	Negative	NA	NonDetect	NA
372	N100801	2015-10-08 10:00:38+00:00	2015-10-08 16:00:46+00:00	Netrakona	NA	NA	NA	Negative	NA	Negative	NA	Negative	NA	Negative	NA	Negative	NA	Negative	NA	Negative	NA	Negative	34.08	Negative	NA	Negative	NA	Negative	NA	Negative	23.24	Positive	NA	Negative	NA	Negative	NA	Negative	NA	Negative	NA	Negative	NA	Negative	NA	Negative	NA	NonDetect	NA
373	N101001	2015-10-09 19:00:18+00:00	2015-10-10 07:00:27+00:00	Netrakona	Ward No-02	Satpai Town	NA	Negative	NA	Negative	NA	Negative	NA	Negative	32.855	Negative	NA	Negative	NA	Negative	NA	Negative	NA	Negative	NA	Negative	34.15	Negative	NA	Negative	12.105	Positive	NA	Negative	NA	Negative	NA	Negative	NA	Negative	28.14	Negative	NA	Negative	NA	Negative	NA	NonDetect	NA
374	N101002	2015-10-10 00:40:40+00:00	2015-10-10 11:03:12+00:00	Netrakona	Ward No-05	Islampur	NA	Negative	NA	Negative	NA	Negative	NA	Negative	34.01	Negative	NA	Negative	NA	Negative	NA	Negative	NA	Negative	NA	Negative	NA	Negative	NA	Negative	16.985	Positive	NA	Negative	NA	Negative	NA	Negative	NA	Negative	NA	Negative	NA	Negative	NA	Negative	NA	NonDetect	NA
375	N101003	2015-10-10 08:53:22+00:00	2015-10-11 05:30:31+00:00	Netrakona	Madanpur	Madanpur	NA	Negative	NA	Negative	NA	Negative	NA	Negative	NA	Negative	NA	Negative	NA	Negative	NA	Negative	NA	Negative	NA	Negative	NA	Negative	NA	Negative	26.28	Maybe	NA	Negative	NA	Negative	NA	Negative	NA	Negative	NA	Negative	NA	Negative	NA	Negative	NA	NonDetect	NA
376	N101004	2015-10-10 09:02:57+00:00	2015-10-11 04:46:33+00:00	Netrakona	Ward No-09	Challisa Kanda	NA	Negative	NA	Negative	NA	Negative	NA	Negative	NA	Negative	NA	Negative	28.67	Negative	NA	Negative	NA	Negative	NA	Negative	NA	Negative	NA	Negative	20.045	Positive	NA	Negative	NA	Negative	NA	Negative	NA	Negative	NA	Negative	NA	Negative	NA	Negative	23.455	Positive	32.92
377	N101005	2015-10-10 09:51:07+00:00	2015-10-11 07:09:07+00:00	Netrakona	Ward No-01	Gram Satpai_(1)	NA	Negative	NA	Negative	NA	Negative	NA	Negative	NA	Negative	NA	Negative	NA	Negative	NA	Negative	NA	Negative	NA	Negative	NA	Negative	NA	Negative	19.785	Positive	NA	Negative	NA	Negative	NA	Negative	NA	Negative	NA	Negative	NA	Negative	NA	Negative	NA	NonDetect	33.64
378	N101101	2015-10-10 20:00:41+00:00	2015-10-11 04:10:41+00:00	Netrakona	Narandia	Bhughi	NA	Negative	NA	Negative	NA	Negative	NA	Negative	NA	Negative	NA	Negative	NA	Negative	NA	Negative	NA	Negative	NA	Negative	NA	Negative	NA	Negative	18.905	Positive	NA	Negative	NA	Negative	NA	Negative	NA	Negative	NA	Negative	NA	Negative	NA	Negative	NA	NonDetect	27.055
379	N101102	2015-10-11 01:30:07+00:00	2015-10-12 04:12:35+00:00	Netrakona	Dakshin Bishiura	Sreepur Bali	NA	Negative	NA	Negative	NA	Negative	NA	Negative	NA	Negative	NA	Negative	NA	Negative	NA	Negative	NA	Negative	NA	Negative	NA	Negative	NA	Negative	23.13	Positive	NA	Negative	NA	Negative	NA	Negative	NA	Negative	26.13	Maybe	NA	Negative	NA	Negative	NA	NonDetect	NA
380	N101103	2015-10-11 02:45:56+00:00	2015-10-12 12:00:44+00:00	Netrakona	Medni	Burkhila	NA	Negative	NA	Negative	NA	Negative	NA	Negative	NA	Negative	NA	Negative	NA	Negative	NA	Negative	NA	Negative	NA	Negative	NA	Negative	NA	Negative	19.045	Positive	NA	Negative	NA	Negative	NA	Negative	NA	Negative	NA	Negative	NA	Negative	NA	Negative	NA	NonDetect	NA
381	N101104	2015-10-11 03:35:22+00:00	2015-10-12 04:09:44+00:00	Netrakona	Dhala Mulgaon	Salthi	NA	Negative	NA	Negative	NA	Negative	NA	Negative	NA	Negative	NA	Negative	NA	Negative	NA	Negative	NA	Negative	NA	Negative	NA	Negative	NA	Negative	25.915	Positive	NA	Negative	NA	Negative	NA	Negative	NA	Negative	NA	Negative	NA	Negative	NA	Negative	NA	NonDetect	NA
382	N101105	2015-10-11 06:15:56+00:00	2015-10-12 04:15:43+00:00	Netrakona	Kailati	Battala	NA	Negative	NA	Negative	NA	Negative	NA	Negative	NA	Negative	NA	Negative	NA	Negative	NA	Negative	NA	Negative	NA	Negative	NA	Negative	NA	Negative	30.005	Negative	NA	Negative	NA	Negative	NA	Negative	NA	Negative	NA	Negative	NA	Negative	NA	Negative	NA	NonDetect	NA
383	N101106	2015-10-11 06:10:04+00:00	2015-10-12 04:16:14+00:00	Netrakona	Maugati	Mankandia	NA	Negative	NA	Negative	NA	Negative	NA	Negative	32.45	Negative	NA	Negative	NA	Negative	NA	Negative	NA	Negative	NA	Negative	NA	Negative	NA	Negative	18.875	Positive	NA	Negative	NA	Negative	NA	Negative	NA	Negative	NA	Negative	NA	Negative	NA	Negative	NA	NonDetect	NA
384	N101107	2015-10-11 08:35:49+00:00	2015-10-12 00:30:27+00:00	Netrakona	Ward No-03	Pukuria	NA	Negative	NA	Negative	NA	Negative	NA	Negative	33.8	Negative	NA	Negative	NA	Negative	34.49	Negative	NA	Negative	NA	Negative	29.235	Negative	NA	Negative	12.29	Positive	NA	Negative	NA	Negative	NA	Negative	27.46	Maybe	NA	Negative	NA	Negative	27.585	Maybe	NA	NonDetect	33.08
385	N101108	2015-10-11 12:00:55+00:00	2015-10-14 04:00:12+00:00	Netrakona	Chhiram	Khaikona	NA	Negative	NA	Negative	NA	Negative	NA	Negative	33.09	Negative	24.825	Positive	NA	Negative	34.59	Negative	NA	Negative	NA	Negative	NA	Negative	NA	Negative	19.91	Positive	NA	Negative	NA	Negative	NA	Negative	NA	Negative	NA	Negative	NA	Negative	21.51	Positive	NA	NonDetect	29.975
386	N101109	2015-10-11 12:15:18+00:00	2015-10-13 04:33:28+00:00	Netrakona	Dhala Mulgaon	Dhala Mulgaon	NA	Negative	NA	Negative	NA	Negative	NA	Negative	NA	Negative	27.78	Maybe	29.74	Negative	NA	Negative	NA	Negative	NA	Negative	31.45	Negative	NA	Negative	15.15	Positive	NA	Negative	NA	Negative	NA	Negative	NA	Negative	NA	Negative	NA	Negative	NA	Negative	NA	NonDetect	28.39
387	N101110	2015-10-11 16:12:44+00:00	2015-10-13 04:41:54+00:00	Netrakona	Ward No-03	Mahamudpur	NA	Negative	NA	Negative	NA	Negative	NA	Negative	NA	Negative	NA	Negative	NA	Negative	NA	Negative	NA	Negative	NA	Negative	NA	Negative	NA	Negative	18.185	Positive	NA	Negative	NA	Negative	NA	Negative	NA	Negative	NA	Negative	NA	Negative	NA	Negative	NA	NonDetect	34.38
388	N101201	2015-10-12 02:00:18+00:00	2015-10-13 04:50:22+00:00	Netrakona	Challisha	Mymensingh Jhausi	NA	Negative	NA	Negative	NA	Negative	NA	Negative	NA	Negative	NA	Negative	NA	Negative	NA	Negative	NA	Negative	NA	Negative	31.385	Negative	NA	Negative	18.425	Positive	NA	Negative	NA	Negative	NA	Negative	NA	Negative	NA	Negative	NA	Negative	NA	Negative	NA	NonDetect	NA
389	N101202	2015-10-12 05:00:13+00:00	2015-10-13 05:09:32+00:00	Netrakona	Ward No-07	Katly	NA	Negative	NA	Negative	NA	Negative	NA	Negative	NA	Negative	NA	Negative	NA	Negative	33.945	Negative	NA	Negative	NA	Negative	NA	Negative	NA	Negative	15.045	Positive	NA	Negative	NA	Negative	NA	Negative	NA	Negative	NA	Negative	NA	Negative	NA	Negative	NA	NonDetect	31.18
390	N101203	2015-10-12 05:00:59+00:00	2015-10-12 10:00:59+00:00	Netrakona	Ward No-03	Pukuria	NA	Negative	NA	Negative	NA	Negative	NA	Negative	33.81	Negative	NA	Negative	29.34	Negative	26.19	Maybe	NA	Negative	NA	Negative	28.535	Negative	NA	Negative	10.335	Positive	NA	Negative	28.58	Negative	NA	Negative	NA	Negative	NA	Negative	NA	Negative	28.84	Negative	NA	NonDetect	33.47
391	N101204	2015-10-12 11:41:13+00:00	2015-10-13 05:40:44+00:00	Netrakona	Rauha	Kachuduari	NA	Negative	NA	Negative	NA	Negative	NA	Negative	31.785	Negative	NA	Negative	NA	Negative	33.55	Negative	NA	Negative	NA	Negative	29.02	Negative	NA	Negative	16.055	Positive	NA	Negative	NA	Negative	NA	Negative	NA	Negative	NA	Negative	NA	Negative	NA	Negative	NA	NonDetect	NA
392	N101205	2015-10-12 15:15:14+00:00	2015-10-14 04:00:43+00:00	Netrakona	Sahata	Mymensingh Dhoharpara	NA	Negative	NA	Negative	NA	Negative	NA	Negative	30.705	Negative	NA	Negative	26.62	Maybe	28.2	Negative	NA	Negative	NA	Negative	28.39	Negative	NA	Negative	11.65	Positive	NA	Negative	NA	Negative	NA	Negative	31.16	Negative	25.37	Positive	28.18	Negative	31.87	Negative	NA	NonDetect	32.855
393	N101301	2015-10-13 03:00:44+00:00	2015-10-13 09:50:04+00:00	Netrakona	Ward No-08	Nagra Pashim	NA	Negative	NA	Negative	NA	Negative	NA	Negative	32.245	Negative	NA	Negative	NA	Negative	NA	Negative	NA	Negative	NA	Negative	NA	Negative	NA	Negative	13.525	Positive	NA	Negative	NA	Negative	NA	Negative	NA	Negative	NA	Negative	NA	Negative	NA	Negative	17.825	Positive	34.11
394	N101302	2015-10-13 03:15:53+00:00	2015-10-14 04:00:28+00:00	Netrakona	Singhar Bangla	Faridpur	29.34	Negative	NA	Negative	NA	Negative	NA	Negative	NA	Negative	NA	Negative	NA	Negative	NA	Negative	27.63	Maybe	NA	Negative	34.47	Negative	NA	Negative	14.95	Positive	NA	Negative	27.78	Maybe	NA	Negative	34.68	Negative	NA	Negative	NA	Negative	34.25	Negative	27.86	Maybe	NA
395	N101303	2015-10-13 08:40:45+00:00	2015-10-14 04:00:52+00:00	Netrakona	Singhar Bangla	Panchananpur	NA	Negative	NA	Negative	NA	Negative	NA	Negative	27.99	Maybe	29.08	Negative	NA	Negative	NA	Negative	NA	Negative	NA	Negative	23.765	Positive	NA	Negative	15.475	Positive	NA	Negative	NA	Negative	NA	Negative	NA	Negative	NA	Negative	NA	Negative	NA	Negative	NA	NonDetect	30.59
396	N101304	2015-10-13 11:50:55+00:00	2015-10-15 04:05:19+00:00	Netrakona	Sonai	Ichhail	NA	Negative	NA	Negative	NA	Negative	NA	Negative	30.265	Negative	NA	Negative	26.24	Maybe	31.575	Negative	NA	Negative	NA	Negative	34.95	Negative	NA	Negative	12.115	Positive	NA	Negative	NA	Negative	27.265	Maybe	26.6	Maybe	NA	Negative	NA	Negative	NA	Negative	NA	NonDetect	33.88
397	N101305	2015-10-13 11:26:10+00:00	2015-10-15 04:01:33+00:00	Netrakona	Ward No-09	Dharia	21.015	Positive	NA	Negative	NA	Negative	NA	Negative	33.785	Negative	25.345	Positive	29.86	Negative	33.07	Negative	NA	Negative	NA	Negative	32.425	Negative	NA	Negative	12.825	Positive	NA	Negative	NA	Negative	NA	Negative	22.195	Positive	27.75	Maybe	21.575	Positive	NA	Negative	NA	NonDetect	31.15
398	N101401	2015-10-14 01:15:21+00:00	2015-10-15 04:07:49+00:00	Netrakona	Lakshmiganj	Atka Para	NA	Negative	NA	Negative	NA	Negative	NA	Negative	NA	Negative	NA	Negative	NA	Negative	NA	Negative	NA	Negative	NA	Negative	NA	Negative	NA	Negative	16.955	Positive	NA	Negative	24.285	Positive	NA	Negative	27.98	Maybe	NA	Negative	NA	Negative	NA	Negative	NA	NonDetect	34.725
399	N101402	2015-10-14 01:45:42+00:00	2015-10-15 04:02:58+00:00	Netrakona	Ward No-02	Satpai Town	27.91	Maybe	NA	Negative	33.98	Negative	NA	Negative	28.06	Negative	NA	Negative	NA	Negative	32.82	Negative	NA	Negative	NA	Negative	34	Negative	NA	Negative	12.245	Positive	NA	Negative	NA	Negative	NA	Negative	NA	Negative	NA	Negative	NA	Negative	NA	Negative	NA	NonDetect	34.15
400	N101403	2015-10-14 08:00:01+00:00	2015-10-16 01:30:12+00:00	Netrakona	Asma	Ujangaon	NA	Negative	NA	Negative	NA	Negative	NA	Negative	32.55	Negative	NA	Negative	28.3	Negative	NA	Negative	NA	Negative	NA	Negative	NA	Negative	NA	Negative	18.12	Positive	NA	Negative	NA	Negative	NA	Negative	NA	Negative	21.835	Positive	27.19	Maybe	31.92	Negative	NA	NonDetect	29.005
401	N101404	2015-10-14 11:14:02+00:00	2015-10-15 04:47:23+00:00	Netrakona	Challisha	Mymensingh Jhausi	NA	Negative	NA	Negative	NA	Negative	NA	Negative	NA	Negative	NA	Negative	27.615	Maybe	NA	Negative	NA	Negative	NA	Negative	NA	Negative	NA	Negative	16.95	Positive	NA	Negative	NA	Negative	26.975	Maybe	26.95	Maybe	NA	Negative	NA	Negative	NA	Negative	NA	NonDetect	NA
402	N101405	2015-10-14 13:00:33+00:00	2015-10-15 04:02:01+00:00	Netrakona	Sarmaisa	Ghagra	NA	Negative	NA	Negative	NA	Negative	NA	Negative	NA	Negative	NA	Negative	25.175	Positive	NA	Negative	NA	Negative	NA	Negative	NA	Negative	NA	Negative	20.18	Positive	NA	Negative	NA	Negative	NA	Negative	NA	Negative	NA	Negative	NA	Negative	25.15	Positive	NA	NonDetect	27.85
403	N101501	2015-10-15 04:42:26+00:00	2015-10-15 05:11:54+00:00	Netrakona	Maugati	Chuchua	33.86	Negative	NA	Negative	NA	Negative	NA	Negative	25.76	Positive	NA	Negative	NA	Negative	30.31	Negative	NA	Negative	22.395	Positive	29.62	Negative	NA	Negative	11.17	Positive	NA	Negative	27.82	Maybe	14.4	Positive	14.4	Positive	NA	Negative	NA	Negative	28.805	Negative	NA	NonDetect	30.33
404	N101502	2015-10-15 01:57:36+00:00	2015-10-16 01:00:23+00:00	Netrakona	Dakshin Bishiura	Chinarati	NA	Negative	NA	Negative	NA	Negative	NA	Negative	NA	Negative	NA	Negative	27.76	Maybe	NA	Negative	NA	Negative	NA	Negative	NA	Negative	NA	Negative	15.485	Positive	NA	Negative	NA	Negative	NA	Negative	NA	Negative	NA	Negative	NA	Negative	28.21	Negative	NA	NonDetect	32.25
405	N101503	2015-10-15 03:20:46+00:00	2015-10-16 01:00:43+00:00	Netrakona	Singhar Bangla	Fatehpur	NA	Negative	NA	Negative	NA	Negative	NA	Negative	34.09	Negative	NA	Negative	30.46	Negative	33.2	Negative	30.45	Negative	NA	Negative	23.16	Positive	NA	Negative	13.1	Positive	NA	Negative	NA	Negative	NA	Negative	33.615	Negative	NA	Negative	NA	Negative	NA	Negative	NA	NonDetect	25.555
406	N101505	2015-10-15 04:20:00+00:00	2015-10-17 01:00:53+00:00	Netrakona	Ward No-09	Hossain Pur	NA	Negative	NA	Negative	NA	Negative	NA	Negative	NA	Negative	NA	Negative	NA	Negative	31.96	Negative	NA	Negative	NA	Negative	29.96	Negative	NA	Negative	12.315	Positive	NA	Negative	NA	Negative	NA	Negative	NA	Negative	NA	Negative	NA	Negative	NA	Negative	NA	NonDetect	34.265
407	N101506	2015-10-15 06:15:18+00:00	2015-10-17 04:30:19+00:00	Netrakona	Kaliara Gabragat	Rajapur	NA	Negative	NA	Negative	NA	Negative	NA	Negative	24.57	Positive	26.68	Maybe	NA	Negative	33.8	Negative	NA	Negative	NA	Negative	30.16	Negative	NA	Negative	11.105	Positive	NA	Negative	NA	Negative	14.67	Positive	14.425	Positive	27.07	Maybe	NA	Negative	NA	Negative	NA	NonDetect	NA
408	N101507	2015-10-15 08:00:12+00:00	2015-10-16 01:00:12+00:00	Netrakona	Challisha	Chandrapati Khila	21.51	Positive	NA	Negative	NA	Negative	NA	Negative	33.54	Negative	NA	Negative	28.305	Negative	33.3	Negative	NA	Negative	NA	Negative	31.73	Negative	NA	Negative	13.21	Positive	NA	Negative	NA	Negative	NA	Negative	31.065	Negative	NA	Negative	NA	Negative	NA	Negative	NA	NonDetect	30.74
409	N101508	2015-10-15 09:20:14+00:00	2015-10-15 15:00:11+00:00	Netrakona	Singhar Bangla	Mymensingh Ruhi	NA	Negative	NA	Negative	NA	Negative	NA	Negative	34.39	Negative	NA	Negative	29.4	Negative	NA	Negative	NA	Negative	NA	Negative	NA	Negative	NA	Negative	20.305	Positive	NA	Negative	NA	Negative	28.48	Negative	27.5	Maybe	NA	Negative	NA	Negative	20.58	Positive	NA	NonDetect	27.54
410	N101702	2015-10-17 02:20:13+00:00	2015-10-18 04:21:07+00:00	Netrakona	Medni	Paschim Uluati	NA	Negative	NA	Negative	NA	Negative	NA	Negative	25.295	Positive	NA	Negative	NA	Negative	30.56	Negative	NA	Negative	NA	Negative	25.235	Positive	27.09	Maybe	12.82	Positive	NA	Negative	NA	Negative	16.4	Positive	16.24	Positive	NA	Negative	NA	Negative	34.04	Negative	NA	NonDetect	32.53
411	N101703	2015-10-17 02:25:33+00:00	2015-10-19 01:30:57+00:00	Netrakona	Kailati	Kutubpur	NA	Negative	NA	Negative	NA	Negative	NA	Negative	28.42	Negative	NA	Negative	NA	Negative	NA	Negative	NA	Negative	NA	Negative	NA	Negative	NA	Negative	15.91	Positive	NA	Negative	NA	Negative	18.46	Positive	17.82	Positive	NA	Negative	NA	Negative	NA	Negative	NA	NonDetect	NA
412	N101704	2015-10-17 07:30:59+00:00	2015-10-17 14:30:22+00:00	Netrakona	Ward No-05	Malni	NA	Negative	NA	Negative	NA	Negative	NA	Negative	NA	Negative	NA	Negative	NA	Negative	NA	Negative	NA	Negative	NA	Negative	NA	Negative	NA	Negative	18.135	Positive	NA	Negative	NA	Negative	NA	Negative	NA	Negative	NA	Negative	NA	Negative	NA	Negative	NA	NonDetect	NA
413	N101901	2015-10-19 01:50:59+00:00	2015-10-20 04:15:20+00:00	Netrakona	Medni	Medni	NA	NA	NA	NA	NA	NA	NA	NA	NA	NA	NA	NA	NA	NA	NA	NA	NA	NA	NA	NA	NA	NA	NA	NA	NA	NA	NA	NA	NA	NA	NA	NA	NA	NA	NA	NA	NA	NA	NA	NA	NA	NA	NA
414	N101902	2015-10-19 03:40:29+00:00	2015-10-20 05:25:05+00:00	Netrakona	Kaliara Gabragat	Rajapur	NA	Negative	NA	Negative	25.05	Positive	NA	Negative	24.585	Positive	25.13	Positive	NA	Negative	34.55	Negative	NA	Negative	NA	Negative	NA	Negative	NA	Negative	12.055	Positive	NA	Negative	NA	Negative	27.825	Maybe	NA	Negative	15.68	Positive	NA	Negative	32.87	Negative	NA	NonDetect	29.03
415	N101903	2015-10-19 04:00:39+00:00	2015-10-19 00:00:37+00:00	Netrakona	Ward No-07	Katly	NA	Negative	NA	Negative	NA	Negative	27.74	Maybe	31.055	Negative	NA	Negative	NA	Negative	NA	Negative	NA	Negative	NA	Negative	34.34	Negative	NA	Negative	13.295	Positive	NA	Negative	NA	Negative	NA	Negative	NA	Negative	27.91	Maybe	NA	Negative	NA	Negative	NA	NonDetect	33.16
416	N101904	2015-10-19 05:08:38+00:00	2015-10-20 05:00:09+00:00	Netrakona	Kailati	Anantapur	NA	Negative	NA	Negative	NA	Negative	NA	Negative	34.64	Negative	NA	Negative	NA	Negative	NA	Negative	NA	Negative	NA	Negative	31.38	Negative	NA	Negative	14.32	Positive	NA	Negative	NA	Negative	NA	Negative	30.29	Negative	NA	Negative	20.05	Positive	NA	Negative	NA	NonDetect	31.415
417	N101905	2015-10-19 06:20:31+00:00	2015-10-20 05:28:05+00:00	Netrakona	Ward No-04	Bahircha Para	NA	Negative	NA	Negative	NA	Negative	NA	Negative	28.58	Negative	NA	Negative	33.34	Negative	28.96	Negative	NA	Negative	NA	Negative	27.465	Maybe	NA	Negative	NA	Negative	NA	Negative	NA	Negative	28.81	Negative	NA	Negative	NA	Negative	NA	Negative	34.7	Negative	34.6	Negative	27.57
418	N101906	2015-10-19 06:46:20+00:00	2015-10-20 04:13:50+00:00	Netrakona	Maugati	Naopara	NA	Negative	NA	Negative	NA	Negative	NA	Negative	32.98	Negative	NA	Negative	19.21	Positive	NA	Negative	NA	Negative	NA	Negative	34.35	Negative	NA	Negative	16.02	Positive	NA	Negative	NA	Negative	NA	Negative	22.365	Positive	NA	Negative	NA	Negative	21.17	Positive	NA	NonDetect	28.31
419	N101907	2015-10-19 07:20:02+00:00	2015-10-20 04:50:51+00:00	Netrakona	Ward No-09	Kurpar	27.255	Maybe	NA	Negative	NA	Negative	NA	Negative	30.16	Negative	27.95	Maybe	25.87	Positive	31.73	Negative	NA	Negative	NA	Negative	NA	Negative	NA	Negative	12.285	Positive	NA	Negative	NA	Negative	NA	Negative	33.73	Negative	27.14	Maybe	NA	Negative	24.06	Positive	NA	NonDetect	31.235
420	N102001	2015-10-20 07:00:45+00:00	2015-10-21 06:41:57+00:00	Netrakona	Lakshmiganj	Bhajni Para	NA	NA	NA	NA	NA	NA	NA	NA	NA	NA	NA	NA	NA	NA	NA	NA	NA	NA	NA	NA	NA	NA	NA	NA	NA	NA	NA	NA	NA	NA	NA	NA	NA	NA	NA	NA	NA	NA	NA	NA	NA	NA	NA
421	N102002	2015-10-20 08:26:30+00:00	2015-10-21 05:00:26+00:00	Netrakona	Kaliara Gabragat	Rajapur	NA	Negative	NA	Negative	NA	Negative	NA	Negative	27.925	Maybe	NA	Negative	NA	Negative	NA	Negative	NA	Negative	NA	Negative	33.8	Negative	NA	Negative	13.185	Positive	NA	Negative	NA	Negative	NA	Negative	20.735	Positive	NA	Negative	NA	Negative	16.825	Positive	NA	NonDetect	32.51
422	N102003	2015-10-20 10:00:43+00:00	2015-10-21 04:50:52+00:00	Netrakona	Amtala	Shibprasadpur	NA	Negative	NA	Negative	NA	Negative	NA	Negative	32.445	Negative	25.4	Positive	NA	Negative	NA	Negative	NA	Negative	NA	Negative	33.6	Negative	NA	Negative	12.39	Positive	NA	Negative	30	Negative	NA	Negative	NA	Negative	27.55	Maybe	NA	Negative	19.295	Positive	NA	NonDetect	27.56
423	N102004	2015-10-20 11:04:40+00:00	2015-10-21 04:24:12+00:00	Netrakona	Ward No-08	Nagra Uttar	NA	Negative	NA	Negative	NA	Negative	NA	Negative	29.96	Negative	27.775	Maybe	NA	Negative	34.215	Negative	NA	Negative	NA	Negative	30.395	Negative	NA	Negative	12.225	Positive	NA	Negative	NA	Negative	NA	Negative	16.885	Positive	NA	Negative	NA	Negative	25.15	Positive	NA	NonDetect	30.05
424	N102005	2015-10-20 01:29:03+00:00	2015-10-22 04:00:46+00:00	Netrakona	Pogla	Chandankandi	NA	Negative	NA	Negative	NA	Negative	NA	Negative	NA	Negative	NA	Negative	NA	Negative	NA	Negative	26.79	Maybe	NA	Negative	NA	Negative	NA	Negative	22.85	Positive	NA	Negative	NA	Negative	NA	Negative	27.46	Maybe	NA	Negative	NA	Negative	23.435	Positive	NA	NonDetect	32.99
425	N102006	2015-10-20 16:00:46+00:00	2015-10-22 00:00:01+00:00	Netrakona	Madanpur	Nandipur	NA	Negative	NA	Negative	NA	Negative	NA	Negative	NA	Negative	NA	Negative	NA	Negative	NA	Negative	NA	Negative	NA	Negative	NA	Negative	NA	Negative	24.14	Positive	NA	Negative	NA	Negative	NA	Negative	NA	Negative	NA	Negative	NA	Negative	NA	Negative	NA	NonDetect	28.875
426	N102101	2015-10-20 06:50:38+00:00	2015-10-21 04:06:43+00:00	Netrakona	Ward No-02	Satpai Town	NA	Negative	NA	Negative	NA	Negative	NA	Negative	NA	Negative	NA	Negative	NA	Negative	NA	Negative	NA	Negative	NA	Negative	NA	Negative	NA	Negative	21.3	Positive	NA	Negative	NA	Negative	NA	Negative	NA	Negative	NA	Negative	NA	Negative	NA	Negative	27.375	Maybe	33.65
427	N102102	2015-10-19 20:10:14+00:00	2015-10-21 05:00:18+00:00	Netrakona	Teligati	Teliganti	NA	Negative	NA	Negative	NA	Negative	NA	Negative	NA	Negative	31.46	Negative	NA	Negative	NA	Negative	NA	Negative	NA	Negative	NA	Negative	NA	Negative	20.38	Positive	NA	Negative	NA	Negative	NA	Negative	26.085	Maybe	NA	Negative	NA	Negative	NA	Negative	NA	NonDetect	33.24
428	N102103	2015-10-21 06:10:14+00:00	2015-10-21 13:50:31+00:00	Netrakona	Medni	Nischintapur	NA	Negative	NA	Negative	NA	Negative	NA	Negative	31.855	Negative	NA	Negative	NA	Negative	30.26	Negative	NA	Negative	NA	Negative	27.95	Maybe	NA	Negative	7.6	Positive	NA	Negative	NA	Negative	NA	Negative	NA	Negative	NA	Negative	NA	Negative	NA	Negative	NA	NonDetect	30.875
429	N102104	2015-10-21 02:30:59+00:00	2015-10-21 06:00:30+00:00	Netrakona	Sarmaisa	Rupchanpur	19.765	Positive	NA	Negative	NA	Negative	NA	Negative	NA	Negative	NA	Negative	NA	Negative	34.45	Negative	NA	Negative	NA	Negative	NA	Negative	NA	Negative	15.94	Positive	NA	Negative	28.77	Negative	NA	Negative	NA	Negative	NA	Negative	NA	Negative	NA	Negative	28.18	Negative	NA
430	N102501	2015-10-24 23:40:42+00:00	2015-10-25 10:10:56+00:00	Netrakona	Challisha	Bamnikona	NA	Negative	NA	Negative	NA	Negative	NA	Negative	NA	Negative	NA	Negative	NA	Negative	NA	Negative	NA	Negative	NA	Negative	NA	Negative	NA	Negative	23.165	Positive	NA	Negative	NA	Negative	NA	Negative	NA	Negative	NA	Negative	NA	Negative	27.175	Maybe	NA	NonDetect	31.17
431	N102502	2015-10-24 23:50:57+00:00	2015-10-26 07:20:03+00:00	Netrakona	Baushi	Deopur	NA	Negative	25.875	Positive	NA	Negative	NA	Negative	NA	Negative	NA	Negative	23.5	Positive	27.85	Maybe	NA	Negative	NA	Negative	NA	Negative	NA	Negative	8.27	Positive	NA	Negative	NA	Negative	29.04	Negative	29.985	Negative	22.01	Positive	NA	Negative	30.135	Negative	NA	NonDetect	29.655
432	N102503	2015-10-25 02:35:21+00:00	2015-10-26 07:08:30+00:00	Netrakona	Ward No-03	Pukuria	25.425	Positive	NA	Negative	NA	Negative	NA	Negative	28.695	Negative	NA	Negative	NA	Negative	NA	Negative	NA	Negative	NA	Negative	33.04	Negative	NA	Negative	15.21	Positive	NA	Negative	NA	Negative	NA	Negative	NA	Negative	27.73	Maybe	NA	Negative	NA	Negative	NA	NonDetect	NA
433	N102504	2015-10-22 22:00:48+00:00	2015-10-27 06:18:26+00:00	Netrakona	Dhala Mulgaon	Noasi	24.755	Positive	NA	Negative	NA	Negative	NA	Negative	NA	Negative	NA	Negative	29.08	Negative	NA	Negative	NA	Negative	NA	Negative	NA	Negative	NA	Negative	12.93	Positive	NA	Negative	NA	Negative	NA	Negative	NA	Negative	24.015	Positive	NA	Negative	NA	Negative	NA	NonDetect	30.395
434	N102505	2015-10-25 04:05:34+00:00	2015-10-25 10:10:57+00:00	Netrakona	Ward No-03	Pukuria	NA	Negative	NA	Negative	NA	Negative	NA	Negative	33.23	Negative	NA	Negative	26.88	Maybe	31.895	Negative	NA	Negative	NA	Negative	34.87	Negative	NA	Negative	12.585	Positive	NA	Negative	NA	Negative	NA	Negative	NA	Negative	27.7	Maybe	NA	Negative	NA	Negative	NA	NonDetect	29.26
435	N102506	2015-10-25 11:00:45+00:00	2015-10-26 07:30:39+00:00	Netrakona	Ward No-03	Pukuria	NA	Negative	NA	Negative	NA	Negative	NA	Negative	34.35	Negative	NA	Negative	26.98	Maybe	34.59	Negative	NA	Negative	NA	Negative	NA	Negative	NA	Negative	13.32	Positive	NA	Negative	NA	Negative	NA	Negative	22.12	Positive	NA	Negative	NA	Negative	29.5	Negative	NA	NonDetect	34.03
436	N102507	2015-10-25 11:14:49+00:00	2015-10-26 07:00:15+00:00	Netrakona	Ward No-07	Joynagar	NA	Negative	NA	Negative	NA	Negative	NA	Negative	NA	Negative	NA	Negative	23.93	Positive	NA	Negative	NA	Negative	NA	Negative	NA	Negative	NA	Negative	21.99	Positive	NA	Negative	NA	Negative	NA	Negative	NA	Negative	26.08	Maybe	NA	Negative	NA	Negative	NA	NonDetect	NA
437	N102508	2015-10-25 15:00:55+00:00	2015-10-27 06:10:00+00:00	Netrakona	Challisha	Nurpur	NA	Negative	NA	Negative	NA	Negative	NA	Negative	NA	Negative	NA	Negative	NA	Negative	NA	Negative	NA	Negative	NA	Negative	NA	Negative	NA	Negative	19.79	Positive	NA	Negative	NA	Negative	NA	Negative	NA	Negative	NA	Negative	NA	Negative	NA	Negative	NA	NonDetect	NA
438	N102509	2015-10-25 15:00:50+00:00	2015-10-27 06:08:02+00:00	Netrakona	Bairati	Khamarhati	NA	Negative	NA	Negative	NA	Negative	NA	Negative	33.265	Negative	NA	Negative	28.33	Negative	NA	Negative	NA	Negative	NA	Negative	NA	Negative	NA	Negative	14.78	Positive	NA	Negative	NA	Negative	NA	Negative	NA	Negative	NA	Negative	NA	Negative	NA	Negative	NA	NonDetect	31.525
439	N102602	2015-10-26 02:41:20+00:00	2015-10-27 06:09:32+00:00	Netrakona	Dalpa	Budh Pasha	NA	Negative	NA	Negative	NA	Negative	NA	Negative	NA	Negative	NA	Negative	29.29	Negative	NA	Negative	NA	Negative	NA	Negative	NA	Negative	NA	Negative	21.26	Positive	NA	Negative	NA	Negative	NA	Negative	NA	Negative	NA	Negative	NA	Negative	34.67	Negative	NA	NonDetect	32.34
440	N102604	2015-10-26 06:30:39+00:00	2015-10-28 04:55:28+00:00	Netrakona	Sahata	Darun Sahata	NA	Negative	NA	Negative	NA	Negative	NA	Negative	NA	Negative	NA	Negative	NA	Negative	NA	Negative	NA	Negative	NA	Negative	32.125	Negative	NA	Negative	12.105	Positive	NA	Negative	NA	Negative	NA	Negative	NA	Negative	NA	Negative	NA	Negative	NA	Negative	28.46	Negative	NA
441	N102605	2015-10-26 07:00:14+00:00	2015-10-27 06:30:27+00:00	Netrakona	Ward No-03	Pukuria	NA	Negative	NA	Negative	NA	Negative	34.45	Negative	28.995	Negative	NA	Negative	29.12	Negative	NA	Negative	NA	Negative	NA	Negative	33.33	Negative	NA	Negative	10.965	Positive	NA	Negative	NA	Negative	NA	Negative	NA	Negative	27.475	Maybe	NA	Negative	NA	Negative	NA	NonDetect	NA
442	N102606	2015-10-26 09:00:54+00:00	2015-10-27 06:11:25+00:00	Netrakona	Madanpur	Khabulia	NA	NA	NA	NA	NA	NA	NA	NA	NA	NA	NA	NA	NA	NA	NA	NA	NA	NA	NA	NA	NA	NA	NA	NA	NA	NA	NA	NA	NA	NA	NA	NA	NA	NA	NA	NA	NA	NA	NA	NA	NA	NA	NA
443	N102607	2015-10-26 00:00:48+00:00	2015-10-28 01:00:01+00:00	Netrakona	Sahata	Kumar Para	NA	Negative	NA	Negative	NA	Negative	NA	Negative	26.45	Maybe	NA	Negative	27.46	Maybe	NA	Negative	NA	Negative	NA	Negative	33.63	Negative	NA	Negative	16.23	Positive	NA	Negative	NA	Negative	NA	Negative	NA	Negative	NA	Negative	NA	Negative	NA	Negative	NA	NonDetect	NA
444	N102608	2015-10-26 00:25:24+00:00	2015-10-27 06:40:23+00:00	Netrakona	Rauha	Bara Gara	NA	Negative	NA	Negative	NA	Negative	NA	Negative	NA	Negative	NA	Negative	28.51	Negative	NA	Negative	NA	Negative	NA	Negative	NA	Negative	NA	Negative	17.955	Positive	NA	Negative	NA	Negative	NA	Negative	NA	Negative	NA	Negative	NA	Negative	NA	Negative	21.2	Positive	33.28
445	N102701	2015-10-26 18:25:35+00:00	2015-10-28 16:34:35+00:00	Netrakona	Ward No-04	Bahircha Para	NA	Negative	NA	Negative	NA	Negative	NA	Negative	33.9	Negative	NA	Negative	25.84	Positive	27.56	Maybe	NA	Negative	NA	Negative	NA	Negative	NA	Negative	14.52	Positive	NA	Negative	27.96	Maybe	NA	Negative	NA	Negative	NA	Negative	NA	Negative	NA	Negative	NA	NonDetect	33.57
446	N102702	2015-10-27 00:54:01+00:00	2015-10-28 04:00:51+00:00	Netrakona	Ward No-07	Joynagar	33.52	Negative	NA	Negative	NA	Negative	NA	Negative	NA	Negative	NA	Negative	27.53	Maybe	NA	Negative	NA	Negative	NA	Negative	32.61	Negative	NA	Negative	12.27	Positive	NA	Negative	NA	Negative	NA	Negative	NA	Negative	NA	Negative	NA	Negative	NA	Negative	NA	NonDetect	32.08
447	N102703	2015-10-26 09:00:14+00:00	2015-10-28 01:30:31+00:00	Netrakona	Ward No-02	Dakhin Satpai Nadir Par(Palpar	NA	Negative	NA	Negative	NA	Negative	NA	Negative	33.83	Negative	NA	Negative	26.43	Maybe	28.34	Negative	NA	Negative	NA	Negative	28.73	Negative	NA	Negative	13.355	Positive	NA	Negative	NA	Negative	NA	Negative	NA	Negative	NA	Negative	NA	Negative	NA	Negative	24.04	Positive	34.32
448	N102704	2015-10-27 01:30:00+00:00	2015-10-28 04:40:47+00:00	Netrakona	Ward No-07	Mukter Para	NA	Negative	NA	Negative	NA	Negative	NA	Negative	25.125	Positive	NA	Negative	27.58	Maybe	NA	Negative	NA	Negative	NA	Negative	NA	Negative	NA	Negative	13.805	Positive	NA	Negative	NA	Negative	16.305	Positive	16.075	Positive	26.65	Maybe	NA	Negative	NA	Negative	NA	NonDetect	34.93
449	N102705	2015-10-27 02:35:44+00:00	2015-10-28 07:20:27+00:00	Netrakona	Medni	Medni	NA	Negative	NA	Negative	NA	Negative	NA	Negative	27.855	Maybe	NA	Negative	27.67	Maybe	NA	Negative	NA	Negative	NA	Negative	30.82	Negative	NA	Negative	13.385	Positive	NA	Negative	27.9	Maybe	NA	Negative	NA	Negative	23.445	Positive	NA	Negative	NA	Negative	NA	NonDetect	31.65
450	N102706	2015-10-27 02:50:37+00:00	2015-10-28 04:34:03+00:00	Netrakona	Maugati	Chuchua	NA	Negative	NA	Negative	NA	Negative	NA	Negative	34.72	Negative	NA	Negative	NA	Negative	NA	Negative	NA	Negative	NA	Negative	NA	Negative	NA	Negative	22.2	Positive	NA	Negative	NA	Negative	NA	Negative	NA	Negative	NA	Negative	NA	Negative	22.13	Positive	NA	NonDetect	27.88
451	N102707	2015-10-26 23:21:22+00:00	2015-10-29 04:50:52+00:00	Netrakona	Lakshmiganj	Atka Para	27.87	Maybe	NA	Negative	NA	Negative	NA	Negative	NA	Negative	NA	Negative	29.2	Negative	NA	Negative	NA	Negative	NA	Negative	NA	Negative	NA	Negative	15.22	Positive	NA	Negative	NA	Negative	NA	Negative	NA	Negative	NA	Negative	NA	Negative	NA	Negative	NA	NonDetect	NA
452	N102801	2015-10-27 13:15:33+00:00	2015-10-29 04:25:36+00:00	Netrakona	Ward No-02	Satpai Town	NA	Negative	NA	Negative	NA	Negative	NA	Negative	NA	Negative	NA	Negative	23.43	Positive	NA	Negative	NA	Negative	NA	Negative	NA	Negative	NA	Negative	24.545	Positive	NA	Negative	NA	Negative	NA	Negative	NA	Negative	NA	Negative	NA	Negative	NA	Negative	30.22	Negative	NA
453	N102802	2015-10-27 19:30:11+00:00	2015-10-29 04:34:02+00:00	Netrakona	Kailati	Madhabpur	NA	Negative	NA	Negative	NA	Negative	NA	Negative	25.09	Positive	NA	Negative	28.985	Negative	NA	Negative	NA	Negative	NA	Negative	34.59	Negative	NA	Negative	10.185	Positive	NA	Negative	28.3	Negative	NA	Negative	NA	Negative	NA	Negative	NA	Negative	NA	Negative	NA	NonDetect	NA
454	N102803	2015-10-28 05:10:24+00:00	2015-10-29 01:00:49+00:00	Netrakona	Amtala	Amtala	NA	Negative	NA	Negative	NA	Negative	NA	Negative	NA	Negative	NA	Negative	NA	Negative	31.455	Negative	NA	Negative	NA	Negative	28.74	Negative	NA	Negative	9.225	Positive	NA	Negative	NA	Negative	NA	Negative	28.735	Negative	NA	Negative	NA	Negative	NA	Negative	NA	NonDetect	32.575
455	N102804	2015-10-28 07:05:40+00:00	2015-10-29 01:00:03+00:00	Netrakona	Medni	Dhorer Bangla	NA	Negative	NA	Negative	NA	Negative	NA	Negative	30.14	Negative	NA	Negative	NA	Negative	28.23	Negative	NA	Negative	NA	Negative	NA	Negative	NA	Negative	9.34	Positive	NA	Negative	NA	Negative	NA	Negative	33.86	Negative	28.67	Negative	NA	Negative	33.53	Negative	NA	NonDetect	28.37
456	N102805	2015-10-28 10:50:30+00:00	2015-10-29 04:32:41+00:00	Netrakona	Lakshmiganj	Baishdhar	NA	Negative	NA	Negative	NA	Negative	NA	Negative	34.28	Negative	NA	Negative	26.59	Maybe	NA	Negative	NA	Negative	NA	Negative	NA	Negative	NA	Negative	19.06	Positive	NA	Negative	24.73	Positive	NA	Negative	NA	Negative	26.57	Maybe	NA	Negative	NA	Negative	NA	NonDetect	31.16
457	N102901	2015-10-29 01:05:36+00:00	2015-10-30 06:00:12+00:00	Netrakona	Sarmaisa	Basati	NA	Negative	NA	Negative	NA	Negative	NA	Negative	NA	Negative	NA	Negative	27.84	Maybe	NA	Negative	NA	Negative	NA	Negative	NA	Negative	NA	Negative	14.025	Positive	NA	Negative	NA	Negative	NA	Negative	NA	Negative	NA	Negative	NA	Negative	NA	Negative	17.895	Positive	32.95
458	N103101	2015-10-30 19:00:27+00:00	2015-11-01 04:44:15+00:00	Netrakona	Ward No-02	Dakhin Satpai Nadir Par(Palpar	NA	Negative	NA	Negative	NA	Negative	34.85	Negative	31.985	Negative	NA	Negative	NA	Negative	NA	Negative	NA	Negative	NA	Negative	21.195	Positive	NA	Negative	14.435	Positive	34.57	Negative	23.045	Positive	NA	Negative	NA	Negative	NA	Negative	NA	Negative	NA	Negative	22.23	Positive	27.47
459	N103102	2015-10-31 02:35:41+00:00	2015-11-02 04:10:29+00:00	Netrakona	NA	NA	NA	Negative	NA	Negative	26.91	Maybe	NA	Negative	NA	Negative	NA	Negative	28.42	Negative	31.46	Negative	NA	Negative	NA	Negative	NA	Negative	NA	Negative	11.845	Positive	NA	Negative	NA	Negative	NA	Negative	15.07	Positive	NA	Negative	NA	Negative	NA	Negative	NA	NonDetect	30.34
460	N103103	2015-10-31 03:45:47+00:00	2015-11-01 05:00:44+00:00	Netrakona	Ward No-09	Parla	NA	Negative	NA	Negative	NA	Negative	NA	Negative	23.44	Positive	NA	Negative	28.19	Negative	NA	Negative	NA	Negative	NA	Negative	31.875	Negative	NA	Negative	12.06	Positive	NA	Negative	NA	Negative	NA	Negative	NA	Negative	NA	Negative	NA	Negative	NA	Negative	NA	NonDetect	33.45
461	N103104	2015-10-31 05:42:59+00:00	2015-11-01 05:00:09+00:00	Netrakona	Challisha	Mymensingh Jhausi	NA	Negative	NA	Negative	NA	Negative	NA	Negative	20.805	Positive	25.59	Positive	NA	Negative	29.46	Negative	29.92	Negative	NA	Negative	26.56	Maybe	NA	Negative	9.31	Positive	33.26	Negative	NA	Negative	NA	Negative	34.02	Negative	20.86	Positive	NA	Negative	NA	Negative	NA	NonDetect	33.525
462	N103105	2015-10-31 15:00:51+00:00	2015-11-01 05:00:06+00:00	Netrakona	Challisha	Bamnikona	NA	Negative	NA	Negative	NA	Negative	NA	Negative	25.485	Positive	NA	Negative	NA	Negative	NA	Negative	NA	Negative	NA	Negative	33.95	Negative	NA	Negative	12.9	Positive	NA	Negative	NA	Negative	NA	Negative	NA	Negative	NA	Negative	NA	Negative	NA	Negative	NA	NonDetect	NA
463	N103106	2015-10-31 16:30:16+00:00	2015-11-01 05:00:07+00:00	Netrakona	Medni	Khar Bangla	NA	Negative	NA	Negative	NA	Negative	NA	Negative	27.37	Maybe	NA	Negative	30.01	Negative	NA	Negative	NA	Negative	NA	Negative	26.4	Maybe	NA	Negative	NA	Negative	34.93	Negative	NA	Negative	NA	Negative	NA	Negative	NA	Negative	NA	Negative	33.32	Negative	NA	NonDetect	29.59
464	N103107	2015-10-31 16:20:32+00:00	2015-11-02 04:16:40+00:00	Netrakona	Teligati	Teliganti	28.22	Negative	NA	Negative	NA	Negative	NA	Negative	NA	Negative	NA	Negative	29.97	Negative	NA	Negative	NA	Negative	NA	Negative	34.26	Negative	NA	Negative	17.655	Positive	NA	Negative	27.43	Maybe	NA	Negative	22.785	Positive	NA	Negative	NA	Negative	NA	Negative	NA	NonDetect	NA
465	N110101	2015-10-31 18:15:25+00:00	2015-11-01 04:50:12+00:00	Netrakona	Rauha	Balijuri	NA	Negative	NA	Negative	NA	Negative	NA	Negative	NA	Negative	NA	Negative	27.27	Maybe	31.08	Negative	NA	Negative	NA	Negative	28.98	Negative	NA	Negative	9.84	Positive	34.45	Negative	NA	Negative	NA	Negative	13.165	Positive	NA	Negative	NA	Negative	34.49	Negative	NA	NonDetect	29.625
466	N110102	2015-11-01 01:15:35+00:00	2015-11-02 00:00:24+00:00	Netrakona	Sahata	Hiluchia	NA	Negative	NA	Negative	NA	Negative	NA	Negative	29.93	Negative	NA	Negative	NA	Negative	NA	Negative	NA	Negative	NA	Negative	NA	Negative	NA	Negative	19.28	Positive	NA	Negative	NA	Negative	NA	Negative	NA	Negative	NA	Negative	NA	Negative	19.335	Positive	NA	NonDetect	27.05
467	N110103	2015-11-01 05:35:16+00:00	2015-11-02 04:12:45+00:00	Netrakona	Ward No-02	Satpai Town	NA	Negative	NA	Negative	NA	Negative	NA	Negative	23.625	Positive	NA	Negative	NA	Negative	29.9	Negative	NA	Negative	NA	Negative	26.71	Maybe	22.735	Positive	12.36	Positive	NA	Negative	29.68	Negative	24.685	Positive	23.945	Positive	16.75	Positive	NA	Negative	28.36	Negative	17.09	Positive	27.71
468	N110104	2015-10-31 19:15:31+00:00	2015-11-02 04:15:04+00:00	Netrakona	Kailati	Maujebali	NA	Negative	NA	Negative	NA	Negative	NA	Negative	NA	Negative	NA	Negative	NA	Negative	32.68	Negative	NA	Negative	NA	Negative	NA	Negative	NA	Negative	10.355	Positive	34.67	Negative	NA	Negative	NA	Negative	34.97	Negative	NA	Negative	NA	Negative	20.22	Positive	32.85	Negative	NA
469	N110201	2015-11-02 06:00:30+00:00	2015-11-03 04:15:17+00:00	Netrakona	Dakshin Bishiura	Sreepur Bali	NA	NA	NA	NA	NA	NA	NA	NA	NA	NA	NA	NA	NA	NA	NA	NA	NA	NA	NA	NA	NA	NA	NA	NA	NA	NA	NA	NA	NA	NA	NA	NA	NA	NA	NA	NA	NA	NA	NA	NA	NA	NA	NA
470	N110202	2015-11-02 06:40:08+00:00	2015-11-02 11:00:07+00:00	Netrakona	Maugati	Kanchanpur	NA	Negative	NA	Negative	NA	Negative	NA	Negative	25.815	Positive	23.645	Positive	NA	Negative	NA	Negative	NA	Negative	NA	Negative	NA	Negative	NA	Negative	9.205	Positive	NA	Negative	NA	Negative	NA	Negative	33.41	Negative	18.865	Positive	NA	Negative	33.4	Negative	NA	NonDetect	27.56
471	N110203	2015-11-02 15:24:46+00:00	2015-11-03 04:30:59+00:00	Netrakona	Kailati	Bil Tarakuri	NA	Negative	NA	Negative	NA	Negative	NA	Negative	NA	Negative	NA	Negative	26.97	Maybe	NA	Negative	NA	Negative	NA	Negative	32.07	Negative	NA	Negative	19.61	Positive	NA	Negative	27.65	Maybe	NA	Negative	27.23	Maybe	NA	Negative	NA	Negative	NA	Negative	NA	NonDetect	32.42
472	N110204	2015-11-02 05:18:23+00:00	2015-11-03 12:00:24+00:00	Netrakona	Ward No-02	Dakhin Satpai Nadir Par(Palpar	NA	Negative	NA	Negative	NA	Negative	NA	Negative	29.78	Negative	NA	Negative	27.92	Maybe	26.67	Maybe	NA	Negative	NA	Negative	27.865	Maybe	NA	Negative	9.66	Positive	34.13	Negative	NA	Negative	26.86	Maybe	34.04	Negative	24.31	Positive	NA	Negative	28.73	Negative	18.185	Positive	28.7
473	N110301	2015-11-02 23:15:08+00:00	2015-11-03 04:31:55+00:00	Netrakona	Rauha	Bara Gara	NA	Negative	NA	Negative	NA	Negative	NA	Negative	24.725	Positive	NA	Negative	27.77	Maybe	NA	Negative	NA	Negative	NA	Negative	32.53	Negative	23.945	Positive	13.605	Positive	NA	Negative	NA	Negative	16.175	Positive	15.745	Positive	NA	Negative	NA	Negative	NA	Negative	NA	NonDetect	32.7
474	N110302	2015-11-03 03:17:48+00:00	2015-11-04 19:40:13+00:00	Netrakona	Ward No-09	Parla	NA	Negative	NA	Negative	NA	Negative	NA	Negative	34.23	Negative	NA	Negative	27.84	Maybe	33.79	Negative	NA	Negative	NA	Negative	33.29	Negative	NA	Negative	14.43	Positive	NA	Negative	NA	Negative	NA	Negative	NA	Negative	NA	Negative	NA	Negative	NA	Negative	NA	NonDetect	NA
475	N110303	2015-11-03 05:00:21+00:00	2015-11-04 19:35:09+00:00	Netrakona	Maugati	Mara Dighi	NA	Negative	NA	Negative	NA	Negative	NA	Negative	NA	Negative	NA	Negative	29.16	Negative	NA	Negative	NA	Negative	NA	Negative	30.275	Negative	28.5	Negative	11.325	Positive	NA	Negative	NA	Negative	14.45	Positive	14.6	Positive	21.65	Positive	NA	Negative	27.01	Maybe	NA	NonDetect	27.545
476	N110304	2015-11-03 21:40:56+00:00	2015-11-04 19:33:17+00:00	Netrakona	Maugati	Chuchua	NA	Negative	NA	Negative	NA	Negative	NA	Negative	32.84	Negative	NA	Negative	NA	Negative	NA	Negative	NA	Negative	NA	Negative	NA	Negative	NA	Negative	21.09	Positive	NA	Negative	NA	Negative	NA	Negative	NA	Negative	NA	Negative	NA	Negative	21.13	Positive	NA	NonDetect	28.085
477	N110305	2015-11-04 00:37:39+00:00	2015-11-05 02:30:36+00:00	Netrakona	Amtala	Amtala	NA	Negative	NA	Negative	NA	Negative	NA	Negative	23.945	Positive	21.145	Positive	27.85	Maybe	NA	Negative	NA	Negative	NA	Negative	31.68	Negative	NA	Negative	11.745	Positive	NA	Negative	NA	Negative	NA	Negative	NA	Negative	NA	Negative	NA	Negative	NA	Negative	NA	NonDetect	34.57
478	N110306	2015-11-03 10:00:36+00:00	2015-11-04 19:35:41+00:00	Netrakona	Garadoba	Hauskhana	NA	Negative	NA	Negative	NA	Negative	NA	Negative	29.585	Negative	NA	Negative	29.44	Negative	NA	Negative	NA	Negative	NA	Negative	NA	Negative	NA	Negative	16.81	Positive	NA	Negative	NA	Negative	NA	Negative	NA	Negative	NA	Negative	NA	Negative	33.555	Negative	NA	NonDetect	27.39
479	N110401	2015-11-03 21:45:15+00:00	2015-11-04 19:42:25+00:00	Netrakona	Rauha	Kamalpur(Part)	NA	Negative	NA	Negative	NA	Negative	NA	Negative	NA	Negative	NA	Negative	29.11	Negative	NA	Negative	NA	Negative	NA	Negative	33.83	Negative	25.91	Positive	15.2	Positive	NA	Negative	NA	Negative	NA	Negative	NA	Negative	NA	Negative	NA	Negative	NA	Negative	NA	NonDetect	29.77
480	N110402	2015-11-03 20:45:30+00:00	2015-11-05 05:33:33+00:00	Netrakona	Ward No-07	Katly	NA	Negative	NA	Negative	NA	Negative	NA	Negative	28.265	Negative	NA	Negative	26.03	Maybe	NA	Negative	NA	Negative	NA	Negative	26.48	Maybe	NA	Negative	15.325	Positive	NA	Negative	29.015	Negative	18.18	Positive	17.985	Positive	NA	Negative	NA	Negative	NA	Negative	NA	NonDetect	33.71
481	N110403	2015-11-04 20:15:47+00:00	2015-11-07 04:20:23+00:00	Netrakona	Maugati	Kanchanpur	NA	Negative	NA	Negative	NA	Negative	NA	Negative	28.21	Negative	NA	Negative	26.12	Maybe	NA	Negative	NA	Negative	NA	Negative	34.67	Negative	NA	Negative	17.615	Positive	NA	Negative	NA	Negative	NA	Negative	NA	Negative	NA	Negative	NA	Negative	NA	Negative	NA	NonDetect	NA
482	N110404	2015-11-05 07:20:56+00:00	2015-11-07 04:35:06+00:00	Netrakona	Teligati	Gandharbapur	NA	Negative	NA	Negative	NA	Negative	NA	Negative	28.24	Negative	NA	Negative	29.75	Negative	NA	Negative	33.47	Negative	NA	Negative	NA	Negative	NA	Negative	14.705	Positive	NA	Negative	NA	Negative	NA	Negative	NA	Negative	17.15	Positive	NA	Negative	NA	Negative	NA	NonDetect	30.58
483	N110501	2015-11-05 13:11:34+00:00	2015-11-06 16:55:40+00:00	Netrakona	Medni	Digjan	NA	Negative	NA	Negative	NA	Negative	NA	Negative	26.26	Maybe	25.81	Positive	30.17	Negative	NA	Negative	NA	Negative	NA	Negative	33.525	Negative	NA	Negative	14.335	Positive	NA	Negative	29.56	Negative	16.505	Positive	16.165	Positive	NA	Negative	NA	Negative	34.68	Negative	NA	NonDetect	28.085
484	N110502	2015-11-05 04:30:14+00:00	2015-11-07 19:30:13+00:00	Netrakona	Kaliara Gabragat	Gabragati	NA	Negative	NA	Negative	NA	Negative	NA	Negative	24.27	Positive	23.395	Positive	28.79	Negative	26.03	Maybe	NA	Negative	NA	Negative	28.11	Negative	NA	Negative	9.435	Positive	NA	Negative	NA	Negative	NA	Negative	31.85	Negative	33.3	Negative	NA	Negative	NA	Negative	NA	NonDetect	29.84
485	N110701	2015-11-07 20:10:41+00:00	2015-11-08 19:53:51+00:00	Netrakona	Ward No-09	Parla	28.735	Negative	NA	Negative	NA	Negative	NA	Negative	31.76	Negative	NA	Negative	30.66	Negative	NA	Negative	NA	Negative	NA	Negative	NA	Negative	NA	Negative	13.695	Positive	NA	Negative	NA	Negative	29.57	Negative	25.185	Positive	NA	Negative	NA	Negative	34.2	Negative	NA	NonDetect	27.95
486	N110702	2015-11-07 04:45:33+00:00	2015-11-09 07:07:30+00:00	Netrakona	Kailati	Bara Kailati	NA	Negative	NA	Negative	NA	Negative	NA	Negative	28.125	Negative	NA	Negative	NA	Negative	NA	Negative	NA	Negative	NA	Negative	34.69	Negative	NA	Negative	15.275	Positive	NA	Negative	NA	Negative	28.785	Negative	NA	Negative	NA	Negative	NA	Negative	NA	Negative	NA	NonDetect	28.735
487	N110703	2015-11-07 06:10:02+00:00	2015-11-09 04:35:47+00:00	Netrakona	Kaliara Gabragat	Kumarpur	19.925	Positive	NA	Negative	NA	Negative	NA	Negative	NA	Negative	NA	Negative	25.96	Positive	33.5	Negative	29.77	Negative	NA	Negative	29.12	Negative	NA	Negative	10.245	Positive	NA	Negative	NA	Negative	21.545	Positive	20.855	Positive	28.29	Negative	NA	Negative	27.985	Maybe	28.55	Negative	28.37
488	N110704	2015-11-07 06:45:00+00:00	2015-11-08 04:48:25+00:00	Netrakona	Dakshin Bishiura	Sreepur Bali	28.01	Negative	NA	Negative	NA	Negative	NA	Negative	32.025	Negative	27.8	Maybe	NA	Negative	29.56	Negative	NA	Negative	NA	Negative	30.71	Negative	NA	Negative	11.93	Positive	NA	Negative	NA	Negative	NA	Negative	27.4	Maybe	24.5	Positive	NA	Negative	23.085	Positive	31.395	Negative	NA
489	N110705	2015-11-07 10:40:41+00:00	2015-11-09 04:37:31+00:00	Netrakona	Ward No-09	Nizampur	NA	NA	NA	NA	NA	NA	NA	NA	NA	NA	NA	NA	NA	NA	NA	NA	NA	NA	NA	NA	NA	NA	NA	NA	NA	NA	NA	NA	NA	NA	NA	NA	NA	NA	NA	NA	NA	NA	NA	NA	NA	NA	NA
490	N110706	2015-11-07 16:00:17+00:00	2015-11-08 05:00:13+00:00	Netrakona	Ward No-07	Katly	NA	NA	NA	NA	NA	NA	NA	NA	NA	NA	NA	NA	NA	NA	NA	NA	NA	NA	NA	NA	NA	NA	NA	NA	NA	NA	NA	NA	NA	NA	NA	NA	NA	NA	NA	NA	NA	NA	NA	NA	NA	NA	NA
491	N110801	2015-11-08 04:50:35+00:00	2015-11-09 06:40:27+00:00	Netrakona	Amtala	Debpur	NA	NA	NA	NA	NA	NA	NA	NA	NA	NA	NA	NA	NA	NA	NA	NA	NA	NA	NA	NA	NA	NA	NA	NA	NA	NA	NA	NA	NA	NA	NA	NA	NA	NA	NA	NA	NA	NA	NA	NA	NA	NA	NA
492	N110802	2015-11-08 22:45:55+00:00	2015-11-09 04:40:18+00:00	Netrakona	Ward No-07	Katly	NA	NA	NA	NA	NA	NA	NA	NA	NA	NA	NA	NA	NA	NA	NA	NA	NA	NA	NA	NA	NA	NA	NA	NA	NA	NA	NA	NA	NA	NA	NA	NA	NA	NA	NA	NA	NA	NA	NA	NA	NA	NA	NA
493	N110803	2015-11-08 08:55:16+00:00	2015-11-09 07:15:13+00:00	Netrakona	Balaishimul	Aralia	NA	Negative	NA	Negative	NA	Negative	NA	Negative	NA	Negative	NA	Negative	NA	Negative	NA	Negative	NA	Negative	NA	Negative	29.56	Negative	NA	Negative	16.885	Positive	NA	Negative	NA	Negative	NA	Negative	NA	Negative	NA	Negative	NA	Negative	NA	Negative	NA	NonDetect	34.05
494	N110804	2015-11-09 00:25:01+00:00	2015-11-09 04:50:37+00:00	Netrakona	Lakshmiganj	Lakshmiganj	NA	Negative	NA	Negative	NA	Negative	34.41	Negative	NA	Negative	NA	Negative	28.52	Negative	25.61	Positive	NA	Negative	NA	Negative	30.085	Negative	NA	Negative	19.295	Positive	33.99	Negative	NA	Negative	NA	Negative	NA	Negative	27.26	Maybe	NA	Negative	32.9	Negative	NA	NonDetect	NA
495	N110805	2015-11-08 13:55:58+00:00	2015-11-09 05:20:44+00:00	Netrakona	Narandia	Iaran	NA	Negative	NA	Negative	NA	Negative	NA	Negative	NA	Negative	NA	Negative	NA	Negative	33.81	Negative	NA	Negative	NA	Negative	NA	Negative	NA	Negative	11.625	Positive	NA	Negative	NA	Negative	NA	Negative	31.845	Negative	NA	Negative	NA	Negative	NA	Negative	NA	NonDetect	34.44
496	N110806	2015-11-08 13:15:07+00:00	2015-11-09 04:40:25+00:00	Netrakona	Dalpa	Chatal	NA	Negative	NA	Negative	NA	Negative	NA	Negative	NA	Negative	NA	Negative	NA	Negative	NA	Negative	NA	Negative	NA	Negative	NA	Negative	NA	Negative	14.665	Positive	NA	Negative	NA	Negative	NA	Negative	NA	Negative	25.53	Positive	28.53	Negative	NA	Negative	NA	NonDetect	NA
497	N110807	2015-11-09 03:30:53+00:00	2015-11-10 04:26:17+00:00	Netrakona	Maugati	Kanchanpur	NA	Negative	NA	Negative	NA	Negative	NA	Negative	NA	Negative	NA	Negative	27.645	Maybe	NA	Negative	NA	Negative	NA	Negative	32.035	Negative	NA	Negative	12.37	Positive	NA	Negative	NA	Negative	NA	Negative	NA	Negative	15.08	Positive	NA	Negative	NA	Negative	NA	NonDetect	NA
498	N110901	2015-11-08 20:22:56+00:00	2015-11-10 04:20:20+00:00	Netrakona	Dhala Mulgaon	Dhala Mulgaon	NA	Negative	NA	Negative	NA	Negative	NA	Negative	NA	Negative	NA	Negative	26.86	Maybe	NA	Negative	NA	Negative	NA	Negative	33.93	Negative	NA	Negative	13.765	Positive	NA	Negative	26.545	Maybe	23.43	Positive	22.85	Positive	17.715	Positive	NA	Negative	NA	Negative	NA	NonDetect	NA
499	N110902	2015-11-09 18:10:03+00:00	2015-11-10 00:00:19+00:00	Netrakona	Ward No-08	Nagra Dhakin	NA	Negative	NA	Negative	NA	Negative	NA	Negative	29.99	Negative	NA	Negative	27.255	Maybe	NA	Negative	31.105	Negative	NA	Negative	33.125	Negative	NA	Negative	14.43	Positive	NA	Negative	NA	Negative	NA	Negative	28.87	Negative	27.97	Maybe	NA	Negative	NA	Negative	NA	NonDetect	NA
500	N111001	2015-11-09 20:20:10+00:00	2015-11-10 08:00:05+00:00	Netrakona	Garadoba	Bandalal	NA	Negative	NA	Negative	NA	Negative	NA	Negative	NA	Negative	NA	Negative	27.22	Maybe	NA	Negative	NA	Negative	NA	Negative	NA	Negative	NA	Negative	25.265	Positive	NA	Negative	NA	Negative	NA	Negative	NA	Negative	NA	Negative	NA	Negative	NA	Negative	NA	NonDetect	NA
501	N111002	2015-11-09 23:20:37+00:00	2015-11-10 04:40:19+00:00	Netrakona	Challisha	Dariyagi	NA	NA	NA	NA	NA	NA	NA	NA	NA	NA	NA	NA	NA	NA	NA	NA	NA	NA	NA	NA	NA	NA	NA	NA	NA	NA	NA	NA	NA	NA	NA	NA	NA	NA	NA	NA	NA	NA	NA	NA	NA	NA	NA
502	N111101	2015-11-11 01:34:46+00:00	2015-11-12 01:00:01+00:00	Netrakona	Ward No-04	Baluakhali	NA	NA	NA	NA	NA	NA	NA	NA	NA	NA	NA	NA	NA	NA	NA	NA	NA	NA	NA	NA	NA	NA	NA	NA	NA	NA	NA	NA	NA	NA	NA	NA	NA	NA	NA	NA	NA	NA	NA	NA	NA	NA	NA
503	N111102	2015-11-11 03:50:55+00:00	2015-11-11 09:50:46+00:00	Netrakona	Ward No-07	Katly	NA	Negative	NA	Negative	NA	Negative	NA	Negative	32.295	Negative	28.13	Negative	26.86	Maybe	26.59	Maybe	NA	Negative	NA	Negative	34.52	Negative	NA	Negative	16.885	Positive	NA	Negative	NA	Negative	NA	Negative	NA	Negative	NA	Negative	NA	Negative	20.025	Positive	NA	NonDetect	28.17
504	N111103	2015-11-11 04:00:03+00:00	2015-11-11 09:30:11+00:00	Netrakona	Ward No-07	Katly	NA	NA	NA	NA	NA	NA	NA	NA	NA	NA	NA	NA	NA	NA	NA	NA	NA	NA	NA	NA	NA	NA	NA	NA	NA	NA	NA	NA	NA	NA	NA	NA	NA	NA	NA	NA	NA	NA	NA	NA	NA	NA	NA
505	N111104	2015-11-11 04:37:36+00:00	2015-11-12 05:00:21+00:00	Netrakona	Balaishimul	Basihati	NA	NA	NA	NA	NA	NA	NA	NA	NA	NA	NA	NA	NA	NA	NA	NA	NA	NA	NA	NA	NA	NA	NA	NA	NA	NA	NA	NA	NA	NA	NA	NA	NA	NA	NA	NA	NA	NA	NA	NA	NA	NA	NA
506	N111105	2015-11-11 04:38:19+00:00	2015-11-12 05:00:18+00:00	Netrakona	Balaishimul	Basihati	32.97	Negative	28.76	Negative	NA	Negative	NA	Negative	24.24	Positive	NA	Negative	26.75	Maybe	33.65	Negative	NA	Negative	NA	Negative	NA	Negative	NA	Negative	9.505	Positive	NA	Negative	NA	Negative	NA	Negative	31.805	Negative	28.21	Negative	NA	Negative	31.065	Negative	NA	NonDetect	32.215
507	N111106	2015-11-11 04:42:09+00:00	2015-11-12 05:00:18+00:00	Netrakona	Balaishimul	Basihati	34.15	Negative	NA	Negative	NA	Negative	NA	Negative	27.55	Maybe	NA	Negative	NA	Negative	NA	Negative	NA	Negative	NA	Negative	30.41	Negative	NA	Negative	9.625	Positive	NA	Negative	NA	Negative	NA	Negative	NA	Negative	NA	Negative	NA	Negative	28.78	Negative	NA	NonDetect	33.06
508	N111107	2015-11-11 05:12:59+00:00	2015-11-14 04:00:17+00:00	Netrakona	Rauha	Amli Keshabpur	NA	Negative	NA	Negative	NA	Negative	NA	Negative	25.165	Positive	NA	Negative	28.95	Negative	34.84	Negative	NA	Negative	NA	Negative	NA	Negative	NA	Negative	9.945	Positive	NA	Negative	NA	Negative	NA	Negative	NA	Negative	NA	Negative	NA	Negative	NA	Negative	NA	NonDetect	31.37
509	N111108	2015-11-11 05:55:08+00:00	2015-11-13 02:50:47+00:00	Netrakona	Bairati	Lunai Brahmapur	NA	Negative	NA	Negative	NA	Negative	NA	Negative	33.65	Negative	NA	Negative	26.61	Maybe	NA	Negative	NA	Negative	NA	Negative	34.595	Negative	NA	Negative	16.895	Positive	NA	Negative	NA	Negative	NA	Negative	NA	Negative	NA	Negative	NA	Negative	33.68	Negative	NA	NonDetect	32.38
510	N111109	2015-11-11 07:25:20+00:00	2015-11-12 06:15:01+00:00	Netrakona	Roypur	Fakirer Bazar	NA	Negative	27.47	Maybe	NA	Negative	NA	Negative	34.055	Negative	NA	Negative	28.41	Negative	NA	Negative	NA	Negative	NA	Negative	NA	Negative	NA	Negative	17.285	Positive	NA	Negative	NA	Negative	26.97	Maybe	NA	Negative	NA	Negative	NA	Negative	NA	Negative	NA	NonDetect	32.565
511	N111110	2015-11-11 06:41:18+00:00	2015-11-12 04:45:11+00:00	Netrakona	Ward No-07	Joynagar	NA	Negative	NA	Negative	NA	Negative	NA	Negative	29.605	Negative	NA	Negative	27.73	Maybe	30.315	Negative	NA	Negative	NA	Negative	NA	Negative	NA	Negative	13.905	Positive	NA	Negative	NA	Negative	NA	Negative	NA	Negative	NA	Negative	NA	Negative	33.35	Negative	NA	NonDetect	34.27
512	N111111	2015-11-11 07:50:58+00:00	2015-11-14 01:30:52+00:00	Netrakona	Baushi	Chanpur	NA	Negative	NA	Negative	NA	Negative	NA	Negative	NA	Negative	NA	Negative	28.47	Negative	NA	Negative	NA	Negative	NA	Negative	33.53	Negative	NA	Negative	19.78	Positive	NA	Negative	NA	Negative	NA	Negative	NA	Negative	28.78	Negative	NA	Negative	NA	Negative	30.19	Negative	33.065
513	N111112	2015-11-11 10:43:23+00:00	2015-11-12 04:30:09+00:00	Netrakona	Challisha	Lait	NA	Negative	NA	Negative	NA	Negative	34.88	Negative	NA	Negative	NA	Negative	26.365	Maybe	NA	Negative	NA	Negative	NA	Negative	NA	Negative	NA	Negative	15.89	Positive	NA	Negative	NA	Negative	NA	Negative	NA	Negative	NA	Negative	NA	Negative	NA	Negative	NA	NonDetect	29.58
514	N111113	2015-11-11 09:30:35+00:00	2015-11-12 04:30:39+00:00	Netrakona	Ward No-03	Pukuria	NA	Negative	NA	Negative	NA	Negative	NA	Negative	NA	Negative	NA	Negative	25.985	Positive	NA	Negative	NA	Negative	NA	Negative	NA	Negative	NA	Negative	20.12	Positive	NA	Negative	NA	Negative	NA	Negative	NA	Negative	NA	Negative	NA	Negative	NA	Negative	NA	NonDetect	NA
515	N111114	2015-11-11 12:40:48+00:00	2015-11-12 04:20:38+00:00	Netrakona	Gaglajur	Shyampur	NA	Negative	NA	Negative	NA	Negative	NA	Negative	32.47	Negative	NA	Negative	NA	Negative	NA	Negative	NA	Negative	NA	Negative	NA	Negative	NA	Negative	16.285	Positive	NA	Negative	NA	Negative	NA	Negative	31.04	Negative	NA	Negative	NA	Negative	NA	Negative	NA	NonDetect	NA
516	N111115	2015-11-11 17:00:33+00:00	2015-11-15 05:16:26+00:00	Netrakona	Maugati	Kanchanpur	NA	Negative	NA	Negative	NA	Negative	NA	Negative	34.98	Negative	NA	Negative	28.26	Negative	27.94	Maybe	NA	Negative	NA	Negative	25.99	Positive	NA	Negative	12.48	Positive	NA	Negative	NA	Negative	NA	Negative	NA	Negative	NA	Negative	24.735	Positive	34.05	Negative	27.78	Maybe	28.55
517	N111201	2015-11-11 20:40:09+00:00	2015-11-12 11:15:54+00:00	Netrakona	Lakshmiganj	Kamalgati	15.81	Positive	NA	Negative	NA	Negative	NA	Negative	32.24	Negative	24.74	Positive	27.24	Maybe	NA	Negative	NA	Negative	NA	Negative	29.79	Negative	NA	Negative	11.08	Positive	NA	Negative	24.285	Positive	NA	Negative	28.72	Negative	NA	Negative	NA	Negative	NA	Negative	NA	NonDetect	29.305
518	N111202	2015-11-12 02:20:42+00:00	2015-11-14 04:40:23+00:00	Netrakona	Ward No-03	Pukuria	NA	Negative	NA	Negative	NA	Negative	NA	Negative	30.48	Negative	NA	Negative	29.14	Negative	28.425	Negative	NA	Negative	NA	Negative	28.45	Negative	NA	Negative	10.12	Positive	NA	Negative	NA	Negative	NA	Negative	33.58	Negative	28.23	Negative	NA	Negative	NA	Negative	NA	NonDetect	30.54
519	N111203	2015-11-12 02:50:00+00:00	2015-11-12 15:35:32+00:00	Netrakona	Ward No-08	Nagra Uttar	23.23	Positive	NA	Negative	NA	Negative	NA	Negative	NA	Negative	NA	Negative	27.49	Maybe	33.15	Negative	NA	Negative	NA	Negative	28.4	Negative	NA	Negative	14.48	Positive	NA	Negative	NA	Negative	NA	Negative	34.505	Negative	NA	Negative	NA	Negative	NA	Negative	NA	NonDetect	NA
520	N111204	2015-11-12 06:50:13+00:00	2015-11-12 15:30:58+00:00	Netrakona	Singhar Bangla	Faridpur	NA	Negative	NA	Negative	NA	Negative	NA	Negative	NA	Negative	NA	Negative	29.21	Negative	NA	Negative	NA	Negative	NA	Negative	NA	Negative	NA	Negative	8.855	Positive	NA	Negative	25.835	Positive	NA	Negative	34.18	Negative	NA	Negative	NA	Negative	30.465	Negative	NA	NonDetect	NA
521	N111401	2015-11-14 00:20:28+00:00	2015-11-15 05:24:18+00:00	Netrakona	Barhatta	Bari	NA	Negative	NA	Negative	NA	Negative	NA	Negative	31.86	Negative	NA	Negative	31.06	Negative	NA	Negative	NA	Negative	NA	Negative	NA	Negative	NA	Negative	17.55	Positive	NA	Negative	NA	Negative	NA	Negative	NA	Negative	26.9	Maybe	NA	Negative	NA	Negative	NA	NonDetect	31.95
522	N111402	2015-11-14 06:45:48+00:00	2015-11-15 04:21:40+00:00	Netrakona	Challisha	Sanura	NA	Negative	NA	Negative	NA	Negative	NA	Negative	30.14	Negative	NA	Negative	25.36	Positive	31.925	Negative	NA	Negative	NA	Negative	30.14	Negative	NA	Negative	8.225	Positive	NA	Negative	28.235	Negative	NA	Negative	NA	Negative	NA	Negative	NA	Negative	34.27	Negative	NA	NonDetect	29.78
523	N111403	2015-11-14 07:20:13+00:00	2015-11-15 04:30:07+00:00	Netrakona	Kailati	Bil Tarakuri	NA	Negative	NA	Negative	NA	Negative	25.63	Positive	NA	Negative	25.035	Positive	NA	Negative	NA	Negative	NA	Negative	NA	Negative	32.855	Negative	NA	Negative	13.785	Positive	NA	Negative	NA	Negative	NA	Negative	NA	Negative	26.66	Maybe	NA	Negative	18.125	Positive	NA	NonDetect	27.615
524	N111404	2015-11-14 10:50:41+00:00	2015-11-15 05:00:22+00:00	Netrakona	Ward No-02	Dakhin Satpai Nadir Par(Palpar	NA	Negative	NA	Negative	NA	Negative	NA	Negative	NA	Negative	NA	Negative	29.75	Negative	NA	Negative	NA	Negative	NA	Negative	NA	Negative	27.97	Maybe	18.01	Positive	NA	Negative	NA	Negative	NA	Negative	NA	Negative	NA	Negative	NA	Negative	NA	Negative	NA	NonDetect	NA
525	N111405	2015-11-14 12:10:30+00:00	2015-11-17 00:00:43+00:00	Netrakona	Ward No-09	Kurpar	NA	Negative	NA	Negative	NA	Negative	NA	Negative	27.83	Maybe	NA	Negative	28.58	Negative	NA	Negative	NA	Negative	NA	Negative	NA	Negative	NA	Negative	12	Positive	NA	Negative	NA	Negative	NA	Negative	NA	Negative	NA	Negative	NA	Negative	NA	Negative	NA	NonDetect	33.39
526	N111406	2015-11-14 16:14:54+00:00	2015-11-15 04:30:25+00:00	Netrakona	Ward No-09	Kurpar	NA	Negative	NA	Negative	NA	Negative	NA	Negative	25.37	Positive	NA	Negative	30.43	Negative	NA	Negative	NA	Negative	NA	Negative	26.725	Maybe	NA	Negative	NA	Negative	NA	Negative	NA	Negative	NA	Negative	NA	Negative	22.72	Positive	NA	Negative	NA	Negative	NA	NonDetect	28.23
527	N111501	2015-11-14 20:34:57+00:00	2015-11-17 00:00:59+00:00	Netrakona	Singhar Bangla	Singhar Bangla	NA	NA	NA	NA	NA	NA	NA	NA	NA	NA	NA	NA	NA	NA	NA	NA	NA	NA	NA	NA	NA	NA	NA	NA	NA	NA	NA	NA	NA	NA	NA	NA	NA	NA	NA	NA	NA	NA	NA	NA	NA	NA	NA
528	N111502	2015-11-15 01:00:50+00:00	2015-11-17 05:00:52+00:00	Netrakona	Ward No-05	Islampur	NA	NA	NA	NA	NA	NA	NA	NA	NA	NA	NA	NA	NA	NA	NA	NA	NA	NA	NA	NA	NA	NA	NA	NA	NA	NA	NA	NA	NA	NA	NA	NA	NA	NA	NA	NA	NA	NA	NA	NA	NA	NA	NA
529	N111503	2015-11-15 03:15:26+00:00	2015-11-17 05:00:08+00:00	Netrakona	Ward No-01	Barsikura	NA	NA	NA	NA	NA	NA	NA	NA	NA	NA	NA	NA	NA	NA	NA	NA	NA	NA	NA	NA	NA	NA	NA	NA	NA	NA	NA	NA	NA	NA	NA	NA	NA	NA	NA	NA	NA	NA	NA	NA	NA	NA	NA
530	N111504	2015-11-15 03:50:02+00:00	2015-11-16 04:30:11+00:00	Netrakona	Singhar Bangla	Fatehpur	NA	Negative	NA	Negative	NA	Negative	NA	Negative	24.87	Positive	NA	Negative	NA	Negative	NA	Negative	NA	Negative	NA	Negative	32.88	Negative	NA	Negative	10.33	Positive	NA	Negative	NA	Negative	NA	Negative	NA	Negative	NA	Negative	NA	Negative	NA	Negative	NA	NonDetect	30.94
531	N111505	2015-11-15 04:30:21+00:00	2015-11-17 05:20:43+00:00	Netrakona	Sarmaisa	Mataikata	NA	Negative	NA	Negative	NA	Negative	NA	Negative	28.95	Negative	NA	Negative	26.445	Maybe	30.12	Negative	NA	Negative	NA	Negative	32.06	Negative	NA	Negative	12.415	Positive	NA	Negative	NA	Negative	NA	Negative	29.89	Negative	NA	Negative	NA	Negative	NA	Negative	NA	NonDetect	NA
532	N111506	2015-11-15 04:40:18+00:00	2015-11-16 04:00:48+00:00	Netrakona	Challisha	Purba Bamanmoha	NA	Negative	NA	Negative	NA	Negative	NA	Negative	22.655	Positive	NA	Negative	29.51	Negative	33.07	Negative	NA	Negative	NA	Negative	NA	Negative	NA	Negative	11.215	Positive	NA	Negative	NA	Negative	NA	Negative	NA	Negative	NA	Negative	NA	Negative	NA	Negative	NA	NonDetect	26.79
533	N111507	2015-11-15 05:15:38+00:00	2015-11-17 05:30:36+00:00	Netrakona	Baushi	Baushi	NA	NA	NA	NA	NA	NA	NA	NA	NA	NA	NA	NA	NA	NA	NA	NA	NA	NA	NA	NA	NA	NA	NA	NA	NA	NA	NA	NA	NA	NA	NA	NA	NA	NA	NA	NA	NA	NA	NA	NA	NA	NA	NA
534	N111508	2015-11-15 05:25:23+00:00	2015-11-16 04:22:28+00:00	Netrakona	NA	NA	NA	Negative	NA	Negative	NA	Negative	NA	Negative	NA	Negative	NA	Negative	NA	Negative	NA	Negative	NA	Negative	NA	Negative	NA	Negative	NA	Negative	19.645	Positive	NA	Negative	NA	Negative	NA	Negative	NA	Negative	27.71	Maybe	NA	Negative	NA	Negative	NA	NonDetect	NA
535	N111509	2015-11-15 05:30:20+00:00	2015-11-17 05:05:25+00:00	Netrakona	Roypur	Naya Para	NA	Negative	NA	Negative	NA	Negative	NA	Negative	NA	Negative	NA	Negative	27.3	Maybe	NA	Negative	NA	Negative	NA	Negative	NA	Negative	NA	Negative	20.36	Positive	NA	Negative	NA	Negative	NA	Negative	NA	Negative	NA	Negative	NA	Negative	33.69	Negative	NA	NonDetect	32.215
536	N111510	2015-11-15 05:45:47+00:00	2015-11-17 05:30:02+00:00	Netrakona	Ward No-09	Kurpar	NA	Negative	NA	Negative	NA	Negative	NA	Negative	29.635	Negative	NA	Negative	26.52	Maybe	NA	Negative	25.455	Positive	NA	Negative	29.765	Negative	NA	Negative	16.75	Positive	NA	Negative	NA	Negative	NA	Negative	NA	Negative	NA	Negative	NA	Negative	NA	Negative	NA	NonDetect	NA
537	N111511	2015-11-15 06:35:29+00:00	2015-11-15 12:00:17+00:00	Netrakona	Purbadhala	Purbadhala	NA	Negative	NA	Negative	NA	Negative	NA	Negative	29.91	Negative	NA	Negative	28.285	Negative	NA	Negative	NA	Negative	NA	Negative	33.12	Negative	NA	Negative	15.285	Positive	NA	Negative	NA	Negative	NA	Negative	NA	Negative	NA	Negative	NA	Negative	NA	Negative	NA	NonDetect	NA
538	N111512	2015-11-15 06:15:35+00:00	2015-11-16 04:15:30+00:00	Netrakona	Amtala	Bishwanathpur	NA	NA	NA	NA	NA	NA	NA	NA	NA	NA	NA	NA	NA	NA	NA	NA	NA	NA	NA	NA	NA	NA	NA	NA	NA	NA	NA	NA	NA	NA	NA	NA	NA	NA	NA	NA	NA	NA	NA	NA	NA	NA	NA
539	N111513	2015-11-15 06:55:25+00:00	2015-11-16 01:00:07+00:00	Netrakona	Duaz	Jogir Nagua	NA	Negative	NA	Negative	NA	Negative	NA	Negative	30.78	Negative	22.355	Positive	NA	Negative	32.06	Negative	NA	Negative	NA	Negative	32.33	Negative	NA	Negative	14.335	Positive	NA	Negative	NA	Negative	NA	Negative	NA	Negative	NA	Negative	NA	Negative	17.395	Positive	NA	NonDetect	28.49
540	N111515	2015-11-15 07:15:47+00:00	2015-11-17 06:12:36+00:00	Netrakona	Rauha	Hasimpur	NA	Negative	NA	Negative	NA	Negative	NA	Negative	NA	Negative	NA	Negative	NA	Negative	NA	Negative	NA	Negative	NA	Negative	33.9	Negative	NA	Negative	15.235	Positive	NA	Negative	NA	Negative	NA	Negative	NA	Negative	NA	Negative	NA	Negative	15.46	Positive	NA	NonDetect	27.105
541	N111516	2015-11-15 08:25:16+00:00	2015-11-17 06:10:59+00:00	Netrakona	Kailati	Kutubpur	NA	Negative	NA	Negative	NA	Negative	NA	Negative	26.6	Maybe	NA	Negative	28.41	Negative	NA	Negative	NA	Negative	NA	Negative	30.57	Negative	NA	Negative	9.125	Positive	NA	Negative	NA	Negative	NA	Negative	NA	Negative	27.055	Maybe	NA	Negative	28.7	Negative	NA	NonDetect	31.265
542	N111517	2015-11-15 11:00:08+00:00	2015-11-18 05:07:53+00:00	Netrakona	Kailati	Beltali	NA	Negative	NA	Negative	NA	Negative	NA	Negative	22.405	Positive	NA	Negative	29.67	Negative	NA	Negative	NA	Negative	NA	Negative	29.405	Negative	NA	Negative	11.255	Positive	NA	Negative	NA	Negative	21.5	Positive	NA	Negative	17.93	Positive	NA	Negative	26.49	Maybe	NA	NonDetect	32.685
543	N111518	2015-11-15 13:40:47+00:00	2015-11-17 05:00:22+00:00	Netrakona	Challisha	Challisha	NA	Negative	NA	Negative	18.865	Positive	NA	Negative	NA	Negative	18.96	Positive	27.19	Maybe	27.34	Maybe	NA	Negative	NA	Negative	24.22	Positive	NA	Negative	8.89	Positive	NA	Negative	NA	Negative	NA	Negative	33.635	Negative	28.74	Negative	NA	Negative	24.23	Positive	NA	NonDetect	29.315
544	N111601	2015-11-15 18:40:55+00:00	2015-11-16 06:30:37+00:00	Netrakona	Ward No-09	Challish Para	NA	NA	NA	NA	NA	NA	NA	NA	NA	NA	NA	NA	NA	NA	NA	NA	NA	NA	NA	NA	NA	NA	NA	NA	NA	NA	NA	NA	NA	NA	NA	NA	NA	NA	NA	NA	NA	NA	NA	NA	NA	NA	NA
545	N111602	2015-11-15 20:10:45+00:00	2015-11-17 05:00:49+00:00	Netrakona	Ward No-02	Satpai Town	NA	Negative	NA	Negative	NA	Negative	NA	Negative	NA	Negative	23.175	Positive	27.44	Maybe	NA	Negative	NA	Negative	NA	Negative	33.24	Negative	NA	Negative	13.495	Positive	NA	Negative	NA	Negative	NA	Negative	NA	Negative	26.05	Maybe	NA	Negative	NA	Negative	NA	NonDetect	28.505
546	N111603	2015-11-16 01:00:55+00:00	2015-11-17 07:40:55+00:00	Netrakona	Sarmaisa	Pokhalgaon	NA	Negative	NA	Negative	NA	Negative	NA	Negative	NA	Negative	NA	Negative	29.35	Negative	33.18	Negative	NA	Negative	NA	Negative	33.42	Negative	NA	Negative	10.83	Positive	NA	Negative	NA	Negative	NA	Negative	NA	Negative	NA	Negative	NA	Negative	29.175	Negative	NA	NonDetect	30.855
547	N111604	2015-11-16 02:46:50+00:00	2015-11-17 04:42:20+00:00	Netrakona	Ward No-05	Islampur	NA	Negative	NA	Negative	NA	Negative	NA	Negative	29.585	Negative	NA	Negative	NA	Negative	NA	Negative	NA	Negative	NA	Negative	33.855	Negative	NA	Negative	17	Positive	NA	Negative	NA	Negative	NA	Negative	NA	Negative	NA	Negative	NA	Negative	20.025	Positive	NA	NonDetect	26.53
548	N111605	2015-11-16 04:00:04+00:00	2015-11-16 09:46:39+00:00	Netrakona	Purbadhala	Tarakanda	NA	Negative	NA	Negative	NA	Negative	NA	Negative	31.495	Negative	NA	Negative	32.8	Negative	NA	Negative	NA	Negative	NA	Negative	NA	Negative	NA	Negative	18.22	Positive	NA	Negative	29.78	Negative	NA	Negative	NA	Negative	NA	Negative	NA	Negative	NA	Negative	NA	NonDetect	27.97
549	N111606	2015-11-16 05:30:09+00:00	2015-11-17 05:10:11+00:00	Netrakona	Challisha	Sakhua	NA	NA	NA	NA	NA	NA	NA	NA	NA	NA	NA	NA	NA	NA	NA	NA	NA	NA	NA	NA	NA	NA	NA	NA	NA	NA	NA	NA	NA	NA	NA	NA	NA	NA	NA	NA	NA	NA	NA	NA	NA	NA	NA
550	N111607	2015-11-16 06:40:52+00:00	2015-11-17 07:50:34+00:00	Netrakona	Ward No-03	Mahendarapur	NA	Negative	NA	Negative	NA	Negative	NA	Negative	31.79	Negative	21.55	Positive	26.26	Maybe	33.37	Negative	NA	Negative	NA	Negative	30.06	Negative	NA	Negative	11.765	Positive	NA	Negative	NA	Negative	NA	Negative	NA	Negative	NA	Negative	NA	Negative	34.76	Negative	NA	NonDetect	28.15
551	N111608	2015-11-16 06:45:24+00:00	2015-11-17 04:50:19+00:00	Netrakona	Medni	Krishnapur	NA	Negative	NA	Negative	NA	Negative	NA	Negative	25.71	Positive	NA	Negative	27.43	Maybe	27.95	Maybe	NA	Negative	NA	Negative	34.71	Negative	NA	Negative	11.09	Positive	NA	Negative	NA	Negative	NA	Negative	NA	Negative	14.2	Positive	NA	Negative	NA	Negative	NA	NonDetect	33.83
552	N111609	2015-11-16 07:00:39+00:00	2015-11-18 04:12:00+00:00	Netrakona	Baniajan	NA	NA	Negative	NA	Negative	NA	Negative	25.33	Positive	27.71	Maybe	27.445	Maybe	NA	Negative	NA	Negative	NA	Negative	NA	Negative	NA	Negative	NA	Negative	9.815	Positive	NA	Negative	NA	Negative	21.325	Positive	NA	Negative	20.705	Positive	20.795	Positive	34.25	Negative	NA	NonDetect	NA
553	N111610	2015-11-16 08:00:18+00:00	2015-11-18 04:10:28+00:00	Netrakona	Rauha	Kunia Mulnachati	27.425	Maybe	NA	Negative	NA	Negative	NA	Negative	26.99	Maybe	NA	Negative	28.26	Negative	NA	Negative	NA	Negative	NA	Negative	NA	Negative	NA	Negative	13.405	Positive	NA	Negative	NA	Negative	NA	Negative	NA	Negative	23.9	Positive	NA	Negative	NA	Negative	NA	NonDetect	30.725
554	N111611	2015-11-16 09:40:50+00:00	2015-11-17 05:10:37+00:00	Netrakona	Ward No-09	Dharia	NA	Negative	NA	Negative	NA	Negative	NA	Negative	NA	Negative	NA	Negative	28.36	Negative	NA	Negative	NA	Negative	NA	Negative	32.73	Negative	NA	Negative	9.07	Positive	NA	Negative	NA	Negative	NA	Negative	NA	Negative	NA	Negative	NA	Negative	NA	Negative	NA	NonDetect	31.315
555	N111612	2015-11-16 10:15:03+00:00	2015-11-18 04:02:50+00:00	Netrakona	Challisha	Challisha	NA	Negative	NA	Negative	NA	Negative	NA	Negative	NA	Negative	NA	Negative	NA	Negative	NA	Negative	NA	Negative	NA	Negative	NA	Negative	NA	Negative	20.58	Positive	NA	Negative	NA	Negative	NA	Negative	26.82	Maybe	NA	Negative	NA	Negative	21.15	Positive	NA	NonDetect	29.575
556	N111613	2015-11-16 10:25:02+00:00	2015-11-17 04:55:13+00:00	Netrakona	Thakurakona	Asadati	NA	Negative	NA	Negative	NA	Negative	NA	Negative	23.15	Positive	NA	Negative	29.305	Negative	34.82	Negative	NA	Negative	NA	Negative	31.1	Negative	NA	Negative	10.665	Positive	NA	Negative	26.295	Maybe	27.86	Maybe	12.85	Positive	NA	Negative	NA	Negative	NA	Negative	NA	NonDetect	31.88
557	N111614	2015-11-16 11:00:05+00:00	2015-11-18 06:00:15+00:00	Netrakona	Loneshwar	Khila Para	NA	Negative	NA	Negative	NA	Negative	NA	Negative	NA	Negative	NA	Negative	27.55	Maybe	NA	Negative	NA	Negative	NA	Negative	NA	Negative	NA	Negative	17.7	Positive	NA	Negative	NA	Negative	28	NA	25.56	Positive	NA	Negative	NA	Negative	NA	Negative	NA	NonDetect	34.58
558	N111615	2015-11-16 15:15:23+00:00	2015-11-18 04:31:38+00:00	Netrakona	Singhar Bangla	Kandulia	NA	Negative	NA	Negative	NA	Negative	NA	Negative	NA	Negative	NA	Negative	NA	Negative	26.565	Maybe	NA	Negative	NA	Negative	27.02	Maybe	NA	Negative	8.25	Positive	NA	Negative	NA	Negative	NA	Negative	30.675	Negative	27.03	Maybe	NA	Negative	30.545	Negative	NA	NonDetect	30.315
559	N111616	2015-11-16 15:30:43+00:00	2015-11-17 04:44:50+00:00	Netrakona	Sonai	Dakshin Mansurpur	NA	Negative	NA	Negative	NA	Negative	NA	Negative	NA	Negative	17.99	Positive	NA	Negative	NA	Negative	NA	Negative	NA	Negative	31.81	Negative	NA	Negative	10.23	Positive	NA	Negative	NA	Negative	NA	Negative	26.92	Maybe	NA	Negative	NA	Negative	29.23	Negative	NA	NonDetect	34.73
560	N111701	2015-11-16 23:30:35+00:00	2015-11-18 06:15:15+00:00	Netrakona	Ward No-05	Malni	NA	Negative	NA	Negative	NA	Negative	NA	Negative	34.92	Negative	NA	Negative	NA	Negative	29.035	Negative	NA	Negative	NA	Negative	29.76	Negative	26.92	Maybe	10.605	Positive	NA	Negative	27.64	Maybe	NA	Negative	NA	Negative	NA	Negative	NA	Negative	NA	Negative	NA	NonDetect	33.75
561	N111702	2015-11-17 02:55:11+00:00	2015-11-18 05:30:45+00:00	Netrakona	Ward No-03	Pukuria	NA	NA	NA	NA	NA	NA	NA	NA	NA	NA	NA	NA	NA	NA	NA	NA	NA	NA	NA	NA	NA	NA	NA	NA	NA	NA	NA	NA	NA	NA	NA	NA	NA	NA	NA	NA	NA	NA	NA	NA	NA	NA	NA
562	N111703	2015-11-17 04:10:25+00:00	2015-11-18 04:50:20+00:00	Netrakona	Ward No-03	Bataiapara(Part)	NA	Negative	NA	Negative	NA	Negative	NA	Negative	28.2	Negative	NA	Negative	NA	Negative	NA	Negative	NA	Negative	NA	Negative	NA	Negative	NA	Negative	13.23	Positive	NA	Negative	28.24	Negative	NA	Negative	22.925	Positive	NA	Negative	NA	Negative	NA	Negative	NA	NonDetect	29.2
563	N111704	2015-11-17 05:00:43+00:00	2015-11-18 04:40:48+00:00	Netrakona	Ward No-02	Satpai Town	NA	NA	NA	NA	NA	NA	NA	NA	NA	NA	NA	NA	NA	NA	NA	NA	NA	NA	NA	NA	NA	NA	NA	NA	NA	NA	NA	NA	NA	NA	NA	NA	NA	NA	NA	NA	NA	NA	NA	NA	NA	NA	NA
564	N111705	2015-11-17 06:50:39+00:00	2015-11-18 04:07:24+00:00	Netrakona	Amtala	Shibprasadpur	NA	Negative	NA	Negative	NA	Negative	NA	Negative	NA	Negative	NA	Negative	NA	Negative	31.725	Negative	NA	Negative	NA	Negative	32.58	Negative	NA	Negative	15.62	Positive	NA	Negative	NA	Negative	NA	Negative	NA	Negative	NA	Negative	NA	Negative	33.235	Negative	NA	NonDetect	34.255
565	N111706	2015-11-17 08:30:08+00:00	2015-11-18 06:30:22+00:00	Netrakona	Baushi	Deopur	NA	Negative	NA	Negative	NA	Negative	NA	Negative	30.05	Negative	NA	Negative	NA	Negative	34.305	Negative	NA	Negative	NA	Negative	NA	Negative	NA	Negative	14.06	Positive	NA	Negative	NA	Negative	19.52	Positive	19.695	Positive	NA	Negative	NA	Negative	NA	Negative	NA	NonDetect	NA
566	N111707	2015-11-17 10:05:23+00:00	2015-11-18 04:08:46+00:00	Netrakona	Ward No-03	Chak Para Purba	NA	Negative	NA	Negative	NA	Negative	NA	Negative	NA	Negative	NA	Negative	NA	Negative	NA	Negative	NA	Negative	NA	Negative	NA	Negative	NA	Negative	14.51	Positive	NA	Negative	NA	Negative	NA	Negative	NA	Negative	27.765	Maybe	NA	Negative	26.185	Maybe	NA	NonDetect	34.51
567	N111708	2015-11-17 11:45:10+00:00	2015-11-19 04:00:17+00:00	Netrakona	Kalmakanda	Bahadurkanda	NA	Negative	NA	Negative	NA	Negative	NA	Negative	NA	Negative	NA	Negative	NA	Negative	NA	Negative	NA	Negative	NA	Negative	NA	Negative	NA	Negative	18.86	Positive	NA	Negative	NA	Negative	NA	Negative	NA	Negative	28.8	Negative	NA	Negative	NA	Negative	NA	NonDetect	NA
568	N111709	2015-11-17 01:15:48+00:00	2015-11-19 04:42:25+00:00	Netrakona	Kailati	Balidarun (Darunbali)	NA	NA	NA	NA	NA	NA	NA	NA	NA	NA	NA	NA	NA	NA	NA	NA	NA	NA	NA	NA	NA	NA	NA	NA	NA	NA	NA	NA	NA	NA	NA	NA	NA	NA	NA	NA	NA	NA	NA	NA	NA	NA	NA
569	N111710	2015-11-17 15:00:18+00:00	2015-11-18 04:30:08+00:00	Netrakona	Sonai	Swalpa Sonai	NA	Negative	NA	Negative	NA	Negative	NA	Negative	27.405	Maybe	NA	Negative	NA	Negative	34.22	Negative	NA	Negative	NA	Negative	31.86	Negative	NA	Negative	8.93	Positive	NA	Negative	NA	Negative	NA	Negative	28.65	Negative	NA	Negative	NA	Negative	19.78	Positive	NA	NonDetect	28.3
570	N111711	2015-11-17 16:00:43+00:00	2015-11-18 06:06:34+00:00	Netrakona	Medni	Saidpur	NA	Negative	NA	Negative	NA	Negative	NA	Negative	27.49	Maybe	21.565	Positive	NA	Negative	31	Negative	NA	Negative	NA	Negative	NA	Negative	NA	Negative	13.04	Positive	NA	Negative	NA	Negative	18.675	Positive	18.36	Positive	NA	Negative	NA	Negative	NA	Negative	NA	NonDetect	32.98
571	N111801	2015-11-17 19:00:25+00:00	2015-11-18 05:05:26+00:00	Netrakona	Sarmaisa	Rupchanpur	NA	NA	NA	NA	NA	NA	NA	NA	NA	NA	NA	NA	NA	NA	NA	NA	NA	NA	NA	NA	NA	NA	NA	NA	NA	NA	NA	NA	NA	NA	NA	NA	NA	NA	NA	NA	NA	NA	NA	NA	NA	NA	NA
572	N111802	2015-11-18 03:35:46+00:00	2015-11-19 05:00:42+00:00	Netrakona	Madanpur	Narendranagar	NA	Negative	NA	Negative	NA	Negative	NA	Negative	25.88	Positive	27.97	Maybe	NA	Negative	NA	Negative	NA	Negative	NA	Negative	31.08	Negative	NA	Negative	13.51	Positive	NA	Negative	NA	Negative	15.865	Positive	15.45	Positive	22.725	Positive	NA	Negative	NA	Negative	NA	NonDetect	32.74
573	N111803	2015-11-18 05:00:10+00:00	2015-11-21 04:00:07+00:00	Netrakona	Ward No-09	Challisa Kanda	NA	Negative	NA	Negative	NA	Negative	NA	Negative	34.4	Negative	26.855	Maybe	NA	Negative	NA	Negative	NA	Negative	NA	Negative	31.97	Negative	NA	Negative	16.585	Positive	NA	Negative	NA	Negative	NA	Negative	NA	Negative	NA	Negative	NA	Negative	NA	Negative	NA	NonDetect	NA
574	N111804	2015-11-18 05:44:18+00:00	2015-11-19 04:40:28+00:00	Netrakona	Narandia	Baoidahar	NA	Negative	NA	Negative	NA	Negative	NA	Negative	NA	Negative	NA	Negative	NA	Negative	NA	Negative	NA	Negative	NA	Negative	NA	Negative	NA	Negative	23.575	Positive	NA	Negative	NA	Negative	NA	Negative	NA	Negative	NA	Negative	NA	Negative	NA	Negative	NA	NonDetect	34.47
575	N111805	2015-11-18 09:30:38+00:00	2015-11-19 05:00:50+00:00	Netrakona	Medni	Purba Uluati	NA	NA	NA	NA	NA	NA	NA	NA	NA	NA	NA	NA	NA	NA	NA	NA	NA	NA	NA	NA	NA	NA	NA	NA	NA	NA	NA	NA	NA	NA	NA	NA	NA	NA	NA	NA	NA	NA	NA	NA	NA	NA	NA
576	N111806	2015-11-18 10:00:01+00:00	2015-11-19 05:00:44+00:00	Netrakona	Bairati	Lalchapur	NA	Negative	NA	Negative	NA	Negative	NA	Negative	NA	Negative	NA	Negative	29.14	Negative	NA	Negative	NA	Negative	27.5	Maybe	NA	Negative	NA	Negative	13.325	Positive	NA	Negative	NA	Negative	NA	Negative	28.03	Negative	NA	Negative	NA	Negative	NA	Negative	NA	NonDetect	NA
577	N111807	2015-11-18 10:30:53+00:00	2015-11-19 01:00:48+00:00	Netrakona	Challisha	Uttar Bishiura	NA	Negative	NA	Negative	NA	Negative	NA	Negative	NA	Negative	NA	Negative	NA	Negative	34.73	Negative	NA	Negative	NA	Negative	31.48	Negative	NA	Negative	11.94	Positive	NA	Negative	NA	Negative	NA	Negative	28.54	Negative	NA	Negative	NA	Negative	NA	Negative	NA	NonDetect	NA
578	N111808	2015-11-18 12:00:04+00:00	2015-11-19 04:00:01+00:00	Netrakona	Ward No-07	Katly	NA	Negative	NA	Negative	NA	Negative	NA	Negative	NA	Negative	NA	Negative	NA	Negative	NA	Negative	NA	Negative	NA	Negative	NA	Negative	NA	Negative	25.81	Positive	NA	Negative	NA	Negative	NA	Negative	NA	Negative	28.7	Negative	NA	Negative	NA	Negative	NA	NonDetect	NA
579	N111809	2015-11-18 14:30:37+00:00	2015-11-19 04:40:57+00:00	Netrakona	Dakshin Bishiura	Adpur	NA	Negative	NA	Negative	NA	Negative	NA	Negative	30.915	Negative	NA	Negative	NA	Negative	NA	Negative	NA	Negative	NA	Negative	NA	Negative	NA	Negative	18.395	Positive	NA	Negative	NA	Negative	NA	Negative	19.695	Positive	25.835	Positive	NA	Negative	NA	Negative	NA	NonDetect	NA
580	N111810	2015-11-18 15:27:06+00:00	2015-11-20 04:10:39+00:00	Netrakona	Ward No-04	Bahircha Para	NA	Negative	NA	Negative	NA	Negative	NA	Negative	NA	Negative	NA	Negative	NA	Negative	NA	Negative	NA	Negative	NA	Negative	NA	Negative	NA	Negative	22.57	Positive	NA	Negative	NA	Negative	NA	Negative	NA	Negative	NA	Negative	NA	Negative	NA	Negative	NA	NonDetect	NA
581	N111811	2015-11-18 15:40:35+00:00	2015-11-21 05:00:35+00:00	Netrakona	Medni	Kayrahati	NA	Negative	NA	Negative	NA	Negative	NA	Negative	27.745	Maybe	NA	Negative	NA	Negative	NA	Negative	NA	Negative	NA	Negative	NA	Negative	NA	Negative	15.07	Positive	NA	Negative	NA	Negative	NA	Negative	NA	Negative	NA	Negative	NA	Negative	NA	Negative	29.3	Negative	NA
582	N111812	2015-11-18 15:50:38+00:00	2015-11-19 01:00:44+00:00	Netrakona	Ward No-03	Mahendarapur	NA	Negative	NA	Negative	NA	Negative	NA	Negative	30.685	Negative	NA	Negative	29.96	Negative	NA	Negative	NA	Negative	NA	Negative	NA	Negative	NA	Negative	14.53	Positive	NA	Negative	NA	Negative	NA	Negative	NA	Negative	18.21	Positive	NA	Negative	NA	Negative	NA	NonDetect	33.795
583	N111901	2015-11-19 02:50:03+00:00	2015-11-21 05:00:38+00:00	Netrakona	Kailati	Char Para	NA	Negative	NA	Negative	27.13	Maybe	NA	Negative	NA	Negative	NA	Negative	28.075	Negative	33.165	Negative	NA	Negative	NA	Negative	20.885	Positive	NA	Negative	10.795	Positive	NA	Negative	NA	Negative	NA	Negative	15.33	Positive	NA	Negative	NA	Negative	28.55	Negative	NA	NonDetect	28.64
584	N111902	2015-11-19 03:30:29+00:00	2015-11-21 05:00:35+00:00	Netrakona	Ward No-02	Satpai Town	NA	NA	NA	NA	NA	NA	NA	NA	NA	NA	NA	NA	NA	NA	NA	NA	NA	NA	NA	NA	NA	NA	NA	NA	NA	NA	NA	NA	NA	NA	NA	NA	NA	NA	NA	NA	NA	NA	NA	NA	NA	NA	NA
585	N111903	2015-11-19 04:30:26+00:00	2015-11-20 11:00:17+00:00	Netrakona	Ward No-02	Satpai Town	NA	Negative	NA	Negative	NA	Negative	NA	Negative	31.505	Negative	NA	Negative	NA	Negative	28.76	Negative	NA	Negative	NA	Negative	NA	Negative	NA	Negative	12.86	Positive	NA	Negative	NA	Negative	NA	Negative	27.48	Maybe	34.86	Negative	NA	Negative	NA	Negative	NA	NonDetect	32.87
586	N111904	2015-11-19 04:30:17+00:00	2015-11-21 01:00:58+00:00	Netrakona	Rauha	Dudkuri	35	Negative	NA	Negative	NA	Negative	NA	Negative	28.69	Negative	NA	Negative	NA	Negative	29.545	Negative	NA	Negative	NA	Negative	30.59	Negative	NA	Negative	11.76	Positive	NA	Negative	NA	Negative	NA	Negative	NA	Negative	NA	Negative	NA	Negative	25.85	Positive	30.64	Negative	32.465
587	N111905	2015-11-19 05:35:28+00:00	2015-11-20 00:00:03+00:00	Netrakona	Madanpur	Chandankandi	NA	NA	NA	NA	NA	NA	NA	NA	NA	NA	NA	NA	NA	NA	NA	NA	NA	NA	NA	NA	NA	NA	NA	NA	NA	NA	NA	NA	NA	NA	NA	NA	NA	NA	NA	NA	NA	NA	NA	NA	NA	NA	NA
588	N111906	2015-11-19 05:40:13+00:00	2015-11-21 05:00:04+00:00	Netrakona	Ward No-02	Satpai Town	NA	Negative	NA	Negative	NA	Negative	NA	Negative	33.635	Negative	NA	Negative	NA	Negative	NA	Negative	NA	Negative	NA	Negative	NA	Negative	NA	Negative	16.615	Positive	NA	Negative	NA	Negative	NA	Negative	NA	Negative	27.96	Maybe	NA	Negative	NA	Negative	NA	NonDetect	NA
589	N111907	2015-11-19 06:45:54+00:00	2015-11-21 14:00:26+00:00	Netrakona	Ward No-03	Mahamudpur	NA	NA	NA	NA	NA	NA	NA	NA	NA	NA	NA	NA	NA	NA	NA	NA	NA	NA	NA	NA	NA	NA	NA	NA	NA	NA	NA	NA	NA	NA	NA	NA	NA	NA	NA	NA	NA	NA	NA	NA	NA	NA	NA
590	N111908	2015-11-19 07:20:03+00:00	2015-11-20 01:00:27+00:00	Netrakona	Asma	Asma	NA	Negative	NA	Negative	NA	Negative	NA	Negative	NA	Negative	NA	Negative	NA	Negative	NA	Negative	NA	Negative	NA	Negative	NA	Negative	NA	Negative	23.965	Positive	NA	Negative	NA	Negative	NA	Negative	NA	Negative	NA	Negative	NA	Negative	NA	Negative	NA	NonDetect	NA
591	N111909	2015-11-19 07:37:48+00:00	2015-11-21 02:00:03+00:00	Netrakona	Maugati	Kanchanpur	NA	NA	NA	NA	NA	NA	NA	NA	NA	NA	NA	NA	NA	NA	NA	NA	NA	NA	NA	NA	NA	NA	NA	NA	NA	NA	NA	NA	NA	NA	NA	NA	NA	NA	NA	NA	NA	NA	NA	NA	NA	NA	NA
592	N111910	2015-11-19 08:40:25+00:00	2015-11-21 03:00:52+00:00	Netrakona	Sarmaisa	Rameswarpur	NA	NA	NA	NA	NA	NA	NA	NA	NA	NA	NA	NA	NA	NA	NA	NA	NA	NA	NA	NA	NA	NA	NA	NA	NA	NA	NA	NA	NA	NA	NA	NA	NA	NA	NA	NA	NA	NA	NA	NA	NA	NA	NA
593	N111912	2015-11-19 10:05:42+00:00	2015-11-21 04:16:44+00:00	Netrakona	Ward No-07	Mukter Para	NA	Negative	NA	Negative	NA	Negative	NA	Negative	NA	Negative	NA	Negative	NA	Negative	NA	Negative	NA	Negative	NA	Negative	NA	Negative	NA	Negative	20.53	Positive	NA	Negative	NA	Negative	NA	Negative	28.14	Negative	NA	Negative	NA	Negative	28.31	Negative	NA	NonDetect	28.815
594	N111913	2015-11-19 10:45:04+00:00	2015-11-19 22:10:30+00:00	Netrakona	Maghan Siadhar	Daspara	NA	NA	NA	NA	NA	NA	NA	NA	NA	NA	NA	NA	NA	NA	NA	NA	NA	NA	NA	NA	NA	NA	NA	NA	NA	NA	NA	NA	NA	NA	NA	NA	NA	NA	NA	NA	NA	NA	NA	NA	NA	NA	NA
595	N112101	2015-11-20 20:40:50+00:00	2015-11-22 05:50:46+00:00	Netrakona	Rauha	Bara Gara	NA	Negative	NA	Negative	NA	Negative	NA	Negative	NA	Negative	NA	Negative	NA	Negative	NA	Negative	NA	Negative	NA	Negative	NA	Negative	NA	Negative	24.92	Positive	NA	Negative	NA	Negative	NA	Negative	NA	Negative	NA	Negative	NA	Negative	28.28	Negative	NA	NonDetect	NA
596	N112102	2015-11-20 22:38:41+00:00	2015-11-22 04:40:53+00:00	Netrakona	Madanpur	Madanpur	25.74	Positive	NA	Negative	NA	Negative	NA	Negative	30.565	Negative	NA	Negative	NA	Negative	NA	Negative	NA	Negative	NA	Negative	34.65	Negative	NA	Negative	12.98	Positive	34.05	Negative	NA	Negative	NA	Negative	NA	Negative	NA	Negative	NA	Negative	NA	Negative	NA	NonDetect	28.765
597	N112103	2015-11-21 00:56:19+00:00	2015-11-22 05:00:45+00:00	Netrakona	Ward No-05	Islampur	NA	NA	NA	NA	NA	NA	NA	NA	NA	NA	NA	NA	NA	NA	NA	NA	NA	NA	NA	NA	NA	NA	NA	NA	NA	NA	NA	NA	NA	NA	NA	NA	NA	NA	NA	NA	NA	NA	NA	NA	NA	NA	NA
598	N112104	2015-11-21 03:00:30+00:00	2015-11-22 04:57:55+00:00	Netrakona	Madanpur	Nandipur	NA	Negative	NA	Negative	NA	Negative	NA	Negative	26.525	Maybe	21.995	Positive	NA	Negative	NA	Negative	NA	Negative	NA	Negative	33.3	Negative	NA	Negative	14.68	Positive	NA	Negative	NA	Negative	NA	Negative	28.62	Negative	21.235	Positive	NA	Negative	17.67	Positive	NA	NonDetect	NA
599	N112105	2015-11-21 03:25:54+00:00	2015-11-22 05:00:57+00:00	Netrakona	Ward No-03	Pukuria	NA	Negative	NA	Negative	NA	Negative	NA	Negative	NA	Negative	NA	Negative	NA	Negative	30.62	Negative	NA	Negative	NA	Negative	29.66	Negative	NA	Negative	13.91	Positive	NA	Negative	NA	Negative	NA	Negative	NA	Negative	NA	Negative	NA	Negative	24.79	Positive	NA	NonDetect	33.71
600	N112106	2015-11-21 03:30:16+00:00	2015-11-22 04:58:31+00:00	Netrakona	Kailati	Balidarun (Darunbali)	NA	Negative	NA	Negative	NA	Negative	NA	Negative	34.63	Negative	NA	Negative	NA	Negative	29.29	Negative	NA	Negative	NA	Negative	30.6	Negative	NA	Negative	11.89	Positive	NA	Negative	NA	Negative	NA	Negative	NA	Negative	NA	Negative	NA	Negative	NA	Negative	NA	NonDetect	NA
601	N112107	2015-11-21 03:30:00+00:00	2015-11-22 05:10:37+00:00	Netrakona	Kailati	Balidarun (Darunbali)	NA	Negative	NA	Negative	NA	Negative	NA	Negative	NA	Negative	NA	Negative	NA	Negative	NA	Negative	NA	Negative	NA	Negative	32.255	Negative	NA	Negative	13.06	Positive	NA	Negative	NA	Negative	NA	Negative	NA	Negative	28.005	Negative	NA	Negative	29.44	Negative	NA	NonDetect	28.225
602	N112108	2015-11-21 04:30:10+00:00	2015-11-22 01:00:09+00:00	Netrakona	Rauha	Rauha	NA	Negative	NA	Negative	NA	Negative	NA	Negative	NA	Negative	NA	Negative	NA	Negative	NA	Negative	NA	Negative	NA	Negative	NA	Negative	NA	Negative	27.495	Maybe	NA	Negative	NA	Negative	NA	Negative	28	NA	NA	Negative	NA	Negative	NA	Negative	NA	NonDetect	NA
603	N112109	2015-11-21 04:50:33+00:00	2015-11-22 05:00:51+00:00	Netrakona	Roypur	Dudhkora	NA	Negative	NA	Negative	NA	Negative	NA	Negative	26.74	Maybe	NA	Negative	NA	Negative	25.2	Positive	NA	Negative	NA	Negative	30.89	Negative	NA	Negative	12.575	Positive	NA	Negative	NA	Negative	NA	Negative	30.475	Negative	16.765	Positive	NA	Negative	NA	Negative	NA	NonDetect	34.82
604	N112110	2015-11-21 04:50:03+00:00	2015-11-22 05:00:17+00:00	Netrakona	Roypur	Dudhkora	NA	Negative	NA	Negative	NA	Negative	NA	Negative	30.475	Negative	23.805	Positive	NA	Negative	30.13	Negative	NA	Negative	NA	Negative	28.55	Negative	NA	Negative	11.485	Positive	NA	Negative	NA	Negative	21.765	Positive	27.88	Maybe	23.09	Positive	NA	Negative	NA	Negative	NA	NonDetect	28.27
605	N112111	2015-11-21 05:30:00+00:00	2015-11-22 01:30:10+00:00	Netrakona	Kailati	Battala	NA	Negative	NA	Negative	NA	Negative	NA	Negative	NA	Negative	NA	Negative	NA	Negative	NA	Negative	NA	Negative	NA	Negative	32.67	Negative	NA	Negative	11.47	Positive	NA	Negative	NA	Negative	NA	Negative	NA	Negative	25.4	Positive	NA	Negative	NA	Negative	NA	NonDetect	NA
606	N112112	2015-11-21 06:15:28+00:00	2015-11-23 05:00:10+00:00	Netrakona	Rauha	Teliganti	NA	Negative	NA	Negative	NA	Negative	NA	Negative	NA	Negative	NA	Negative	NA	Negative	NA	Negative	NA	Negative	NA	Negative	NA	Negative	NA	Negative	19.415	Positive	NA	Negative	NA	Negative	NA	Negative	NA	Negative	NA	Negative	NA	Negative	NA	Negative	NA	NonDetect	31.855
607	N112113	2015-11-20 18:25:51+00:00	2015-11-22 05:00:32+00:00	Netrakona	Kailati	Kandi	NA	NA	NA	NA	NA	NA	NA	NA	NA	NA	NA	NA	NA	NA	NA	NA	NA	NA	NA	NA	NA	NA	NA	NA	NA	NA	NA	NA	NA	NA	NA	NA	NA	NA	NA	NA	NA	NA	NA	NA	NA	NA	NA
608	N112114	2015-11-21 06:46:48+00:00	2015-11-22 05:00:58+00:00	Netrakona	Roypur	Dudhkora	NA	Negative	NA	Negative	NA	Negative	NA	Negative	NA	Negative	NA	Negative	NA	Negative	NA	Negative	NA	Negative	NA	Negative	NA	Negative	NA	Negative	21.685	Positive	NA	Negative	NA	Negative	NA	Negative	NA	Negative	NA	Negative	NA	Negative	NA	Negative	NA	NonDetect	NA
609	N112116	2015-11-21 07:20:01+00:00	2015-11-23 06:00:12+00:00	Netrakona	Kailati	Kandi	NA	Negative	NA	Negative	NA	Negative	NA	Negative	NA	Negative	NA	Negative	NA	Negative	NA	Negative	NA	Negative	NA	Negative	NA	Negative	NA	Negative	26.51	Maybe	NA	Negative	NA	Negative	NA	Negative	28.17	Negative	NA	Negative	NA	Negative	NA	Negative	NA	NonDetect	NA
610	N112117	2015-11-21 07:20:41+00:00	2015-11-23 05:10:51+00:00	Netrakona	Madanpur	Sajiura	NA	Negative	NA	Negative	NA	Negative	NA	Negative	NA	Negative	NA	Negative	31.08	Negative	NA	Negative	NA	Negative	NA	Negative	NA	Negative	NA	Negative	22.285	Positive	NA	Negative	NA	Negative	NA	Negative	NA	Negative	NA	Negative	NA	Negative	NA	Negative	NA	NonDetect	NA
611	N112118	2015-11-21 11:00:49+00:00	2015-11-22 06:30:02+00:00	Netrakona	Kaliara Gabragat	Patali	NA	Negative	26.25	Maybe	NA	Negative	NA	Negative	32.325	Negative	NA	Negative	NA	Negative	25.95	Positive	NA	Negative	NA	Negative	21	Positive	NA	Negative	11.555	Positive	NA	Negative	NA	Negative	27.925	Maybe	32.06	Negative	29.32	Negative	25.405	Positive	NA	Negative	NA	NonDetect	32.4
612	N112120	2015-11-21 14:00:17+00:00	2015-11-23 04:50:18+00:00	Netrakona	Dakshin Bishiura	Dakshin Bishiura	NA	Negative	NA	Negative	NA	Negative	NA	Negative	NA	Negative	21.2	Positive	NA	Negative	25.945	Positive	NA	Negative	NA	Negative	27.22	Maybe	NA	Negative	7.48	Positive	34.97	Negative	NA	Negative	28.81	Negative	19.415	Positive	NA	Negative	NA	Negative	NA	Negative	NA	NonDetect	NA
613	N112121	2015-11-21 15:40:23+00:00	2015-11-23 05:10:38+00:00	Netrakona	Challisha	Challisha	NA	Negative	NA	Negative	NA	Negative	NA	Negative	26.425	Maybe	26.12	Maybe	30.05	Negative	NA	Negative	NA	Negative	NA	Negative	NA	Negative	NA	Negative	15.1	Positive	NA	Negative	NA	Negative	28.455	Negative	25.25	Positive	NA	Negative	NA	Negative	19.7	Positive	NA	NonDetect	27.555
614	N112201	2015-11-21 18:23:19+00:00	2015-11-22 05:30:49+00:00	Netrakona	Lakshmiganj	Atka Para	NA	Negative	NA	Negative	NA	Negative	NA	Negative	28.9	Negative	NA	Negative	NA	Negative	NA	Negative	NA	Negative	NA	Negative	28.805	Negative	NA	Negative	11.4	Positive	34.38	Negative	NA	Negative	NA	Negative	29.38	Negative	NA	Negative	NA	Negative	24.67	Positive	NA	NonDetect	29.285
615	N112202	2015-11-21 21:19:11+00:00	2015-11-23 05:00:11+00:00	Netrakona	Dakshin Bishiura	Dakshin Bishiura	24.22	Positive	NA	Negative	NA	Negative	NA	Negative	NA	Negative	NA	Negative	30.69	Negative	NA	Negative	NA	Negative	NA	Negative	32.17	Negative	NA	Negative	16.255	Positive	NA	Negative	NA	Negative	NA	Negative	NA	Negative	NA	Negative	NA	Negative	NA	Negative	NA	NonDetect	29.97
616	N112203	2015-11-22 04:00:38+00:00	2015-11-22 05:00:04+00:00	Netrakona	Challisha	Challisha	NA	Negative	NA	Negative	NA	Negative	NA	Negative	NA	Negative	NA	Negative	NA	Negative	NA	Negative	NA	Negative	NA	Negative	34.15	Negative	NA	Negative	14.245	Positive	NA	Negative	NA	Negative	NA	Negative	NA	Negative	28.155	Negative	NA	Negative	33.22	Negative	NA	NonDetect	29.605
617	N112204	2015-11-22 05:53:17+00:00	2015-11-23 05:00:25+00:00	Netrakona	Ward No-09	Kurpar	NA	NA	NA	NA	NA	NA	NA	NA	NA	NA	NA	NA	NA	NA	NA	NA	NA	NA	NA	NA	NA	NA	NA	NA	NA	NA	NA	NA	NA	NA	NA	NA	NA	NA	NA	NA	NA	NA	NA	NA	NA	NA	NA
618	N112205	2015-11-22 02:25:05+00:00	2015-11-23 04:20:10+00:00	Netrakona	Lakshmiganj	Boyraura	NA	Negative	NA	Negative	NA	Negative	NA	Negative	NA	Negative	NA	Negative	NA	Negative	NA	Negative	NA	Negative	NA	Negative	NA	Negative	NA	Negative	24.895	Positive	NA	Negative	NA	Negative	NA	Negative	NA	Negative	NA	Negative	NA	Negative	NA	Negative	NA	NonDetect	NA
619	N112206	2015-11-22 04:05:42+00:00	2015-11-23 05:00:22+00:00	Netrakona	Ward No-03	Chak Para Purba	NA	NA	NA	NA	NA	NA	NA	NA	NA	NA	NA	NA	NA	NA	NA	NA	NA	NA	NA	NA	NA	NA	NA	NA	NA	NA	NA	NA	NA	NA	NA	NA	NA	NA	NA	NA	NA	NA	NA	NA	NA	NA	NA
620	N112207	2015-11-22 03:30:59+00:00	2015-11-23 05:05:33+00:00	Netrakona	Madanpur	Lakshmipur	NA	Negative	NA	Negative	NA	Negative	NA	Negative	25.82	Positive	NA	Negative	NA	Negative	NA	Negative	NA	Negative	NA	Negative	NA	Negative	NA	Negative	15.3	Positive	NA	Negative	NA	Negative	NA	Negative	NA	Negative	21.94	Positive	NA	Negative	15.965	Positive	NA	NonDetect	27.505
621	N112208	2015-11-22 04:00:05+00:00	2015-11-23 04:49:54+00:00	Netrakona	Maugati	Jamati Purbadahar	NA	Negative	NA	Negative	NA	Negative	NA	Negative	28.9	Negative	NA	Negative	NA	Negative	NA	Negative	NA	Negative	NA	Negative	32.68	Negative	27.56	Maybe	11.725	Positive	NA	Negative	27.44	Maybe	26.695	Maybe	28.9	Negative	NA	Negative	NA	Negative	27.78	Maybe	16.6	Positive	29.78
622	N112209	2015-11-22 16:10:29+00:00	2015-11-23 04:39:40+00:00	Netrakona	Ward No-07	Joynagar	NA	Negative	NA	Negative	NA	Negative	NA	Negative	32.955	Negative	NA	Negative	NA	Negative	NA	Negative	NA	Negative	NA	Negative	NA	Negative	NA	Negative	17.33	Positive	NA	Negative	NA	Negative	NA	Negative	NA	Negative	29.33	Negative	NA	Negative	28.36	Negative	NA	NonDetect	NA
623	N112211	2015-11-22 04:15:37+00:00	2015-11-23 05:00:00+00:00	Netrakona	Madanpur	Lakshmipur	NA	Negative	NA	Negative	25.41	Positive	NA	Negative	NA	Negative	25.205	Positive	31.1	Negative	25.245	Positive	NA	Negative	NA	Negative	NA	Negative	NA	Negative	14.99	Positive	NA	Negative	NA	Negative	NA	Negative	NA	Negative	22.625	Positive	NA	Negative	17.32	Positive	NA	NonDetect	27.2
624	N112212	2015-11-21 22:52:19+00:00	2015-11-24 05:30:52+00:00	Netrakona	Dakshin Bishiura	Mahisati	NA	Negative	NA	Negative	NA	Negative	NA	Negative	28.675	Negative	NA	Negative	NA	Negative	NA	Negative	NA	Negative	NA	Negative	31.8	Negative	NA	Negative	14.945	Positive	NA	Negative	NA	Negative	NA	Negative	27.86	Maybe	27.95	Maybe	NA	Negative	23.585	Positive	NA	NonDetect	30.58
625	N112213	2015-11-22 08:20:11+00:00	2015-11-23 05:00:56+00:00	Netrakona	Ward No-07	Joynagar	NA	NA	NA	NA	NA	NA	NA	NA	NA	NA	NA	NA	NA	NA	NA	NA	NA	NA	NA	NA	NA	NA	NA	NA	NA	NA	NA	NA	NA	NA	NA	NA	NA	NA	NA	NA	NA	NA	NA	NA	NA	NA	NA
626	N112214	2015-11-22 08:30:23+00:00	2015-11-23 12:00:59+00:00	Netrakona	Dakshin Bishiura	Kamardhar	NA	Negative	NA	Negative	NA	Negative	NA	Negative	NA	Negative	NA	Negative	31.22	Negative	NA	Negative	33.97	Negative	NA	Negative	NA	Negative	NA	Negative	20.885	Positive	NA	Negative	NA	Negative	NA	Negative	NA	Negative	NA	Negative	NA	Negative	28.52	Negative	NA	NonDetect	33.84
627	N112215	2015-11-22 11:30:55+00:00	2015-11-24 04:55:24+00:00	Netrakona	Challisha	Rajendrapur	NA	Negative	NA	Negative	NA	Negative	NA	Negative	NA	Negative	NA	Negative	NA	Negative	NA	Negative	NA	Negative	NA	Negative	NA	Negative	27.34	Maybe	17.85	Positive	NA	Negative	NA	Negative	NA	Negative	29.65	Negative	NA	Negative	NA	Negative	28.96	Negative	NA	NonDetect	29.56
628	N112216	2015-11-22 11:30:08+00:00	2015-11-23 10:00:34+00:00	Netrakona	Amtala	Panch Kahania	NA	Negative	NA	Negative	NA	Negative	NA	Negative	31.335	Negative	27.14	Maybe	30.63	Negative	NA	Negative	NA	Negative	NA	Negative	28.31	Negative	NA	Negative	9.63	Positive	NA	Negative	27.03	Maybe	NA	Negative	28.78	Negative	NA	Negative	NA	Negative	NA	Negative	14.665	Positive	28.43
629	N112301	2015-11-22 23:27:55+00:00	2015-11-25 05:00:00+00:00	Netrakona	Lakshmiganj	Lakshmiganj	NA	Negative	NA	Negative	NA	Negative	NA	Negative	29.955	Negative	21.635	Positive	NA	Negative	NA	Negative	NA	Negative	NA	Negative	NA	Negative	NA	Negative	17.32	Positive	NA	Negative	NA	Negative	NA	Negative	28.065	Negative	28.11	Negative	NA	Negative	NA	Negative	NA	NonDetect	31.535
630	N112302	2015-11-23 00:40:41+00:00	2015-11-25 13:30:47+00:00	Netrakona	Barhatta	Bari	NA	Negative	NA	Negative	NA	Negative	NA	Negative	NA	Negative	NA	Negative	NA	Negative	31.435	Negative	NA	Negative	NA	Negative	NA	Negative	NA	Negative	9.12	Positive	NA	Negative	NA	Negative	NA	Negative	29.775	Negative	25.02	Positive	NA	Negative	25.915	Positive	NA	NonDetect	29.78
631	N112303	2015-11-23 03:05:21+00:00	2015-11-24 05:00:26+00:00	Netrakona	Kailati	Arbatabad (Arrongabad)	NA	Negative	32.77	Negative	NA	Negative	NA	Negative	28.08	Negative	NA	Negative	NA	Negative	34.015	Negative	NA	Negative	NA	Negative	29.215	Negative	NA	Negative	8.59	Positive	NA	Negative	NA	Negative	NA	Negative	34.98	Negative	26.1	Maybe	NA	Negative	29.73	Negative	NA	NonDetect	30.66
632	N112304	2015-11-23 03:35:47+00:00	2015-11-23 06:30:06+00:00	Netrakona	Amtala	Char Para	NA	NA	NA	NA	NA	NA	NA	NA	NA	NA	NA	NA	NA	NA	NA	NA	NA	NA	NA	NA	NA	NA	NA	NA	NA	NA	NA	NA	NA	NA	NA	NA	NA	NA	NA	NA	NA	NA	NA	NA	NA	NA	NA
633	N112305	2015-11-23 04:40:54+00:00	2015-11-24 05:00:53+00:00	Netrakona	Kailati	Anantapur	26.195	Maybe	NA	Negative	NA	Negative	NA	Negative	27.49	Maybe	28.3	Negative	28.93	Negative	26.21	Maybe	NA	Negative	NA	Negative	29.93	Negative	NA	Negative	11.92	Positive	NA	Negative	NA	Negative	NA	Negative	NA	Negative	NA	Negative	NA	Negative	NA	Negative	NA	NonDetect	NA
634	N112306	2015-11-23 05:00:07+00:00	2015-11-24 06:20:33+00:00	Netrakona	Medni	Kayrahati	NA	Negative	NA	Negative	NA	Negative	NA	Negative	NA	Negative	NA	Negative	NA	Negative	27.27	Maybe	NA	Negative	NA	Negative	28.21	Negative	NA	Negative	9.63	Positive	NA	Negative	NA	Negative	NA	Negative	32.475	Negative	NA	Negative	NA	Negative	30.485	Negative	NA	NonDetect	30.33
635	N112307	2015-11-23 05:30:10+00:00	2015-11-24 15:50:54+00:00	Netrakona	Ward No-09	Kurpar	NA	Negative	NA	Negative	NA	Negative	NA	Negative	NA	Negative	NA	Negative	NA	Negative	NA	Negative	NA	Negative	NA	Negative	33.23	Negative	NA	Negative	20.145	Positive	NA	Negative	NA	Negative	NA	Negative	NA	Negative	NA	Negative	NA	Negative	NA	Negative	NA	NonDetect	33.11
636	N112308	2015-11-23 08:25:54+00:00	2015-11-25 05:05:21+00:00	Netrakona	Ward No-03	Pukuria	NA	Negative	NA	Negative	NA	Negative	NA	Negative	NA	Negative	NA	Negative	NA	Negative	NA	Negative	NA	Negative	NA	Negative	NA	Negative	NA	Negative	13.035	Positive	NA	Negative	NA	Negative	NA	Negative	NA	Negative	NA	Negative	NA	Negative	34.52	Negative	NA	NonDetect	33.49
637	N112309	2015-11-23 08:30:27+00:00	2015-11-25 05:00:48+00:00	Netrakona	Hogla	Chalit Dahar	NA	Negative	NA	Negative	NA	Negative	NA	Negative	NA	Negative	NA	Negative	NA	Negative	NA	Negative	NA	Negative	NA	Negative	NA	Negative	NA	Negative	19.74	Positive	NA	Negative	NA	Negative	NA	Negative	NA	Negative	NA	Negative	NA	Negative	26.125	Maybe	NA	NonDetect	30.87
638	N112310	2015-11-23 09:00:39+00:00	2015-11-24 04:50:02+00:00	Netrakona	Samaj Sahildeo	Kayra Para	NA	Negative	NA	Negative	NA	Negative	NA	Negative	32.375	Negative	28.4	Negative	NA	Negative	NA	Negative	NA	Negative	NA	Negative	34.68	Negative	NA	Negative	14.79	Positive	NA	Negative	NA	Negative	NA	Negative	NA	Negative	NA	Negative	NA	Negative	18.51	Positive	NA	NonDetect	28.38
639	N112311	2015-11-23 10:00:51+00:00	2015-11-24 13:30:31+00:00	Netrakona	Singhar Bangla	Gobindapur	NA	Negative	NA	Negative	NA	Negative	NA	Negative	NA	Negative	NA	Negative	NA	Negative	NA	Negative	NA	Negative	NA	Negative	NA	Negative	NA	Negative	22.62	Positive	NA	Negative	NA	Negative	NA	Negative	NA	Negative	NA	Negative	NA	Negative	23.32	Positive	NA	NonDetect	28.915
640	N112312	2015-11-23 10:50:50+00:00	2015-11-24 13:30:52+00:00	Netrakona	Challisha	Sanura	NA	Negative	NA	Negative	NA	Negative	NA	Negative	30.535	Negative	NA	Negative	NA	Negative	NA	Negative	NA	Negative	NA	Negative	NA	Negative	NA	Negative	18.455	Positive	NA	Negative	NA	Negative	NA	Negative	NA	Negative	NA	Negative	NA	Negative	NA	Negative	NA	NonDetect	NA
641	N112313	2015-11-23 12:25:44+00:00	2015-11-24 05:00:55+00:00	Netrakona	Lakshmiganj	Oail Para	20.12	Positive	NA	Negative	NA	Negative	NA	Negative	33.715	Negative	NA	Negative	28.83	Negative	NA	Negative	NA	Negative	NA	Negative	33.81	Negative	NA	Negative	8.445	Positive	NA	Negative	NA	Negative	NA	Negative	NA	Negative	NA	Negative	NA	Negative	NA	Negative	NA	NonDetect	27.86
642	N112315	2015-11-23 15:20:50+00:00	2015-11-24 05:50:41+00:00	Netrakona	Baushi	Shasanura	NA	Negative	NA	Negative	NA	Negative	NA	Negative	NA	Negative	NA	Negative	30.19	Negative	NA	Negative	NA	Negative	NA	Negative	31.71	Negative	NA	Negative	11.36	Positive	NA	Negative	NA	Negative	NA	Negative	30.29	Negative	NA	Negative	NA	Negative	NA	Negative	NA	NonDetect	NA
643	N112316	2015-11-23 15:00:58+00:00	2015-11-24 04:50:03+00:00	Netrakona	Challisha	Lait	NA	Negative	NA	Negative	NA	Negative	NA	Negative	NA	Negative	NA	Negative	26.26	Maybe	NA	Negative	NA	Negative	NA	Negative	NA	Negative	NA	Negative	18.905	Positive	32.32	Negative	NA	Negative	NA	Negative	22.915	Positive	NA	Negative	NA	Negative	NA	Negative	NA	NonDetect	30.97
644	N112317	2015-11-23 15:50:11+00:00	2015-11-24 06:30:25+00:00	Netrakona	Kailati	Bara Kailati	NA	Negative	NA	Negative	NA	Negative	NA	Negative	33.985	Negative	NA	Negative	NA	Negative	NA	Negative	NA	Negative	NA	Negative	NA	Negative	NA	Negative	16.775	Positive	NA	Negative	NA	Negative	NA	Negative	NA	Negative	26.665	Maybe	NA	Negative	NA	Negative	NA	NonDetect	NA
645	N112318	2015-11-23 16:20:20+00:00	2015-11-25 05:30:02+00:00	Netrakona	Rauha	Baje Amli	NA	Negative	NA	Negative	NA	Negative	NA	Negative	NA	Negative	NA	Negative	NA	Negative	NA	Negative	NA	Negative	NA	Negative	NA	Negative	NA	Negative	25.445	Positive	NA	Negative	NA	Negative	NA	Negative	NA	Negative	NA	Negative	NA	Negative	NA	Negative	NA	NonDetect	NA
646	N112319	2015-11-23 16:25:19+00:00	2015-11-25 05:01:49+00:00	Netrakona	Amtala	Swalpa Dugia	NA	Negative	NA	Negative	NA	Negative	NA	Negative	NA	Negative	NA	Negative	NA	Negative	NA	Negative	NA	Negative	NA	Negative	NA	Negative	NA	Negative	19.795	Positive	NA	Negative	NA	Negative	NA	Negative	NA	Negative	NA	Negative	NA	Negative	25.505	Positive	NA	NonDetect	29.685
647	N112401	2015-11-24 01:40:18+00:00	2015-11-25 00:00:57+00:00	Netrakona	Ward No-07	Mukter Para	NA	Negative	NA	Negative	NA	Negative	NA	Negative	30.685	Negative	NA	Negative	NA	Negative	NA	Negative	NA	Negative	NA	Negative	NA	Negative	NA	Negative	14.975	Positive	NA	Negative	NA	Negative	NA	Negative	28.12	Negative	NA	Negative	NA	Negative	NA	Negative	NA	NonDetect	NA
648	N112402	2015-11-24 02:00:31+00:00	2015-11-25 05:00:31+00:00	Netrakona	Singhar Bangla	Kona Para	NA	NA	NA	NA	NA	NA	NA	NA	NA	NA	NA	NA	NA	NA	NA	NA	NA	NA	NA	NA	NA	NA	NA	NA	NA	NA	NA	NA	NA	NA	NA	NA	NA	NA	NA	NA	NA	NA	NA	NA	NA	NA	NA
649	N112403	2015-11-24 03:42:57+00:00	2015-11-25 05:25:13+00:00	Netrakona	Rauha	Kumri	NA	Negative	NA	Negative	NA	Negative	NA	Negative	NA	Negative	NA	Negative	NA	Negative	NA	Negative	NA	Negative	NA	Negative	NA	Negative	NA	Negative	14.305	Positive	NA	Negative	NA	Negative	NA	Negative	NA	Negative	NA	Negative	NA	Negative	NA	Negative	NA	NonDetect	33.56
650	N112404	2015-11-24 03:30:48+00:00	2015-11-26 05:30:24+00:00	Netrakona	Maugati	Kanchanpur	NA	Negative	NA	Negative	NA	Negative	NA	Negative	NA	Negative	NA	Negative	NA	Negative	32.85	Negative	NA	Negative	NA	Negative	NA	Negative	NA	Negative	19.665	Positive	NA	Negative	NA	Negative	NA	Negative	27.24	Maybe	NA	Negative	NA	Negative	NA	Negative	NA	NonDetect	NA
651	N112405	2015-11-24 05:00:33+00:00	2015-11-25 05:00:01+00:00	Netrakona	Madanpur	Nandipur	NA	Negative	NA	Negative	NA	Negative	NA	Negative	NA	Negative	NA	Negative	NA	Negative	NA	Negative	NA	Negative	NA	Negative	31.89	Negative	NA	Negative	23.6	Positive	NA	Negative	NA	Negative	NA	Negative	NA	Negative	NA	Negative	NA	Negative	29.56	Negative	NA	NonDetect	NA
652	N112406	2015-11-24 06:30:23+00:00	2015-11-25 05:05:42+00:00	Netrakona	Medni	Bhatli Bhita	NA	Negative	NA	Negative	NA	Negative	NA	Negative	NA	Negative	25.35	Positive	NA	Negative	NA	Negative	NA	Negative	NA	Negative	NA	Negative	NA	Negative	18.28	Positive	NA	Negative	NA	Negative	NA	Negative	NA	Negative	NA	Negative	NA	Negative	28.57	Negative	NA	NonDetect	33.33
653	N112407	2015-11-24 06:50:25+00:00	2015-11-25 05:10:13+00:00	Netrakona	Ward No-06	Paschim Jahangirpur	NA	Negative	NA	Negative	NA	Negative	NA	Negative	NA	Negative	NA	Negative	NA	Negative	NA	Negative	NA	Negative	NA	Negative	34.34	Negative	NA	Negative	19.995	Positive	NA	Negative	NA	Negative	NA	Negative	28.44	Negative	27.79	Maybe	NA	Negative	34.42	Negative	NA	NonDetect	NA
654	N112408	2015-11-24 07:00:01+00:00	2015-11-25 05:30:52+00:00	Netrakona	Garadoba	Baraigaon	NA	Negative	NA	Negative	NA	Negative	NA	Negative	NA	Negative	NA	Negative	NA	Negative	31.565	Negative	NA	Negative	NA	Negative	29.12	Negative	NA	Negative	10.16	Positive	NA	Negative	NA	Negative	NA	Negative	32.83	Negative	15.63	Positive	24.215	Positive	34.64	Negative	NA	NonDetect	32.28
655	N112409	2015-11-24 10:15:56+00:00	2015-11-25 05:00:16+00:00	Netrakona	Challisha	Mymensingh Jhausi	NA	NA	NA	NA	NA	NA	NA	NA	NA	NA	NA	NA	NA	NA	NA	NA	NA	NA	NA	NA	NA	NA	NA	NA	NA	NA	NA	NA	NA	NA	NA	NA	NA	NA	NA	NA	NA	NA	NA	NA	NA	NA	NA
656	N112410	2015-11-24 11:45:33+00:00	2015-11-25 05:50:08+00:00	Netrakona	Ward No-05	Malni	NA	Negative	NA	Negative	NA	Negative	NA	Negative	NA	Negative	NA	Negative	28.63	Negative	31.745	Negative	NA	Negative	NA	Negative	28.61	Negative	NA	Negative	10.2	Positive	NA	Negative	NA	Negative	NA	Negative	31.11	Negative	NA	Negative	23.565	Positive	28.22	Negative	NA	NonDetect	32.375
657	N112411	2015-11-24 12:40:21+00:00	2015-11-26 05:10:04+00:00	Netrakona	Dalpa	Kunihati	NA	Negative	NA	Negative	NA	Negative	NA	Negative	NA	Negative	26.385	Maybe	NA	Negative	26.26	Maybe	NA	Negative	NA	Negative	29.15	Negative	NA	Negative	9.135	Positive	NA	Negative	NA	Negative	NA	Negative	30.405	Negative	16.52	Positive	18.29	Positive	NA	Negative	NA	NonDetect	28.51
658	N112412	2015-11-24 14:40:31+00:00	2015-11-26 06:00:38+00:00	Netrakona	Ward No-09	Kurpar	NA	Negative	NA	Negative	NA	Negative	NA	Negative	28.965	Negative	NA	Negative	NA	Negative	NA	Negative	NA	Negative	NA	Negative	NA	Negative	NA	Negative	14.94	Positive	NA	Negative	NA	Negative	NA	Negative	NA	Negative	NA	Negative	NA	Negative	NA	Negative	NA	NonDetect	31.64
659	N112413	2015-11-24 02:45:05+00:00	2015-11-26 06:10:24+00:00	Netrakona	Ward No-04	New Town Bilpar	NA	Negative	NA	Negative	NA	Negative	NA	Negative	NA	Negative	NA	Negative	NA	Negative	NA	Negative	NA	Negative	NA	Negative	NA	Negative	NA	Negative	10.24	Positive	NA	Negative	NA	Negative	NA	Negative	29.13	Negative	NA	Negative	NA	Negative	NA	Negative	NA	NonDetect	31.09
660	N112414	2015-11-24 17:00:39+00:00	2015-11-25 05:30:16+00:00	Netrakona	Ward No-03	Mahendarapur	NA	Negative	NA	Negative	NA	Negative	NA	Negative	30.815	Negative	NA	Negative	NA	Negative	NA	Negative	NA	Negative	NA	Negative	32.68	Negative	NA	Negative	11.47	Positive	NA	Negative	NA	Negative	NA	Negative	NA	Negative	28.3	Negative	NA	Negative	NA	Negative	NA	NonDetect	33.14
661	N112415	2015-11-24 17:10:02+00:00	2015-11-26 05:00:45+00:00	Netrakona	Rauha	Amli Keshabpur	NA	Negative	NA	Negative	NA	Negative	NA	Negative	33.435	Negative	NA	Negative	NA	Negative	NA	Negative	NA	Negative	NA	Negative	28.19	Negative	NA	Negative	16.05	Positive	NA	Negative	NA	Negative	NA	Negative	NA	Negative	21.215	Positive	NA	Negative	25.97	Positive	NA	NonDetect	NA
662	N112501	2015-11-24 19:35:29+00:00	2015-11-27 13:00:12+00:00	Netrakona	Ward No-01	Choagara	NA	NA	NA	NA	NA	NA	NA	NA	NA	NA	NA	NA	NA	NA	NA	NA	NA	NA	NA	NA	NA	NA	NA	NA	NA	NA	NA	NA	NA	NA	NA	NA	NA	NA	NA	NA	NA	NA	NA	NA	NA	NA	NA
663	N112502	2015-11-25 01:30:08+00:00	2015-11-26 05:10:53+00:00	Netrakona	Narandia	Baulam	NA	Negative	NA	Negative	NA	Negative	NA	Negative	26.08	Maybe	NA	Negative	28.95	Negative	29.865	Negative	NA	Negative	NA	Negative	32.11	Negative	NA	Negative	12.135	Positive	NA	Negative	NA	Negative	NA	Negative	NA	Negative	17.82	Positive	NA	Negative	27.635	Maybe	NA	NonDetect	33.09
664	N112503	2015-11-25 01:55:37+00:00	2015-11-26 05:45:18+00:00	Netrakona	Ward No-07	Katly	NA	NA	NA	NA	NA	NA	NA	NA	NA	NA	NA	NA	NA	NA	NA	NA	NA	NA	NA	NA	NA	NA	NA	NA	NA	NA	NA	NA	NA	NA	NA	NA	NA	NA	NA	NA	NA	NA	NA	NA	NA	NA	NA
665	N112504	2015-11-25 03:45:12+00:00	2015-11-27 01:00:36+00:00	Netrakona	Ward No-07	Katly	NA	NA	NA	NA	NA	NA	NA	NA	NA	NA	NA	NA	NA	NA	NA	NA	NA	NA	NA	NA	NA	NA	NA	NA	NA	NA	NA	NA	NA	NA	NA	NA	NA	NA	NA	NA	NA	NA	NA	NA	NA	NA	NA
666	N112505	2015-11-25 05:10:38+00:00	2015-11-26 05:25:48+00:00	Netrakona	Ward No-02	Satpai Town	NA	Negative	NA	Negative	26.14	Maybe	NA	Negative	31.325	Negative	27.07	Maybe	NA	Negative	NA	Negative	NA	Negative	NA	Negative	34.705	Negative	NA	Negative	14.59	Positive	NA	Negative	NA	Negative	NA	Negative	NA	Negative	NA	Negative	NA	Negative	NA	Negative	NA	NonDetect	NA
667	N112507	2015-11-25 04:50:32+00:00	2015-11-28 02:00:55+00:00	Netrakona	Maugati	Chuchua	NA	Negative	NA	Negative	NA	Negative	NA	Negative	30.325	Negative	NA	Negative	NA	Negative	NA	Negative	NA	Negative	NA	Negative	33.34	Negative	NA	Negative	15.77	Positive	NA	Negative	NA	Negative	NA	Negative	NA	Negative	21.25	Positive	NA	Negative	34.89	Negative	NA	NonDetect	31.76
668	N112508	2015-11-25 05:45:20+00:00	2015-11-26 09:00:51+00:00	Netrakona	Lakshmiganj	Boyraura	NA	Negative	NA	Negative	NA	Negative	NA	Negative	28.935	Negative	NA	Negative	NA	Negative	NA	Negative	NA	Negative	NA	Negative	NA	Negative	NA	Negative	16.11	Positive	NA	Negative	29.18	Negative	NA	Negative	NA	Negative	28.92	Negative	NA	Negative	NA	Negative	NA	NonDetect	30.88
669	N112509	2015-11-25 05:45:53+00:00	2015-11-28 04:30:15+00:00	Netrakona	Ward No-06	Mathar Patty	26.51	Maybe	NA	Negative	NA	Negative	NA	Negative	27.525	Maybe	NA	Negative	NA	Negative	NA	Negative	NA	Negative	NA	Negative	NA	Negative	NA	Negative	13.605	Positive	NA	Negative	NA	Negative	NA	Negative	NA	Negative	23.795	Positive	NA	Negative	NA	Negative	NA	NonDetect	28.625
670	N112510	2015-11-25 06:25:25+00:00	2015-11-27 13:00:43+00:00	Netrakona	Sarmaisa	Desiura	NA	Negative	NA	Negative	NA	Negative	NA	Negative	31.315	Negative	NA	Negative	34.36	Negative	30.075	Negative	NA	Negative	NA	Negative	NA	Negative	NA	Negative	10.51	Positive	NA	Negative	NA	Negative	NA	Negative	NA	Negative	NA	Negative	NA	Negative	NA	Negative	NA	NonDetect	NA
671	N112511	2015-11-24 18:15:11+00:00	2015-11-28 15:00:25+00:00	Netrakona	Rauha	Bara Gara	NA	Negative	NA	Negative	NA	Negative	NA	Negative	27.095	Maybe	20.765	Positive	NA	Negative	NA	Negative	NA	Negative	NA	Negative	NA	Negative	NA	Negative	9.715	Positive	NA	Negative	28.56	Negative	26.785	Maybe	25.375	Positive	32.035	Negative	NA	Negative	19.005	Positive	33.78	Negative	21.685
672	N112512	2015-11-25 06:35:52+00:00	2015-11-28 05:10:47+00:00	Netrakona	Khalishaur	Langaljora	22.285	Positive	NA	Negative	NA	Negative	NA	Negative	NA	Negative	NA	Negative	NA	Negative	NA	Negative	NA	Negative	NA	Negative	NA	Negative	NA	Negative	13.845	Positive	NA	Negative	28.25	Negative	28.13	Negative	NA	Negative	NA	Negative	NA	Negative	NA	Negative	NA	NonDetect	28.34
673	N112513	2015-11-25 06:40:35+00:00	2015-11-26 05:20:56+00:00	Netrakona	Thakurakona	Thakurakona	NA	Negative	NA	Negative	NA	Negative	NA	Negative	30.025	Negative	19.25	Positive	28.47	Negative	32.74	Negative	NA	Negative	NA	Negative	30.15	Negative	NA	Negative	12.605	Positive	NA	Negative	NA	Negative	NA	Negative	NA	Negative	NA	Negative	NA	Negative	NA	Negative	NA	NonDetect	33.28
674	N112515	2015-11-25 09:00:42+00:00	2015-11-26 14:00:43+00:00	Netrakona	Sonai	Swalpa Sonai	NA	Negative	NA	Negative	NA	Negative	NA	Negative	24.335	Positive	27.95	Maybe	26.775	Maybe	34.22	Negative	NA	Negative	NA	Negative	31.64	Negative	NA	Negative	10.16	Positive	NA	Negative	NA	Negative	NA	Negative	NA	Negative	19.53	Positive	NA	Negative	26.655	Maybe	NA	NonDetect	30.925
675	N112516	2015-11-25 10:05:02+00:00	2015-11-26 05:00:15+00:00	Netrakona	Maugati	Jamati	NA	Negative	NA	Negative	NA	Negative	NA	Negative	NA	Negative	NA	Negative	27.12	Maybe	NA	Negative	NA	Negative	NA	Negative	NA	Negative	29.115	Negative	19.35	Positive	NA	Negative	NA	Negative	NA	Negative	NA	Negative	NA	Negative	NA	Negative	NA	Negative	24	Positive	NA
676	N112517	2015-11-24 23:05:46+00:00	2015-11-26 05:00:16+00:00	Netrakona	Ward No-07	Katly	27.14	Maybe	NA	Negative	NA	Negative	NA	Negative	23.31	Positive	NA	Negative	NA	Negative	26.815	Maybe	NA	Negative	NA	Negative	29.41	Negative	NA	Negative	11.1	Positive	NA	Negative	28.81	Negative	24.95	Positive	23.02	Positive	NA	Negative	NA	Negative	NA	Negative	NA	NonDetect	26.045
677	N112518	2015-11-24 23:35:00+00:00	2015-11-26 05:10:35+00:00	Netrakona	Ward No-03	Pukuria	NA	Negative	28.085	Negative	28.14	Negative	NA	Negative	27.845	Maybe	28.45	Negative	27.87	Maybe	NA	Negative	NA	Negative	NA	Negative	29.545	Negative	NA	Negative	12.3	Positive	NA	Negative	NA	Negative	18.5	Positive	18.315	Positive	20.97	Positive	NA	Negative	24.6	Positive	27.58	Maybe	30.76
678	N112519	2015-11-25 13:04:56+00:00	2015-11-28 05:00:30+00:00	Netrakona	Ward No-02	Satpai Town	NA	Negative	NA	Negative	NA	Negative	NA	Negative	NA	Negative	NA	Negative	NA	Negative	NA	Negative	NA	Negative	NA	Negative	30.39	Negative	NA	Negative	11	Positive	NA	Negative	NA	Negative	26.41	Maybe	25.54	Positive	NA	Negative	NA	Negative	NA	Negative	21.01	Positive	31.58
679	N112520	2015-11-25 13:44:28+00:00	2015-11-26 05:00:23+00:00	Netrakona	Medni	Medni	NA	Negative	NA	Negative	NA	Negative	NA	Negative	29.035	Negative	NA	Negative	NA	Negative	33.185	Negative	NA	Negative	NA	Negative	NA	Negative	NA	Negative	16.06	Positive	NA	Negative	NA	Negative	NA	Negative	NA	Negative	NA	Negative	NA	Negative	NA	Negative	NA	NonDetect	33.99
680	N112521	2015-11-25 02:30:08+00:00	2015-11-26 05:47:35+00:00	Netrakona	Baushi	Baushi	NA	Negative	25.33	Positive	NA	Negative	NA	Negative	27.455	Maybe	24.455	Positive	NA	Negative	31.05	Negative	NA	Negative	NA	Negative	NA	Negative	NA	Negative	13.16	Positive	NA	Negative	NA	Negative	16.675	Positive	16.39	Positive	23.565	Positive	27.975	Maybe	21.95	Positive	NA	NonDetect	29.82
681	N112522	2015-11-25 16:00:22+00:00	2015-11-26 05:30:01+00:00	Netrakona	Ward No-09	Challisa Kanda	NA	Negative	NA	Negative	NA	Negative	NA	Negative	31.205	Negative	NA	Negative	NA	Negative	31.73	Negative	NA	Negative	NA	Negative	30.24	Negative	NA	Negative	13.43	Positive	NA	Negative	27.95	Maybe	NA	Negative	NA	Negative	NA	Negative	NA	Negative	28.25	Negative	18.93	Positive	33.38
682	N112601	2015-11-26 06:31:52+00:00	2015-11-28 02:00:44+00:00	Netrakona	Amtala	Gachhgaria	NA	Negative	22.245	Positive	NA	Negative	NA	Negative	31.515	Negative	21.56	Positive	NA	Negative	34.73	Negative	NA	Negative	NA	Negative	31.035	Negative	NA	Negative	13.59	Positive	NA	Negative	NA	Negative	19.395	Positive	19.595	Positive	25.32	Positive	27.41	Maybe	19.31	Positive	NA	NonDetect	28.91
683	N112602	2015-11-26 02:35:14+00:00	2015-11-28 04:00:04+00:00	Netrakona	Ward No-08	Nagra Pashim	NA	Negative	NA	Negative	NA	Negative	NA	Negative	27.525	Maybe	NA	Negative	29.93	Negative	34.31	Negative	NA	Negative	NA	Negative	28.335	Negative	NA	Negative	9.51	Positive	NA	Negative	27.86	Maybe	28.34	Negative	NA	Negative	NA	Negative	NA	Negative	24.875	Positive	14.38	Positive	28.51
684	N112603	2015-11-26 05:40:29+00:00	2015-11-26 08:40:39+00:00	Netrakona	Rauha	Baje Amli	NA	Negative	15.905	Positive	NA	Negative	NA	Negative	NA	Negative	NA	Negative	29.18	Negative	26.11	Maybe	NA	Negative	NA	Negative	23.71	Positive	NA	Negative	8.81	Positive	32.7	Negative	27.475	Maybe	16.36	Positive	NA	Negative	NA	Negative	NA	Negative	31.44	Negative	NA	NonDetect	28.61
685	N112604	2015-11-26 09:15:46+00:00	2015-11-28 05:50:14+00:00	Netrakona	Ward No-05	Malni	NA	Negative	NA	Negative	NA	Negative	NA	Negative	26.24	Maybe	NA	Negative	28.205	Negative	32.19	Negative	NA	Negative	NA	Negative	32.245	Negative	NA	Negative	11.81	Positive	NA	Negative	26.11	Maybe	NA	Negative	19.615	Positive	34.84	Negative	NA	Negative	NA	Negative	NA	NonDetect	NA
686	N112605	2015-11-26 10:10:22+00:00	2015-11-29 05:00:52+00:00	Netrakona	Sahata	Baragawa	NA	Negative	NA	Negative	NA	Negative	NA	Negative	33.495	Negative	28.185	Negative	NA	Negative	NA	Negative	NA	Negative	NA	Negative	30.635	Negative	NA	Negative	13.995	Positive	NA	Negative	NA	Negative	NA	Negative	NA	Negative	NA	Negative	NA	Negative	28.75	Negative	20.985	Positive	NA
687	N112606	2015-11-26 10:40:41+00:00	2015-11-28 05:00:29+00:00	Netrakona	Lakshmiganj	Baishdhar	27.265	Maybe	33.16	Negative	NA	Negative	34.58	Negative	NA	Negative	NA	Negative	NA	Negative	33.09	Negative	NA	Negative	NA	Negative	32.925	Negative	NA	Negative	13.34	Positive	NA	Negative	NA	Negative	NA	Negative	22.735	Positive	17.225	Positive	24.26	Positive	25.1	Positive	19.965	Positive	30.935
688	N112607	2015-11-26 10:50:44+00:00	2015-11-28 02:00:40+00:00	Netrakona	Loneshwar	Khila	NA	Negative	NA	Negative	NA	Negative	NA	Negative	31.25	Negative	NA	Negative	NA	Negative	NA	Negative	NA	Negative	NA	Negative	NA	Negative	NA	Negative	20.855	Positive	NA	Negative	NA	Negative	NA	Negative	NA	Negative	NA	Negative	NA	Negative	NA	Negative	NA	NonDetect	NA
689	N112801	2015-11-27 20:00:01+00:00	2015-11-29 04:09:10+00:00	Netrakona	Maugati	Mara Dighi	NA	Negative	NA	Negative	NA	Negative	NA	Negative	27	Maybe	NA	Negative	NA	Negative	NA	Negative	NA	Negative	NA	Negative	29.69	Negative	NA	Negative	13.255	Positive	NA	Negative	NA	Negative	NA	Negative	27.7	Maybe	23.865	Positive	29.36	Negative	27.45	Maybe	26.81	Maybe	30.88
690	N112803	2015-11-28 03:10:21+00:00	2015-11-29 04:50:18+00:00	Netrakona	Medni	Kayrahati	NA	Negative	NA	Negative	NA	Negative	NA	Negative	29.65	Negative	NA	Negative	24.325	Positive	NA	Negative	NA	Negative	NA	Negative	NA	Negative	NA	Negative	13.2	Positive	NA	Negative	NA	Negative	25.54	Positive	27.22	Maybe	27.45	Maybe	NA	Negative	29.49	Negative	28.81	Negative	26.49
691	N112805	2015-11-28 04:35:58+00:00	2015-11-29 04:50:53+00:00	Netrakona	Lakshmiganj	Oail Para	NA	Negative	NA	Negative	NA	Negative	NA	Negative	22.39	Positive	NA	Negative	NA	Negative	29.48	Negative	NA	Negative	NA	Negative	30.04	Negative	NA	Negative	10.78	Positive	NA	Negative	NA	Negative	14.775	Positive	13.785	Positive	NA	Negative	NA	Negative	NA	Negative	33.05	Negative	27.255
692	N112806	2015-11-28 05:40:31+00:00	2015-11-29 05:00:25+00:00	Netrakona	Madanpur	Madanpur	NA	Negative	26.14	Maybe	27.515	Maybe	NA	Negative	25.96	Positive	25.78	Positive	29.235	Negative	NA	Negative	NA	Negative	NA	Negative	29.385	Negative	NA	Negative	14.09	Positive	NA	Negative	NA	Negative	21.435	Positive	21.125	Positive	26.695	Maybe	NA	Negative	23.9	Positive	NA	NonDetect	31.845
693	N112807	2015-11-28 04:55:40+00:00	2015-11-28 14:00:32+00:00	Netrakona	Ward No-08	Nagra Uttar	NA	Negative	NA	Negative	NA	Negative	NA	Negative	29.785	Negative	NA	Negative	NA	Negative	NA	Negative	NA	Negative	NA	Negative	27.44	Maybe	27.47	Maybe	8.83	Positive	NA	Negative	25.575	Positive	NA	Negative	NA	Negative	28.4	Negative	NA	Negative	26.72	Maybe	17.065	Positive	29.15
694	N112808	2015-11-28 05:30:55+00:00	2015-11-29 04:20:46+00:00	Netrakona	Challisha	Rajendrapur	NA	Negative	24.795	Positive	25.54	Positive	NA	Negative	29.005	Negative	24.06	Positive	NA	Negative	27.4	Maybe	NA	Negative	NA	Negative	NA	Negative	NA	Negative	12.065	Positive	NA	Negative	NA	Negative	22.52	Positive	22.8	Positive	26.69	Maybe	NA	Negative	21.59	Positive	NA	NonDetect	28.11
695	N112809	2015-11-28 05:35:51+00:00	2015-11-29 05:10:46+00:00	Netrakona	Sarmaisa	Rupchanpur	NA	Negative	NA	Negative	NA	Negative	NA	Negative	33.79	Negative	NA	Negative	32.01	Negative	NA	Negative	NA	Negative	NA	Negative	NA	Negative	NA	Negative	18.645	Positive	NA	Negative	NA	Negative	NA	Negative	NA	Negative	NA	Negative	NA	Negative	NA	Negative	NA	NonDetect	NA
696	N112810	2015-11-28 04:05:48+00:00	2015-11-29 04:50:18+00:00	Netrakona	Khalishaur	Dhara	NA	Negative	NA	Negative	NA	Negative	NA	Negative	27.805	Maybe	NA	Negative	30.155	Negative	31.29	Negative	NA	Negative	NA	Negative	29.95	Negative	NA	Negative	10.29	Positive	NA	Negative	24.075	Positive	NA	Negative	17.12	Positive	NA	Negative	NA	Negative	34.36	Negative	NA	NonDetect	27.88
697	N112811	2015-11-28 06:03:24+00:00	2015-11-28 11:00:47+00:00	Netrakona	Barhatta	Bari	NA	Negative	NA	Negative	NA	Negative	NA	Negative	28.84	Negative	NA	Negative	NA	Negative	28.48	Negative	NA	Negative	NA	Negative	29.125	Negative	NA	Negative	8.78	Positive	32.32	Negative	NA	Negative	NA	Negative	25.885	Positive	32.275	Negative	NA	Negative	28.45	Negative	NA	NonDetect	27.315
698	N112814	2015-11-28 09:10:14+00:00	2015-11-29 04:50:10+00:00	Netrakona	Ward No-07	Katly	NA	Negative	NA	Negative	NA	Negative	NA	Negative	31.6	Negative	27.9	Maybe	24.715	Positive	27.93	Maybe	NA	Negative	NA	Negative	27.08	Maybe	NA	Negative	9.38	Positive	31.23	Negative	28.04	Negative	NA	Negative	27.11	Maybe	26.655	Maybe	28.815	Negative	NA	Negative	24.695	Positive	26.45
699	N112815	2015-11-28 09:20:28+00:00	2015-11-28 12:00:03+00:00	Netrakona	Ward No-09	Khatib Nagua	NA	NA	NA	NA	NA	NA	NA	NA	NA	NA	NA	NA	NA	NA	NA	NA	NA	NA	NA	NA	NA	NA	NA	NA	NA	NA	NA	NA	NA	NA	NA	NA	NA	NA	NA	NA	NA	NA	NA	NA	NA	NA	NA
700	N112816	2015-11-28 10:25:07+00:00	2015-11-28 12:10:04+00:00	Netrakona	Ward No-09	Khatib Nagua	NA	NA	NA	NA	NA	NA	NA	NA	NA	NA	NA	NA	NA	NA	NA	NA	NA	NA	NA	NA	NA	NA	NA	NA	NA	NA	NA	NA	NA	NA	NA	NA	NA	NA	NA	NA	NA	NA	NA	NA	NA	NA	NA
701	N112817	2015-11-28 15:37:54+00:00	2015-11-29 04:15:08+00:00	Netrakona	Ward No-08	Nagra Pashim	NA	Negative	NA	Negative	NA	Negative	NA	Negative	32.57	Negative	NA	Negative	27.94	Maybe	NA	Negative	NA	Negative	NA	Negative	NA	Negative	NA	Negative	20.085	Positive	NA	Negative	NA	Negative	NA	Negative	NA	Negative	NA	Negative	NA	Negative	29.31	Negative	NA	NonDetect	32.97
702	N112818	2015-11-28 15:35:51+00:00	2015-11-29 05:10:56+00:00	Netrakona	Madanpur	Madanpur	NA	Negative	NA	Negative	NA	Negative	NA	Negative	34.56	Negative	NA	Negative	NA	Negative	32.28	Negative	NA	Negative	NA	Negative	NA	Negative	NA	Negative	19.26	Positive	NA	Negative	NA	Negative	NA	Negative	NA	Negative	NA	Negative	NA	Negative	NA	Negative	NA	NonDetect	NA
703	N112901	2015-11-28 18:20:52+00:00	2015-11-30 05:00:50+00:00	Netrakona	Ward No-09	Khatib Nagua	NA	Negative	NA	Negative	NA	Negative	NA	Negative	NA	Negative	NA	Negative	NA	Negative	NA	Negative	NA	Negative	NA	Negative	NA	Negative	NA	Negative	17.675	Positive	NA	Negative	NA	Negative	NA	Negative	NA	Negative	NA	Negative	NA	Negative	NA	Negative	NA	NonDetect	33.2
704	N112902	2015-11-28 20:20:48+00:00	2015-11-30 05:00:53+00:00	Netrakona	Asma	Gabarkanda	NA	Negative	NA	Negative	NA	Negative	NA	Negative	NA	Negative	NA	Negative	NA	Negative	NA	Negative	NA	Negative	NA	Negative	NA	Negative	NA	Negative	20.64	Positive	NA	Negative	NA	Negative	NA	Negative	29.42	Negative	NA	Negative	NA	Negative	NA	Negative	NA	NonDetect	NA
705	N112903	2015-11-28 22:30:29+00:00	2015-11-30 04:50:39+00:00	Netrakona	Ward No-02	Satpai Town	NA	Negative	NA	Negative	NA	Negative	NA	Negative	30.105	Negative	NA	Negative	27.98	Maybe	NA	Negative	NA	Negative	NA	Negative	34.9	Negative	NA	Negative	15.475	Positive	NA	Negative	NA	Negative	NA	Negative	NA	Negative	26.22	Maybe	NA	Negative	31.16	Negative	NA	NonDetect	33.02
706	N112904	2015-11-28 23:39:45+00:00	2015-12-02 01:00:31+00:00	Netrakona	Ward No-08	Nagra Uttar	NA	Negative	NA	Negative	NA	Negative	NA	Negative	31.25	Negative	25.555	Positive	NA	Negative	NA	Negative	NA	Negative	NA	Negative	29.745	Negative	NA	Negative	9.65	Positive	NA	Negative	NA	Negative	NA	Negative	NA	Negative	NA	Negative	NA	Negative	NA	Negative	13.275	Positive	27.32
707	N112905	2015-11-29 01:27:55+00:00	2015-11-30 05:00:52+00:00	Netrakona	Ward No-09	Khatib Nagua	NA	Negative	NA	Negative	NA	Negative	NA	Negative	31.29	Negative	22.18	Positive	33.27	Negative	29.895	Negative	NA	Negative	NA	Negative	28.31	Negative	NA	Negative	12.22	Positive	NA	Negative	28.89	Negative	NA	Negative	NA	Negative	28.38	Negative	NA	Negative	NA	Negative	NA	NonDetect	NA
708	N112906	2015-11-29 03:20:14+00:00	2015-11-29 09:55:54+00:00	Netrakona	Singhar Bangla	Panchananpur	NA	Negative	NA	Negative	NA	Negative	NA	Negative	28.415	Negative	NA	Negative	NA	Negative	NA	Negative	NA	Negative	NA	Negative	34.21	Negative	NA	Negative	15.71	Positive	NA	Negative	NA	Negative	NA	Negative	NA	Negative	NA	Negative	NA	Negative	NA	Negative	NA	NonDetect	30.08
709	N112907	2015-11-29 03:40:39+00:00	2015-11-30 05:00:53+00:00	Netrakona	Kaliara Gabragat	Bansati	NA	Negative	NA	Negative	NA	Negative	NA	Negative	27.855	Maybe	NA	Negative	32.71	Negative	NA	Negative	NA	Negative	NA	Negative	NA	Negative	NA	Negative	11.98	Positive	NA	Negative	NA	Negative	NA	Negative	NA	Negative	NA	Negative	NA	Negative	NA	Negative	NA	NonDetect	32.925
710	N112908	2015-11-29 04:00:30+00:00	2015-11-30 05:00:28+00:00	Netrakona	Ward No-06	Arambag	NA	Negative	NA	Negative	NA	Negative	NA	Negative	24.78	Positive	NA	Negative	29.7	Negative	NA	Negative	NA	Negative	NA	Negative	28.98	Negative	NA	Negative	12.835	Positive	NA	Negative	NA	Negative	NA	Negative	27.54	Maybe	NA	Negative	NA	Negative	NA	Negative	30.61	Negative	30.05
711	N112909	2015-11-29 04:35:20+00:00	2015-11-30 05:00:02+00:00	Netrakona	Ward No-09	Parla	NA	NA	NA	NA	NA	NA	NA	NA	NA	NA	NA	NA	NA	NA	NA	NA	NA	NA	NA	NA	NA	NA	NA	NA	NA	NA	NA	NA	NA	NA	NA	NA	NA	NA	NA	NA	NA	NA	NA	NA	NA	NA	NA
712	N112910	2015-11-29 05:45:34+00:00	2015-11-29 09:55:38+00:00	Netrakona	Sarmaisa	Ayma Debipur	NA	Negative	NA	Negative	NA	Negative	NA	Negative	33.92	Negative	NA	Negative	NA	Negative	34.77	Negative	NA	Negative	NA	Negative	NA	Negative	NA	Negative	15.375	Positive	NA	Negative	NA	Negative	NA	Negative	NA	Negative	NA	Negative	NA	Negative	NA	Negative	21.775	Positive	32.445
713	N112911	2015-11-29 06:00:55+00:00	2015-11-29 10:12:13+00:00	Netrakona	Singhar Bangla	Roydum Ruhi	34.91	Negative	NA	Negative	24.28	Positive	NA	Negative	30.595	Negative	23.79	Positive	NA	Negative	NA	Negative	NA	Negative	NA	Negative	NA	Negative	NA	Negative	12.49	Positive	NA	Negative	28.92	Negative	NA	Negative	22.19	Positive	22.455	Positive	NA	Negative	20.66	Positive	NA	NonDetect	NA
714	N112912	2015-11-29 06:15:43+00:00	2015-11-30 04:50:12+00:00	Netrakona	Madanpur	Madanpur	NA	Negative	NA	Negative	NA	Negative	NA	Negative	25.405	Positive	NA	Negative	NA	Negative	NA	Negative	NA	Negative	NA	Negative	30.39	Negative	NA	Negative	11.925	Positive	NA	Negative	NA	Negative	NA	Negative	NA	Negative	NA	Negative	NA	Negative	33.625	Negative	NA	NonDetect	33.825
715	N112913	2015-11-29 07:00:00+00:00	2015-12-02 04:55:59+00:00	Netrakona	Asujia	Gobindapur	NA	Negative	NA	Negative	NA	Negative	NA	Negative	NA	Negative	NA	Negative	NA	Negative	NA	Negative	NA	Negative	NA	Negative	NA	Negative	NA	Negative	21.87	Positive	NA	Negative	NA	Negative	NA	Negative	NA	Negative	NA	Negative	NA	Negative	NA	Negative	NA	NonDetect	NA
716	N112914	2015-11-29 08:50:38+00:00	2015-11-30 05:00:47+00:00	Netrakona	Ward No-03	Pukuria	NA	Negative	NA	Negative	NA	Negative	NA	Negative	26.95	Maybe	23.05	Positive	NA	Negative	34.95	Negative	NA	Negative	NA	Negative	NA	Negative	NA	Negative	14.045	Positive	NA	Negative	NA	Negative	NA	Negative	NA	Negative	NA	Negative	NA	Negative	NA	Negative	NA	NonDetect	NA
717	N112915	2015-11-29 10:35:05+00:00	2015-11-30 05:00:47+00:00	Netrakona	Ward No-05	Mailora	NA	Negative	NA	Negative	NA	Negative	NA	Negative	NA	Negative	NA	Negative	29.82	Negative	NA	Negative	NA	Negative	NA	Negative	32.81	Negative	NA	Negative	11.485	Positive	NA	Negative	NA	Negative	NA	Negative	NA	Negative	NA	Negative	NA	Negative	NA	Negative	NA	NonDetect	32.68
718	N112916	2015-11-29 10:56:00+00:00	2015-11-30 05:00:34+00:00	Netrakona	Amtala	Shibprasadpur	NA	Negative	NA	Negative	NA	Negative	NA	Negative	30.81	Negative	NA	Negative	NA	Negative	27.275	Maybe	NA	Negative	NA	Negative	27.26	Maybe	NA	Negative	10.46	Positive	34.52	Negative	NA	Negative	NA	Negative	19.02	Positive	NA	Negative	NA	Negative	NA	Negative	NA	NonDetect	31.84
719	N112917	2015-11-29 11:30:09+00:00	2015-12-02 04:46:07+00:00	Netrakona	Barhatta	Nischintapur	NA	Negative	NA	Negative	NA	Negative	NA	Negative	NA	Negative	NA	Negative	NA	Negative	NA	Negative	NA	Negative	NA	Negative	30.735	Negative	NA	Negative	12.25	Positive	NA	Negative	NA	Negative	NA	Negative	NA	Negative	15.465	Positive	20.63	Positive	25.92	Positive	NA	NonDetect	33.78
720	N112918	2015-11-29 11:40:27+00:00	2015-12-02 01:00:28+00:00	Netrakona	Amtala	Balnia	NA	Negative	NA	Negative	NA	Negative	NA	Negative	24.88	Positive	NA	Negative	28.59	Negative	NA	Negative	NA	Negative	NA	Negative	34.73	Negative	NA	Negative	15.08	Positive	NA	Negative	NA	Negative	NA	Negative	NA	Negative	NA	Negative	NA	Negative	NA	Negative	NA	NonDetect	NA
721	N112919	2015-11-29 11:45:20+00:00	2015-11-29 13:40:05+00:00	Netrakona	Challisha	Challisha	NA	NA	NA	NA	NA	NA	NA	NA	NA	NA	NA	NA	NA	NA	NA	NA	NA	NA	NA	NA	NA	NA	NA	NA	NA	NA	NA	NA	NA	NA	NA	NA	NA	NA	NA	NA	NA	NA	NA	NA	NA	NA	NA
722	N112920	2015-11-29 12:35:09+00:00	2015-11-30 05:00:19+00:00	Netrakona	Ward No-07	Joynagar	NA	NA	NA	NA	NA	NA	NA	NA	NA	NA	NA	NA	NA	NA	NA	NA	NA	NA	NA	NA	NA	NA	NA	NA	NA	NA	NA	NA	NA	NA	NA	NA	NA	NA	NA	NA	NA	NA	NA	NA	NA	NA	NA
723	N112921	2015-11-29 14:50:24+00:00	2015-12-02 05:00:57+00:00	Netrakona	Ward No-06	Arambag	NA	Negative	NA	Negative	NA	Negative	NA	Negative	NA	Negative	NA	Negative	NA	Negative	NA	Negative	32.18	Negative	NA	Negative	NA	Negative	NA	Negative	14.275	Positive	NA	Negative	NA	Negative	NA	Negative	NA	Negative	NA	Negative	NA	Negative	NA	Negative	NA	NonDetect	34.08
724	N112922	2015-11-29 15:00:50+00:00	2015-12-02 04:30:58+00:00	Netrakona	Sahata	Madhupur	NA	Negative	NA	Negative	NA	Negative	NA	Negative	31.12	Negative	NA	Negative	NA	Negative	NA	Negative	NA	Negative	NA	Negative	34.8	Negative	NA	Negative	15.985	Positive	NA	Negative	NA	Negative	NA	Negative	NA	Negative	33.07	Negative	NA	Negative	NA	Negative	NA	NonDetect	34.565
725	N113001	2015-11-30 03:35:28+00:00	2015-12-02 04:40:54+00:00	Netrakona	Rauha	Hasimpur	NA	NA	NA	NA	NA	NA	NA	NA	NA	NA	NA	NA	NA	NA	NA	NA	NA	NA	NA	NA	NA	NA	NA	NA	NA	NA	NA	NA	NA	NA	NA	NA	NA	NA	NA	NA	NA	NA	NA	NA	NA	NA	NA
726	N113002	2015-11-30 04:30:19+00:00	2015-11-30 08:00:51+00:00	Netrakona	Dhala Mulgaon	Bade Binna	NA	Negative	NA	Negative	NA	Negative	NA	Negative	27.73	Maybe	29.565	Negative	NA	Negative	24.23	Positive	NA	Negative	NA	Negative	NA	Negative	NA	Negative	8.48	Positive	34.125	Negative	NA	Negative	23.05	Positive	30.09	Negative	NA	Negative	NA	Negative	34.32	Negative	NA	NonDetect	29.725
727	N113003	2015-11-30 06:33:09+00:00	2015-12-02 05:00:24+00:00	Netrakona	Dakshin Bishiura	Sreepur Bali	NA	Negative	NA	Negative	NA	Negative	NA	Negative	34.12	Negative	NA	Negative	NA	Negative	NA	Negative	NA	Negative	NA	Negative	30.045	Negative	NA	Negative	12.22	Positive	NA	Negative	NA	Negative	NA	Negative	NA	Negative	27.89	Maybe	NA	Negative	NA	Negative	32.59	Negative	32.635
728	N113004	2015-11-30 07:00:40+00:00	2015-12-03 04:20:28+00:00	Netrakona	Kaliara Gabragat	Kumarpur	NA	Negative	NA	Negative	NA	Negative	NA	Negative	27.55	Maybe	NA	Negative	27.19	Maybe	34.89	Negative	NA	Negative	NA	Negative	32.76	Negative	NA	Negative	9.335	Positive	NA	Negative	NA	Negative	NA	Negative	NA	Negative	25.42	Positive	NA	Negative	27.55	Maybe	NA	NonDetect	30.24
729	N113005	2015-11-30 10:54:57+00:00	2015-12-01 01:00:26+00:00	Netrakona	Ward No-05	Malni	NA	NA	NA	NA	NA	NA	NA	NA	NA	NA	NA	NA	NA	NA	NA	NA	NA	NA	NA	NA	NA	NA	NA	NA	NA	NA	NA	NA	NA	NA	NA	NA	NA	NA	NA	NA	NA	NA	NA	NA	NA	NA	NA
730	N113006	2015-11-30 13:00:01+00:00	2015-12-01 04:30:19+00:00	Netrakona	Singhar Bangla	Panchananpur	NA	Negative	NA	Negative	NA	Negative	NA	Negative	34.17	Negative	NA	Negative	NA	Negative	32.58	Negative	NA	Negative	NA	Negative	30.73	Negative	NA	Negative	13.9	Positive	NA	Negative	NA	Negative	NA	Negative	NA	Negative	NA	Negative	NA	Negative	NA	Negative	NA	NonDetect	NA
731	N113007	2015-11-30 13:40:07+00:00	2015-12-01 07:00:09+00:00	Netrakona	Medni	Medni	34.69	Negative	NA	Negative	NA	Negative	NA	Negative	20.95	Positive	NA	Negative	20.89	Positive	33.31	Negative	NA	Negative	NA	Negative	29.91	Negative	NA	Negative	8.395	Positive	NA	Negative	NA	Negative	NA	Negative	30.76	Negative	25.43	Positive	NA	Negative	26.165	Maybe	NA	NonDetect	31.65
732	N113008	2015-11-30 14:05:06+00:00	2015-12-01 05:00:22+00:00	Netrakona	Ward No-01	Gram Satpai_(1)	NA	Negative	NA	Negative	NA	Negative	NA	Negative	28.07	Negative	NA	Negative	NA	Negative	28.375	Negative	NA	Negative	NA	Negative	27.9	Maybe	NA	Negative	11.47	Positive	NA	Negative	NA	Negative	NA	Negative	31.895	Negative	NA	Negative	NA	Negative	30.12	Negative	NA	NonDetect	32.39
733	N113009	2015-11-30 17:40:20+00:00	2015-12-03 05:00:46+00:00	Netrakona	Ward No-09	Balai Nagua	NA	Negative	NA	Negative	NA	Negative	NA	Negative	NA	Negative	NA	Negative	NA	Negative	NA	Negative	NA	Negative	NA	Negative	NA	Negative	NA	Negative	16.065	Positive	NA	Negative	NA	Negative	27.1	Maybe	26.88	Maybe	28.205	Negative	NA	Negative	31.325	Negative	NA	NonDetect	32.86
734	N120101	2015-12-01 03:23:24+00:00	2015-12-02 05:00:03+00:00	Netrakona	Rauha	Kunia Mulnachati	NA	Negative	NA	Negative	NA	Negative	NA	Negative	29.96	Negative	NA	Negative	NA	Negative	NA	Negative	NA	Negative	NA	Negative	NA	Negative	28.46	Negative	8.555	Positive	NA	Negative	28.24	Negative	NA	Negative	34.95	Negative	29.23	Negative	NA	Negative	27.2	Maybe	NA	NonDetect	28.245
735	N120103	2015-12-01 04:35:42+00:00	2015-12-01 12:50:30+00:00	Netrakona	Singhar Bangla	Faridpur	NA	Negative	NA	Negative	NA	Negative	NA	Negative	26.225	Maybe	NA	Negative	NA	Negative	NA	Negative	NA	Negative	NA	Negative	NA	Negative	NA	Negative	14.995	Positive	NA	Negative	NA	Negative	NA	Negative	NA	Negative	NA	Negative	NA	Negative	19.625	Positive	NA	NonDetect	29
736	N120104	2015-12-01 04:37:21+00:00	2015-12-02 05:00:26+00:00	Netrakona	Baniajan	Bishnupur	NA	Negative	NA	Negative	NA	Negative	NA	Negative	26.62	Maybe	NA	Negative	NA	Negative	NA	Negative	NA	Negative	NA	Negative	28.9	Negative	NA	Negative	12.575	Positive	NA	Negative	NA	Negative	NA	Negative	NA	Negative	NA	Negative	NA	Negative	NA	Negative	NA	NonDetect	NA
737	N120105	2015-12-01 05:43:04+00:00	2015-12-01 10:25:07+00:00	Netrakona	Ward No-03	Mahendarapur	NA	Negative	NA	Negative	NA	Negative	NA	Negative	NA	Negative	NA	Negative	NA	Negative	NA	Negative	NA	Negative	NA	Negative	31.395	Negative	NA	Negative	13.135	Positive	NA	Negative	NA	Negative	NA	Negative	NA	Negative	NA	Negative	NA	Negative	16.615	Positive	NA	NonDetect	26.94
738	N120106	2015-12-01 08:00:07+00:00	2015-12-02 04:50:14+00:00	Netrakona	Ward No-05	Malni	NA	NA	NA	NA	NA	NA	NA	NA	NA	NA	NA	NA	NA	NA	NA	NA	NA	NA	NA	NA	NA	NA	NA	NA	NA	NA	NA	NA	NA	NA	NA	NA	NA	NA	NA	NA	NA	NA	NA	NA	NA	NA	NA
739	N120107	2015-12-01 08:55:58+00:00	2015-12-02 05:02:23+00:00	Netrakona	Ward No-08	Nagra Dhakin	NA	Negative	NA	Negative	NA	Negative	NA	Negative	30.64	Negative	27.97	Maybe	25.815	Positive	NA	Negative	NA	Negative	NA	Negative	NA	Negative	NA	Negative	10.59	Positive	NA	Negative	NA	Negative	NA	Negative	28.18	Negative	NA	Negative	NA	Negative	NA	Negative	NA	NonDetect	31.63
740	N120108	2015-12-01 08:48:42+00:00	2015-12-02 05:00:53+00:00	Netrakona	Ward No-08	Nagra Dhakin	NA	Negative	NA	Negative	NA	Negative	NA	Negative	26.49	Maybe	NA	Negative	NA	Negative	NA	Negative	NA	Negative	NA	Negative	NA	Negative	NA	Negative	8.025	Positive	NA	Negative	NA	Negative	NA	Negative	NA	Negative	24.965	Positive	NA	Negative	33.67	Negative	32.31	Negative	28.285
741	N120109	2015-11-30 23:25:20+00:00	2015-12-02 05:00:33+00:00	Netrakona	Rauha	Amli Keshabpur	NA	Negative	NA	Negative	NA	Negative	NA	Negative	NA	Negative	NA	Negative	NA	Negative	NA	Negative	NA	Negative	NA	Negative	NA	Negative	NA	Negative	19.42	Positive	NA	Negative	NA	Negative	NA	Negative	NA	Negative	NA	Negative	NA	Negative	NA	Negative	NA	NonDetect	NA
742	N120110	2015-12-01 12:00:12+00:00	2015-12-01 18:00:36+00:00	Netrakona	Ward No-07	Katly	NA	Negative	NA	Negative	NA	Negative	NA	Negative	NA	Negative	NA	Negative	28.93	Negative	NA	Negative	NA	Negative	NA	Negative	25.32	Positive	NA	Negative	13.3	Positive	NA	Negative	NA	Negative	NA	Negative	NA	Negative	NA	Negative	NA	Negative	29.05	Negative	NA	NonDetect	33.83
743	N120111	2015-12-01 12:10:25+00:00	2015-12-03 12:30:22+00:00	Netrakona	Sahata	Dakshin Demura	NA	Negative	NA	Negative	NA	Negative	NA	Negative	34.99	Negative	NA	Negative	30.01	Negative	NA	Negative	NA	Negative	NA	Negative	32.57	Negative	NA	Negative	13.42	Positive	NA	Negative	NA	Negative	NA	Negative	NA	Negative	27.98	Maybe	27.71	Maybe	29.36	Negative	NA	NonDetect	NA
744	N120112	2015-12-01 13:35:02+00:00	2015-12-02 05:20:48+00:00	Netrakona	Baniajan	Bishnupur	NA	Negative	NA	Negative	NA	Negative	NA	Negative	26.56	Maybe	27.63	Maybe	28.56	Negative	30.845	Negative	NA	Negative	NA	Negative	NA	Negative	NA	Negative	12.685	Positive	NA	Negative	NA	Negative	28.18	Negative	30.66	Negative	NA	Negative	NA	Negative	NA	Negative	NA	NonDetect	28.87
745	N120113	2015-12-01 15:35:22+00:00	2015-12-02 04:50:44+00:00	Netrakona	Rauha	Amli Keshabpur	NA	Negative	NA	Negative	NA	Negative	NA	Negative	30.395	Negative	27.9	Maybe	25.89	Positive	29.39	Negative	NA	Negative	NA	Negative	NA	Negative	NA	Negative	14.225	Positive	NA	Negative	NA	Negative	26.54	Maybe	24.68	Positive	28.03	Negative	NA	Negative	26.23	Maybe	NA	NonDetect	NA
746	N120201	2015-12-01 19:30:52+00:00	2015-12-03 04:30:53+00:00	Netrakona	Kailati	Bara Kailati	NA	Negative	NA	Negative	NA	Negative	NA	Negative	28.59	Negative	24.59	Positive	28.99	Negative	33.275	Negative	NA	Negative	NA	Negative	25.28	Positive	NA	Negative	11.825	Positive	33.26	Negative	NA	Negative	28.33	Negative	34.43	Negative	NA	Negative	NA	Negative	22.455	Positive	34.77	Negative	29.515
747	N120202	2015-12-02 01:00:14+00:00	2015-12-03 04:30:58+00:00	Netrakona	Sahata	Patli	NA	NA	NA	NA	NA	NA	NA	NA	NA	NA	NA	NA	NA	NA	NA	NA	NA	NA	NA	NA	NA	NA	NA	NA	NA	NA	NA	NA	NA	NA	NA	NA	NA	NA	NA	NA	NA	NA	NA	NA	NA	NA	NA
748	N120203	2015-12-02 02:24:03+00:00	2015-12-03 04:30:15+00:00	Netrakona	Ward No-06	Purba Chota Bazar	NA	Negative	NA	Negative	NA	Negative	NA	Negative	26.03	Maybe	18.955	Positive	NA	Negative	NA	Negative	NA	Negative	NA	Negative	32.39	Negative	NA	Negative	14.33	Positive	NA	Negative	NA	Negative	NA	Negative	NA	Negative	NA	Negative	NA	Negative	32.94	Negative	NA	NonDetect	NA
749	N120204	2015-12-02 02:30:58+00:00	2015-12-03 04:30:30+00:00	Netrakona	Dhala Mulgaon	Patli	NA	Negative	NA	Negative	NA	Negative	NA	Negative	25.36	Positive	NA	Negative	NA	Negative	NA	Negative	NA	Negative	NA	Negative	32.2	Negative	NA	Negative	13.48	Positive	NA	Negative	NA	Negative	NA	Negative	NA	Negative	NA	Negative	NA	Negative	NA	Negative	NA	NonDetect	NA
750	N120205	2015-12-02 04:10:54+00:00	2015-12-03 12:30:36+00:00	Netrakona	Barhatta	Bari	NA	Negative	NA	Negative	NA	Negative	NA	Negative	25.24	Positive	NA	Negative	NA	Negative	NA	Negative	NA	Negative	NA	Negative	NA	Negative	NA	Negative	12.55	Positive	NA	Negative	NA	Negative	NA	Negative	NA	Negative	NA	Negative	NA	Negative	34.44	Negative	NA	NonDetect	NA
751	N120207	2015-12-02 05:20:44+00:00	2015-12-03 04:30:44+00:00	Netrakona	Ward No-08	Nagra Uttar	NA	NA	NA	NA	NA	NA	NA	NA	NA	NA	NA	NA	NA	NA	NA	NA	NA	NA	NA	NA	NA	NA	NA	NA	NA	NA	NA	NA	NA	NA	NA	NA	NA	NA	NA	NA	NA	NA	NA	NA	NA	NA	NA
752	N120208	2015-12-02 06:20:25+00:00	2015-12-03 04:40:18+00:00	Netrakona	Maugati	Bade Bahar	NA	Negative	NA	Negative	NA	Negative	NA	Negative	NA	Negative	29.62	Negative	NA	Negative	26.035	Maybe	NA	Negative	NA	Negative	26.74	Maybe	NA	Negative	8.79	Positive	NA	Negative	NA	Negative	NA	Negative	28.055	Negative	NA	Negative	NA	Negative	NA	Negative	NA	NonDetect	28.735
753	N120209	2015-12-01 18:54:51+00:00	2015-12-03 05:00:09+00:00	Netrakona	Lakshmiganj	Sultanganti	21.175	Positive	NA	Negative	NA	Negative	NA	Negative	NA	Negative	NA	Negative	NA	Negative	NA	Negative	NA	Negative	NA	Negative	32.57	Negative	NA	Negative	12.105	Positive	NA	Negative	NA	Negative	NA	Negative	33.815	Negative	NA	Negative	NA	Negative	28.48	Negative	NA	NonDetect	32.44
754	N120210	2015-12-02 07:15:32+00:00	2015-12-03 05:00:37+00:00	Netrakona	Ward No-02	Dakhin Satpai Nadir Par(Palpar	NA	Negative	NA	Negative	27.705	Maybe	NA	Negative	28.39	Negative	27.74	Maybe	NA	Negative	27.445	Maybe	NA	Negative	NA	Negative	NA	Negative	NA	Negative	13.29	Positive	NA	Negative	NA	Negative	NA	Negative	33.605	Negative	NA	Negative	26.615	Maybe	31.78	Negative	NA	NonDetect	32.86
755	N120213	2015-12-02 08:50:24+00:00	2015-12-03 04:30:15+00:00	Netrakona	Baniajan	Mobarakpur	NA	Negative	NA	Negative	NA	Negative	NA	Negative	NA	Negative	NA	Negative	NA	Negative	NA	Negative	NA	Negative	NA	Negative	NA	Negative	NA	Negative	18.265	Positive	NA	Negative	NA	Negative	NA	Negative	NA	Negative	NA	Negative	NA	Negative	NA	Negative	NA	NonDetect	NA
756	N120214	2015-12-02 09:00:37+00:00	2015-12-03 04:30:00+00:00	Netrakona	Barhatta	Baragaon	NA	NA	NA	NA	NA	NA	NA	NA	NA	NA	NA	NA	NA	NA	NA	NA	NA	NA	NA	NA	NA	NA	NA	NA	NA	NA	NA	NA	NA	NA	NA	NA	NA	NA	NA	NA	NA	NA	NA	NA	NA	NA	NA
757	N120215	2015-12-02 13:00:24+00:00	2015-12-03 04:30:22+00:00	Netrakona	Sahata	Mankandia	NA	NA	NA	NA	NA	NA	NA	NA	NA	NA	NA	NA	NA	NA	NA	NA	NA	NA	NA	NA	NA	NA	NA	NA	NA	NA	NA	NA	NA	NA	NA	NA	NA	NA	NA	NA	NA	NA	NA	NA	NA	NA	NA
758	N120216	2015-12-02 17:00:07+00:00	2015-12-03 03:30:20+00:00	Netrakona	Ward No-08	Nagra Pashim	NA	NA	NA	NA	NA	NA	NA	NA	NA	NA	NA	NA	NA	NA	NA	NA	NA	NA	NA	NA	NA	NA	NA	NA	NA	NA	NA	NA	NA	NA	NA	NA	NA	NA	NA	NA	NA	NA	NA	NA	NA	NA	NA
759	N120301	2015-12-03 01:10:00+00:00	2015-12-03 12:30:06+00:00	Netrakona	Ward No-05	Sibgonj Road	NA	Negative	NA	Negative	25.125	Positive	NA	Negative	NA	Negative	26.6	Maybe	29.675	Negative	NA	Negative	NA	Negative	NA	Negative	28.745	Negative	NA	Negative	10.105	Positive	NA	Negative	NA	Negative	NA	Negative	NA	Negative	16.295	Positive	NA	Negative	31.6	Negative	NA	NonDetect	30.76
760	N120303	2015-12-03 10:00:40+00:00	2015-12-04 00:00:42+00:00	Netrakona	Kailati	Sholapai	NA	Negative	NA	Negative	NA	Negative	NA	Negative	30.055	Negative	NA	Negative	NA	Negative	31.91	Negative	NA	Negative	NA	Negative	NA	Negative	NA	Negative	16.3	Positive	NA	Negative	NA	Negative	NA	Negative	NA	Negative	NA	Negative	25.985	Positive	NA	Negative	NA	NonDetect	32.19
761	N120501	2015-12-05 03:20:30+00:00	2015-12-06 05:00:09+00:00	Netrakona	Maugati	Halaidati	NA	NA	NA	NA	NA	NA	NA	NA	NA	NA	NA	NA	NA	NA	NA	NA	NA	NA	NA	NA	NA	NA	NA	NA	NA	NA	NA	NA	NA	NA	NA	NA	NA	NA	NA	NA	NA	NA	NA	NA	NA	NA	NA
762	N120502	2015-12-05 05:30:52+00:00	2015-12-06 04:50:01+00:00	Netrakona	Amtala	Abdullapur	NA	Negative	NA	Negative	NA	Negative	NA	Negative	NA	Negative	NA	Negative	NA	Negative	NA	Negative	NA	Negative	NA	Negative	NA	Negative	NA	Negative	19.9	Positive	NA	Negative	NA	Negative	NA	Negative	NA	Negative	NA	Negative	NA	Negative	NA	Negative	NA	NonDetect	NA
763	N120503	2015-12-05 06:20:45+00:00	2015-12-05 09:40:11+00:00	Netrakona	Rauha	Bara Gara	NA	Negative	NA	Negative	NA	Negative	NA	Negative	33.79	Negative	NA	Negative	NA	Negative	33.82	Negative	NA	Negative	NA	Negative	31.63	Negative	NA	Negative	11.85	Positive	NA	Negative	28.23	Negative	NA	Negative	NA	Negative	26.31	Maybe	NA	Negative	NA	Negative	NA	NonDetect	NA
764	N120504	2015-12-05 06:35:24+00:00	2015-12-06 05:00:01+00:00	Netrakona	Medni	Baroari	NA	Negative	NA	Negative	NA	Negative	NA	Negative	26.57	Maybe	17.72	Positive	NA	Negative	32.19	Negative	NA	Negative	NA	Negative	31.51	Negative	NA	Negative	11.415	Positive	NA	Negative	NA	Negative	25.72	Positive	NA	Negative	20.845	Positive	NA	Negative	NA	Negative	NA	NonDetect	32.165
765	N120505	2015-12-05 07:00:21+00:00	2015-12-06 04:00:24+00:00	Netrakona	Kailati	Phaiska	NA	NA	NA	NA	NA	NA	NA	NA	NA	NA	NA	NA	NA	NA	NA	NA	NA	NA	NA	NA	NA	NA	NA	NA	NA	NA	NA	NA	NA	NA	NA	NA	NA	NA	NA	NA	NA	NA	NA	NA	NA	NA	NA
766	N120506	2015-12-05 08:20:21+00:00	2015-12-06 05:00:43+00:00	Netrakona	Ward No-02	Satpai Town	NA	NA	NA	NA	NA	NA	NA	NA	NA	NA	NA	NA	NA	NA	NA	NA	NA	NA	NA	NA	NA	NA	NA	NA	NA	NA	NA	NA	NA	NA	NA	NA	NA	NA	NA	NA	NA	NA	NA	NA	NA	NA	NA
767	N120507	2015-12-05 08:30:04+00:00	2015-12-06 13:00:10+00:00	Netrakona	Kandiura	Bishnupur	NA	Negative	NA	Negative	NA	Negative	NA	Negative	28.09	Negative	NA	Negative	25.71	Positive	33.005	Negative	NA	Negative	NA	Negative	34.85	Negative	NA	Negative	12.455	Positive	NA	Negative	NA	Negative	NA	Negative	NA	Negative	NA	Negative	NA	Negative	NA	Negative	NA	NonDetect	NA
768	N120508	2015-12-05 10:30:07+00:00	2015-12-07 04:10:23+00:00	Netrakona	Maugati	Phadulia	NA	Negative	NA	Negative	NA	Negative	NA	Negative	33.27	Negative	NA	Negative	20.74	Positive	NA	Negative	NA	Negative	NA	Negative	NA	Negative	NA	Negative	16.94	Positive	NA	Negative	NA	Negative	NA	Negative	23.535	Positive	NA	Negative	NA	Negative	NA	Negative	NA	NonDetect	NA
769	N120510	2015-12-05 16:00:31+00:00	2015-12-06 04:10:54+00:00	Netrakona	Ward No-02	Satpai Town	NA	Negative	NA	Negative	NA	Negative	NA	Negative	33.52	Negative	NA	Negative	21.44	Positive	NA	Negative	NA	Negative	NA	Negative	NA	Negative	NA	Negative	16.52	Positive	NA	Negative	NA	Negative	NA	Negative	NA	Negative	NA	Negative	NA	Negative	30.935	Negative	NA	NonDetect	NA
770	N120511	2015-12-05 17:30:41+00:00	2015-12-07 04:00:41+00:00	Netrakona	Ward No-08	Nagra Uttar	NA	Negative	NA	Negative	NA	Negative	NA	Negative	NA	Negative	NA	Negative	26.97	Maybe	NA	Negative	NA	Negative	NA	Negative	NA	Negative	NA	Negative	14.83	Positive	NA	Negative	NA	Negative	NA	Negative	NA	Negative	NA	Negative	NA	Negative	NA	Negative	NA	NonDetect	NA
771	N120601	2015-12-05 19:11:16+00:00	2015-12-06 05:00:16+00:00	Netrakona	Challisha	Challisha	NA	Negative	NA	Negative	NA	Negative	NA	Negative	NA	Negative	NA	Negative	NA	Negative	NA	Negative	NA	Negative	NA	Negative	NA	Negative	NA	Negative	28.69	Negative	NA	Negative	NA	Negative	NA	Negative	NA	Negative	NA	Negative	NA	Negative	NA	Negative	NA	NonDetect	NA
772	N120602	2015-12-05 21:30:29+00:00	2015-12-07 04:30:46+00:00	Netrakona	Bara Kharpan	Baraiund	NA	Negative	NA	Negative	NA	Negative	NA	Negative	26.41	Maybe	17.21	Positive	26.18	Maybe	NA	Negative	NA	Negative	NA	Negative	NA	Negative	NA	Negative	13.175	Positive	NA	Negative	NA	Negative	NA	Negative	33.92	Negative	NA	Negative	NA	Negative	NA	Negative	NA	NonDetect	34.32
773	N120603	2015-12-05 23:30:06+00:00	2015-12-06 06:10:05+00:00	Netrakona	Medni	Medni	NA	Negative	NA	Negative	NA	Negative	NA	Negative	NA	Negative	NA	Negative	NA	Negative	NA	Negative	NA	Negative	NA	Negative	33.38	Negative	NA	Negative	26.17	Maybe	NA	Negative	NA	Negative	NA	Negative	NA	Negative	NA	Negative	NA	Negative	NA	Negative	NA	NonDetect	NA
774	N120605	2015-12-06 04:08:59+00:00	2015-12-07 04:35:00+00:00	Netrakona	Maugati	Maugati	NA	Negative	NA	Negative	NA	Negative	NA	Negative	30.725	Negative	NA	Negative	NA	Negative	NA	Negative	NA	Negative	NA	Negative	NA	Negative	NA	Negative	16.5	Positive	NA	Negative	NA	Negative	NA	Negative	NA	Negative	NA	Negative	NA	Negative	NA	Negative	27.505	Maybe	34.59
775	N120606	2015-12-06 04:48:22+00:00	2015-12-07 05:00:12+00:00	Netrakona	Madanpur	Madanpur	NA	Negative	NA	Negative	NA	Negative	NA	Negative	30.31	Negative	NA	Negative	NA	Negative	NA	Negative	NA	Negative	NA	Negative	NA	Negative	NA	Negative	19.08	Positive	NA	Negative	NA	Negative	NA	Negative	NA	Negative	NA	Negative	NA	Negative	19.4	Positive	NA	NonDetect	NA
776	N120607	2015-12-06 05:00:03+00:00	2015-12-07 04:20:14+00:00	Netrakona	Barhatta	Bikramsree	NA	Negative	NA	Negative	NA	Negative	NA	Negative	27.9	Maybe	NA	Negative	NA	Negative	NA	Negative	NA	Negative	NA	Negative	NA	Negative	NA	Negative	16.485	Positive	NA	Negative	NA	Negative	NA	Negative	NA	Negative	NA	Negative	NA	Negative	NA	Negative	NA	NonDetect	NA
777	N120608	2015-12-06 05:10:54+00:00	2015-12-07 04:50:31+00:00	Netrakona	Medni	Krishnapur	NA	Negative	NA	Negative	NA	Negative	NA	Negative	NA	Negative	20.76	Positive	27.37	Maybe	33.325	Negative	NA	Negative	NA	Negative	28.765	Negative	NA	Negative	9.95	Positive	NA	Negative	NA	Negative	NA	Negative	31.345	Negative	17.5	Positive	19.475	Positive	30.65	Negative	NA	NonDetect	30.89
778	N120611	2015-12-06 09:05:37+00:00	2015-12-07 04:40:05+00:00	Netrakona	Barhatta	Garma(Para Garem)	NA	Negative	NA	Negative	NA	Negative	NA	Negative	26.1	Maybe	26.78	Maybe	28.9	Negative	33.065	Negative	NA	Negative	NA	Negative	32.885	Negative	NA	Negative	14.075	Positive	NA	Negative	NA	Negative	NA	Negative	NA	Negative	NA	Negative	NA	Negative	31.135	Negative	NA	NonDetect	29.19
779	N120612	2015-12-06 10:10:12+00:00	2015-12-08 04:50:36+00:00	Netrakona	Ward No-02	Satpai Town	NA	Negative	NA	Negative	NA	Negative	NA	Negative	29.305	Negative	21.325	Positive	NA	Negative	NA	Negative	NA	Negative	NA	Negative	28.945	Negative	NA	Negative	11.375	Positive	NA	Negative	NA	Negative	NA	Negative	NA	Negative	24.12	Positive	NA	Negative	29.305	Negative	NA	NonDetect	32.45
780	N120613	2015-12-06 11:10:22+00:00	2015-12-07 04:15:41+00:00	Netrakona	Lakshmiganj	Atka Para	33.06	Negative	NA	Negative	NA	Negative	NA	Negative	27.25	Maybe	NA	Negative	NA	Negative	32.745	Negative	NA	Negative	NA	Negative	30.635	Negative	NA	Negative	11.935	Positive	NA	Negative	NA	Negative	NA	Negative	31.87	Negative	23.59	Positive	NA	Negative	NA	Negative	NA	NonDetect	34.085
781	N120614	2015-12-06 11:45:50+00:00	2015-12-07 05:00:47+00:00	Netrakona	Singhar Bangla	Mymensingh Ruhi	NA	Negative	NA	Negative	NA	Negative	NA	Negative	NA	Negative	NA	Negative	NA	Negative	NA	Negative	NA	Negative	NA	Negative	30.47	Negative	NA	Negative	12.37	Positive	NA	Negative	NA	Negative	NA	Negative	NA	Negative	NA	Negative	NA	Negative	NA	Negative	NA	NonDetect	NA
782	N120615	2015-12-05 23:45:43+00:00	2015-12-08 04:00:15+00:00	Netrakona	Maugati	Kanchanpur	NA	Negative	NA	Negative	NA	Negative	NA	Negative	28.685	Negative	NA	Negative	NA	Negative	30.495	Negative	NA	Negative	NA	Negative	28.085	Negative	NA	Negative	10.16	Positive	NA	Negative	NA	Negative	NA	Negative	NA	Negative	17.26	Positive	NA	Negative	NA	Negative	NA	NonDetect	32.67
783	N120701	2015-12-07 03:10:59+00:00	2015-12-07 09:35:54+00:00	Netrakona	Rauha	Haripur	NA	Negative	26.885	Maybe	NA	Negative	NA	Negative	29.22	Negative	NA	Negative	23.83	Positive	NA	Negative	NA	Negative	NA	Negative	31.72	Negative	NA	Negative	9.4	Positive	NA	Negative	NA	Negative	NA	Negative	NA	Negative	NA	Negative	NA	Negative	NA	Negative	NA	NonDetect	28.43
784	N120702	2015-12-07 04:30:15+00:00	2015-12-08 04:20:23+00:00	Netrakona	Pogla	Pathan Para	NA	Negative	NA	Negative	NA	Negative	NA	Negative	28.91	Negative	26.33	Maybe	NA	Negative	NA	Negative	NA	Negative	NA	Negative	33.16	Negative	NA	Negative	12.095	Positive	NA	Negative	NA	Negative	NA	Negative	NA	Negative	28.49	Negative	NA	Negative	NA	Negative	NA	NonDetect	34.84
785	N120703	2015-12-07 04:35:27+00:00	2015-12-08 04:30:49+00:00	Netrakona	Maugati	Halaidati	NA	Negative	NA	Negative	NA	Negative	NA	Negative	24.88	Positive	NA	Negative	NA	Negative	NA	Negative	NA	Negative	NA	Negative	31.66	Negative	NA	Negative	13.695	Positive	NA	Negative	NA	Negative	28.18	Negative	NA	Negative	NA	Negative	NA	Negative	NA	Negative	NA	NonDetect	NA
786	N120704	2015-12-07 05:00:21+00:00	2015-12-09 05:10:39+00:00	Netrakona	Ward No-05	Malni	NA	Negative	NA	Negative	NA	Negative	27.94	Maybe	32.86	Negative	24.35	Positive	28.19	Negative	NA	Negative	NA	Negative	NA	Negative	32.42	Negative	NA	Negative	13.05	Positive	NA	Negative	NA	Negative	NA	Negative	NA	Negative	NA	Negative	NA	Negative	NA	Negative	NA	NonDetect	33.385
787	N120705	2015-12-07 06:20:44+00:00	2015-12-07 08:00:14+00:00	Netrakona	Medni	Medni	NA	NA	NA	NA	NA	NA	NA	NA	NA	NA	NA	NA	NA	NA	NA	NA	NA	NA	NA	NA	NA	NA	NA	NA	NA	NA	NA	NA	NA	NA	NA	NA	NA	NA	NA	NA	NA	NA	NA	NA	NA	NA	NA
788	N120706	2015-12-07 08:00:02+00:00	2015-12-08 01:00:47+00:00	Netrakona	Kailati	Banipur	NA	Negative	NA	Negative	NA	Negative	NA	Negative	NA	Negative	NA	Negative	23.625	Positive	NA	Negative	NA	Negative	NA	Negative	34.94	Negative	NA	Negative	15.95	Positive	NA	Negative	NA	Negative	NA	Negative	NA	Negative	19.625	Positive	NA	Negative	NA	Negative	NA	NonDetect	NA
789	N120707	2015-12-07 09:10:49+00:00	2015-12-09 04:50:42+00:00	Netrakona	Pogla	Panch Para	NA	Negative	NA	Negative	NA	Negative	NA	Negative	27.4	Maybe	NA	Negative	NA	Negative	34.24	Negative	NA	Negative	NA	Negative	NA	Negative	NA	Negative	15.83	Positive	NA	Negative	NA	Negative	NA	Negative	NA	Negative	19.835	Positive	NA	Negative	32.53	Negative	NA	NonDetect	32.59
790	N120708	2015-12-07 10:58:14+00:00	2015-12-09 05:00:17+00:00	Netrakona	Amtala	Balnia	NA	Negative	NA	Negative	NA	Negative	NA	Negative	NA	Negative	NA	Negative	NA	Negative	NA	Negative	NA	Negative	NA	Negative	32.32	Negative	NA	Negative	16.03	Positive	NA	Negative	NA	Negative	NA	Negative	NA	Negative	21.57	Positive	NA	Negative	NA	Negative	NA	NonDetect	NA
791	N120709	2015-12-07 11:32:15+00:00	2015-12-08 00:00:39+00:00	Netrakona	Challisha	Challisha	NA	Negative	NA	Negative	NA	Negative	NA	Negative	NA	Negative	NA	Negative	27.03	Maybe	34.85	Negative	NA	Negative	NA	Negative	30.57	Negative	NA	Negative	13.52	Positive	NA	Negative	NA	Negative	NA	Negative	34.44	Negative	NA	Negative	NA	Negative	NA	Negative	NA	NonDetect	NA
792	N120710	2015-12-07 17:25:19+00:00	2015-12-10 04:37:26+00:00	Netrakona	Medni	Paschim Uluati	NA	Negative	NA	Negative	NA	Negative	NA	Negative	NA	Negative	NA	Negative	25.595	Positive	NA	Negative	NA	Negative	NA	Negative	33.355	Negative	NA	Negative	13.26	Positive	NA	Negative	NA	Negative	NA	Negative	NA	Negative	16.93	Positive	NA	Negative	34.42	Negative	NA	NonDetect	32.94
793	N120801	2015-12-08 01:50:57+00:00	2015-12-09 05:00:38+00:00	Netrakona	Ward No-09	Khatib Nagua	NA	Negative	NA	Negative	NA	Negative	NA	Negative	21.15	Positive	NA	Negative	29.41	Negative	34.41	Negative	NA	Negative	NA	Negative	28.43	Negative	NA	Negative	10.01	Positive	NA	Negative	NA	Negative	NA	Negative	NA	Negative	NA	Negative	NA	Negative	NA	Negative	NA	NonDetect	28.515
794	N120802	2015-12-08 02:00:24+00:00	2015-12-09 05:00:04+00:00	Netrakona	Ward No-03	Mahendarapur	NA	Negative	NA	Negative	NA	Negative	NA	Negative	26.14	Maybe	NA	Negative	NA	Negative	NA	Negative	NA	Negative	NA	Negative	33.98	Negative	NA	Negative	16.075	Positive	NA	Negative	NA	Negative	NA	Negative	NA	Negative	NA	Negative	NA	Negative	NA	Negative	NA	NonDetect	NA
795	N120803	2015-12-08 04:15:17+00:00	2015-12-09 04:48:27+00:00	Netrakona	Medni	Medni	NA	Negative	NA	Negative	NA	Negative	NA	Negative	NA	Negative	NA	Negative	26.82	Maybe	26.01	Maybe	NA	Negative	NA	Negative	31.225	Negative	NA	Negative	12.295	Positive	NA	Negative	26.93	Maybe	NA	Negative	NA	Negative	NA	Negative	NA	Negative	33.72	Negative	NA	NonDetect	NA
796	N120804	2015-12-08 04:54:20+00:00	2015-12-10 04:30:34+00:00	Netrakona	Ward No-05	Islampur	NA	Negative	NA	Negative	NA	Negative	NA	Negative	NA	Negative	NA	Negative	29.9	Negative	31.385	Negative	NA	Negative	NA	Negative	28.465	Negative	NA	Negative	9.025	Positive	NA	Negative	NA	Negative	NA	Negative	28.53	Negative	15.835	Positive	NA	Negative	33.33	Negative	NA	NonDetect	30.035
797	N120805	2015-12-08 05:03:59+00:00	2015-12-09 04:30:29+00:00	Netrakona	Singhar Bangla	Roydum Ruhi	22.01	Positive	NA	Negative	NA	Negative	NA	Negative	30.535	Negative	NA	Negative	NA	Negative	30.795	Negative	NA	Negative	NA	Negative	28.01	Negative	NA	Negative	9.06	Positive	31.98	Negative	NA	Negative	NA	Negative	33.99	Negative	28.31	Negative	29.375	Negative	27.62	Maybe	34.88	Negative	28.225
798	N120806	2015-12-08 05:46:24+00:00	2015-12-09 04:30:25+00:00	Netrakona	Medni	Garkanda	NA	Negative	NA	Negative	NA	Negative	NA	Negative	NA	Negative	NA	Negative	26.24	Maybe	NA	Negative	NA	Negative	NA	Negative	31.69	Negative	29.32	Negative	19.815	Positive	NA	Negative	NA	Negative	NA	Negative	NA	Negative	NA	Negative	NA	Negative	NA	Negative	NA	NonDetect	NA
799	N120807	2015-12-08 06:16:41+00:00	2015-12-09 04:40:50+00:00	Netrakona	Maugati	Durgapur Poshika	34.26	Negative	NA	Negative	NA	Negative	NA	Negative	18.875	Positive	NA	Negative	NA	Negative	32.7	Negative	NA	Negative	NA	Negative	28.99	Negative	NA	Negative	9.055	Positive	NA	Negative	NA	Negative	NA	Negative	29.57	Negative	12.855	Positive	NA	Negative	34.96	Negative	NA	NonDetect	32.375
800	N120809	2015-12-08 12:00:54+00:00	2015-12-10 04:20:52+00:00	Netrakona	Baushi	Dasdhar	NA	Negative	NA	Negative	NA	Negative	NA	Negative	27.65	Maybe	NA	Negative	NA	Negative	30.465	Negative	NA	Negative	NA	Negative	NA	Negative	NA	Negative	13.905	Positive	NA	Negative	NA	Negative	NA	Negative	34	Negative	NA	Negative	NA	Negative	30.76	Negative	NA	NonDetect	NA
801	N120810	2015-12-08 12:20:00+00:00	2015-12-10 04:48:28+00:00	Netrakona	Challisha	Bamnikona	NA	Negative	NA	Negative	NA	Negative	NA	Negative	NA	Negative	NA	Negative	29.38	Negative	NA	Negative	NA	Negative	NA	Negative	32.76	Negative	NA	Negative	20.315	Positive	NA	Negative	NA	Negative	NA	Negative	NA	Negative	NA	Negative	NA	Negative	NA	Negative	NA	NonDetect	30.245
802	N120811	2015-12-08 14:00:06+00:00	2015-12-09 05:00:53+00:00	Netrakona	Ward No-08	Nagra Uttar	NA	Negative	NA	Negative	NA	Negative	NA	Negative	31.255	Negative	NA	Negative	NA	Negative	NA	Negative	NA	Negative	NA	Negative	NA	Negative	NA	Negative	14.19	Positive	NA	Negative	NA	Negative	NA	Negative	NA	Negative	NA	Negative	NA	Negative	26.27	Maybe	NA	NonDetect	29.925
803	N120812	2015-12-08 14:10:07+00:00	2015-12-10 04:40:45+00:00	Netrakona	Medni	Garkanda	NA	Negative	NA	Negative	NA	Negative	NA	Negative	NA	Negative	19.05	Positive	30.17	Negative	32.11	Negative	NA	Negative	NA	Negative	27.465	Maybe	NA	Negative	8.535	Positive	NA	Negative	NA	Negative	NA	Negative	NA	Negative	22.7	Positive	NA	Negative	34.38	Negative	NA	NonDetect	28.65
804	N120813	2015-12-08 14:20:18+00:00	2015-12-09 04:30:13+00:00	Netrakona	Maugati	Durgapur Paiska	NA	Negative	NA	Negative	NA	Negative	NA	Negative	27.84	Maybe	21.365	Positive	29.7	Negative	27.625	Maybe	NA	Negative	NA	Negative	29.765	Negative	NA	Negative	10.51	Positive	NA	Negative	NA	Negative	NA	Negative	33.81	Negative	16.16	Positive	NA	Negative	31.21	Negative	NA	NonDetect	30.9
805	N120814	2015-12-08 17:17:29+00:00	2015-12-10 07:30:56+00:00	Netrakona	Singhar Bangla	Faridpur	NA	Negative	NA	Negative	NA	Negative	NA	Negative	24.05	Positive	NA	Negative	NA	Negative	NA	Negative	NA	Negative	NA	Negative	NA	Negative	NA	Negative	13.925	Positive	NA	Negative	NA	Negative	NA	Negative	NA	Negative	NA	Negative	NA	Negative	NA	Negative	NA	NonDetect	NA
806	N120901	2015-12-08 18:50:41+00:00	2015-12-09 04:45:59+00:00	Netrakona	Ward No-09	Hossain Pur	NA	Negative	NA	Negative	NA	Negative	NA	Negative	32.95	Negative	NA	Negative	NA	Negative	NA	Negative	NA	Negative	NA	Negative	NA	Negative	NA	Negative	17.43	Positive	NA	Negative	NA	Negative	NA	Negative	NA	Negative	NA	Negative	NA	Negative	NA	Negative	NA	NonDetect	29.64
807	N120902	2015-12-08 19:55:01+00:00	2015-12-09 05:49:30+00:00	Netrakona	Ward No-08	Nagra Uttar	NA	Negative	NA	Negative	NA	Negative	NA	Negative	NA	Negative	18.705	Positive	NA	Negative	30.865	Negative	NA	Negative	NA	Negative	31.04	Negative	NA	Negative	11.595	Positive	NA	Negative	NA	Negative	NA	Negative	NA	Negative	14.715	Positive	NA	Negative	NA	Negative	NA	NonDetect	29.3
808	N120903	2015-12-09 03:32:41+00:00	2015-12-10 05:00:41+00:00	Netrakona	Kaliara Gabragat	Chheopur	NA	Negative	NA	Negative	NA	Negative	NA	Negative	NA	Negative	NA	Negative	NA	Negative	30.11	Negative	NA	Negative	NA	Negative	31.275	Negative	NA	Negative	9.79	Positive	NA	Negative	NA	Negative	NA	Negative	34.01	Negative	12.755	Positive	NA	Negative	34.59	Negative	NA	NonDetect	31.555
809	N120904	2015-12-09 03:52:37+00:00	2015-12-10 04:50:52+00:00	Netrakona	Maugati	Kanchanpur	NA	Negative	NA	Negative	NA	Negative	NA	Negative	NA	Negative	NA	Negative	31.48	Negative	NA	Negative	NA	Negative	NA	Negative	32.84	Negative	NA	Negative	9.185	Positive	NA	Negative	NA	Negative	NA	Negative	34.35	Negative	24.2	Positive	NA	Negative	NA	Negative	NA	NonDetect	NA
810	N120905	2015-12-09 04:00:36+00:00	2015-12-10 04:40:31+00:00	Netrakona	Thakurakona	Panchpai	NA	Negative	NA	Negative	NA	Negative	NA	Negative	NA	Negative	NA	Negative	NA	Negative	NA	Negative	NA	Negative	NA	Negative	28.72	Negative	NA	Negative	8.44	Positive	NA	Negative	NA	Negative	NA	Negative	24.98	Positive	16.885	Positive	NA	Negative	33.335	Negative	26.15	Maybe	30.485
811	N120906	2015-12-09 05:25:03+00:00	2015-12-10 04:36:55+00:00	Netrakona	Ward No-05	Islampur	NA	Negative	NA	Negative	NA	Negative	NA	Negative	26.75	Maybe	27.525	Maybe	NA	Negative	32.21	Negative	NA	Negative	NA	Negative	28.185	Negative	NA	Negative	8.6	Positive	NA	Negative	NA	Negative	NA	Negative	19.81	Positive	19.36	Positive	NA	Negative	34.31	Negative	NA	NonDetect	30.485
812	N120907	2015-12-09 05:28:37+00:00	2015-12-10 04:00:16+00:00	Netrakona	Medni	Medni	NA	Negative	NA	Negative	NA	Negative	NA	Negative	NA	Negative	NA	Negative	NA	Negative	29.285	Negative	NA	Negative	NA	Negative	NA	Negative	NA	Negative	12.055	Positive	NA	Negative	NA	Negative	NA	Negative	16.08	Positive	NA	Negative	NA	Negative	NA	Negative	NA	NonDetect	32.69
813	N120908	2015-12-09 05:52:09+00:00	2015-12-09 12:00:10+00:00	Netrakona	Kailati	Maujebali	NA	Negative	NA	Negative	NA	Negative	NA	Negative	31.345	Negative	27.16	Maybe	NA	Negative	31.86	Negative	NA	Negative	NA	Negative	NA	Negative	NA	Negative	13.495	Positive	NA	Negative	NA	Negative	NA	Negative	NA	Negative	25.14	Positive	NA	Negative	31.04	Negative	NA	NonDetect	28.63
814	N120909	2015-12-09 06:08:54+00:00	2015-12-10 04:35:55+00:00	Netrakona	Ward No-09	Balai Nagua	NA	Negative	NA	Negative	NA	Negative	NA	Negative	NA	Negative	NA	Negative	NA	Negative	NA	Negative	NA	Negative	NA	Negative	NA	Negative	NA	Negative	NA	Negative	NA	Negative	NA	Negative	NA	Negative	NA	Negative	NA	Negative	NA	Negative	NA	Negative	NA	NonDetect	NA
815	N120910	2015-12-09 06:18:29+00:00	2015-12-10 04:27:12+00:00	Netrakona	Barhatta	Sadhuhati	NA	Negative	NA	Negative	NA	Negative	NA	Negative	NA	Negative	NA	Negative	NA	Negative	NA	Negative	NA	Negative	NA	Negative	32	Negative	NA	Negative	13.045	Positive	NA	Negative	NA	Negative	NA	Negative	NA	Negative	NA	Negative	NA	Negative	NA	Negative	NA	NonDetect	32.37
816	N120911	2015-12-09 07:40:42+00:00	2015-12-10 04:20:54+00:00	Netrakona	Ward No-08	Nagra Uttar	NA	Negative	NA	Negative	NA	Negative	NA	Negative	31.66	Negative	NA	Negative	NA	Negative	NA	Negative	NA	Negative	NA	Negative	32.505	Negative	NA	Negative	15.855	Positive	NA	Negative	NA	Negative	NA	Negative	NA	Negative	NA	Negative	NA	Negative	20.855	Positive	NA	NonDetect	29.9
817	N120912	2015-12-09 07:50:07+00:00	2015-12-10 14:00:54+00:00	Mymensingh	Maoha	Ramkrishnapur	NA	Negative	NA	Negative	NA	Negative	NA	Negative	NA	Negative	NA	Negative	29.6	Negative	31.04	Negative	NA	Negative	NA	Negative	29.27	Negative	NA	Negative	9.845	Positive	NA	Negative	NA	Negative	NA	Negative	29.855	Negative	26.025	Maybe	26.42	Maybe	NA	Negative	NA	NonDetect	31.72
818	N120913	2015-12-09 08:06:10+00:00	2015-12-09 12:00:47+00:00	Netrakona	Medni	Purba Uluati	NA	Negative	NA	Negative	NA	Negative	NA	Negative	NA	Negative	NA	Negative	26.89	Maybe	NA	Negative	NA	Negative	NA	Negative	NA	Negative	NA	Negative	9.57	Positive	NA	Negative	29.11	Negative	NA	Negative	32.735	Negative	NA	Negative	NA	Negative	NA	Negative	NA	NonDetect	33.14
819	N120914	2015-12-09 10:00:56+00:00	2015-12-11 05:50:23+00:00	Netrakona	Kailati	Maujebali	NA	Negative	NA	Negative	NA	Negative	NA	Negative	NA	Negative	NA	Negative	NA	Negative	NA	Negative	NA	Negative	NA	Negative	29.42	Negative	NA	Negative	11.79	Positive	NA	Negative	NA	Negative	NA	Negative	NA	Negative	NA	Negative	NA	Negative	NA	Negative	NA	NonDetect	33.03
820	N120915	2015-12-09 10:00:35+00:00	2015-12-11 05:50:09+00:00	Netrakona	Kailati	Maujebali	NA	Negative	NA	Negative	NA	Negative	NA	Negative	NA	Negative	NA	Negative	NA	Negative	32.19	Negative	NA	Negative	NA	Negative	30.725	Negative	NA	Negative	13.22	Positive	NA	Negative	NA	Negative	NA	Negative	NA	Negative	NA	Negative	NA	Negative	NA	Negative	NA	NonDetect	NA
821	N120916	2015-12-09 11:06:35+00:00	2015-12-11 05:50:24+00:00	Netrakona	Kailati	Maujebali	NA	NA	NA	NA	NA	NA	NA	NA	NA	NA	NA	NA	NA	NA	NA	NA	NA	NA	NA	NA	NA	NA	NA	NA	NA	NA	NA	NA	NA	NA	NA	NA	NA	NA	NA	NA	NA	NA	NA	NA	NA	NA	NA
822	N120917	2015-12-09 17:38:53+00:00	2015-12-10 04:30:05+00:00	Netrakona	Ward No-07	Masjid Quarter	NA	Negative	NA	Negative	NA	Negative	NA	Negative	31.97	Negative	NA	Negative	24.43	Positive	NA	Negative	NA	Negative	NA	Negative	25.47	Positive	NA	Negative	10.785	Positive	NA	Negative	NA	Negative	NA	Negative	NA	Negative	27.945	Maybe	NA	Negative	NA	Negative	NA	NonDetect	30.905
823	N121001	2015-12-10 04:00:15+00:00	2015-12-11 05:00:10+00:00	Netrakona	Lakshmiganj	Chak Para	NA	NA	NA	NA	NA	NA	NA	NA	NA	NA	NA	NA	NA	NA	NA	NA	NA	NA	NA	NA	NA	NA	NA	NA	NA	NA	NA	NA	NA	NA	NA	NA	NA	NA	NA	NA	NA	NA	NA	NA	NA	NA	NA
824	N121002	2015-12-10 05:26:41+00:00	2015-12-12 04:30:52+00:00	Netrakona	Asma	Ujangaon	NA	Negative	NA	Negative	NA	Negative	NA	Negative	NA	Negative	NA	Negative	NA	Negative	NA	Negative	NA	Negative	NA	Negative	NA	Negative	NA	Negative	27.485	Maybe	NA	Negative	NA	Negative	NA	Negative	NA	Negative	NA	Negative	NA	Negative	NA	Negative	NA	NonDetect	NA
825	N121003	2015-12-10 08:17:20+00:00	2015-12-12 04:45:14+00:00	Netrakona	Singhar Bangla	Kandulia	NA	Negative	NA	Negative	NA	Negative	NA	Negative	31.29	Negative	NA	Negative	26.84	Maybe	NA	Negative	NA	Negative	NA	Negative	NA	Negative	NA	Negative	18.185	Positive	NA	Negative	NA	Negative	NA	Negative	NA	Negative	25.85	Positive	NA	Negative	NA	Negative	NA	NonDetect	33.7
826	N121004	2015-12-10 09:15:17+00:00	2015-12-12 13:00:18+00:00	Netrakona	Kailati	Banipur	19.735	Positive	NA	Negative	NA	Negative	NA	Negative	26.68	Maybe	NA	Negative	27.93	Maybe	NA	Negative	NA	Negative	NA	Negative	33.635	Negative	NA	Negative	11.135	Positive	NA	Negative	NA	Negative	NA	Negative	33.235	Negative	27.83	Maybe	NA	Negative	NA	Negative	30.695	Negative	NA
827	N121006	2015-12-10 09:50:25+00:00	2015-12-12 04:30:43+00:00	Netrakona	Thakurakona	Satarasree	NA	Negative	NA	Negative	NA	Negative	NA	Negative	34.42	Negative	NA	Negative	NA	Negative	NA	Negative	NA	Negative	NA	Negative	33.67	Negative	NA	Negative	20.88	Positive	34.69	Negative	NA	Negative	NA	Negative	NA	Negative	NA	Negative	NA	Negative	20.9	Positive	NA	NonDetect	28.8
828	N121201	2015-12-12 08:30:05+00:00	2015-12-13 04:00:57+00:00	Netrakona	Medni	Shaljan (Pukuria)	NA	NA	NA	NA	NA	NA	NA	NA	NA	NA	NA	NA	NA	NA	NA	NA	NA	NA	NA	NA	NA	NA	NA	NA	NA	NA	NA	NA	NA	NA	NA	NA	NA	NA	NA	NA	NA	NA	NA	NA	NA	NA	NA
829	N121202	2015-12-12 09:20:39+00:00	2015-12-14 05:30:54+00:00	Netrakona	Baniajan	Paharpur	NA	Negative	NA	Negative	NA	Negative	NA	Negative	30.565	Negative	NA	Negative	26.88	Maybe	NA	Negative	NA	Negative	NA	Negative	33.96	Negative	NA	Negative	14.275	Positive	NA	Negative	NA	Negative	NA	Negative	NA	Negative	NA	Negative	NA	Negative	NA	Negative	NA	NonDetect	NA
830	N121203	2015-12-12 10:20:42+00:00	2015-12-13 04:00:19+00:00	Netrakona	Challisha	Sanura	19.845	Positive	NA	Negative	NA	Negative	NA	Negative	NA	Negative	NA	Negative	NA	Negative	NA	Negative	NA	Negative	NA	Negative	NA	Negative	NA	Negative	16.225	Positive	NA	Negative	NA	Negative	NA	Negative	30.99	Negative	NA	Negative	NA	Negative	NA	Negative	NA	NonDetect	32.615
831	N121204	2015-12-12 10:48:50+00:00	2015-12-12 15:40:51+00:00	Netrakona	Medni	Purba Uluati	NA	NA	NA	NA	NA	NA	NA	NA	NA	NA	NA	NA	NA	NA	NA	NA	NA	NA	NA	NA	NA	NA	NA	NA	NA	NA	NA	NA	NA	NA	NA	NA	NA	NA	NA	NA	NA	NA	NA	NA	NA	NA	NA
832	N121205	2015-12-12 17:20:36+00:00	2015-12-13 04:14:56+00:00	Netrakona	Ward No-03	Bataiapara(Part)	28	NA	NA	Negative	NA	Negative	NA	Negative	26.925	Maybe	26.4	Maybe	NA	Negative	34.445	Negative	NA	Negative	NA	Negative	33.14	Negative	NA	Negative	13.07	Positive	NA	Negative	NA	Negative	NA	Negative	NA	Negative	NA	Negative	NA	Negative	28.31	Negative	NA	NonDetect	33.36
833	N121301	2015-12-13 00:15:16+00:00	2015-12-14 04:00:47+00:00	Netrakona	Thakurakona	Durgasram	NA	Negative	NA	Negative	NA	Negative	NA	Negative	NA	Negative	NA	Negative	NA	Negative	NA	Negative	NA	Negative	NA	Negative	32.23	Negative	NA	Negative	12.64	Positive	NA	Negative	NA	Negative	NA	Negative	NA	Negative	15.97	Positive	NA	Negative	NA	Negative	NA	NonDetect	33.13
834	N121302	2015-12-13 00:20:23+00:00	2015-12-15 05:00:44+00:00	Netrakona	Ward No-09	Kurpar	NA	Negative	NA	Negative	NA	Negative	NA	Negative	NA	Negative	NA	Negative	NA	Negative	29.96	Negative	NA	Negative	NA	Negative	29.405	Negative	NA	Negative	10.815	Positive	NA	Negative	NA	Negative	NA	Negative	26.39	Maybe	NA	Negative	NA	Negative	NA	Negative	NA	NonDetect	27.475
835	N121303	2015-12-13 04:08:05+00:00	2015-12-14 05:30:37+00:00	Netrakona	Ward No-05	Malni	NA	Negative	NA	Negative	NA	Negative	NA	Negative	NA	Negative	NA	Negative	NA	Negative	29.35	Negative	NA	Negative	NA	Negative	27.27	Maybe	NA	Negative	10.1	Positive	NA	Negative	NA	Negative	18.665	Positive	NA	Negative	NA	Negative	23.41	Positive	31.205	Negative	NA	NonDetect	30.945
836	N121304	2015-12-13 05:00:28+00:00	2015-12-14 04:10:11+00:00	Netrakona	Singhar Bangla	Roydum Ruhi	NA	Negative	NA	Negative	NA	Negative	NA	Negative	23.53	Positive	NA	Negative	NA	Negative	NA	Negative	NA	Negative	NA	Negative	NA	Negative	NA	Negative	10.835	Positive	NA	Negative	NA	Negative	NA	Negative	NA	Negative	NA	Negative	NA	Negative	NA	Negative	NA	NonDetect	33.305
837	N121305	2015-12-13 05:40:04+00:00	2015-12-17 00:00:11+00:00	Netrakona	Medni	Digjan	NA	Negative	NA	Negative	NA	Negative	NA	Negative	32.46	Negative	NA	Negative	26.54	Maybe	NA	Negative	NA	Negative	NA	Negative	NA	Negative	NA	Negative	12.61	Positive	NA	Negative	NA	Negative	NA	Negative	NA	Negative	NA	Negative	NA	Negative	NA	Negative	NA	NonDetect	32.47
838	N121306	2015-12-13 06:30:56+00:00	2015-12-14 05:00:12+00:00	Netrakona	Ward No-09	Dharia	NA	Negative	NA	Negative	NA	Negative	NA	Negative	NA	Negative	NA	Negative	NA	Negative	34.48	Negative	NA	Negative	NA	Negative	31.625	Negative	NA	Negative	12.81	Positive	NA	Negative	27.765	Maybe	NA	Negative	NA	Negative	18.665	Positive	NA	Negative	NA	Negative	NA	NonDetect	32.68
839	N121308	2015-12-13 11:00:52+00:00	2015-12-14 05:30:09+00:00	Netrakona	Ward No-07	Katly	NA	Negative	NA	Negative	NA	Negative	NA	Negative	NA	Negative	NA	Negative	NA	Negative	29.215	Negative	NA	Negative	NA	Negative	NA	Negative	NA	Negative	11.71	Positive	NA	Negative	NA	Negative	NA	Negative	NA	Negative	NA	Negative	22.675	Positive	NA	Negative	NA	NonDetect	NA
840	N121309	2015-12-13 11:30:09+00:00	2015-12-14 04:00:10+00:00	Netrakona	Roypur	Kanda Para	NA	Negative	NA	Negative	NA	Negative	NA	Negative	23.58	Positive	NA	Negative	NA	Negative	NA	Negative	NA	Negative	NA	Negative	33.02	Negative	NA	Negative	14.04	Positive	NA	Negative	NA	Negative	NA	Negative	NA	Negative	NA	Negative	NA	Negative	NA	Negative	NA	NonDetect	30.06
841	N121310	2015-12-13 11:40:17+00:00	2015-12-15 04:15:09+00:00	Netrakona	Sarmaisa	Basati	NA	Negative	NA	Negative	NA	Negative	NA	Negative	NA	Negative	NA	Negative	25.595	Positive	NA	Negative	NA	Negative	NA	Negative	NA	Negative	NA	Negative	18.84	Positive	NA	Negative	NA	Negative	NA	Negative	NA	Negative	NA	Negative	NA	Negative	NA	Negative	NA	NonDetect	34.94
842	N121311	2015-12-13 11:50:03+00:00	2015-12-14 04:00:05+00:00	Netrakona	Roypur	Rampur	NA	NA	NA	NA	NA	NA	NA	NA	NA	NA	NA	NA	NA	NA	NA	NA	NA	NA	NA	NA	NA	NA	NA	NA	NA	NA	NA	NA	NA	NA	NA	NA	NA	NA	NA	NA	NA	NA	NA	NA	NA	NA	NA
843	N121312	2015-12-13 13:00:23+00:00	2015-12-15 04:22:49+00:00	Netrakona	Sahata	Kadam Deuli	NA	Negative	26.04	Maybe	NA	Negative	NA	Negative	27.105	Maybe	27.58	Maybe	NA	Negative	NA	Negative	NA	Negative	NA	Negative	33.37	Negative	NA	Negative	15.665	Positive	NA	Negative	NA	Negative	25.325	Positive	NA	Negative	19.315	Positive	NA	Negative	31.69	Negative	NA	NonDetect	NA
844	N121313	2015-12-13 13:10:49+00:00	2015-12-14 04:00:11+00:00	Netrakona	Kailati	Satburikanda	NA	Negative	NA	Negative	NA	Negative	NA	Negative	34.26	Negative	NA	Negative	NA	Negative	30.65	Negative	NA	Negative	NA	Negative	33.69	Negative	NA	Negative	15.165	Positive	NA	Negative	NA	Negative	NA	Negative	NA	Negative	27.84	Maybe	NA	Negative	NA	Negative	NA	NonDetect	34.46
845	N121314	2015-12-13 16:30:30+00:00	2015-12-14 04:00:22+00:00	Netrakona	Challisha	Bamnikona	NA	Negative	NA	Negative	NA	Negative	NA	Negative	NA	Negative	NA	Negative	25.505	Positive	NA	Negative	NA	Negative	NA	Negative	NA	Negative	NA	Negative	20.525	Positive	NA	Negative	NA	Negative	NA	Negative	NA	Negative	NA	Negative	NA	Negative	NA	Negative	NA	NonDetect	31.51
846	N121315	2015-12-13 04:30:24+00:00	2015-12-14 03:55:47+00:00	Netrakona	Barhatta	Bari	NA	Negative	NA	Negative	NA	Negative	34.62	Negative	NA	Negative	NA	Negative	NA	Negative	NA	Negative	NA	Negative	NA	Negative	NA	Negative	NA	Negative	26.81	Maybe	NA	Negative	NA	Negative	NA	Negative	NA	Negative	NA	Negative	NA	Negative	NA	Negative	NA	NonDetect	NA
847	N121401	2015-12-13 23:00:37+00:00	2015-12-14 08:50:15+00:00	Netrakona	Asma	Kamalpur	NA	NA	NA	NA	NA	NA	NA	NA	NA	NA	NA	NA	NA	NA	NA	NA	NA	NA	NA	NA	NA	NA	NA	NA	NA	NA	NA	NA	NA	NA	NA	NA	NA	NA	NA	NA	NA	NA	NA	NA	NA	NA	NA
848	N121402	2015-12-14 03:00:45+00:00	2015-12-14 07:00:21+00:00	Netrakona	Ward No-09	Nizampur	NA	Negative	34.46	Negative	NA	Negative	NA	Negative	27.65	Maybe	NA	Negative	NA	Negative	NA	Negative	NA	Negative	NA	Negative	30.41	Negative	NA	Negative	11.005	Positive	NA	Negative	NA	Negative	NA	Negative	NA	Negative	NA	Negative	NA	Negative	NA	Negative	NA	NonDetect	NA
849	N121403	2015-12-14 05:33:01+00:00	2015-12-17 05:00:07+00:00	Netrakona	Pogla	Bade Charulia	NA	Negative	NA	Negative	NA	Negative	NA	Negative	28.43	Negative	NA	Negative	NA	Negative	NA	Negative	NA	Negative	NA	Negative	NA	Negative	NA	Negative	16.335	Positive	NA	Negative	NA	Negative	NA	Negative	NA	Negative	NA	Negative	NA	Negative	NA	Negative	NA	NonDetect	NA
850	N121404	2015-12-14 05:35:46+00:00	2015-12-17 05:00:05+00:00	Netrakona	Ward No-08	Nagra Uttar	NA	Negative	NA	Negative	NA	Negative	NA	Negative	NA	Negative	NA	Negative	NA	Negative	NA	Negative	NA	Negative	NA	Negative	NA	Negative	NA	Negative	16.21	Positive	NA	Negative	NA	Negative	NA	Negative	NA	Negative	NA	Negative	NA	Negative	NA	Negative	NA	NonDetect	NA
851	N121405	2015-12-14 06:00:24+00:00	2015-12-15 12:00:56+00:00	Netrakona	Balaishimul	Noadiadigar	NA	Negative	NA	Negative	NA	Negative	NA	Negative	25.615	Positive	17.155	Positive	NA	Negative	NA	Negative	NA	Negative	NA	Negative	33.91	Negative	NA	Negative	13.495	Positive	NA	Negative	NA	Negative	NA	Negative	NA	Negative	27.87	Maybe	NA	Negative	NA	Negative	29.01	Negative	30.31
852	N121406	2015-12-14 06:05:46+00:00	2015-12-15 04:00:26+00:00	Netrakona	Challisha	Panchashi Para	NA	Negative	NA	Negative	NA	Negative	NA	Negative	NA	Negative	NA	Negative	NA	Negative	NA	Negative	NA	Negative	NA	Negative	NA	Negative	NA	Negative	22.5	Positive	NA	Negative	NA	Negative	NA	Negative	NA	Negative	NA	Negative	NA	Negative	21.92	Positive	NA	NonDetect	32.58
853	N121407	2015-12-14 07:50:11+00:00	2015-12-15 04:20:40+00:00	Netrakona	Singhar Bangla	Pratappur	NA	Negative	NA	Negative	NA	Negative	NA	Negative	NA	Negative	NA	Negative	NA	Negative	33.42	Negative	NA	Negative	NA	Negative	NA	Negative	NA	Negative	19.285	Positive	NA	Negative	NA	Negative	NA	Negative	NA	Negative	24.89	Positive	NA	Negative	NA	Negative	NA	NonDetect	34.3
854	N121408	2015-12-14 09:10:10+00:00	2015-12-15 04:10:48+00:00	Netrakona	Medni	Medni	NA	Negative	NA	Negative	NA	Negative	NA	Negative	31.15	Negative	NA	Negative	NA	Negative	31.52	Negative	NA	Negative	NA	Negative	NA	Negative	NA	Negative	10.465	Positive	NA	Negative	NA	Negative	NA	Negative	34.93	Negative	NA	Negative	NA	Negative	29.72	Negative	NA	NonDetect	32.79
855	N121410	2015-12-14 10:45:32+00:00	2015-12-15 05:00:28+00:00	Netrakona	Maugati	Natorkona	NA	Negative	NA	Negative	NA	Negative	NA	Negative	31.255	Negative	NA	Negative	30.145	Negative	30.7	Negative	NA	Negative	NA	Negative	NA	Negative	NA	Negative	15.805	Positive	NA	Negative	NA	Negative	NA	Negative	NA	Negative	NA	Negative	NA	Negative	31.415	Negative	NA	NonDetect	29.405
856	N121411	2015-12-14 11:00:18+00:00	2015-12-15 05:00:59+00:00	Netrakona	Kailati	Phaiska	NA	Negative	NA	Negative	NA	Negative	NA	Negative	32.8	Negative	NA	Negative	NA	Negative	NA	Negative	NA	Negative	NA	Negative	NA	Negative	NA	Negative	20.38	Positive	NA	Negative	NA	Negative	NA	Negative	NA	Negative	NA	Negative	NA	Negative	NA	Negative	28.36	Negative	NA
857	N121412	2015-12-14 15:50:07+00:00	2015-12-15 13:00:41+00:00	Netrakona	Singhar Bangla	Hariarganti	NA	Negative	NA	Negative	NA	Negative	NA	Negative	27.555	Maybe	28.46	Negative	29.98	Negative	33.66	Negative	NA	Negative	NA	Negative	26.76	Maybe	NA	Negative	8.675	Positive	NA	Negative	NA	Negative	NA	Negative	32.19	Negative	NA	Negative	27.32	Maybe	NA	Negative	NA	NonDetect	30.395
858	N121501	2015-12-15 03:00:04+00:00	2015-12-16 13:00:32+00:00	Netrakona	Lakshmiganj	Boyraura	NA	NA	NA	NA	NA	NA	NA	NA	NA	NA	NA	NA	NA	NA	NA	NA	NA	NA	NA	NA	NA	NA	NA	NA	NA	NA	NA	NA	NA	NA	NA	NA	NA	NA	NA	NA	NA	NA	NA	NA	NA	NA	NA
859	N121502	2015-12-15 03:36:00+00:00	2015-12-15 12:00:18+00:00	Netrakona	Narandia	Habibpur	NA	Negative	NA	Negative	NA	Negative	NA	Negative	29.895	Negative	NA	Negative	NA	Negative	NA	Negative	NA	Negative	NA	Negative	NA	Negative	NA	Negative	15.23	Positive	NA	Negative	NA	Negative	NA	Negative	NA	Negative	NA	Negative	NA	Negative	20.86	Positive	NA	NonDetect	28.87
860	N121503	2015-12-15 03:40:59+00:00	2015-12-17 00:00:38+00:00	Netrakona	Baniajan	Panchgaj	NA	NA	NA	NA	NA	NA	NA	NA	NA	NA	NA	NA	NA	NA	NA	NA	NA	NA	NA	NA	NA	NA	NA	NA	NA	NA	NA	NA	NA	NA	NA	NA	NA	NA	NA	NA	NA	NA	NA	NA	NA	NA	NA
861	N121504	2015-12-15 06:20:41+00:00	2015-12-17 05:00:41+00:00	Netrakona	Singhar Bangla	Kandulia	NA	NA	NA	NA	NA	NA	NA	NA	NA	NA	NA	NA	NA	NA	NA	NA	NA	NA	NA	NA	NA	NA	NA	NA	NA	NA	NA	NA	NA	NA	NA	NA	NA	NA	NA	NA	NA	NA	NA	NA	NA	NA	NA
862	N121505	2015-12-15 06:30:00+00:00	2015-12-17 01:00:41+00:00	Netrakona	Thakurakona	Betati	NA	Negative	NA	Negative	NA	Negative	NA	Negative	NA	Negative	NA	Negative	NA	Negative	NA	Negative	NA	Negative	NA	Negative	34.65	Negative	NA	Negative	14.835	Positive	NA	Negative	34.57	Negative	NA	Negative	NA	Negative	NA	Negative	21.545	Positive	NA	Negative	NA	NonDetect	NA
863	N121506	2015-12-15 07:50:07+00:00	2015-12-17 05:00:36+00:00	Netrakona	Maugati	Mohanpur	NA	Negative	NA	Negative	NA	Negative	NA	Negative	NA	Negative	NA	Negative	NA	Negative	NA	Negative	NA	Negative	NA	Negative	33.48	Negative	NA	Negative	18.585	Positive	NA	Negative	27.16	Maybe	NA	Negative	NA	Negative	NA	Negative	NA	Negative	NA	Negative	25.27	Positive	28.705
864	N121507	2015-12-15 09:37:46+00:00	2015-12-16 23:00:25+00:00	Netrakona	Maugati	Mara Dighi	NA	Negative	NA	Negative	NA	Negative	NA	Negative	NA	Negative	27.03	Maybe	NA	Negative	33.21	Negative	NA	Negative	NA	Negative	NA	Negative	NA	Negative	18.445	Positive	NA	Negative	NA	Negative	NA	Negative	NA	Negative	NA	Negative	NA	Negative	NA	Negative	NA	NonDetect	NA
865	N121508	2015-12-15 11:00:34+00:00	2015-12-17 04:30:17+00:00	Netrakona	Chhiram	Bahadurpur	NA	Negative	NA	Negative	NA	Negative	NA	Negative	NA	Negative	NA	Negative	26.64	Maybe	NA	Negative	NA	Negative	NA	Negative	29.895	Negative	NA	Negative	20.09	Positive	NA	Negative	NA	Negative	NA	Negative	NA	Negative	28.015	Negative	NA	Negative	NA	Negative	24.975	Positive	NA
866	N121701	2015-12-17 02:20:45+00:00	2015-12-18 04:00:02+00:00	Netrakona	Pogla	Kailati	NA	Negative	NA	Negative	NA	Negative	NA	Negative	NA	Negative	NA	Negative	26.94	Maybe	NA	Negative	NA	Negative	NA	Negative	NA	Negative	NA	Negative	17.805	Positive	NA	Negative	NA	Negative	NA	Negative	NA	Negative	NA	Negative	NA	Negative	34.625	Negative	NA	NonDetect	27.83
867	N121702	2015-12-17 03:00:04+00:00	2015-12-19 04:40:33+00:00	Netrakona	Maugati	Bahar Jamati	NA	Negative	NA	Negative	NA	Negative	NA	Negative	NA	Negative	NA	Negative	NA	Negative	34.05	Negative	NA	Negative	NA	Negative	NA	Negative	NA	Negative	13.55	Positive	NA	Negative	NA	Negative	NA	Negative	NA	Negative	NA	Negative	NA	Negative	NA	Negative	17.785	Positive	32.33
868	N121703	2015-12-17 04:40:12+00:00	2015-12-20 06:00:07+00:00	Netrakona	Kailati	Kutubpur	NA	Negative	NA	Negative	NA	Negative	NA	Negative	31.165	Negative	NA	Negative	NA	Negative	32.07	Negative	NA	Negative	NA	Negative	34.035	Negative	NA	Negative	15.335	Positive	NA	Negative	NA	Negative	NA	Negative	NA	Negative	22	Positive	NA	Negative	NA	Negative	NA	NonDetect	NA
869	N121704	2015-12-17 06:40:31+00:00	2015-12-19 04:20:53+00:00	Netrakona	Ward No-04	New Town Bilpar	NA	Negative	NA	Negative	NA	Negative	NA	Negative	26.955	Maybe	NA	Negative	NA	Negative	NA	Negative	NA	Negative	NA	Negative	32.54	Negative	NA	Negative	11.76	Positive	NA	Negative	NA	Negative	NA	Negative	NA	Negative	18.415	Positive	NA	Negative	NA	Negative	NA	NonDetect	32.325
870	N121705	2015-12-17 07:00:26+00:00	2015-12-17 15:00:11+00:00	Netrakona	Ward No-05	Malni Road	NA	NA	NA	NA	NA	NA	NA	NA	NA	NA	NA	NA	NA	NA	NA	NA	NA	NA	NA	NA	NA	NA	NA	NA	NA	NA	NA	NA	NA	NA	NA	NA	NA	NA	NA	NA	NA	NA	NA	NA	NA	NA	NA
871	N121706	2015-12-17 09:00:31+00:00	2015-12-19 05:00:12+00:00	Netrakona	Sarmaisa	Mataikata	NA	Negative	NA	Negative	NA	Negative	NA	Negative	22.99	Positive	NA	Negative	NA	Negative	NA	Negative	NA	Negative	NA	Negative	34.58	Negative	NA	Negative	8.86	Positive	NA	Negative	NA	Negative	NA	Negative	NA	Negative	NA	Negative	NA	Negative	NA	Negative	NA	NonDetect	25.92
872	N121901	2015-12-18 21:40:34+00:00	2015-12-20 06:00:52+00:00	Netrakona	Lengura	Shibpur	NA	Negative	NA	Negative	NA	Negative	NA	Negative	NA	Negative	NA	Negative	NA	Negative	NA	Negative	NA	Negative	NA	Negative	NA	Negative	NA	Negative	19.46	Positive	NA	Negative	NA	Negative	NA	Negative	NA	Negative	NA	Negative	NA	Negative	NA	Negative	NA	NonDetect	NA
873	N121902	2015-12-19 03:20:10+00:00	2015-12-21 04:30:17+00:00	Netrakona	Medni	Medni	NA	Negative	NA	Negative	NA	Negative	NA	Negative	25.65	Positive	NA	Negative	28.51	Negative	32.84	Negative	NA	Negative	NA	Negative	NA	Negative	NA	Negative	10.22	Positive	NA	Negative	NA	Negative	NA	Negative	32.82	Negative	15.77	Positive	NA	Negative	34.9	Negative	NA	NonDetect	32.65
874	N121903	2015-12-19 04:00:40+00:00	2015-12-20 04:20:38+00:00	Netrakona	Ward No-07	Katly	NA	Negative	NA	Negative	NA	Negative	NA	Negative	NA	Negative	27.76	Maybe	NA	Negative	NA	Negative	NA	Negative	NA	Negative	NA	Negative	NA	Negative	19.815	Positive	NA	Negative	NA	Negative	NA	Negative	NA	Negative	NA	Negative	NA	Negative	20.91	Positive	NA	NonDetect	28.82
875	N121904	2015-12-19 04:10:09+00:00	2015-12-20 04:28:58+00:00	Netrakona	Rauha	Rauha	NA	Negative	NA	Negative	NA	Negative	NA	Negative	32.54	Negative	NA	Negative	NA	Negative	NA	Negative	NA	Negative	NA	Negative	28.88	Negative	28.01	Negative	12.965	Positive	NA	Negative	NA	Negative	NA	Negative	NA	Negative	NA	Negative	NA	Negative	NA	Negative	19.74	Positive	32.87
876	N121905	2015-12-19 04:30:29+00:00	2015-12-20 04:30:47+00:00	Netrakona	Lakshmiganj	Atka Para	NA	Negative	NA	Negative	NA	Negative	NA	Negative	31.745	Negative	NA	Negative	NA	Negative	NA	Negative	33.43	Negative	NA	Negative	34	Negative	NA	Negative	16.645	Positive	NA	Negative	NA	Negative	NA	Negative	NA	Negative	23.315	Positive	NA	Negative	34.2	Negative	NA	NonDetect	NA
877	N121906	2015-12-19 07:00:35+00:00	2015-12-21 04:00:26+00:00	Netrakona	Dhala Mulgaon	Dasashi	NA	Negative	NA	Negative	NA	Negative	NA	Negative	32.555	Negative	NA	Negative	NA	Negative	NA	Negative	NA	Negative	NA	Negative	NA	Negative	NA	Negative	13.21	Positive	NA	Negative	NA	Negative	NA	Negative	NA	Negative	23.97	Positive	NA	Negative	NA	Negative	27.86	Maybe	32.78
878	N121907	2015-12-19 11:33:36+00:00	2015-12-20 05:50:25+00:00	Netrakona	Ward No-08	Nagra Pashim	NA	Negative	NA	Negative	NA	Negative	NA	Negative	NA	Negative	NA	Negative	NA	Negative	NA	Negative	NA	Negative	NA	Negative	NA	Negative	NA	Negative	18.69	Positive	NA	Negative	NA	Negative	NA	Negative	NA	Negative	NA	Negative	NA	Negative	NA	Negative	22.355	Positive	NA
879	N121908	2015-12-19 12:46:16+00:00	2015-12-20 04:20:43+00:00	Netrakona	Ward No-02	Satpai Town	NA	Negative	NA	Negative	NA	Negative	NA	Negative	25.315	Positive	NA	Negative	NA	Negative	NA	Negative	NA	Negative	NA	Negative	33.945	Negative	NA	Negative	13.38	Positive	NA	Negative	NA	Negative	NA	Negative	NA	Negative	NA	Negative	NA	Negative	NA	Negative	NA	NonDetect	NA
880	N121909	2015-12-19 13:35:13+00:00	2015-12-20 04:30:34+00:00	Netrakona	Amtala	Panch Kahania	NA	Negative	NA	Negative	NA	Negative	NA	Negative	32.795	Negative	NA	Negative	NA	Negative	NA	Negative	NA	Negative	NA	Negative	NA	Negative	NA	Negative	15.7	Positive	NA	Negative	NA	Negative	NA	Negative	NA	Negative	NA	Negative	24.495	Positive	NA	Negative	NA	NonDetect	NA
881	N122001	2015-12-20 00:30:33+00:00	2015-12-20 06:00:32+00:00	Netrakona	Thakurakona	Satarasree	NA	Negative	NA	Negative	NA	Negative	NA	Negative	NA	Negative	NA	Negative	NA	Negative	27.9	Maybe	NA	Negative	NA	Negative	NA	Negative	NA	Negative	14.22	Positive	NA	Negative	NA	Negative	NA	Negative	NA	Negative	NA	Negative	NA	Negative	NA	Negative	NA	NonDetect	31.5
882	N122002	2015-12-20 02:00:47+00:00	2015-12-21 04:30:55+00:00	Netrakona	Ward No-02	Satpai Town	NA	Negative	NA	Negative	NA	Negative	NA	Negative	32.79	Negative	NA	Negative	NA	Negative	NA	Negative	NA	Negative	NA	Negative	NA	Negative	NA	Negative	14.93	Positive	NA	Negative	NA	Negative	NA	Negative	NA	Negative	NA	Negative	NA	Negative	NA	Negative	NA	NonDetect	NA
883	N122004	2015-12-20 03:44:22+00:00	2015-12-22 04:00:06+00:00	Netrakona	Challisha	Challisha	NA	Negative	NA	Negative	NA	Negative	NA	Negative	NA	Negative	NA	Negative	28.145	Negative	NA	Negative	NA	Negative	NA	Negative	33.06	Negative	NA	Negative	12.905	Positive	NA	Negative	NA	Negative	NA	Negative	NA	Negative	17.035	Positive	NA	Negative	NA	Negative	NA	NonDetect	34.05
884	N122005	2015-12-20 04:00:20+00:00	2015-12-21 04:35:15+00:00	Netrakona	Ward No-02	Chak Para Pashim	NA	Negative	NA	Negative	NA	Negative	NA	Negative	21.835	Positive	NA	Negative	NA	Negative	NA	Negative	NA	Negative	NA	Negative	29.555	Negative	NA	Negative	9.145	Positive	NA	Negative	NA	Negative	NA	Negative	NA	Negative	27.725	Maybe	NA	Negative	NA	Negative	NA	NonDetect	30.575
885	N122006	2015-12-20 05:00:29+00:00	2015-12-21 04:21:13+00:00	Netrakona	Ward No-09	Kurpar	NA	NA	NA	NA	NA	NA	NA	NA	NA	NA	NA	NA	NA	NA	NA	NA	NA	NA	NA	NA	NA	NA	NA	NA	NA	NA	NA	NA	NA	NA	NA	NA	NA	NA	NA	NA	NA	NA	NA	NA	NA	NA	NA
886	N122007	2015-12-20 05:40:02+00:00	2015-12-21 04:20:49+00:00	Netrakona	Challisha	Sakhua	NA	NA	NA	NA	NA	NA	NA	NA	NA	NA	NA	NA	NA	NA	NA	NA	NA	NA	NA	NA	NA	NA	NA	NA	NA	NA	NA	NA	NA	NA	NA	NA	NA	NA	NA	NA	NA	NA	NA	NA	NA	NA	NA
887	N122008	2015-12-20 06:00:29+00:00	2015-12-21 04:32:03+00:00	Netrakona	Challisha	Sakhua	NA	Negative	NA	Negative	NA	Negative	NA	Negative	NA	Negative	NA	Negative	NA	Negative	33.185	Negative	NA	Negative	NA	Negative	34.555	Negative	NA	Negative	15.39	Positive	NA	Negative	NA	Negative	NA	Negative	NA	Negative	24.905	Positive	NA	Negative	22.31	Positive	33.94	Negative	28.53
888	N122009	2015-12-20 07:10:42+00:00	2015-12-21 04:25:37+00:00	Netrakona	Loneshwar	Khila	NA	Negative	NA	Negative	NA	Negative	NA	Negative	NA	Negative	NA	Negative	NA	Negative	NA	Negative	NA	Negative	NA	Negative	NA	Negative	NA	Negative	22.995	Positive	NA	Negative	NA	Negative	NA	Negative	NA	Negative	NA	Negative	NA	Negative	NA	Negative	NA	NonDetect	NA
889	N122010	2015-12-20 07:12:21+00:00	2015-12-21 10:00:25+00:00	Netrakona	Thakurakona	Betati	NA	Negative	NA	Negative	NA	Negative	NA	Negative	34.06	Negative	NA	Negative	27.91	Maybe	NA	Negative	NA	Negative	NA	Negative	NA	Negative	NA	Negative	18.56	Positive	NA	Negative	NA	Negative	NA	Negative	NA	Negative	24.745	Positive	NA	Negative	21.725	Positive	NA	NonDetect	31.255
890	N122012	2015-12-20 09:30:58+00:00	2015-12-21 04:20:55+00:00	Sunamganj	Dakshin Bongshikunda	Alampur	NA	Negative	NA	Negative	NA	Negative	NA	Negative	NA	Negative	NA	Negative	24.83	Positive	28.545	Negative	NA	Negative	NA	Negative	27.33	Maybe	NA	Negative	9.755	Positive	NA	Negative	NA	Negative	NA	Negative	31.08	Negative	NA	Negative	NA	Negative	28.74	Negative	NA	NonDetect	32.14
891	N122013	2015-12-20 09:30:00+00:00	2015-12-21 04:22:28+00:00	Netrakona	Ward No-07	Katly	NA	Negative	34.54	Negative	NA	Negative	NA	Negative	33.625	Negative	NA	Negative	NA	Negative	NA	Negative	NA	Negative	NA	Negative	NA	Negative	NA	Negative	20.025	Positive	NA	Negative	NA	Negative	NA	Negative	NA	Negative	NA	Negative	NA	Negative	24.405	Positive	NA	NonDetect	NA
892	N122015	2015-12-20 11:36:12+00:00	2015-12-22 16:00:50+00:00	Netrakona	Balaishimul	Balaishimul	NA	Negative	NA	Negative	NA	Negative	NA	Negative	NA	Negative	NA	Negative	NA	Negative	NA	Negative	NA	Negative	NA	Negative	NA	Negative	NA	Negative	23.755	Positive	NA	Negative	NA	Negative	NA	Negative	NA	Negative	NA	Negative	NA	Negative	NA	Negative	NA	NonDetect	34.25
893	N122016	2015-12-20 15:30:36+00:00	2015-12-22 05:30:20+00:00	Netrakona	Rauha	Karli	NA	Negative	NA	Negative	NA	Negative	NA	Negative	NA	Negative	NA	Negative	NA	Negative	31.21	Negative	NA	Negative	NA	Negative	NA	Negative	NA	Negative	20.315	Positive	NA	Negative	NA	Negative	NA	Negative	NA	Negative	NA	Negative	NA	Negative	NA	Negative	NA	NonDetect	NA
894	N122101	2015-12-21 03:00:33+00:00	2015-12-21 09:00:25+00:00	Netrakona	Dakshin Bishiura	Dakshin Bishiura	NA	Negative	NA	Negative	NA	Negative	NA	Negative	29.425	Negative	NA	Negative	NA	Negative	NA	Negative	NA	Negative	NA	Negative	31.9	Negative	NA	Negative	16.42	Positive	NA	Negative	NA	Negative	NA	Negative	NA	Negative	NA	Negative	NA	Negative	NA	Negative	NA	NonDetect	29.325
895	N122102	2015-12-21 10:30:55+00:00	2015-12-23 16:35:38+00:00	Netrakona	Madanpur	Nandipur	NA	Negative	NA	Negative	NA	Negative	NA	Negative	NA	Negative	NA	Negative	NA	Negative	NA	Negative	NA	Negative	NA	Negative	NA	Negative	NA	Negative	21.3	Positive	NA	Negative	NA	Negative	NA	Negative	NA	Negative	NA	Negative	NA	Negative	NA	Negative	NA	NonDetect	33.33
896	N122103	2015-12-21 10:35:48+00:00	2015-12-22 05:00:51+00:00	Netrakona	Maugati	Chuchua	NA	NA	NA	NA	NA	NA	NA	NA	NA	NA	NA	NA	NA	NA	NA	NA	NA	NA	NA	NA	NA	NA	NA	NA	NA	NA	NA	NA	NA	NA	NA	NA	NA	NA	NA	NA	NA	NA	NA	NA	NA	NA	NA
897	N122104	2015-12-21 11:40:14+00:00	2015-12-22 05:00:07+00:00	Netrakona	Rauha	Kunia Mulnachati	NA	NA	NA	NA	NA	NA	NA	NA	NA	NA	NA	NA	NA	NA	NA	NA	NA	NA	NA	NA	NA	NA	NA	NA	NA	NA	NA	NA	NA	NA	NA	NA	NA	NA	NA	NA	NA	NA	NA	NA	NA	NA	NA
898	N122201	2015-12-22 03:25:19+00:00	2015-12-23 04:35:18+00:00	Netrakona	Ward No-07	Joynagar	NA	Negative	NA	Negative	NA	Negative	NA	Negative	34.23	Negative	24.745	Positive	NA	Negative	32.18	Negative	NA	Negative	NA	Negative	30.99	Negative	NA	Negative	15.715	Positive	NA	Negative	NA	Negative	NA	Negative	NA	Negative	NA	Negative	NA	Negative	28.37	Negative	33.78	Negative	NA
899	N122202	2015-12-22 04:13:33+00:00	2015-12-23 04:30:57+00:00	Netrakona	Ward No-09	Dharia	NA	Negative	NA	Negative	NA	Negative	NA	Negative	26.215	Maybe	NA	Negative	NA	Negative	NA	Negative	NA	Negative	NA	Negative	34.26	Negative	NA	Negative	16.22	Positive	NA	Negative	NA	Negative	NA	Negative	NA	Negative	NA	Negative	NA	Negative	32.79	Negative	NA	NonDetect	NA
900	N122203	2015-12-22 06:00:48+00:00	2015-12-23 03:50:43+00:00	Netrakona	Sahata	Boaljana	NA	Negative	NA	Negative	NA	Negative	NA	Negative	NA	Negative	NA	Negative	29.46	Negative	28.29	Negative	NA	Negative	NA	Negative	24.26	Positive	NA	Negative	9.12	Positive	NA	Negative	26.75	Maybe	NA	Negative	NA	Negative	29.85	Negative	NA	Negative	NA	Negative	NA	NonDetect	28.7
901	N122204	2015-12-22 06:14:43+00:00	2015-12-23 11:30:05+00:00	Netrakona	Sahata	Kadam Deuli	NA	Negative	NA	Negative	NA	Negative	NA	Negative	25.715	Positive	NA	Negative	NA	Negative	30.235	Negative	NA	Negative	NA	Negative	28.64	Negative	NA	Negative	13.375	Positive	NA	Negative	NA	Negative	NA	Negative	34.97	Negative	18.245	Positive	NA	Negative	NA	Negative	NA	NonDetect	33.93
902	N122205	2015-12-22 06:20:04+00:00	2015-12-23 04:20:42+00:00	Netrakona	Ward No-02	Satpai Town	NA	Negative	NA	Negative	NA	Negative	NA	Negative	NA	Negative	NA	Negative	NA	Negative	NA	Negative	NA	Negative	NA	Negative	NA	Negative	NA	Negative	22.29	Positive	NA	Negative	NA	Negative	NA	Negative	NA	Negative	28	NA	NA	Negative	NA	Negative	NA	NonDetect	NA
903	N122206	2015-12-22 06:48:48+00:00	2015-12-23 15:40:54+00:00	Netrakona	Maugati	Jamati	NA	Negative	NA	Negative	NA	Negative	NA	Negative	28.525	Negative	NA	Negative	NA	Negative	NA	Negative	NA	Negative	NA	Negative	NA	Negative	NA	Negative	16.425	Positive	NA	Negative	NA	Negative	NA	Negative	NA	Negative	19.565	Positive	NA	Negative	NA	Negative	NA	NonDetect	33.225
904	N122208	2015-12-22 08:50:52+00:00	2015-12-23 16:40:06+00:00	Netrakona	Ward No-09	Parla	NA	Negative	NA	Negative	NA	Negative	NA	Negative	25.025	Positive	27.07	Maybe	21.68	Positive	NA	Negative	NA	Negative	NA	Negative	32.88	Negative	NA	Negative	14.11	Positive	NA	Negative	NA	Negative	NA	Negative	NA	Negative	NA	Negative	NA	Negative	NA	Negative	NA	NonDetect	NA
905	N122209	2015-12-22 10:45:21+00:00	2015-12-23 03:40:07+00:00	Netrakona	Kaliara Gabragat	Kaliara	NA	NA	NA	NA	NA	NA	NA	NA	NA	NA	NA	NA	NA	NA	NA	NA	NA	NA	NA	NA	NA	NA	NA	NA	NA	NA	NA	NA	NA	NA	NA	NA	NA	NA	NA	NA	NA	NA	NA	NA	NA	NA	NA
906	N122210	2015-12-22 10:45:57+00:00	2015-12-24 01:00:30+00:00	Netrakona	Kaliara Gabragat	Gabragati	NA	Negative	NA	Negative	NA	Negative	NA	Negative	NA	Negative	NA	Negative	NA	Negative	NA	Negative	NA	Negative	NA	Negative	31.87	Negative	NA	Negative	22.74	Positive	NA	Negative	NA	Negative	NA	Negative	NA	Negative	NA	Negative	NA	Negative	NA	Negative	NA	NonDetect	NA
907	N122211	2015-12-22 11:25:32+00:00	2015-12-24 05:00:18+00:00	Netrakona	Kaliara Gabragat	Gabragati	NA	Negative	NA	Negative	NA	Negative	NA	Negative	NA	Negative	NA	Negative	28.29	Negative	NA	Negative	32.98	Negative	NA	Negative	NA	Negative	NA	Negative	24.45	Positive	NA	Negative	NA	Negative	27.93	Maybe	NA	Negative	NA	Negative	NA	Negative	NA	Negative	NA	NonDetect	NA
908	N122212	2015-12-22 12:37:47+00:00	2015-12-24 05:00:41+00:00	Netrakona	Challisha	Sanura	NA	NA	NA	NA	NA	NA	NA	NA	NA	NA	NA	NA	NA	NA	NA	NA	NA	NA	NA	NA	NA	NA	NA	NA	NA	NA	NA	NA	NA	NA	NA	NA	NA	NA	NA	NA	NA	NA	NA	NA	NA	NA	NA
909	N122213	2015-12-22 13:45:05+00:00	2015-12-23 03:30:58+00:00	Netrakona	Chhiram	NA	NA	NA	NA	NA	NA	NA	NA	NA	NA	NA	NA	NA	NA	NA	NA	NA	NA	NA	NA	NA	NA	NA	NA	NA	NA	NA	NA	NA	NA	NA	NA	NA	NA	NA	NA	NA	NA	NA	NA	NA	NA	NA	NA
910	N122301	2015-12-23 01:55:23+00:00	2015-12-23 12:30:44+00:00	Netrakona	Ward No-02	Satpai Town	NA	Negative	NA	Negative	NA	Negative	NA	Negative	NA	Negative	NA	Negative	NA	Negative	NA	Negative	NA	Negative	NA	Negative	NA	Negative	NA	Negative	19.835	Positive	NA	Negative	NA	Negative	NA	Negative	NA	Negative	27.555	Maybe	NA	Negative	26.39	Maybe	NA	NonDetect	32.16
911	N122303	2015-12-23 02:53:15+00:00	2015-12-24 05:00:59+00:00	Netrakona	Kaliara Gabragat	Gabragati	NA	Negative	NA	Negative	NA	Negative	NA	Negative	28.77	Negative	NA	Negative	27.21	Maybe	34.84	Negative	NA	Negative	NA	Negative	34.93	Negative	NA	Negative	15.275	Positive	NA	Negative	NA	Negative	NA	Negative	NA	Negative	NA	Negative	NA	Negative	22.84	Positive	32.14	Negative	32.51
912	N122304	2015-12-23 03:00:49+00:00	2015-12-24 06:25:05+00:00	Netrakona	Thakurakona	Barni	NA	Negative	NA	Negative	NA	Negative	NA	Negative	NA	Negative	NA	Negative	30.355	Negative	NA	Negative	NA	Negative	NA	Negative	NA	Negative	NA	Negative	21.36	Positive	NA	Negative	NA	Negative	NA	Negative	NA	Negative	NA	Negative	NA	Negative	NA	Negative	NA	NonDetect	NA
913	N122305	2015-12-23 04:00:17+00:00	2015-12-23 13:00:01+00:00	Netrakona	Ward No-08	Nagra Uttar	NA	Negative	NA	Negative	NA	Negative	NA	Negative	33.17	Negative	NA	Negative	29.14	Negative	NA	Negative	NA	Negative	NA	Negative	NA	Negative	29.63	Negative	17.165	Positive	NA	Negative	NA	Negative	NA	Negative	NA	Negative	NA	Negative	NA	Negative	NA	Negative	NA	NonDetect	33.89
914	N122306	2015-12-23 04:34:53+00:00	2015-12-25 07:00:54+00:00	Netrakona	Ward No-02	Satpai Town	NA	Negative	NA	Negative	NA	Negative	NA	Negative	28.44	Negative	NA	Negative	NA	Negative	29.185	Negative	NA	Negative	NA	Negative	33.24	Negative	NA	Negative	14.22	Positive	NA	Negative	NA	Negative	NA	Negative	NA	Negative	NA	Negative	NA	Negative	NA	Negative	NA	NonDetect	NA
915	N122307	2015-12-23 05:38:57+00:00	2015-12-23 12:00:27+00:00	Netrakona	Ward No-02	Satpai Town	NA	Negative	NA	Negative	NA	Negative	NA	Negative	30.03	Negative	NA	Negative	NA	Negative	NA	Negative	NA	Negative	NA	Negative	NA	Negative	NA	Negative	16.115	Positive	NA	Negative	NA	Negative	NA	Negative	NA	Negative	28.78	Negative	NA	Negative	NA	Negative	28.45	Negative	NA
916	N122308	2015-12-23 06:00:14+00:00	2015-12-23 13:00:50+00:00	Netrakona	Ward No-09	Kurpar	NA	Negative	NA	Negative	NA	Negative	NA	Negative	30.995	Negative	23.2	Positive	NA	Negative	NA	Negative	NA	Negative	NA	Negative	NA	Negative	NA	Negative	17.235	Positive	NA	Negative	NA	Negative	NA	Negative	NA	Negative	26.81	Maybe	NA	Negative	NA	Negative	NA	NonDetect	NA
917	N122309	2015-12-23 06:21:54+00:00	2015-12-25 07:00:58+00:00	Netrakona	Ward No-09	Parla	NA	Negative	NA	Negative	NA	Negative	NA	Negative	32.135	Negative	NA	Negative	NA	Negative	NA	Negative	NA	Negative	NA	Negative	NA	Negative	NA	Negative	19.705	Positive	NA	Negative	NA	Negative	NA	Negative	NA	Negative	21.605	Positive	NA	Negative	NA	Negative	NA	NonDetect	NA
918	N122311	2015-12-22 18:45:10+00:00	2015-12-23 23:00:18+00:00	Netrakona	Ward No-07	Joynagar	NA	Negative	NA	Negative	NA	Negative	NA	Negative	NA	Negative	NA	Negative	31.22	Negative	NA	Negative	NA	Negative	NA	Negative	NA	Negative	NA	Negative	21.42	Positive	NA	Negative	NA	Negative	NA	Negative	NA	Negative	NA	Negative	NA	Negative	NA	Negative	NA	NonDetect	NA
919	N122312	2015-12-23 11:00:59+00:00	2015-12-24 12:00:40+00:00	Netrakona	Challisha	Challisha	NA	Negative	NA	Negative	NA	Negative	NA	Negative	NA	Negative	NA	Negative	NA	Negative	NA	Negative	NA	Negative	NA	Negative	NA	Negative	NA	Negative	24.24	Positive	NA	Negative	NA	Negative	NA	Negative	NA	Negative	NA	Negative	NA	Negative	NA	Negative	NA	NonDetect	NA
920	N122313	2015-12-23 13:30:17+00:00	2015-12-24 10:00:12+00:00	Netrakona	Sukhari	Khala Para	NA	Negative	NA	Negative	NA	Negative	NA	Negative	28.89	Negative	NA	Negative	25.19	Positive	NA	Negative	NA	Negative	NA	Negative	NA	Negative	NA	Negative	12.385	Positive	NA	Negative	NA	Negative	NA	Negative	NA	Negative	27.76	Maybe	NA	Negative	NA	Negative	NA	NonDetect	33.97
921	N122401	2015-12-23 18:30:30+00:00	2015-12-24 12:30:44+00:00	Netrakona	Medni	Nischintapur	NA	Negative	NA	Negative	NA	Negative	NA	Negative	33.96	Negative	NA	Negative	NA	Negative	31.4	Negative	NA	Negative	NA	Negative	28.23	Negative	NA	Negative	14.355	Positive	NA	Negative	NA	Negative	NA	Negative	NA	Negative	NA	Negative	NA	Negative	NA	Negative	NA	NonDetect	29.725
922	N122402	2015-12-24 02:00:32+00:00	2015-12-26 15:00:41+00:00	Netrakona	Ward No-07	Katly	NA	Negative	NA	Negative	NA	Negative	NA	Negative	29.795	Negative	27.22	Maybe	NA	Negative	34.39	Negative	NA	Negative	NA	Negative	32.04	Negative	NA	Negative	14.495	Positive	NA	Negative	NA	Negative	NA	Negative	19.75	Positive	NA	Negative	NA	Negative	28.17	Negative	NA	NonDetect	34.37
923	N122403	2015-12-24 04:54:44+00:00	2015-12-24 14:00:10+00:00	Netrakona	Ward No-07	Katly	NA	Negative	NA	Negative	33.22	Negative	NA	Negative	NA	Negative	26.535	Maybe	NA	Negative	30.68	Negative	NA	Negative	NA	Negative	25.29	Positive	NA	Negative	8.78	Positive	34.92	Negative	NA	Negative	NA	Negative	NA	Negative	NA	Negative	NA	Negative	23.465	Positive	NA	NonDetect	26.125
924	N122404	2015-12-24 05:11:47+00:00	2015-12-25 06:00:03+00:00	Netrakona	Ward No-07	Katly	NA	Negative	NA	Negative	NA	Negative	NA	Negative	NA	Negative	27.57	Maybe	NA	Negative	NA	Negative	NA	Negative	NA	Negative	NA	Negative	NA	Negative	21.07	Positive	NA	Negative	NA	Negative	NA	Negative	NA	Negative	NA	Negative	NA	Negative	32.97	Negative	NA	NonDetect	NA
925	N122601	2015-12-26 04:33:04+00:00	2015-12-26 14:00:46+00:00	Netrakona	Ward No-09	Dharia	NA	Negative	NA	Negative	NA	Negative	NA	Negative	24.54	Positive	15.515	Positive	NA	Negative	34.6	Negative	NA	Negative	NA	Negative	32.32	Negative	NA	Negative	11.46	Positive	NA	Negative	27.645	Maybe	NA	Negative	NA	Negative	NA	Negative	NA	Negative	26.75	Maybe	NA	NonDetect	32.9
926	N122602	2015-12-26 04:34:38+00:00	2015-12-26 10:37:41+00:00	Netrakona	Medni	Digjan	NA	Negative	NA	Negative	NA	Negative	NA	Negative	NA	Negative	NA	Negative	NA	Negative	33.97	Negative	NA	Negative	NA	Negative	34.02	Negative	NA	Negative	14.945	Positive	NA	Negative	NA	Negative	NA	Negative	NA	Negative	NA	Negative	NA	Negative	25.66	Positive	NA	NonDetect	34.94
927	N122603	2015-12-26 05:00:13+00:00	2015-12-28 04:05:50+00:00	Netrakona	Kalmakanda	Baidyagaon	NA	Negative	NA	Negative	NA	Negative	NA	Negative	25.97	Positive	NA	Negative	NA	Negative	27.93	Maybe	NA	Negative	NA	Negative	30.97	Negative	NA	Negative	12.22	Positive	NA	Negative	28.82	Negative	NA	Negative	34.81	Negative	NA	Negative	NA	Negative	30.015	Negative	NA	NonDetect	30.865
928	N122604	2015-12-26 05:10:00+00:00	2015-12-28 04:22:45+00:00	Netrakona	Kailati	Dakshin Kanda Para	NA	Negative	25.645	Positive	NA	Negative	NA	Negative	33.68	Negative	NA	Negative	NA	Negative	NA	Negative	NA	Negative	NA	Negative	34.86	Negative	NA	Negative	16.715	Positive	NA	Negative	NA	Negative	NA	Negative	NA	Negative	27.035	Maybe	NA	Negative	NA	Negative	NA	NonDetect	NA
929	N122605	2015-12-26 06:19:05+00:00	2015-12-26 14:00:59+00:00	Netrakona	Ward No-09	Parla	NA	NA	NA	NA	NA	NA	NA	NA	NA	NA	NA	NA	NA	NA	NA	NA	NA	NA	NA	NA	NA	NA	NA	NA	NA	NA	NA	NA	NA	NA	NA	NA	NA	NA	NA	NA	NA	NA	NA	NA	NA	NA	NA
930	N122606	2015-12-26 07:25:01+00:00	2015-12-28 00:00:57+00:00	Netrakona	Kailati	Maujebali	NA	Negative	NA	Negative	NA	Negative	NA	Negative	34.66	Negative	NA	Negative	NA	Negative	NA	Negative	NA	Negative	NA	Negative	NA	Negative	NA	Negative	15.295	Positive	NA	Negative	NA	Negative	NA	Negative	NA	Negative	NA	Negative	NA	Negative	NA	Negative	NA	NonDetect	32.74
931	N122607	2015-12-26 09:15:48+00:00	2015-12-28 04:15:02+00:00	Netrakona	Ward No-09	Kurpar	NA	Negative	NA	Negative	NA	Negative	NA	Negative	32	Negative	NA	Negative	24.72	Positive	NA	Negative	NA	Negative	NA	Negative	34.35	Negative	NA	Negative	13.72	Positive	NA	Negative	NA	Negative	NA	Negative	NA	Negative	21.49	Positive	NA	Negative	NA	Negative	NA	NonDetect	NA
932	N122608	2015-12-26 09:25:06+00:00	2015-12-27 00:00:58+00:00	Netrakona	Narandia	Habibpur	NA	NA	NA	NA	NA	NA	NA	NA	NA	NA	NA	NA	NA	NA	NA	NA	NA	NA	NA	NA	NA	NA	NA	NA	NA	NA	NA	NA	NA	NA	NA	NA	NA	NA	NA	NA	NA	NA	NA	NA	NA	NA	NA
933	N122609	2015-12-26 09:28:03+00:00	2015-12-27 08:00:43+00:00	Netrakona	Ward No-03	Mahendarapur	NA	Negative	NA	Negative	NA	Negative	NA	Negative	31.17	Negative	NA	Negative	27.43	Maybe	NA	Negative	NA	Negative	NA	Negative	NA	Negative	NA	Negative	16.355	Positive	NA	Negative	NA	Negative	NA	Negative	NA	Negative	NA	Negative	NA	Negative	NA	Negative	NA	NonDetect	NA
934	N122610	2015-12-26 11:35:57+00:00	2015-12-28 04:11:57+00:00	Netrakona	Loneshwar	Mirzapur	NA	Negative	NA	Negative	NA	Negative	NA	Negative	27.05	Maybe	NA	Negative	NA	Negative	NA	Negative	NA	Negative	NA	Negative	NA	Negative	NA	Negative	14.96	Positive	NA	Negative	NA	Negative	NA	Negative	NA	Negative	26.42	Maybe	NA	Negative	NA	Negative	NA	NonDetect	NA
935	N122611	2015-12-26 15:00:27+00:00	2015-12-28 04:15:30+00:00	Netrakona	Thakurakona	Asadati	NA	Negative	NA	Negative	NA	Negative	NA	Negative	29.75	Negative	NA	Negative	NA	Negative	NA	Negative	NA	Negative	NA	Negative	NA	Negative	NA	Negative	17.7	Positive	NA	Negative	NA	Negative	NA	Negative	NA	Negative	NA	Negative	NA	Negative	NA	Negative	NA	NonDetect	NA
936	N122612	2015-12-26 15:30:47+00:00	2015-12-28 01:00:41+00:00	Netrakona	Ward No-08	Nagra Uttar	NA	Negative	NA	Negative	NA	Negative	NA	Negative	NA	Negative	NA	Negative	NA	Negative	NA	Negative	NA	Negative	NA	Negative	NA	Negative	NA	Negative	22.695	Positive	NA	Negative	NA	Negative	NA	Negative	NA	Negative	NA	Negative	NA	Negative	NA	Negative	26.74	Maybe	32.6
937	N122613	2015-12-26 16:30:09+00:00	2015-12-29 04:35:53+00:00	Netrakona	Ward No-03	Pukuria	NA	Negative	NA	Negative	NA	Negative	NA	Negative	33.95	Negative	NA	Negative	28.72	Negative	NA	Negative	NA	Negative	NA	Negative	NA	Negative	NA	Negative	19.965	Positive	NA	Negative	NA	Negative	NA	Negative	NA	Negative	NA	Negative	NA	Negative	NA	Negative	NA	NonDetect	NA
938	N122701	2015-12-27 03:49:44+00:00	2015-12-27 15:00:51+00:00	Netrakona	Singhar Bangla	Bijoypur	NA	Negative	NA	Negative	NA	Negative	NA	Negative	30.57	Negative	27.53	Maybe	NA	Negative	31.88	Negative	NA	Negative	NA	Negative	34.35	Negative	NA	Negative	17.88	Positive	NA	Negative	NA	Negative	NA	Negative	NA	Negative	NA	Negative	NA	Negative	NA	Negative	NA	NonDetect	NA
939	N122702	2015-12-27 04:17:08+00:00	2015-12-28 04:20:58+00:00	Netrakona	Medni	Digjan	NA	Negative	NA	Negative	NA	Negative	NA	Negative	27.83	Maybe	NA	Negative	28.36	Negative	NA	Negative	NA	Negative	NA	Negative	NA	Negative	NA	Negative	14.83	Positive	NA	Negative	NA	Negative	NA	Negative	NA	Negative	31.6	Negative	NA	Negative	27.26	Maybe	NA	NonDetect	NA
940	N122703	2015-12-27 04:30:13+00:00	2015-12-27 08:30:58+00:00	Netrakona	Rauha	Balijuri	NA	Negative	NA	Negative	NA	Negative	NA	Negative	34.61	Negative	NA	Negative	NA	Negative	NA	Negative	NA	Negative	NA	Negative	NA	Negative	NA	Negative	17.35	Positive	NA	Negative	NA	Negative	NA	Negative	NA	Negative	NA	Negative	NA	Negative	23.215	Positive	NA	NonDetect	32.04
941	N122704	2015-12-27 05:20:54+00:00	2015-12-28 14:00:32+00:00	Netrakona	Maugati	Jamati	NA	NA	NA	NA	NA	NA	NA	NA	NA	NA	NA	NA	NA	NA	NA	NA	NA	NA	NA	NA	NA	NA	NA	NA	NA	NA	NA	NA	NA	NA	NA	NA	NA	NA	NA	NA	NA	NA	NA	NA	NA	NA	NA
942	N122705	2015-12-27 06:45:50+00:00	2015-12-27 13:00:37+00:00	Netrakona	Ward No-05	Malni	NA	Negative	27.21	Maybe	NA	Negative	NA	Negative	33.74	Negative	NA	Negative	30.03	Negative	33.64	Negative	NA	Negative	NA	Negative	NA	Negative	NA	Negative	16.49	Positive	NA	Negative	NA	Negative	NA	Negative	NA	Negative	NA	Negative	NA	Negative	NA	Negative	NA	NonDetect	NA
943	N122706	2015-12-27 06:50:44+00:00	2015-12-27 10:00:33+00:00	Netrakona	Ward No-02	Dakhin Satpai Nadir Par(Palpar	NA	Negative	25.375	Positive	NA	Negative	NA	Negative	33.45	Negative	NA	Negative	NA	Negative	34.78	Negative	NA	Negative	NA	Negative	NA	Negative	NA	Negative	16.61	Positive	NA	Negative	NA	Negative	NA	Negative	NA	Negative	NA	Negative	27.01	Maybe	NA	Negative	NA	NonDetect	NA
944	N122707	2015-12-27 07:00:07+00:00	2015-12-27 12:00:19+00:00	Netrakona	Barhatta	Baruhati	NA	NA	NA	NA	NA	NA	NA	NA	NA	NA	NA	NA	NA	NA	NA	NA	NA	NA	NA	NA	NA	NA	NA	NA	NA	NA	NA	NA	NA	NA	NA	NA	NA	NA	NA	NA	NA	NA	NA	NA	NA	NA	NA
945	N122708	2015-12-27 07:40:29+00:00	2015-12-28 04:00:04+00:00	Netrakona	Medni	Krishnapur	NA	Negative	NA	Negative	NA	Negative	NA	Negative	26.17	Maybe	NA	Negative	NA	Negative	NA	Negative	NA	Negative	NA	Negative	NA	Negative	NA	Negative	14.6	Positive	NA	Negative	NA	Negative	NA	Negative	NA	Negative	27.415	Maybe	NA	Negative	NA	Negative	NA	NonDetect	NA
946	N122709	2015-12-27 12:30:44+00:00	2015-12-30 01:00:48+00:00	Netrakona	Bairati	Kajla	NA	Negative	NA	Negative	NA	Negative	NA	Negative	24.84	Positive	NA	Negative	NA	Negative	34.35	Negative	NA	Negative	NA	Negative	30.66	Negative	NA	Negative	13.48	Positive	NA	Negative	NA	Negative	NA	Negative	NA	Negative	27.85	Maybe	24.14	Positive	NA	Negative	NA	NonDetect	NA
947	N122710	2015-12-27 15:00:21+00:00	2015-12-31 03:40:01+00:00	Netrakona	Amtala	Shibprasadpur	NA	Negative	NA	Negative	NA	Negative	NA	Negative	31.465	Negative	NA	Negative	NA	Negative	NA	Negative	NA	Negative	NA	Negative	NA	Negative	NA	Negative	18.94	Positive	NA	Negative	NA	Negative	NA	Negative	NA	Negative	NA	Negative	NA	Negative	NA	Negative	NA	NonDetect	NA
948	N122711	2015-12-27 17:00:05+00:00	2015-12-29 05:00:34+00:00	Netrakona	Ward No-02	Chak Para Pashim	NA	Negative	NA	Negative	32.56	Negative	NA	Negative	32.835	Negative	NA	Negative	NA	Negative	NA	Negative	NA	Negative	NA	Negative	NA	Negative	NA	Negative	18.39	Positive	NA	Negative	NA	Negative	NA	Negative	NA	Negative	NA	Negative	NA	Negative	NA	Negative	NA	NonDetect	NA
949	N122712	2015-12-27 17:50:09+00:00	2015-12-29 04:34:48+00:00	Netrakona	Challisha	Dariyagi	NA	Negative	NA	Negative	NA	Negative	NA	Negative	28.725	Negative	NA	Negative	NA	Negative	NA	Negative	NA	Negative	NA	Negative	29.27	Negative	NA	Negative	14.83	Positive	NA	Negative	NA	Negative	21.71	Positive	20.105	Positive	NA	Negative	NA	Negative	20.235	Positive	NA	NonDetect	29.015
950	N122801	2015-12-28 02:25:01+00:00	2015-12-29 04:33:43+00:00	Netrakona	Ward No-01	Gram Satpai_(1)	NA	NA	NA	NA	NA	NA	NA	NA	NA	NA	NA	NA	NA	NA	NA	NA	NA	NA	NA	NA	NA	NA	NA	NA	NA	NA	NA	NA	NA	NA	NA	NA	NA	NA	NA	NA	NA	NA	NA	NA	NA	NA	NA
951	N122802	2015-12-28 05:00:34+00:00	2015-12-31 01:00:38+00:00	Netrakona	Rauha	Kunia Mulnachati	NA	Negative	NA	Negative	NA	Negative	NA	Negative	34.56	Negative	NA	Negative	NA	Negative	32.68	Negative	NA	Negative	NA	Negative	NA	Negative	NA	Negative	17.205	Positive	NA	Negative	NA	Negative	NA	Negative	27.16	Maybe	NA	Negative	NA	Negative	NA	Negative	NA	NonDetect	NA
952	N122803	2015-12-28 05:12:10+00:00	2015-12-30 01:30:34+00:00	Netrakona	Ward No-02	Satpai Town	NA	Negative	NA	Negative	NA	Negative	NA	Negative	NA	Negative	NA	Negative	28.91	Negative	NA	Negative	NA	Negative	NA	Negative	NA	Negative	NA	Negative	10.595	Positive	NA	Negative	NA	Negative	NA	Negative	NA	Negative	NA	Negative	NA	Negative	NA	Negative	NA	NonDetect	31.09
953	N122806	2015-12-28 06:08:20+00:00	2015-12-30 14:00:54+00:00	Netrakona	Ward No-07	Katly	NA	Negative	NA	Negative	NA	Negative	NA	Negative	33.685	Negative	27.66	Maybe	NA	Negative	NA	Negative	NA	Negative	NA	Negative	NA	Negative	NA	Negative	17.955	Positive	NA	Negative	NA	Negative	NA	Negative	NA	Negative	NA	Negative	NA	Negative	NA	Negative	NA	NonDetect	NA
954	N122807	2015-12-28 10:50:52+00:00	2015-12-29 04:50:21+00:00	Netrakona	Singhar Bangla	Saidpur	NA	NA	NA	NA	NA	NA	NA	NA	NA	NA	NA	NA	NA	NA	NA	NA	NA	NA	NA	NA	NA	NA	NA	NA	NA	NA	NA	NA	NA	NA	NA	NA	NA	NA	NA	NA	NA	NA	NA	NA	NA	NA	NA
955	N122808	2015-12-29 12:10:38+00:00	2015-12-29 04:40:23+00:00	Netrakona	Medni	Nischintapur	NA	Negative	NA	Negative	NA	Negative	NA	Negative	33.545	Negative	28.4	Negative	NA	Negative	NA	Negative	NA	Negative	NA	Negative	NA	Negative	NA	Negative	14.155	Positive	NA	Negative	NA	Negative	NA	Negative	NA	Negative	29.62	Negative	NA	Negative	NA	Negative	NA	NonDetect	NA
956	N122809	2015-12-29 01:00:17+00:00	2015-12-29 09:00:59+00:00	Netrakona	Loneshwar	Mirzapur	NA	NA	NA	NA	NA	NA	NA	NA	NA	NA	NA	NA	NA	NA	NA	NA	NA	NA	NA	NA	NA	NA	NA	NA	NA	NA	NA	NA	NA	NA	NA	NA	NA	NA	NA	NA	NA	NA	NA	NA	NA	NA	NA
957	N122810	2015-12-28 14:00:37+00:00	2015-12-29 04:30:21+00:00	Netrakona	Amtala	Atka Para	NA	Negative	NA	Negative	NA	Negative	NA	Negative	23.81	Positive	NA	Negative	26.45	Maybe	NA	Negative	NA	Negative	NA	Negative	33.09	Negative	NA	Negative	10.135	Positive	NA	Negative	NA	Negative	NA	Negative	NA	Negative	NA	Negative	NA	Negative	NA	Negative	NA	NonDetect	33.55
958	N122901	2015-12-29 01:38:26+00:00	2015-12-31 04:00:30+00:00	Netrakona	Loneshwar	Mirzapur	NA	Negative	NA	Negative	NA	Negative	NA	Negative	33.15	Negative	NA	Negative	NA	Negative	33.1	Negative	NA	Negative	NA	Negative	NA	Negative	NA	Negative	10.48	Positive	NA	Negative	NA	Negative	NA	Negative	NA	Negative	NA	Negative	28.54	Negative	NA	Negative	NA	NonDetect	31.855
959	N122902	2015-12-29 01:40:04+00:00	2015-12-31 00:00:29+00:00	Netrakona	Tiasree	Basta	NA	Negative	14.23	Positive	NA	Negative	NA	Negative	25.46	Positive	NA	Negative	NA	Negative	NA	Negative	NA	Negative	NA	Negative	32.35	Negative	NA	Negative	11.995	Positive	NA	Negative	NA	Negative	NA	Negative	NA	Negative	NA	Negative	19.28	Positive	NA	Negative	NA	NonDetect	NA
960	N122903	2015-12-29 05:16:33+00:00	2015-12-31 01:30:29+00:00	Netrakona	Roypur	Ora Dighi	NA	NA	NA	NA	NA	NA	NA	NA	NA	NA	NA	NA	NA	NA	NA	NA	NA	NA	NA	NA	NA	NA	NA	NA	NA	NA	NA	NA	NA	NA	NA	NA	NA	NA	NA	NA	NA	NA	NA	NA	NA	NA	NA
961	N122904	2015-12-29 07:20:24+00:00	2015-12-31 04:00:09+00:00	Netrakona	Kaliara Gabragat	Naria Para	NA	Negative	26.5	Maybe	NA	Negative	NA	Negative	NA	Negative	NA	Negative	NA	Negative	NA	Negative	NA	Negative	NA	Negative	NA	Negative	NA	Negative	16.865	Positive	NA	Negative	NA	Negative	NA	Negative	NA	Negative	NA	Negative	NA	Negative	NA	Negative	NA	NonDetect	NA
[truncated: 11 more columns]
